# Supplementary material for: An extensive program of periodic alternative splicing linked to cell cycle progression
Source: eLife. 2016 Mar 25;5:e10288. doi: 10.7554/eLife.10288 (PMC4884079; doi:10.7554/eLife.10288)
Supplement: Supplementary file 2. — Data associated with Figure 3. DOI: http://dx.doi.org/10.7554/eLife.10288.019 [file elife-10288-supp2.xlsx]

## Sheet: TG AS 
Event Type	ENSG	GeneSymbol	event_name	sample1_posterior_mean	sample2_posterior_mean	delta PSI	bayes_factor	ABS delta PSI
SE	ENSG00000175455	CCDC14	chr3:123679991:123680255:-@chr3:123674690:123674812:-@chr3:123667743:123667979:-	0.12	0.88	-0.76	1000000000000	0.76
SE	ENSG00000134058	CDK7	chr5:68548245:68548278:+@chr5:68551287:68551355:+@chr5:68553870:68553980:+	0.1	0.85	-0.75	2.39151e+10	0.75
SE	NA	NA	chr5:60368952:60369041:+@chr5:60394819:60394859:+@chr5:60448531:60448864:+	0.06	0.78	-0.72	1000000000000	0.72
SE	ENSG00000175455	CCDC14	chr3:123674893:123674962:-@chr3:123674690:123674812:-@chr3:123667743:123667979:-	0.14	0.82	-0.68	1000000000000	0.68
SE	ENSG00000136643	RPS6KC1	chr1:213277796:213277911:+@chr1:213290659:213290752:+@chr1:213302870:213303232:+	0.25	0.9	-0.65	14.09	0.65
SE	ENSG00000166451	CENPN	chr16:81053705:81053881:+@chr16:81056202:81056303:+@chr16:81058320:81058383:+	0.24	0.88	-0.64	1000000000000	0.64
SE	ENSG00000067113	PPAP2A	chr5:54786788:54786942:-@chr5:54771127:54771278:-@chr5:54763697:54763977:-	0.28	0.9	-0.62	1.28052e+06	0.62
SE	ENSG00000124120	TTPAL	chr20:43108625:43109084:+@chr20:43112977:43113170:+@chr20:43115236:43115346:+	0.27	0.89	-0.62	11.07	0.62
SE	ENSG00000165533	TTC8	chr14:89307381:89307540:+@chr14:89307769:89307858:+@chr14:89310150:89310194:+	0.24	0.85	-0.61	13.79	0.61
SE	ENSG00000149131	SERPING1	chr11:57365027:57365195:+@chr11:57365482:57365794:+@chr11:57367352:57367850:+	0.16	0.76	-0.6	29.29	0.6
SE	ENSG00000179818	PCBP1-AS1	chr2:70282846:70283042:-@chr2:70280863:70280924:-@chr2:70278335:70278437:-	0.27	0.87	-0.6	10.95	0.6
SE	ENSG00000182986	ZNF320	chr19:53391380:53391506:-@chr19:53386893:53386957:-@chr19:53379425:53385236:-	0.12	0.72	-0.6	6.88	0.6
SE	ENSG00000136153,ENSG00000261553	LMO7,RP11-29G8.3	chr13:76194570:76196004:+@chr13:76197407:76197456:+@chr13:76287318:76287388:+	0.2	0.8	-0.6	6.43	0.6
SE	ENSG00000107263	RAPGEF1	chr9:134526197:134526336:-@chr9:134525516:134525629:-@chr9:134518626:134518804:-	0.2	0.79	-0.59	89.42	0.59
SE	ENSG00000186522	2013-09-10	chr2:110371375:110371783:-@chr2:110350628:110350696:-@chr2:110332158:110332344:-	0.2	0.79	-0.59	20.28	0.59
SE	NA	NA	chr5:153418417:153418497:-@chr5:153417853:153417994:-@chr5:153414304:153414506:-	0.2	0.79	-0.59	5.77	0.59
SE	NA	NA	chr8:27605594:27605796:-@chr8:27597989:27598034:-@chr8:27590833:27593762:-	0.21	0.79	-0.58	20360.1	0.58
SE	ENSG00000132881	RSG1	chr1:16560107:16560259:-@chr1:16559388:16559512:-@chr1:16559005:16559141:-	0.31	0.89	-0.58	35.88	0.58
SE	ENSG00000256591	RP11-286N22.8	chr11:61205476:61205585:+@chr11:61236136:61236186:+@chr11:61249254:61249390:+	0.1	0.67	-0.57	17.18	0.57
SE	ENSG00000198707	CEP290	chr12:88530420:88530563:-@chr12:88524942:88524995:-@chr12:88524322:88524342:-	0.33	0.9	-0.57	8.09	0.57
SE	ENSG00000101166	SLMO2	chr20:57613521:57613689:-@chr20:57612246:57612354:-@chr20:57611745:57611815:-	0.41	0.97	-0.56	1000000000000	0.56
SE	ENSG00000134762	DSC3	chr18:28576757:28577014:-@chr18:28574420:28574462:-@chr18:28570052:28574338:-	0.29	0.85	-0.56	17.12	0.56
SE	ENSG00000018189	RUFY3	chr4:71600063:71600310:+@chr4:71607344:71607397:+@chr4:71628236:71628409:+	0.16	0.72	-0.56	6.62	0.56
SE	ENSG00000135525	MAP7	chr6:136847500:136847744:-@chr6:136846970:136847109:-@chr6:136742839:136742937:-	0.19	0.75	-0.56	6.09	0.56
SE	ENSG00000011523	CEP68	chr2:65301416:65301538:+@chr2:65305002:65305098:+@chr2:65309670:65309843:+	0.31	0.86	-0.55	1041.04	0.55
SE	ENSG00000122299	ZC3H7A	chr16:11864639:11864843:-@chr16:11862887:11862951:-@chr16:11862171:11862357:-	0.33	0.88	-0.55	115.34	0.55
SE	ENSG00000168385	2013-09-02	chr2:242256914:242257014:+@chr2:242257652:242257759:+@chr2:242263631:242263656:+	0.11	0.66	-0.55	64.95	0.55
SE	ENSG00000130935	NOL11	chr17:65717494:65717642:+@chr17:65718696:65718753:+@chr17:65720165:65720309:+	0.35	0.9	-0.55	7.69	0.55
SE	ENSG00000114491	UMPS	chr3:124450353:124450451:+@chr3:124453940:124454093:+@chr3:124456415:124457086:+	0.35	0.89	-0.54	2.13111e+09	0.54
SE	ENSG00000104529	EEF1D	chr8:144679518:144679845:-@chr8:144674817:144674967:-@chr8:144672778:144672905:-	0.38	0.92	-0.54	215.97	0.54
SE	NA	NA	chr22:44224940:44225078:-@chr22:44223394:44223520:-@chr22:44220387:44221993:-	0.34	0.88	-0.54	85.39	0.54
SE	ENSG00000095794	CREM	chr10:35464515:35464633:+@chr10:35467800:35467914:+@chr10:35468062:35468204:+	0.39	0.93	-0.54	48.46	0.54
SE	ENSG00000162614	NEXN	chr1:78383810:78383958:+@chr1:78390873:78390914:+@chr1:78392099:78392296:+	0.27	0.81	-0.54	25.22	0.54
SE	ENSG00000108474	PIGL	chr17:16216861:16216928:+@chr17:16219995:16220026:+@chr17:16221089:16221222:+	0.24	0.78	-0.54	9.43	0.54
SE	ENSG00000100802	C14orf93	chr14:23479310:23479360:-@chr14:23470168:23470240:-@chr14:23467997:23468571:-	0.17	0.71	-0.54	7.19	0.54
SE	ENSG00000138777	PPA2	chr4:106395051:106395227:-@chr4:106374755:106374799:-@chr4:106370507:106370560:-	0.17	0.7	-0.53	524198	0.53
SE	ENSG00000131725	WDR44	chrX:117512382:117512415:+@chrX:117521303:117521377:+@chrX:117526595:117527234:+	0.17	0.7	-0.53	6.33	0.53
SE	ENSG00000105750	ZNF85	chr19:21106059:21106209:+@chr19:21116830:21116956:+@chr19:21117755:21117853:+	0.21	0.74	-0.53	5.25	0.53
SE	ENSG00000158163	DZIP1L	chr3:137834170:137834451:-@chr3:137831206:137831342:-@chr3:137822313:137822894:-	0.25	0.77	-0.52	6.3	0.52
SE	ENSG00000134138	MEIS2	chr15:37390168:37390400:-@chr15:37388490:37388631:-@chr15:37387765:37387815:-	0.32	0.83	-0.51	46.04	0.51
SE	ENSG00000070010	UFD1L	chr22:19442325:19442353:-@chr22:19439401:19439523:-@chr22:19437464:19438267:-	0.32	0.83	-0.51	35.91	0.51
SE	ENSG00000163138	PACRGL	chr4:20702036:20702201:+@chr4:20702294:20702410:+@chr4:20703764:20703844:+	0.37	0.88	-0.51	18.49	0.51
SE	ENSG00000144802	NFKBIZ	chr3:101574577:101574746:+@chr3:101575917:101576027:+@chr3:101576136:101576303:+	0.37	0.88	-0.51	10.51	0.51
SE	ENSG00000134138	MEIS2	chr15:37390168:37390400:-@chr15:37388490:37388608:-@chr15:37387765:37387815:-	0.17	0.68	-0.51	7.97	0.51
SE	ENSG00000196652	ZKSCAN5	chr7:99117450:99117532:+@chr7:99117792:99117927:+@chr7:99123436:99124041:+	0.33	0.83	-0.5	118.44	0.5
SE	ENSG00000231607	DLEU2	chr13:50655959:50656139:-@chr13:50649695:50649789:-@chr13:50642233:50642299:-	0.21	0.71	-0.5	23.1	0.5
SE	ENSG00000238105	GOLGA2B	chr12:100551306:100551517:-@chr12:100551127:100551223:-@chr12:100550943:100551034:-	0.29	0.78	-0.49	17.94	0.49
SE	ENSG00000131797	KIAA0664L3	chr16:31711934:31712059:+@chr16:31712984:31713179:+@chr16:31713856:31714002:+	0.1	0.59	-0.49	7.38	0.49
SE	ENSG00000150433	TMEM218	chr11:124981481:124981659:-@chr11:124980540:124980642:-@chr11:124972630:124972705:-	0.16	0.65	-0.49	7.15	0.49
SE	ENSG00000246273	RP11-540A21.3	chr11:9801923:9802122:+@chr11:9804587:9804656:+@chr11:9812416:9812791:+	0.28	0.77	-0.49	5.55	0.49
SE	ENSG00000237651,ENSG00000162929	C2orf74,KIAA1841	chr2:61372243:61372331:+@chr2:61389977:61390090:+@chr2:61390187:61390367:+	0.47	0.95	-0.48	17919.4	0.48
SE	ENSG00000075413	MARK3	chr14:103871413:103871604:+@chr14:103894724:103894777:+@chr14:103915256:103915304:+	0.36	0.84	-0.48	117.06	0.48
SE	ENSG00000177679	SRRM3	chr7:75912282:75912419:+@chr7:75912842:75912920:+@chr7:75914933:75916605:+	0.11	0.59	-0.48	7.83	0.48
SE	ENSG00000113658	SMAD5	chr5:135469042:135469648:+@chr5:135483521:135483595:+@chr5:135489281:135489852:+	0.34	0.82	-0.48	6.64	0.48
SE	ENSG00000180198	RCC1	chr1:28835342:28835417:+@chr1:28843237:28843365:+@chr1:28856370:28856451:+	0.4	0.87	-0.47	1000000000000	0.47
SE	ENSG00000164172	MOCS2	chr5:52402907:52403051:-@chr5:52397927:52398054:-@chr5:52396241:52396364:-	0.48	0.95	-0.47	1000000000000	0.47
SE	ENSG00000253882	RP11-61L23.2	chr7:143533250:143533304:-@chr7:143530340:143530976:-@chr7:143509061:143510872:-	0.43	0.9	-0.47	179.27	0.47
SE	ENSG00000154040	CABYR	chr18:21718955:21719082:+@chr18:21723094:21723223:+@chr18:21735665:21736006:+	0.38	0.85	-0.47	152.79	0.47
SE	ENSG00000244754	N4BP2L2	chr13:33091994:33092140:-@chr13:33054727:33054774:-@chr13:33016525:33018263:-	0.15	0.62	-0.47	27.58	0.47
SE	ENSG00000152904	GGPS1	chr1:235491869:235492093:+@chr1:235498557:235498649:+@chr1:235505023:235505093:+	0.45	0.91	-0.46	1000000000000	0.46
SE	ENSG00000124006	OBSL1	chr2:220422545:220422832:-@chr2:220422065:220422340:-@chr2:220421176:220421445:-	0.41	0.87	-0.46	1.35053e+07	0.46
SE	ENSG00000124067	SLC12A4	chr16:67985043:67985207:-@chr16:67984557:67984963:-@chr16:67984222:67984396:-	0.35	0.81	-0.46	171.54	0.46
SE	ENSG00000112367	FIG4	chr6:110056353:110056501:+@chr6:110064313:110064475:+@chr6:110064878:110064975:+	0.37	0.83	-0.46	64.93	0.46
SE	ENSG00000049883	PTCD2	chr5:71622439:71622568:+@chr5:71630845:71630923:+@chr5:71631621:71631712:+	0.17	0.63	-0.46	15.23	0.46
SE	ENSG00000154479	C2orf77	chr2:170550771:170550931:-@chr2:170537517:170537743:-@chr2:170531377:170531550:-	0.44	0.9	-0.46	10.08	0.46
SE	ENSG00000220804	AC093642.5	chr2:243056790:243056892:+@chr2:243058334:243058383:+@chr2:243061116:243061208:+	0.33	0.79	-0.46	6.62	0.46
SE	ENSG00000014914	MTMR11	chr1:149903836:149903906:-@chr1:149903152:149903271:-@chr1:149902684:149902857:-	0.42	0.88	-0.46	5.18	0.46
SE	ENSG00000002016	RAD52	chr12:1058768:1058863:-@chr12:1045973:1046048:-@chr12:1042141:1042242:-	0.14	0.59	-0.45	10.46	0.45
SE	ENSG00000114107	CEP70	chr3:138310696:138310798:-@chr3:138291701:138291756:-@chr3:138290108:138290198:-	0.34	0.79	-0.45	7.56	0.45
SE	ENSG00000134758	RNF138	chr18:29672663:29672849:+@chr18:29693708:29693823:+@chr18:29703481:29703537:+	0.41	0.85	-0.44	1000000000000	0.44
SE	ENSG00000138399	FASTKD1	chr2:170396561:170396689:-@chr2:170394523:170394651:-@chr2:170387862:170388000:-	0.51	0.95	-0.44	3403.74	0.44
SE	ENSG00000234899	AC005152.2	chr17:70078062:70078182:-@chr17:70070690:70072874:-@chr17:70067184:70067372:-	0.48	0.92	-0.44	3079.69	0.44
SE	NA	NA	chr7:92199137:92199229:-@chr7:92195324:92195375:-@chr7:92190072:92191682:-	0.35	0.79	-0.44	36.51	0.44
SE	ENSG00000135679	MDM2	chr12:69202988:69203072:+@chr12:69207334:69207408:+@chr12:69233054:69239212:+	0.26	0.7	-0.44	22.81	0.44
SE	NA	NA	chr11:85373433:85373501:-@chr11:85372681:85372793:-@chr11:85368608:85371641:-	0.25	0.69	-0.44	11.54	0.44
SE	ENSG00000152620	NADKD1	chr5:36201208:36201263:-@chr5:36200329:36200382:-@chr5:36197643:36197766:-	0.49	0.93	-0.44	10.24	0.44
SE	ENSG00000125388	GRK4	chr4:3030928:3031136:+@chr4:3039101:3039238:+@chr4:3042299:3042474:+	0.15	0.59	-0.44	5.97	0.44
SE	ENSG00000125954	CHURC1-FNTB	chr14:65390709:65390844:+@chr14:65392728:65392798:+@chr14:65470967:65471031:+	0.35	0.79	-0.44	5.52	0.44
SE	ENSG00000148700	ADD3	chr10:111836763:111836876:+@chr10:111838998:111839055:+@chr10:111860383:111860606:+	0.11	0.55	-0.44	5.05	0.44
SE	ENSG00000136536	2013-03-07	chr2:160599572:160599764:+@chr2:160602281:160602448:+@chr2:160604316:160605414:+	0.39	0.82	-0.43	1000000000000	0.43
SE	ENSG00000136068	FLNB	chr3:58116468:58116635:+@chr3:58117654:58117746:+@chr3:58118535:58118658:+	0.11	0.54	-0.43	1000.6	0.43
SE	ENSG00000040341	STAU2	chr8:74659018:74659162:-@chr8:74650519:74650584:-@chr8:74600889:74601048:-	0.51	0.94	-0.43	175.48	0.43
SE	ENSG00000146872	TLK2	chr17:60629663:60629758:+@chr17:60631024:60631116:+@chr17:60637377:60637487:+	0.5	0.93	-0.43	94.7	0.43
SE	ENSG00000137145	DENND4C	chr9:19369835:19369985:+@chr9:19371754:19371818:+@chr9:19372035:19374139:+	0.08	0.51	-0.43	16.26	0.43
SE	ENSG00000113300	CNOT6	chr5:179921417:179921763:+@chr5:179956275:179956388:+@chr5:179976931:179977117:+	0.43	0.86	-0.43	13.17	0.43
SE	ENSG00000164253	WDR41	chr5:76754887:76754949:-@chr5:76749642:76749735:-@chr5:76745585:76745685:-	0.43	0.86	-0.43	8.9	0.43
SE	NA	NA	chr14:55312486:55312570:-@chr14:55310500:55310587:-@chr14:55308724:55309772:-	0.28	0.71	-0.43	5.8	0.43
SE	ENSG00000134058	CDK7	chr5:68551287:68551355:+@chr5:68553870:68553980:+@chr5:68555645:68555763:+	0.44	0.86	-0.42	2.00513e+10	0.42
SE	ENSG00000138674	SEC31A	chr4:83821230:83821376:-@chr4:83819142:83819215:-@chr4:83803011:83803093:-	0.4	0.82	-0.42	26.52	0.42
SE	NA	NA	chr17:43323577:43323697:+@chr17:43323872:43323971:+@chr17:43324234:43324683:+	0.17	0.59	-0.42	25.19	0.42
SE	ENSG00000147050	KDM6A	chrX:44920569:44920664:+@chrX:44921892:44921993:+@chrX:44922667:44923062:+	0.21	0.63	-0.42	16.32	0.42
SE	ENSG00000183597	C22orf25	chr22:20039988:20040107:+@chr22:20040883:20041074:+@chr22:20043466:20043536:+	0.36	0.78	-0.42	14.48	0.42
SE	ENSG00000113456	RAD1	chr5:34914032:34914131:-@chr5:34913575:34913683:-@chr5:34911659:34911917:-	0.56	0.98	-0.42	13.23	0.42
SE	NA	NA	chr1:39347104:39347298:-@chr1:39338690:39338762:-@chr1:39332552:39332671:-	0.21	0.63	-0.42	7.89	0.42
SE	ENSG00000100372	SLC25A17	chr22:41195027:41195087:-@chr22:41190518:41190584:-@chr22:41175013:41175129:-	0.52	0.93	-0.41	771.83	0.41
SE	ENSG00000136122	BORA	chr13:73303064:73303231:+@chr13:73305419:73305525:+@chr13:73309098:73309143:+	0.32	0.73	-0.41	574.66	0.41
SE	ENSG00000168591	TMUB2	chr17:42264354:42264477:+@chr17:42265044:42265111:+@chr17:42266390:42266956:+	0.07	0.48	-0.41	220.03	0.41
SE	ENSG00000154727	GABPA	chr21:27107329:27107889:+@chr21:27113884:27113986:+@chr21:27117521:27117665:+	0.27	0.68	-0.41	29.01	0.41
SE	ENSG00000170379	FAM115C	chr7:143318045:143318113:+@chr7:143320855:143321491:+@chr7:143340957:143342767:+	0.47	0.88	-0.41	16.54	0.41
SE	ENSG00000253882	RP11-61L23.2	chr7:143533733:143533810:-@chr7:143530340:143530976:-@chr7:143509061:143510872:-	0.45	0.86	-0.41	5.52	0.41
SE	ENSG00000181315	ZNF322	chr6:26659669:26659980:-@chr6:26658786:26658874:-@chr6:26643887:26643956:-	0.39	0.8	-0.41	5.25	0.41
SE	ENSG00000114491	UMPS	chr3:124449213:124449474:+@chr3:124453940:124454093:+@chr3:124456415:124457086:+	0.56	0.96	-0.4	1.10496e+09	0.4
SE	ENSG00000150593	PDCD4	chr10:112653849:112653956:+@chr10:112654170:112654280:+@chr10:112655706:112655845:+	0.55	0.95	-0.4	5.16045e+06	0.4
SE	ENSG00000144199	FAHD2B	chr2:97760438:97760619:-@chr2:97757600:97757725:-@chr2:97757199:97757449:-	0.48	0.88	-0.4	105415	0.4
SE	ENSG00000151366	NDUFC2	chr11:77790625:77791265:-@chr11:77784044:77784118:-@chr11:77779393:77781082:-	0.41	0.81	-0.4	368.76	0.4
SE	ENSG00000148634	HERC4	chr10:69793722:69793943:-@chr10:69792535:69792626:-@chr10:69785303:69785433:-	0.49	0.89	-0.4	29.02	0.4
SE	ENSG00000183597	C22orf25	chr22:20039988:20040107:+@chr22:20040960:20041074:+@chr22:20043466:20043536:+	0.51	0.91	-0.4	16.66	0.4
SE	NA	NA	chr19:3452480:3452664:+@chr19:3456548:3456633:+@chr19:3462750:3469215:+	0.39	0.79	-0.4	7.05	0.4
SE	ENSG00000174371	EXO1	chr1:242013711:242013888:+@chr1:242015594:242015713:+@chr1:242016660:242016783:+	0.48	0.87	-0.39	1.87776e+09	0.39
SE	ENSG00000111596	CNOT2	chr12:70704675:70704797:+@chr12:70726547:70726626:+@chr12:70729218:70729343:+	0.54	0.93	-0.39	25.4	0.39
SE	ENSG00000264538	SUZ12P1	chr17:29062051:29062115:+@chr17:29070319:29070387:+@chr17:29086509:29086557:+	0.48	0.87	-0.39	20.25	0.39
SE	ENSG00000169762	TAPT1	chr4:16175827:16175895:-@chr4:16172276:16172352:-@chr4:16168256:16168416:-	0.54	0.93	-0.39	12.78	0.39
SE	ENSG00000123636	BAZ2B	chr2:160289268:160289874:-@chr2:160287374:160287667:-@chr2:160285711:160285771:-	0.42	0.81	-0.39	7.1	0.39
SE	ENSG00000134504	KCTD1	chr18:24081036:24081214:-@chr18:24056479:24056623:-@chr18:24039584:24039889:-	0.53	0.92	-0.39	6.43	0.39
SE	ENSG00000122335	SERAC1	chr6:158564088:158564216:-@chr6:158551405:158551518:-@chr6:158549140:158549302:-	0.55	0.94	-0.39	5.61	0.39
SE	ENSG00000159023	EPB41	chr1:29379616:29379824:+@chr1:29386934:29386996:+@chr1:29391494:29391670:+	0.55	0.93	-0.38	13393.3	0.38
SE	ENSG00000206149	HERC2P9	chr15:28878269:28878441:+@chr15:28878736:28878886:+@chr15:28881633:28881847:+	0.19	0.57	-0.38	29.79	0.38
SE	ENSG00000116285	ERRFI1	chr1:8075555:8075752:-@chr1:8075368:8075444:-@chr1:8071779:8074456:-	0.15	0.53	-0.38	28.55	0.38
SE	ENSG00000074054	CLASP1	chr2:122168442:122168545:-@chr2:122166600:122166623:-@chr2:122165047:122165291:-	0.32	0.7	-0.38	12.59	0.38
SE	ENSG00000139546	TARBP2	chr12:53894705:53895245:+@chr12:53896811:53896996:+@chr12:53897497:53897592:+	0.37	0.75	-0.38	5.11	0.38
SE	ENSG00000198000	NOL8	chr9:95083950:95084028:-@chr9:95082225:95082419:-@chr9:95081503:95081638:-	0.29	0.66	-0.37	2227.58	0.37
SE	NA	NA	chr11:70224136:70224301:+@chr11:70228194:70228264:+@chr11:70229109:70230607:+	0.58	0.95	-0.37	18.17	0.37
SE	ENSG00000011638	TMEM159	chr16:21169912:21170067:+@chr16:21172299:21172329:+@chr16:21172406:21172599:+	0.16	0.53	-0.37	9.61	0.37
SE	ENSG00000225484	RP11-773D16.1	chr10:81574369:81574472:-@chr10:81568519:81568719:-@chr10:81565795:81565878:-	0.18	0.55	-0.37	8.92	0.37
SE	ENSG00000154978	VOPP1	chr7:55588765:55588823:-@chr7:55565306:55565383:-@chr7:55559975:55560111:-	0.48	0.85	-0.37	8.68	0.37
SE	NA	NA	chr7:92199137:92199229:-@chr7:92195328:92195375:-@chr7:92190072:92191682:-	0.41	0.78	-0.37	7.99	0.37
SE	ENSG00000161010	C5orf45	chr5:179280197:179280276:-@chr5:179278243:179278424:-@chr5:179274978:179275066:-	0.21	0.58	-0.37	7.83	0.37
SE	NA	NA	chr3:10327432:10327537:+@chr3:10328972:10329127:+@chr3:10329629:10329786:+	0.14	0.51	-0.37	7.6	0.37
SE	ENSG00000132394	EEFSEC	chr3:127965679:127965886:+@chr3:127980971:127981067:+@chr3:128060076:128060732:+	0.57	0.94	-0.37	5.04	0.37
SE	ENSG00000134759	ELP2	chr18:33718233:33718389:+@chr18:33718758:33718835:+@chr18:33719382:33719576:+	0.59	0.96	-0.37	5.03	0.37
SE	ENSG00000135655	USP15	chr12:62719653:62719714:+@chr12:62743002:62743088:+@chr12:62749112:62749256:+	0.34	0.7	-0.36	6.98	0.36
SE	ENSG00000164073	MFSD8	chr4:128851838:128851972:-@chr4:128843015:128843118:-@chr4:128842679:128842926:-	0.54	0.9	-0.36	6.74	0.36
SE	ENSG00000092330	TINF2	chr14:24711347:24711880:-@chr14:24710881:24710982:-@chr14:24709625:24710081:-	0.43	0.79	-0.36	5.76	0.36
SE	NA	NA	chr14:50116983:50117159:-@chr14:50114011:50114078:-@chr14:50110270:50110388:-	0.15	0.51	-0.36	5.34	0.36
SE	ENSG00000166181	API5	chr11:43352058:43352114:+@chr11:43356828:43356904:+@chr11:43357408:43357544:+	0.15	0.5	-0.35	1000000000000	0.35
SE	ENSG00000196419,ENSG00000172346	XRCC6,CSDC2	chr22:42017994:42018090:+@chr22:42024122:42024234:+@chr22:42032117:42032255:+	0.59	0.94	-0.35	1000000000000	0.35
SE	ENSG00000060762	BRP44L	chr6:166796294:166796486:-@chr6:166782221:166782453:-@chr6:166780283:166780379:-	0.24	0.59	-0.35	1298.38	0.35
SE	ENSG00000140157	NIPA2	chr15:23034147:23034427:-@chr15:23033278:23033413:-@chr15:23021198:23021429:-	0.39	0.74	-0.35	159.62	0.35
SE	ENSG00000185480	PARPBP	chr12:102517664:102517819:+@chr12:102547647:102547754:+@chr12:102558216:102558386:+	0.58	0.93	-0.35	108.45	0.35
SE	ENSG00000159023	EPB41	chr1:29385101:29385157:+@chr1:29386934:29386996:+@chr1:29391494:29391670:+	0.61	0.96	-0.35	53.92	0.35
SE	NA	NA	chr13:21955573:21955688:-@chr13:21952800:21952877:-@chr13:21946710:21950794:-	0.12	0.47	-0.35	20.8	0.35
SE	ENSG00000251022,ENSG00000138674	RP11-163O17.1,SEC31A	chr4:83821230:83821376:-@chr4:83819142:83819215:-@chr4:83816845:83816927:-	0.41	0.76	-0.35	9.38	0.35
SE	ENSG00000196456	ZNF775	chr7:150102840:150102992:+@chr7:150104672:150105576:+@chr7:150107248:150109558:+	0.29	0.64	-0.35	8.01	0.35
SE	ENSG00000008838	MED24	chr17:38191169:38191225:-@chr17:38189896:38190024:-@chr17:38189598:38189709:-	0.2	0.55	-0.35	7.86	0.35
SE	NA	NA	chr2:24260547:24262382:-@chr2:24255699:24255816:-@chr2:24252206:24254032:-	0.55	0.9	-0.35	6.24	0.35
SE	ENSG00000205571	SMN2	chr5:69366468:69366578:+@chr5:69372348:69372401:+@chr5:69372846:69373422:+	0.11	0.45	-0.34	1000000000000	0.34
SE	ENSG00000198000	NOL8	chr9:95083950:95084028:-@chr9:95082225:95082661:-@chr9:95081503:95081638:-	0.48	0.82	-0.34	1.51263e+10	0.34
SE	ENSG00000141101	NOB1	chr16:69788497:69788629:-@chr16:69783462:69783533:-@chr16:69783116:69783241:-	0.52	0.85	-0.33	1340.1	0.33
SE	NA	NA	chr10:75910513:75910826:-@chr10:75898564:75898689:-@chr10:75897865:75898140:-	0.23	0.56	-0.33	58.34	0.33
SE	ENSG00000028310	BRD9	chr5:884053:884185:-@chr5:883466:883565:-@chr5:881222:881297:-	0.04	0.37	-0.33	17.24	0.33
SE	ENSG00000165304	MELK	chr9:36572859:36573004:+@chr9:36581641:36581736:+@chr9:36589533:36589649:+	0.59	0.92	-0.33	10.47	0.33
SE	ENSG00000081377	CDC14B	chr9:99284788:99284885:-@chr9:99271955:99272071:-@chr9:99262395:99266071:-	0.23	0.56	-0.33	7.8	0.33
SE	ENSG00000133794	ARNTL	chr11:13375848:13375995:+@chr11:13376773:13376843:+@chr11:13378286:13378324:+	0.14	0.47	-0.33	6.98	0.33
SE	ENSG00000225241	NBPF8	chr1:144615096:144615303:+@chr1:144617150:144617252:+@chr1:144618082:144618296:+	0.45	0.78	-0.33	6.15	0.33
SE	NA	NA	chr2:111141892:111142113:-@chr2:111140281:111141521:-@chr2:111132686:111134645:-	0.49	0.81	-0.32	1000000000000	0.32
SE	ENSG00000091409	ITGA6	chr2:173362703:173362828:+@chr2:173366500:173366629:+@chr2:173368819:173371181:+	0.07	0.39	-0.32	624973	0.32
SE	ENSG00000101166	SLMO2	chr20:57613521:57613689:-@chr20:57612246:57612335:-@chr20:57611745:57611815:-	0.66	0.98	-0.32	6006.49	0.32
SE	ENSG00000122779	TRIM24	chr7:138223402:138223548:+@chr7:138235808:138235925:+@chr7:138239443:138239609:+	0.65	0.97	-0.32	402.56	0.32
SE	ENSG00000204371	EHMT2	chr6:31857005:31857119:-@chr6:31856746:31856847:-@chr6:31856376:31856524:-	0.54	0.86	-0.32	21.28	0.32
SE	ENSG00000168137	SETD5	chr3:9476018:9476169:+@chr3:9476274:9476314:+@chr3:9476508:9476566:+	0.4	0.72	-0.32	17.19	0.32
SE	ENSG00000204536	CCHCR1	chr6:31125776:31125937:-@chr6:31125162:31125277:-@chr6:31124800:31124866:-	0.15	0.47	-0.32	12.69	0.32
SE	ENSG00000249624	AP000295.9	chr21:34624967:34625135:+@chr21:34640699:34640822:+@chr21:34648901:34649058:+	0.2	0.52	-0.32	12.62	0.32
SE	ENSG00000221838	AP4M1	chr7:99699503:99699591:+@chr7:99699869:99700016:+@chr7:99700298:99700404:+	0.18	0.5	-0.32	12.43	0.32
SE	ENSG00000039319	ZFYVE16	chr5:79741082:79741224:+@chr5:79743845:79744223:+@chr5:79745410:79745532:+	0.59	0.91	-0.32	7.03	0.32
SE	ENSG00000115514	TXNDC9	chr2:99949485:99949705:-@chr2:99943998:99944116:-@chr2:99938418:99938672:-	0.45	0.77	-0.32	6.81	0.32
SE	ENSG00000134262	AP4B1	chr1:114445260:114445484:-@chr1:114444377:114444507:-@chr1:114442526:114443022:-	0.29	0.61	-0.32	6.35	0.32
SE	ENSG00000117625	RCOR3	chr1:211477425:211477482:+@chr1:211485697:211485829:+@chr1:211486062:211486303:+	0.38	0.69	-0.31	841.14	0.31
SE	ENSG00000141569	TRIM65	chr17:73888348:73888581:-@chr17:73888092:73888266:-@chr17:73885041:73887428:-	0.52	0.83	-0.31	353.77	0.31
SE	ENSG00000178252	WDR6	chr3:49044637:49044964:+@chr3:49049068:49049174:+@chr3:49049455:49050347:+	0.39	0.7	-0.31	91.27	0.31
SE	NA	NA	chr3:155571012:155572248:-@chr3:155560221:155560408:-@chr3:155551646:155551830:-	0.45	0.76	-0.31	10.76	0.31
SE	ENSG00000081377	CDC14B	chr9:99277931:99278074:-@chr9:99271955:99272071:-@chr9:99262395:99266071:-	0.11	0.42	-0.31	10.61	0.31
SE	ENSG00000127586	CHTF18	chr16:841161:841370:+@chr16:842224:842367:+@chr16:842439:842590:+	0.4	0.71	-0.31	9.68	0.31
SE	ENSG00000176945	MUC20	chr3:195384910:195385036:+@chr3:195388627:195388712:+@chr3:195389442:195389604:+	0.66	0.97	-0.31	9.12	0.31
SE	ENSG00000105793	GTPBP10	chr7:89982130:89982323:+@chr7:89984400:89984544:+@chr7:90001469:90001542:+	0.33	0.64	-0.31	8.91	0.31
SE	ENSG00000178053	MLF1	chr3:158288953:158289180:+@chr3:158310223:158310370:+@chr3:158314651:158314734:+	0.44	0.75	-0.31	8.73	0.31
SE	ENSG00000110497	AMBRA1	chr11:46563495:46564531:-@chr11:46534277:46534363:-@chr11:46529741:46529920:-	0.45	0.76	-0.31	8.6	0.31
SE	ENSG00000135679	MDM2	chr12:69222551:69222711:+@chr12:69229609:69229764:+@chr12:69233054:69239212:+	0.52	0.83	-0.31	6.2	0.31
SE	ENSG00000242612,ENSG00000103202	DECR2,NME4	chr16:456346:456397:+@chr16:456685:456952:+@chr16:457425:457560:+	0.59	0.9	-0.31	5.5	0.31
SE	ENSG00000233184	RP11-421L21.3	chr1:101549017:101549130:+@chr1:101550608:101550713:+@chr1:101552408:101552819:+	0.12	0.43	-0.31	5.25	0.31
SE	ENSG00000180198	RCC1	chr1:28835342:28835417:+@chr1:28843237:28843379:+@chr1:28856370:28856451:+	0.62	0.92	-0.3	1.63739e+06	0.3
SE	ENSG00000138674	SEC31A	chr4:83821230:83821376:-@chr4:83816845:83816927:-@chr4:83814605:83816000:-	0.1	0.4	-0.3	216083	0.3
SE	ENSG00000024526	DEPDC1	chr1:68949633:68949773:-@chr1:68948324:68948580:-@chr1:68947123:68947295:-	0.33	0.63	-0.3	36398.5	0.3
SE	ENSG00000263070,ENSG00000166664	RP11-382B18.3,CHRFAM7A	chr15:30675522:30675585:-@chr15:30673906:30674079:-@chr15:30672556:30672602:-	0.66	0.96	-0.3	112.77	0.3
SE	ENSG00000131966	ACTR10	chr14:58690340:58690419:+@chr14:58697117:58697198:+@chr14:58698784:58698985:+	0.38	0.68	-0.3	36.99	0.3
SE	ENSG00000167264	DUS2L	chr16:68056847:68057254:+@chr16:68059284:68059397:+@chr16:68071909:68072052:+	0.34	0.64	-0.3	11.1	0.3
SE	ENSG00000136715	SAP130	chr2:128744359:128744536:-@chr2:128735559:128735663:-@chr2:128712560:128712918:-	0.41	0.71	-0.3	10.43	0.3
SE	ENSG00000057935	MTA3	chr2:42836598:42836724:+@chr2:42867313:42867376:+@chr2:42871267:42871384:+	0.67	0.97	-0.3	5.04	0.3
SE	ENSG00000013441	CLK1	chr2:201725961:201726189:-@chr2:201724848:201724938:-@chr2:201724403:201724469:-	0.51	0.8	-0.29	1000000000000	0.29
SE	ENSG00000162521	RBBP4	chr1:33117515:33117662:+@chr1:33133921:33133999:+@chr1:33134340:33134455:+	0.52	0.81	-0.29	1000000000000	0.29
SE	ENSG00000204152	TIMM23B	chr10:51371395:51371646:+@chr10:51374370:51374428:+@chr10:51381439:51381532:+	0.67	0.96	-0.29	1000000000000	0.29
SE	NA	NA	chr10:112631553:112631776:+@chr10:112635724:112635828:+@chr10:112640991:112641293:+	0.68	0.97	-0.29	1.94869e+11	0.29
SE	ENSG00000086232	EIF2AK1	chr7:6094177:6094335:-@chr7:6089543:6089676:-@chr7:6088438:6088475:-	0.53	0.82	-0.29	7764.63	0.29
SE	ENSG00000148399	WDR85	chr9:140471922:140472055:-@chr9:140470761:140470854:-@chr9:140470532:140470619:-	0.5	0.79	-0.29	227.37	0.29
SE	ENSG00000100744	C14orf129	chr14:96829863:96829905:+@chr14:96846025:96846125:+@chr14:96848584:96848842:+	0.06	0.35	-0.29	78.29	0.29
SE	ENSG00000138778	CENPE	chr4:104061413:104061571:-@chr4:104060946:104061236:-@chr4:104059508:104059606:-	0.32	0.61	-0.29	35.07	0.29
SE	ENSG00000182149	IST1	chr16:71957191:71957283:+@chr16:71957994:71958184:+@chr16:71958672:71958720:+	0.18	0.47	-0.29	34.06	0.29
SE	ENSG00000100109	TFIP11	chr22:26908065:26908141:-@chr22:26906583:26906658:-@chr22:26906030:26906247:-	0.66	0.95	-0.29	26.63	0.29
SE	ENSG00000085274	MYNN	chr3:169490853:169491250:+@chr3:169491819:169491885:+@chr3:169492053:169492349:+	0.32	0.61	-0.29	21.57	0.29
SE	ENSG00000151883	PARP8	chr5:50055477:50055566:+@chr5:50056126:50056196:+@chr5:50057655:50057732:+	0.66	0.95	-0.29	11.94	0.29
SE	ENSG00000148498	PARD3	chr10:34663802:34663930:-@chr10:34661426:34661464:-@chr10:34648999:34649187:-	0.2	0.49	-0.29	7.39	0.29
SE	ENSG00000072134	EPN2	chr17:19232874:19232960:+@chr17:19235166:19235381:+@chr17:19238718:19240027:+	0.48	0.76	-0.28	2752.2	0.28
SE	ENSG00000100084	HIRA	chr22:19340879:19341042:-@chr22:19338881:19338969:-@chr22:19318224:19319079:-	0.59	0.87	-0.28	14.27	0.28
SE	ENSG00000100744	C14orf129	chr14:96829863:96829905:+@chr14:96846025:96846092:+@chr14:96848584:96848842:+	0.12	0.4	-0.28	9.38	0.28
SE	ENSG00000174384,ENSG00000229018	RP11-313P13.4,RP11-313P13.3	chr7:72509966:72510052:+@chr7:72510219:72510331:+@chr7:72511686:72511869:+	0.25	0.53	-0.28	5.96	0.28
SE	NA	NA	chr9:32572879:32573182:-@chr9:32570958:32571050:-@chr9:32558908:32558952:-	0.51	0.78	-0.27	689912	0.27
SE	ENSG00000078304	PPP2R5C	chr14:102348498:102348608:+@chr14:102349594:102349686:+@chr14:102349769:102349899:+	0.71	0.98	-0.27	282.64	0.27
SE	ENSG00000105173	CCNE1	chr19:30312629:30312724:+@chr19:30312903:30313037:+@chr19:30313147:30313258:+	0.62	0.89	-0.27	24.71	0.27
SE	ENSG00000005483	MLL5	chr7:104654637:104654982:+@chr7:104678573:104678646:+@chr7:104681286:104681470:+	0.05	0.32	-0.27	20.57	0.27
SE	ENSG00000225210	AL589743.1	chr14:19650032:19650126:+@chr14:19655734:19655871:+@chr14:19656089:19656224:+	0.7	0.97	-0.27	18.55	0.27
SE	ENSG00000173209	AHSA2	chr2:61412637:61412753:+@chr2:61413115:61413216:+@chr2:61413581:61413632:+	0.17	0.44	-0.27	18.22	0.27
SE	ENSG00000042088	TDP1	chr14:90422246:90422314:+@chr14:90422922:90423144:+@chr14:90429452:90430017:+	0.42	0.69	-0.27	16.61	0.27
SE	ENSG00000100889	PCK2	chr14:24567684:24567887:+@chr14:24568258:24568456:+@chr14:24568767:24568929:+	0.45	0.72	-0.27	8.31	0.27
SE	ENSG00000072310	SREBF1	chr17:17721010:17721230:-@chr17:17720862:17720905:-@chr17:17720570:17720771:-	0.07	0.34	-0.27	6.3	0.27
SE	ENSG00000162521	RBBP4	chr1:33138392:33138502:+@chr1:33145241:33145418:+@chr1:33146127:33146258:+	0.72	0.98	-0.26	1000000000000	0.26
SE	ENSG00000187984	ANKRD19P	chr9:95588807:95588860:+@chr9:95591220:95591445:+@chr9:95599059:95600022:+	0.51	0.77	-0.26	3.20141e+06	0.26
SE	NA	NA	chr2:111141892:111142113:-@chr2:111135227:111135411:-@chr2:111132686:111134645:-	0.11	0.37	-0.26	49.64	0.26
SE	ENSG00000197965	MPZL1	chr1:167734820:167734986:+@chr1:167742473:167742605:+@chr1:167757057:167761156:+	0.25	0.51	-0.26	35.97	0.26
SE	NA	NA	chr1:104094343:104094414:+@chr1:104095896:104096306:+@chr1:104097656:104097859:+	0.33	0.59	-0.26	20.96	0.26
SE	ENSG00000111142	METAP2	chr12:95867822:95868106:+@chr12:95869919:95869954:+@chr12:95876991:95877056:+	0.27	0.53	-0.26	14.87	0.26
SE	ENSG00000144785	RP11-977G19.10	chr12:56708635:56708750:-@chr12:56693944:56694004:-@chr12:56680379:56680429:-	0.27	0.53	-0.26	9.88	0.26
SE	ENSG00000149187	CELF1	chr11:47493743:47493909:-@chr11:47493550:47493654:-@chr11:47491846:47492107:-	0.22	0.48	-0.26	9.27	0.26
SE	NA		chr5:73936132:73937249:-@chr5:73930509:73932187:-@chr5:73923231:73925817:-	0.54	0.8	-0.26	7.45	0.26
SE	NA	NA	chr17:59457867:59457932:+@chr17:59465979:59466069:+@chr17:59469338:59470199:+	0.19	0.45	-0.26	6.84	0.26
SE	ENSG00000145147	SLIT2	chr4:20525637:20525800:+@chr4:20526772:20526795:+@chr4:20530572:20530722:+	0.57	0.83	-0.26	6.19	0.26
SE	ENSG00000104368	PLAT	chr8:42045424:42045534:-@chr8:42042599:42042676:-@chr8:42040237:42040408:-	0.65	0.91	-0.26	6.18	0.26
SE	ENSG00000159593	NAE1	chr16:66864750:66864879:-@chr16:66857130:66857209:-@chr16:66855353:66855462:-	0.7	0.96	-0.26	5.11	0.26
SE	ENSG00000169045	HNRNPH1	chr5:179047893:179048036:-@chr5:179046270:179046361:-@chr5:179045146:179045324:-	0.58	0.83	-0.25	1000000000000	0.25
SE	ENSG00000197343	ZNF655	chr7:99158156:99158318:+@chr7:99159511:99160117:+@chr7:99161486:99162328:+	0.52	0.77	-0.25	34.02	0.25
SE	NA	NA	chr2:111140281:111141521:-@chr2:111135227:111135411:-@chr2:111132686:111134645:-	0.11	0.36	-0.25	11.93	0.25
SE	ENSG00000157985	AGAP1	chr2:236817382:236817550:+@chr2:236839409:236839567:+@chr2:236877106:236877267:+	0.25	0.5	-0.25	10.28	0.25
SE	ENSG00000090621	PABPC4	chr1:40030778:40031050:-@chr1:40030373:40030445:-@chr1:40030095:40030214:-	0.64	0.89	-0.25	10.11	0.25
SE	ENSG00000170364	SETMAR	chr3:4345297:4345552:+@chr3:4354582:4355445:+@chr3:4357896:4358949:+	0.46	0.71	-0.25	6.88	0.25
SE	ENSG00000163946	FAM208A	chr3:56661065:56661173:-@chr3:56658856:56659034:-@chr3:56658507:56658671:-	0.61	0.86	-0.25	6.47	0.25
SE	NA	NA	chr4:39046451:39046716:+@chr4:39064179:39064655:+@chr4:39077585:39077767:+	0.63	0.88	-0.25	6.36	0.25
SE	ENSG00000196912	ANKRD36B	chr2:98126044:98126196:-@chr2:98124458:98124528:-@chr2:98124027:98124120:-	0.68	0.93	-0.25	5.11	0.25
SE	ENSG00000135506	OS9	chr12:58112776:58112965:+@chr12:58113882:58114046:+@chr12:58114189:58114301:+	0.55	0.79	-0.24	1000000000000	0.24
SE	ENSG00000145425	RPS3A	chr4:152020725:152020866:+@chr4:152021637:152021740:+@chr4:152024023:152024231:+	0.24	0.48	-0.24	1000000000000	0.24
SE	ENSG00000100938	GMPR2	chr14:24702685:24702804:+@chr14:24704943:24705026:+@chr14:24705173:24705346:+	0.71	0.95	-0.24	1.48796e+06	0.24
SE	ENSG00000150433	TMEM218	chr11:124972630:124972705:-@chr11:124972028:124972247:-@chr11:124971097:124971199:-	0.74	0.98	-0.24	89.98	0.24
SE	ENSG00000147854	UHRF2	chr9:6493826:6493932:+@chr9:6495585:6497103:+@chr9:6497198:6497360:+	0.32	0.56	-0.24	39.87	0.24
SE	ENSG00000186866	POFUT2	chr21:46687505:46687628:-@chr21:46685937:46686142:-@chr21:46683843:46685550:-	0.2	0.44	-0.24	23.62	0.24
SE	ENSG00000119596	YLPM1	chr14:75282906:75282968:+@chr14:75283274:75283393:+@chr14:75283634:75283810:+	0.36	0.6	-0.24	12.85	0.24
SE	ENSG00000121073	SLC35B1	chr17:47785438:47785528:-@chr17:47784705:47784806:-@chr17:47784327:47784430:-	0.16	0.4	-0.24	8.83	0.24
SE	ENSG00000157593	SLC35B2	chr6:44225137:44225283:-@chr6:44224422:44224615:-@chr6:44221838:44223381:-	0.26	0.5	-0.24	5.78	0.24
SE	ENSG00000148187	MRRF	chr9:125033143:125033354:+@chr9:125042722:125042877:+@chr9:125047448:125047566:+	0.57	0.8	-0.23	27.64	0.23
SE	ENSG00000258780	RP11-492D6.2	chr15:20362943:20363123:+@chr15:20363370:20363428:+@chr15:20364397:20364501:+	0.03	0.26	-0.23	20.87	0.23
SE	ENSG00000143228	NUF2	chr1:163291723:163291856:+@chr1:163292657:163292885:+@chr1:163295822:163295964:+	0.07	0.3	-0.23	16.46	0.23
SE	ENSG00000115325	DOK1	chr2:74782702:74782795:+@chr2:74783021:74783205:+@chr2:74783435:74784678:+	0.65	0.88	-0.23	11.97	0.23
SE	ENSG00000244005,ENSG00000214078	NFS1,CPNE1	chr20:34252682:34252878:-@chr20:34246852:34246936:-@chr20:34220717:34220845:-	0.35	0.58	-0.23	7.73	0.23
SE	ENSG00000104529	EEF1D	chr8:144679518:144679845:-@chr8:144674817:144675063:-@chr8:144671161:144672251:-	0.19	0.42	-0.23	5.13	0.23
SE	ENSG00000024526	DEPDC1	chr1:68949633:68949773:-@chr1:68947729:68948580:-@chr1:68947123:68947295:-	0.66	0.88	-0.22	1000000000000	0.22
SE	ENSG00000150433	TMEM218	chr11:124972630:124972705:-@chr11:124972028:124972198:-@chr11:124971097:124971199:-	0.75	0.97	-0.22	16911.6	0.22
SE	ENSG00000160310	PRMT2	chr21:48069487:48069651:+@chr21:48081712:48081848:+@chr21:48083295:48083466:+	0.11	0.33	-0.22	52.57	0.22
SE	NA	NA	chr16:733167:733234:-@chr16:732953:733087:-@chr16:731667:732874:-	0.55	0.77	-0.22	38.96	0.22
SE	ENSG00000153037,ENSG00000258864	SRP19,CTC-554D6.1	chr5:112198205:112198280:+@chr5:112200131:112200225:+@chr5:112200318:112200429:+	0.47	0.69	-0.22	34.9	0.22
SE	ENSG00000148187	MRRF	chr9:125047448:125047566:+@chr9:125048318:125048445:+@chr9:125054028:125054119:+	0.13	0.35	-0.22	17.12	0.22
SE	ENSG00000169045	HNRNPH1	chr5:179050038:179050165:-@chr5:179048372:179048398:-@chr5:179047893:179048036:-	0.71	0.93	-0.22	17.08	0.22
SE	ENSG00000225241	NBPF8	chr1:144598512:144598780:+@chr1:144604410:144604508:+@chr1:144606369:144606510:+	0.2	0.42	-0.22	8.12	0.22
SE	ENSG00000185480	PARPBP	chr12:102517664:102517819:+@chr12:102542013:102542241:+@chr12:102547647:102547754:+	0.75	0.97	-0.22	6.98	0.22
SE	ENSG00000188243	COMMD6	chr13:76123459:76123575:-@chr13:76111635:76111811:-@chr13:76104250:76104402:-	0.27	0.49	-0.22	5.64	0.22
SE	ENSG00000162521	RBBP4	chr1:33117515:33117662:+@chr1:33133826:33133999:+@chr1:33134340:33134455:+	0.54	0.75	-0.21	1000000000000	0.21
SE	ENSG00000127314	RAP1B	chr12:69045775:69045831:+@chr12:69047892:69048032:+@chr12:69050086:69050229:+	0.75	0.96	-0.21	3.48925e+08	0.21
SE	ENSG00000150433	TMEM218	chr11:124972630:124972705:-@chr11:124972028:124972213:-@chr11:124971097:124971199:-	0.77	0.98	-0.21	166.1	0.21
SE	ENSG00000172661	FAM21C	chr10:46268704:46268806:+@chr10:46272721:46272873:+@chr10:46274401:46274583:+	0.72	0.93	-0.21	22.39	0.21
SE	ENSG00000102317	RBM3	chrX:48433556:48433671:+@chrX:48433949:48434018:+@chrX:48434702:48434807:+	0.64	0.85	-0.21	10.4	0.21
SE	ENSG00000172053	QARS	chr3:49142438:49142534:-@chr3:49142050:49142131:-@chr3:49141757:49141904:-	0.76	0.97	-0.21	7.96	0.21
SE	ENSG00000186522	2013-09-10	chr2:110350628:110350696:-@chr2:110332158:110332344:-@chr2:110325392:110325553:-	0.31	0.52	-0.21	5.52	0.21
SE	ENSG00000084207	GSTP1	chr11:67352609:67352712:+@chr11:67353575:67353682:+@chr11:67353860:67354124:+	0.76	0.96	-0.2	1000000000000	0.2
SE	ENSG00000170312	CDK1	chr10:62545422:62545545:+@chr10:62547818:62547988:+@chr10:62551648:62551811:+	0.77	0.97	-0.2	1000000000000	0.2
SE	ENSG00000126768	TIMM17B	chrX:48754042:48754141:-@chrX:48752635:48752784:-@chrX:48752321:48752384:-	0.17	0.37	-0.2	576995	0.2
SE	ENSG00000120948	TARDBP	chr1:11073773:11074022:+@chr1:11076901:11077064:+@chr1:11078790:11078930:+	0.73	0.93	-0.2	135.11	0.2
SE	ENSG00000143393	PI4KB	chr1:151299747:151300191:-@chr1:151298648:151298849:-@chr1:151288049:151288985:-	0.69	0.89	-0.2	132.69	0.2
SE	ENSG00000128595	CALU	chr7:128388627:128388858:+@chr7:128394583:128394776:+@chr7:128398925:128399091:+	0.47	0.67	-0.2	26.19	0.2
SE	ENSG00000104177	MYEF2	chr15:48445989:48446090:-@chr15:48444431:48444481:-@chr15:48444071:48444139:-	0.7	0.9	-0.2	22.03	0.2
SE	ENSG00000065548	ZC3H15	chr2:187366000:187366152:+@chr2:187367223:187367279:+@chr2:187368759:187368941:+	0.78	0.98	-0.2	12.82	0.2
SE	ENSG00000160310	PRMT2	chr21:48055507:48055675:+@chr21:48056351:48056459:+@chr21:48056808:48056902:+	0.37	0.57	-0.2	11.02	0.2
SE	ENSG00000173230	GOLGB1	chr3:121388059:121388202:-@chr3:121387161:121387355:-@chr3:121386908:121387005:-	0.09	0.29	-0.2	9.36	0.2
SE	NA	NA	chrX:119575585:119575749:-@chrX:119572931:119573148:-@chrX:119560003:119565317:-	0.6	0.79	-0.19	2807.62	0.19
SE	ENSG00000171720	HDAC3	chr5:141016115:141016197:-@chr5:141009251:141009692:-@chr5:141008740:141008873:-	0.68	0.87	-0.19	98.12	0.19
SE	ENSG00000143401	ANP32E	chr1:150198940:150199127:-@chr1:150195512:150195620:-@chr1:150190717:150193063:-	0.11	0.3	-0.19	19.97	0.19
SE	ENSG00000160439	RDH13	chr19:55559697:55559909:-@chr19:55559414:55559625:-@chr19:55558755:55558856:-	0.04	0.23	-0.19	13.08	0.19
SE	NA	NA	chr12:123011395:123011560:-@chr12:123006690:123006846:-@chr12:123005932:123005975:-	0.74	0.93	-0.19	11.36	0.19
SE	ENSG00000157306	RP11-66N24.4	chr14:24025198:24025552:+@chr14:24025952:24026248:+@chr14:24027904:24028790:+	0.72	0.91	-0.19	9.5	0.19
SE	ENSG00000214022,ENSG00000196456	REPIN1,ZNF775	chr7:150065879:150066030:+@chr7:150066760:150066957:+@chr7:150068317:150071133:+	0.31	0.5	-0.19	7.97	0.19
SE	ENSG00000172239	PAIP1	chr5:43543106:43543218:-@chr5:43539026:43539137:-@chr5:43536921:43537046:-	0.32	0.51	-0.19	5.45	0.19
SE	ENSG00000125458	NT5C	chr17:73127140:73127200:-@chr17:73126848:73126962:-@chr17:73126320:73126732:-	0.64	0.83	-0.19	5.32	0.19
SE	ENSG00000104408	EIF3E	chr8:109260842:109260959:-@chr8:109254028:109254142:-@chr8:109252187:109252304:-	0.8	0.98	-0.18	1000000000000	0.18
SE	ENSG00000145425	RPS3A	chr4:152020725:152020866:+@chr4:152021579:152021740:+@chr4:152024023:152024231:+	0.17	0.35	-0.18	1000000000000	0.18
SE	NA	NA	chr12:123011395:123011560:-@chr12:123006690:123006876:-@chr12:123005932:123005975:-	0.56	0.74	-0.18	40.53	0.18
SE	ENSG00000163029	SMC6	chr2:17896128:17896332:-@chr2:17894652:17894847:-@chr2:17889906:17890020:-	0.02	0.2	-0.18	21.7	0.18
SE	ENSG00000112983	BRD8	chr5:137495244:137495288:-@chr5:137493331:137493583:-@chr5:137492573:137492956:-	0.2	0.38	-0.18	12.42	0.18
SE	ENSG00000151353	TMEM18	chr2:677289:677439:-@chr2:675758:676238:-@chr2:675510:675630:-	0.36	0.54	-0.18	6.22	0.18
SE	ENSG00000155984	TMEM185A	chrX:148690314:148690521:-@chrX:148685653:148685736:-@chrX:148681967:148682143:-	0.8	0.98	-0.18	6.07	0.18
SE	ENSG00000072571	HMMR	chr5:162891729:162891808:+@chr5:162894707:162894754:+@chr5:162896647:162896835:+	0.19	0.36	-0.17	463167	0.17
SE	ENSG00000126768	TIMM17B	chrX:48754042:48754141:-@chrX:48752635:48753255:-@chrX:48752321:48752384:-	0.16	0.33	-0.17	10527.9	0.17
SE	ENSG00000138757	G3BP2	chr4:76580250:76580430:-@chr4:76579167:76579265:-@chr4:76573823:76573925:-	0.08	0.25	-0.17	55.64	0.17
SE	ENSG00000108312	UBTF	chr17:42286720:42286909:-@chr17:42285987:42286369:-@chr17:42285232:42285279:-	0.08	0.25	-0.17	10.48	0.17
SE	ENSG00000169371	SNUPN	chr15:75893479:75893559:-@chr15:75892978:75893231:-@chr15:75890424:75891022:-	0.09	0.26	-0.17	9.4	0.17
SE	ENSG00000008130	NADK	chr1:1688620:1688749:-@chr1:1688178:1688321:-@chr1:1687942:1688047:-	0.04	0.21	-0.17	7.48	0.17
SE	ENSG00000130921	C12orf65	chr12:123717844:123718078:+@chr12:123718287:123718471:+@chr12:123738194:123738503:+	0.09	0.26	-0.17	5.25	0.17
SE	ENSG00000140988	RPS2	chr16:2014450:2014629:-@chr16:2014277:2014366:-@chr16:2013150:2013257:-	0.25	0.41	-0.16	1000000000000	0.16
SE	ENSG00000242114,ENSG00000100330	MTFP1,MTMR3	chr22:30822705:30822832:+@chr22:30823158:30823390:+@chr22:30824449:30825041:+	0.79	0.95	-0.16	1063.29	0.16
SE	ENSG00000131446	MGAT1	chr5:180242414:180242541:-@chr5:180235648:180236076:-@chr5:180217541:180220097:-	0.23	0.39	-0.16	159.13	0.16
SE	ENSG00000141542	RAB40B	chr17:80656331:80656598:-@chr17:80654265:80654729:-@chr17:80622372:80622432:-	0.63	0.79	-0.16	30.25	0.16
SE	ENSG00000101365	IDH3B	chr20:2640171:2640231:-@chr20:2639405:2639483:-@chr20:2639041:2639168:-	0.62	0.78	-0.16	28.65	0.16
SE	ENSG00000170791	CHCHD7	chr8:57124315:57124396:+@chr8:57125321:57125468:+@chr8:57127157:57127226:+	0.44	0.6	-0.16	19.19	0.16
SE	ENSG00000171603	CLSTN1	chr1:9801152:9801314:-@chr1:9797556:9797612:-@chr1:9795943:9796100:-	0.79	0.95	-0.16	7.08	0.16
SE	ENSG00000157306	RP11-66N24.4	chr14:24025198:24025552:+@chr14:24025952:24026243:+@chr14:24027904:24028790:+	0.73	0.89	-0.16	6.27	0.16
SE	ENSG00000214022,ENSG00000196456	REPIN1,ZNF775	chr7:150065915:150066122:+@chr7:150066760:150066957:+@chr7:150068317:150071133:+	0.24	0.4	-0.16	6	0.16
SE	NA	NA	chr1:231376919:231377202:+@chr1:231386707:231386889:+@chr1:231396253:231396429:+	0.25	0.41	-0.16	5.91	0.16
SE	ENSG00000063046	EIF4B	chr12:53416277:53416411:+@chr12:53419011:53419129:+@chr12:53421566:53421703:+	0.01	0.16	-0.15	1000000000000	0.15
SE	ENSG00000123562	MORF4L2	chrX:102939609:102939657:-@chrX:102933427:102933579:-@chrX:102930426:102931979:-	0.78	0.93	-0.15	1000000000000	0.15
SE	ENSG00000178802	MPI	chr15:75188493:75188666:+@chr15:75189352:75189560:+@chr15:75189853:75190565:+	0.77	0.92	-0.15	5.00261e+08	0.15
SE	NA	NA	chr10:73975758:73975830:+@chr10:73983646:73983814:+@chr10:73990124:73990198:+	0.82	0.97	-0.15	172370	0.15
SE	ENSG00000150093	ITGB1	chr10:33224420:33224486:-@chr10:33222279:33222511:-@chr10:33221443:33221528:-	0.03	0.18	-0.15	22671.7	0.15
SE	ENSG00000123159	GIPC1	chr19:14606849:14606944:-@chr19:14593501:14593818:-@chr19:14591405:14591590:-	0.55	0.7	-0.15	25.5	0.15
SE	NA	NA	chr1:23670704:23670853:-@chr1:23667345:23667513:-@chr1:23664983:23665101:-	0.47	0.62	-0.15	20.98	0.15
SE	ENSG00000118495	PLAGL1	chr6:144285924:144285955:-@chr6:144269122:144269597:-@chr6:144261437:144263800:-	0.38	0.53	-0.15	13.3	0.15
SE	ENSG00000087302	C14orf166	chr14:52458035:52458159:+@chr14:52460441:52460540:+@chr14:52465212:52465298:+	0.84	0.99	-0.15	9.77	0.15
SE	ENSG00000182199	SHMT2	chr12:57625994:57626075:+@chr12:57626266:57626358:+@chr12:57626487:57626626:+	0.82	0.97	-0.15	8.55	0.15
SE	ENSG00000118495	PLAGL1	chr6:144281606:144281679:-@chr6:144269122:144269597:-@chr6:144261437:144263800:-	0.38	0.53	-0.15	8.45	0.15
SE	NA	NA	chr11:71948168:71948840:+@chr11:71949086:71949219:+@chr11:71949307:71950188:+	0.8	0.95	-0.15	7.6	0.15
SE	ENSG00000123562	MORF4L2	chrX:102940099:102940188:-@chrX:102933427:102933579:-@chrX:102930426:102931979:-	0.78	0.92	-0.14	1000000000000	0.14
SE	ENSG00000147403	RPL10	chrX:153627679:153627737:+@chrX:153627828:153627935:+@chrX:153628144:153628282:+	0.75	0.89	-0.14	1000000000000	0.14
SE	ENSG00000123562	MORF4L2	chrX:102939609:102939657:-@chrX:102933427:102933548:-@chrX:102930426:102931979:-	0.84	0.98	-0.14	2.35749e+10	0.14
SE	ENSG00000123562	MORF4L2	chrX:102940099:102940188:-@chrX:102933427:102933577:-@chrX:102930426:102931979:-	0.75	0.89	-0.14	2329.42	0.14
SE	ENSG00000167978	SRRM2	chr16:2811562:2818262:+@chr16:2818506:2818600:+@chr16:2818998:2819285:+	0.11	0.25	-0.14	712.94	0.14
SE	ENSG00000183765	CHEK2	chr22:29095826:29095925:-@chr22:29092889:29092975:-@chr22:29091698:29091861:-	0.8	0.94	-0.14	518.97	0.14
SE	ENSG00000264772	RP11-186B7.4	chr17:7481145:7481234:+@chr17:7481545:7481562:+@chr17:7481660:7482324:+	0.27	0.41	-0.14	37.96	0.14
SE	ENSG00000143228	NUF2	chr1:163291723:163292002:+@chr1:163292657:163292885:+@chr1:163295822:163295964:+	0.04	0.18	-0.14	36.31	0.14
SE	ENSG00000131446	MGAT1	chr5:180242414:180242541:-@chr5:180235648:180236066:-@chr5:180217541:180220097:-	0.22	0.36	-0.14	27.06	0.14
SE	ENSG00000109971	HSPA8	chr11:122931828:122932037:-@chr11:122931301:122931383:-@chr11:122930824:122930976:-	0.82	0.96	-0.14	14.99	0.14
SE	ENSG00000104529	EEF1D	chr8:144678258:144678924:-@chr8:144671161:144672251:-@chr8:144668899:144669022:-	0.52	0.66	-0.14	7.89	0.14
SE	ENSG00000131778	CHD1L	chr1:146731491:146731572:+@chr1:146736081:146736243:+@chr1:146737591:146737746:+	0.85	0.99	-0.14	7.67	0.14
SE	ENSG00000161010	C5orf45	chr5:179280378:179280437:-@chr5:179278243:179278424:-@chr5:179274978:179275066:-	0.06	0.2	-0.14	6.91	0.14
SE	ENSG00000244687,ENSG00000124208	UBE2V1,TMEM189-UBE2V1	chr20:48713209:48713357:-@chr20:48700666:48700791:-@chr20:48697661:48699451:-	0.8	0.94	-0.14	5.97	0.14
SE	ENSG00000119487	MAPKAP1	chr9:128305338:128305447:-@chr9:128268589:128268696:-@chr9:128246722:128246862:-	0.45	0.59	-0.14	5.85	0.14
SE	ENSG00000111142	METAP2	chr12:95867822:95868106:+@chr12:95869850:95869954:+@chr12:95876991:95877056:+	0.84	0.98	-0.14	5.25	0.14
SE	ENSG00000134419	RPS15A	chr16:18800303:18800440:-@chr16:18799385:18799481:-@chr16:18796060:18796145:-	0.82	0.95	-0.13	1000000000000	0.13
SE	ENSG00000160200	CBS	chr21:44488619:44488725:-@chr21:44487888:44488070:-@chr21:44486353:44486487:-	0.12	0.25	-0.13	1000000000000	0.13
SE	ENSG00000110958	PTGES3	chr12:57064059:57064148:-@chr12:57059416:57060050:-@chr12:57058560:57058584:-	0.63	0.76	-0.13	3.22297e+11	0.13
SE	ENSG00000104529	EEF1D	chr8:144679518:144679845:-@chr8:144671161:144672251:-@chr8:144668899:144669022:-	0.29	0.42	-0.13	205111	0.13
SE	ENSG00000230798	RP4-792G4.2	chr1:63787987:63788129:-@chr1:63787336:63787751:-@chr1:63787038:63787134:-	0.86	0.99	-0.13	275.54	0.13
SE	ENSG00000115486	GGCX	chr2:85788509:85788657:-@chr2:85787938:85788108:-@chr2:85786040:85786198:-	0.84	0.97	-0.13	157.59	0.13
SE	ENSG00000164548	TRA2A	chr7:23571408:23571656:-@chr7:23561740:23562051:-@chr7:23561326:23561459:-	0.23	0.36	-0.13	31.58	0.13
SE	ENSG00000164548	TRA2A	chr7:23571408:23571656:-@chr7:23561751:23562051:-@chr7:23561326:23561459:-	0.23	0.36	-0.13	30.81	0.13
SE	ENSG00000126768	TIMM17B	chrX:48754042:48754141:-@chrX:48752635:48752737:-@chrX:48752321:48752384:-	0.11	0.24	-0.13	22.76	0.13
SE	ENSG00000174915	PTDSS2	chr11:450280:450637:+@chr11:451352:451493:+@chr11:460187:460288:+	0.02	0.15	-0.13	20.07	0.13
SE	ENSG00000063241	ISOC2	chr19:55967716:55967856:-@chr19:55967003:55967212:-@chr19:55966627:55966697:-	0.84	0.97	-0.13	13.75	0.13
SE	ENSG00000167863	ATP5H	chr17:73038276:73038372:-@chr17:73036187:73036258:-@chr17:73035304:73035366:-	0.79	0.92	-0.13	11.07	0.13
SE	ENSG00000183506	PI4KAP2	chr22:21832079:21832204:-@chr22:21830933:21831053:-@chr22:21830291:21830449:-	0.76	0.89	-0.13	11.06	0.13
SE	ENSG00000153914	SREK1	chr5:65449291:65449424:+@chr5:65451893:65454760:+@chr5:65455047:65455162:+	0.67	0.8	-0.13	7.73	0.13
SE	ENSG00000175166,ENSG00000145191	PSMD2,EIF2B5	chr3:184019325:184019446:+@chr3:184019646:184019859:+@chr3:184020158:184020316:+	0.83	0.96	-0.13	6.11	0.13
SE	ENSG00000104885	DOT1L	chr19:2226182:2227126:+@chr19:2227736:2228381:+@chr19:2229784:2232577:+	0.2	0.33	-0.13	5.11	0.13
SE	ENSG00000196924	FLNA	chrX:153581140:153581292:-@chrX:153580921:153581043:-@chrX:153580549:153580815:-	0.86	0.98	-0.12	9.56821e+07	0.12
SE	ENSG00000065911	MTHFD2	chr2:74432832:74433016:+@chr2:74434831:74434953:+@chr2:74435696:74435848:+	0.88	1	-0.12	6601.7	0.12
SE	ENSG00000108848	LUC7L3	chr17:48823903:48824063:+@chr17:48827862:48828002:+@chr17:48828108:48828213:+	0.71	0.83	-0.12	357.87	0.12
SE	ENSG00000104529	EEF1D	chr8:144676063:144676241:-@chr8:144674817:144675063:-@chr8:144668899:144669022:-	0.04	0.16	-0.12	234.89	0.12
SE	ENSG00000112167	SAYSD1	chr6:39082659:39082865:-@chr6:39077090:39081496:-@chr6:39071840:39073552:-	0.35	0.47	-0.12	35.71	0.12
SE	ENSG00000128595	CALU	chr7:128394316:128394509:+@chr7:128394583:128394776:+@chr7:128398925:128399091:+	0.23	0.35	-0.12	23.53	0.12
SE	ENSG00000136932	C9orf156	chr9:100675683:100675840:-@chr9:100673200:100675257:-@chr9:100672242:100672898:-	0.05	0.17	-0.12	15.91	0.12
SE	ENSG00000116754	SRSF11	chr1:70694105:70694238:+@chr1:70696778:70696886:+@chr1:70697951:70698060:+	0.19	0.31	-0.12	12.22	0.12
SE	ENSG00000154305,ENSG00000244697	MIA3,RP11-378J18.5	chr1:222835595:222835674:+@chr1:222836230:222836373:+@chr1:222837340:222837490:+	0.03	0.15	-0.12	7.48	0.12
SE	ENSG00000162813	BPNT1	chr1:220263028:220263191:-@chr1:220253069:220253196:-@chr1:220247309:220247413:-	0.84	0.96	-0.12	7.04	0.12
SE	ENSG00000173801	JUP	chr17:39942840:39942964:-@chr17:39929070:39929178:-@chr17:39927899:39928114:-	0.03	0.15	-0.12	6.29	0.12
SE	ENSG00000214765	SEPT7P2	chr7:45776386:45776509:-@chr7:45768431:45768625:-@chr7:45767777:45767912:-	0.06	0.18	-0.12	5.32	0.12
SE	ENSG00000138668	HNRNPD	chr4:83277949:83278048:-@chr4:83277690:83277836:-@chr4:83276457:83276554:-	0.62	0.73	-0.11	1000000000000	0.11
SE	ENSG00000149925	ALDOA	chr16:30075745:30075826:+@chr16:30077197:30077248:+@chr16:30078555:30078687:+	0.29	0.4	-0.11	1000000000000	0.11
SE	ENSG00000169592	INO80E	chr16:30012250:30012361:+@chr16:30012533:30015978:+@chr16:30016542:30017112:+	0.46	0.57	-0.11	1000000000000	0.11
SE	ENSG00000205581	HMGN1	chr21:40720218:40720265:-@chr21:40717756:40719218:-@chr21:40717072:40717200:-	0.5	0.61	-0.11	1000000000000	0.11
SE	ENSG00000123562	MORF4L2	chrX:102940099:102940188:-@chrX:102933427:102933548:-@chrX:102930426:102931979:-	0.82	0.93	-0.11	3.31509e+07	0.11
SE	ENSG00000106603	C7orf44	chr7:43769028:43769083:-@chr7:43705257:43705321:-@chr7:43688199:43688251:-	0.04	0.15	-0.11	81.73	0.11
SE	ENSG00000125863	MKKS	chr20:10401176:10401406:-@chr20:10393178:10394579:-@chr20:10389276:10389451:-	0.55	0.66	-0.11	60.24	0.11
SE	ENSG00000101365	IDH3B	chr20:2640171:2640231:-@chr20:2639284:2639483:-@chr20:2639041:2639168:-	0.79	0.9	-0.11	28.83	0.11
SE	ENSG00000102317	RBM3	chrX:48433556:48433671:+@chrX:48433949:48434471:+@chrX:48434702:48434807:+	0.52	0.63	-0.11	16.84	0.11
SE	NA	NA	chr1:203830727:203830871:+@chr1:203831310:203831350:+@chr1:203832791:203832853:+	0.12	0.23	-0.11	16.04	0.11
SE	ENSG00000104529	EEF1D	chr8:144674817:144675063:-@chr8:144671161:144672251:-@chr8:144668899:144669022:-	0.41	0.52	-0.11	6.68	0.11
SE	ENSG00000156599	ZDHHC5	chr11:57435474:57435659:+@chr11:57439493:57440666:+@chr11:57455980:57456137:+	0.83	0.94	-0.11	6.52	0.11
SE	ENSG00000117500	TMED5	chr1:93621857:93622040:-@chr1:93621593:93621641:-@chr1:93615299:93620445:-	0.03	0.14	-0.11	6.27	0.11
SE	ENSG00000132600	PRMT7	chr16:68344953:68345014:+@chr16:68345945:68346079:+@chr16:68349800:68349977:+	0.02	0.13	-0.11	5.63	0.11
SE	ENSG00000149658	YTHDF1	chr20:61845216:61845295:-@chr20:61833639:61835159:-@chr20:61826782:61828086:-	0.89	0.99	-0.1	2.90502e+09	0.1
SE	ENSG00000160194	NDUFV3	chr21:44317037:44317157:+@chr21:44323292:44324386:+@chr21:44328974:44329773:+	0.34	0.44	-0.1	5021.41	0.1
SE	ENSG00000161010	C5orf45	chr5:179280378:179280437:-@chr5:179278243:179278337:-@chr5:179274978:179275066:-	0.04	0.14	-0.1	5.11	0.1
SE	ENSG00000168958	MFF	chr2:228205008:228205096:+@chr2:228211942:228212100:+@chr2:228220393:228220477:+	0.86	0.76	0.1	14.66	0.1
SE	ENSG00000174915	PTDSS2	chr11:460187:460288:+@chr11:473895:473977:+@chr11:479085:479152:+	0.98	0.88	0.1	9.37	0.1
SE	ENSG00000104408	EIF3E	chr8:109260842:109260959:-@chr8:109254341:109254575:-@chr8:109254028:109254142:-	0.17	0.07	0.1	6.66	0.1
SE	ENSG00000162735	PEX19	chr1:160254845:160254941:-@chr1:160253320:160253429:-@chr1:160252734:160252899:-	0.98	0.88	0.1	5.34	0.1
SE	ENSG00000089157	RPLP0	chr12:120636921:120637008:-@chr12:120636657:120636803:-@chr12:120636357:120636542:-	0.75	0.64	0.11	1000000000000	0.11
SE	ENSG00000101220	C20orf27	chr20:3736116:3736254:-@chr20:3734913:3735166:-@chr20:3734155:3734805:-	0.35	0.24	0.11	16.22	0.11
SE	NA	NA	chr13:28194880:28195277:+@chr13:28195474:28196146:+@chr13:28222516:28222590:+	0.74	0.62	0.12	20.19	0.12
SE	NA	NA	chr14:20923290:20923553:+@chr14:20923737:20923932:+@chr14:20924073:20924260:+	0.97	0.85	0.12	18.51	0.12
SE	NA	NA	chr17:34842473:34842629:+@chr17:34842779:34842810:+@chr17:34848657:34848743:+	0.93	0.81	0.12	13.54	0.12
SE	ENSG00000010244	ZNF207	chr17:30692349:30692506:+@chr17:30693684:30693776:+@chr17:30694791:30695033:+	0.3	0.18	0.12	9.31	0.12
SE	ENSG00000143774	GUK1	chr1:228335316:228335400:+@chr1:228336072:228336240:+@chr1:228336366:228336655:+	0.55	0.43	0.12	8.5	0.12
SE	ENSG00000169241	SLC50A1	chr1:155108775:155108852:+@chr1:155110037:155110198:+@chr1:155110455:155110574:+	0.95	0.83	0.12	5.25	0.12
SE	ENSG00000152795	HNRPDL	chr4:83347190:83347282:-@chr4:83346716:83346820:-@chr4:83343717:83346036:-	0.32	0.19	0.13	15757.1	0.13
SE	ENSG00000131876	SNRPA1	chr15:101827113:101827215:-@chr15:101826419:101826498:-@chr15:101825931:101826006:-	0.17	0.04	0.13	1675.79	0.13
SE	ENSG00000178035	IMPDH2	chr3:49065864:49065965:-@chr3:49065632:49065755:-@chr3:49065143:49065349:-	0.7	0.57	0.13	240.71	0.13
SE	ENSG00000172062	SMN1	chr5:70241893:70242003:+@chr5:70247768:70247821:+@chr5:70248266:70248842:+	0.67	0.54	0.13	64.36	0.13
SE	ENSG00000165525	NEMF	chr14:50266193:50266242:-@chr14:50262951:50263046:-@chr14:50262509:50262662:-	0.16	0.03	0.13	22.53	0.13
SE	ENSG00000120306	CYSTM1	chr5:139554653:139554870:+@chr5:139574031:139574237:+@chr5:139622890:139623048:+	0.99	0.86	0.13	21.5	0.13
SE	ENSG00000154380	ENAH	chr1:225706900:225707267:-@chr1:225704898:225705692:-@chr1:225702298:225702602:-	0.59	0.46	0.13	18.75	0.13
SE	NA	NA	chr17:76210761:76210870:+@chr17:76212745:76212862:+@chr17:76219546:76221716:+	0.85	0.72	0.13	17.9	0.13
SE	NA	NA	chr17:5329556:5329619:+@chr17:5331391:5331531:+@chr17:5335862:5336340:+	0.6	0.47	0.13	7.9	0.13
SE	ENSG00000141552	ANAPC11	chr17:79849599:79849709:+@chr17:79851428:79851490:+@chr17:79852343:79852462:+	0.75	0.62	0.13	6.3	0.13
SE	ENSG00000136240,ENSG00000164535	KDELR2,DAGLB	chr7:6509227:6509385:-@chr7:6505702:6505954:-@chr7:6500712:6502806:-	0.94	0.81	0.13	6.18	0.13
SE	ENSG00000178053	MLF1	chr3:158288953:158289136:+@chr3:158306641:158306713:+@chr3:158310223:158310370:+	0.15	0.02	0.13	5.22	0.13
SE	ENSG00000127952	STYXL1	chr7:75651169:75651310:-@chr7:75643060:75643205:-@chr7:75634577:75634722:-	0.97	0.84	0.13	5.07	0.13
SE	ENSG00000149503	INCENP	chr11:61908385:61908516:+@chr11:61908972:61908983:+@chr11:61912454:61912563:+	0.17	0.03	0.14	11.91	0.14
SE	ENSG00000070371	CLTCL1	chr22:19175493:19175603:-@chr22:19175070:19175240:-@chr22:19170903:19171124:-	0.98	0.84	0.14	6.7	0.14
SE	ENSG00000128463	EMC4	chr15:34519894:34520047:+@chr15:34520630:34520790:+@chr15:34521954:34522357:+	0.82	0.67	0.15	34.11	0.15
SE	ENSG00000049541	RFC2	chr7:73664069:73664110:-@chr7:73663342:73663448:-@chr7:73657476:73657576:-	0.96	0.81	0.15	11.91	0.15
SE	ENSG00000177830	CHID1	chr11:910775:910874:-@chr11:908542:908645:-@chr11:904706:904859:-	0.32	0.17	0.15	8.42	0.15
SE	ENSG00000089597	GANAB	chr11:62414034:62414104:-@chr11:62407402:62407538:-@chr11:62407099:62407203:-	0.22	0.07	0.15	7.64	0.15
SE	ENSG00000169246	NPIPL3	chr16:21436300:21436457:-@chr16:21430811:21431087:-@chr16:21426278:21426406:-	0.93	0.78	0.15	6.53	0.15
SE	ENSG00000144199	FAHD2B	chr2:97760438:97760619:-@chr2:97757199:97757449:-@chr2:97755846:97756062:-	0.96	0.81	0.15	5.84	0.15
SE	ENSG00000126457	PRMT1	chr19:50180409:50180573:+@chr19:50183129:50183182:+@chr19:50183744:50183845:+	0.41	0.26	0.15	5.35	0.15
SE	ENSG00000156411	C14orf2	chr14:104381403:104381526:-@chr14:104380816:104380970:-@chr14:104380298:104380321:-	0.26	0.1	0.16	1000000000000	0.16
SE	NA	NA	chr1:154192818:154193273:-@chr1:154192312:154192413:-@chr1:154186933:154187050:-	0.68	0.52	0.16	4.84786e+11	0.16
SE	NA	NA	chr17:57208642:57208728:-@chr17:57196680:57196856:-@chr17:57187308:57189706:-	0.82	0.66	0.16	744.14	0.16
SE	ENSG00000198064,ENSG00000183604	RP11-347C12.1,RP11-347C12.2	chr16:30256775:30256932:-@chr16:30251287:30251563:-@chr16:30246772:30246900:-	0.94	0.78	0.16	28.21	0.16
SE	ENSG00000128463	EMC4	chr15:34519894:34520047:+@chr15:34520638:34520790:+@chr15:34521954:34522357:+	0.68	0.52	0.16	15.96	0.16
SE	ENSG00000155366,ENSG00000155367	RHOC,PPM1J	chr1:113249700:113250025:-@chr1:113247675:113247790:-@chr1:113246266:113246428:-	0.24	0.08	0.16	7.07	0.16
SE	ENSG00000176261	ZBTB8OS	chr1:33116030:33116155:-@chr1:33100303:33100393:-@chr1:33099552:33099673:-	0.27	0.1	0.17	13.14	0.17
SE	ENSG00000214413	BBIP1	chr10:112661296:112661370:-@chr10:112660784:112660880:-@chr10:112658488:112660284:-	0.26	0.09	0.17	6.87	0.17
SE	ENSG00000243716	RP11-368J21.2	chr16:22525085:22525242:+@chr16:22530459:22530735:+@chr16:22535141:22535269:+	0.93	0.76	0.17	6.87	0.17
SE	ENSG00000142192	APP	chr21:27394156:27394358:-@chr21:27369675:27369731:-@chr21:27354657:27354790:-	0.6	0.43	0.17	5.65	0.17
SE	NA	NA	chr13:50243913:50243982:-@chr13:50237193:50237313:-@chr13:50234810:50235344:-	0.83	0.65	0.18	45.35	0.18
SE	NA	NA	chr17:57232492:57232800:-@chr17:57196660:57196856:-@chr17:57187308:57189706:-	0.68	0.49	0.19	24.04	0.19
SE	ENSG00000071994	PDCD2	chr6:170892145:170892276:-@chr6:170889090:170889193:-@chr6:170887945:170888058:-	0.94	0.75	0.19	6.6	0.19
SE	ENSG00000057608	GDI2	chr10:5838726:5838825:-@chr10:5836848:5836952:-@chr10:5827815:5828013:-	0.93	0.73	0.2	25.7	0.2
SE	ENSG00000169045	HNRNPH1	chr5:179044515:179044650:-@chr5:179044052:179044111:-@chr5:179043870:179043959:-	1	0.79	0.21	1000000000000	0.21
SE	NA	NA	chr13:50243913:50243982:-@chr13:50237193:50237331:-@chr13:50234810:50235344:-	0.88	0.67	0.21	88091.8	0.21
SE	NA	NA	chr17:57208642:57208728:-@chr17:57196660:57196856:-@chr17:57187308:57189706:-	0.67	0.46	0.21	21863.3	0.21
SE	ENSG00000165501	LRR1	chr14:50069088:50069186:+@chr14:50074118:50074839:+@chr14:50080974:50081390:+	0.54	0.33	0.21	18638.6	0.21
SE	ENSG00000136861	CDK5RAP2	chr9:123220728:123220900:-@chr9:123215734:123216151:-@chr9:123210173:123210404:-	0.87	0.66	0.21	7.89	0.21
SE	ENSG00000011426	ANLN	chr7:36455367:36455493:+@chr7:36456689:36456799:+@chr7:36458853:36459088:+	0.89	0.67	0.22	177.37	0.22
SE	ENSG00000116754	SRSF11	chr1:70694105:70694238:+@chr1:70696240:70696301:+@chr1:70696778:70697511:+	0.42	0.2	0.22	8.78	0.22
SE	ENSG00000109180	OCIAD1	chr4:48833060:48833266:+@chr4:48834637:48834778:+@chr4:48835418:48835498:+	0.93	0.71	0.22	8.27	0.22
SE	ENSG00000022267	FHL1	chrX:135289951:135290120:+@chrX:135290614:135290800:+@chrX:135292030:135293518:+	0.96	0.73	0.23	627834	0.23
SE	ENSG00000225210	AL589743.1	chr14:19650032:19650126:+@chr14:19656089:19656224:+@chr14:19680595:19680685:+	0.5	0.27	0.23	18.54	0.23
SE	ENSG00000113240	CLK4	chr5:178050257:178050417:-@chr5:178046839:178046897:-@chr5:178045557:178045779:-	0.29	0.06	0.23	16.94	0.23
SE	ENSG00000168803	ADAL	chr15:43638052:43638178:+@chr15:43639214:43639294:+@chr15:43641105:43641243:+	0.89	0.66	0.23	8.5	0.23
SE	ENSG00000221926	TRIM16	chr17:15562116:15562190:-@chr17:15554405:15555260:-@chr17:15546035:15546130:-	0.88	0.65	0.23	5.7	0.23
SE	ENSG00000063601	MTMR1	chrX:149919202:149919315:+@chrX:149919502:149919712:+@chrX:149924161:149924337:+	0.38	0.14	0.24	39.35	0.24
SE	ENSG00000123219	CENPK	chr5:64847391:64847463:-@chr5:64846933:64847069:-@chr5:64838629:64838675:-	0.47	0.23	0.24	8.4	0.24
SE	ENSG00000258466	RP11-1012A1.4	chr14:68151732:68151921:-@chr14:68129746:68129907:-@chr14:68129194:68129252:-	0.44	0.2	0.24	5.61	0.24
SE	NA	NA	chr9:101983829:101984246:-@chr9:101983261:101983419:-@chr9:101978707:101981118:-	0.81	0.56	0.25	8.59	0.25
SE	ENSG00000112282	MED23	chr6:131937047:131937142:-@chr6:131936464:131936481:-@chr6:131931186:131931386:-	0.3	0.05	0.25	7.44	0.25
SE	ENSG00000125871	C20orf72	chr20:17950444:17951013:+@chr20:17968809:17968941:+@chr20:17970582:17971762:+	0.73	0.48	0.25	6.16	0.25
SE	ENSG00000167695	FAM57A	chr17:641086:641287:+@chr17:643745:643840:+@chr17:644541:646075:+	0.97	0.72	0.25	5.54	0.25
SE	ENSG00000137575	SDCBP	chr8:59465728:59465862:+@chr8:59472843:59474354:+@chr8:59477578:59477643:+	0.83	0.57	0.26	96.88	0.26
SE	ENSG00000136699	SMPD4	chr2:130921947:130922018:-@chr2:130918759:130918845:-@chr2:130914824:130914969:-	0.34	0.08	0.26	13.77	0.26
SE	ENSG00000133612	AGAP3	chr7:150831487:150831655:+@chr7:150835230:150835400:+@chr7:150837066:150837203:+	0.94	0.68	0.26	13.22	0.26
SE	ENSG00000184863	RBM33	chr7:155473284:155473602:+@chr7:155477627:155477746:+@chr7:155493467:155493638:+	0.35	0.08	0.27	35.52	0.27
SE	ENSG00000093144	ECHDC1	chr6:127648147:127648289:-@chr6:127637595:127637647:-@chr6:127635961:127636041:-	0.9	0.63	0.27	18.44	0.27
SE	NA	NA	chr12:69050086:69050229:+@chr12:69050881:69050997:+@chr12:69053060:69054385:+	0.72	0.45	0.27	16.29	0.27
SE	ENSG00000112812	PRSS16	chr6:27220587:27220728:+@chr6:27222472:27222651:+@chr6:27222765:27222910:+	0.84	0.57	0.27	5.9	0.27
SE	ENSG00000139436	GIT2	chr12:110385061:110385309:-@chr12:110383065:110383154:-@chr12:110376970:110377052:-	0.94	0.66	0.28	6.09	0.28
SE	ENSG00000260083	MIR4519	chr16:30887233:30887439:+@chr16:30900035:30900279:+@chr16:30905869:30906541:+	0.93	0.64	0.29	17.94	0.29
SE	NA	NA	chr16:81124206:81124285:-@chr16:81118068:81118199:-@chr16:81115552:81116568:-	0.81	0.52	0.29	17.41	0.29
SE	ENSG00000157954	WIPI2	chr7:5229835:5230124:+@chr7:5232749:5232802:+@chr7:5239207:5239289:+	0.72	0.43	0.29	6.28	0.29
SE	ENSG00000049541	RFC2	chr7:73664069:73664110:-@chr7:73663342:73663550:-@chr7:73657476:73657576:-	0.73	0.43	0.3	192454	0.3
SE	ENSG00000111846	GCNT2	chr6:10527707:10527893:+@chr6:10528864:10530069:+@chr6:10621584:10621676:+	0.92	0.62	0.3	16.43	0.3
SE	ENSG00000132541	HRSP12	chr8:99129260:99129418:-@chr8:99120874:99120941:-@chr8:99118500:99118554:-	0.61	0.31	0.3	6.12	0.3
SE	ENSG00000224450	AC073135.6	chr3:197913320:197913385:+@chr3:197915543:197915601:+@chr3:197916708:197917237:+	0.35	0.04	0.31	6.99	0.31
SE	ENSG00000172785	CBWD1	chr9:178816:179075:-@chr9:177723:177820:-@chr9:175698:175784:-	0.45	0.13	0.32	1000000000000	0.32
SE	ENSG00000086666	ZFAND6	chr15:80365608:80365672:+@chr15:80390758:80390920:+@chr15:80412670:80412840:+	0.87	0.55	0.32	9.53	0.32
SE	ENSG00000182718	ANXA2	chr15:60690142:60690185:-@chr15:60689457:60689537:-@chr15:60656628:60656722:-	0.81	0.49	0.32	8.17	0.32
SE	ENSG00000113648	H2AFY	chr5:134696187:134696297:-@chr5:134686513:134686603:-@chr5:134681658:134681747:-	0.47	0.14	0.33	3.74965e+08	0.33
SE	ENSG00000075292	ZNF638	chr2:71653590:71654544:+@chr2:71655677:71655781:+@chr2:71658457:71658558:+	0.95	0.62	0.33	116.74	0.33
SE	ENSG00000164111	ANXA5	chr4:122617736:122617779:-@chr4:122607443:122607527:-@chr4:122604519:122604632:-	0.87	0.54	0.33	46.45	0.33
SE	ENSG00000181264	TMEM136	chr11:120195838:120196077:+@chr11:120197831:120198349:+@chr11:120200686:120204388:+	0.93	0.6	0.33	46.03	0.33
SE	ENSG00000182165	TP53TG1	chr7:86974621:86974831:-@chr7:86974359:86974549:-@chr7:86970839:86971000:-	0.84	0.51	0.33	33.01	0.33
SE	NA	NA	chr15:90233808:90234015:-@chr15:90229662:90229777:-@chr15:90224762:90227179:-	0.88	0.55	0.33	6.29	0.33
SE	ENSG00000132591	ERAL1	chr17:27185392:27185504:+@chr17:27185594:27185651:+@chr17:27185982:27186131:+	0.92	0.58	0.34	103.94	0.34
SE	ENSG00000075292	ZNF638	chr2:71653590:71654544:+@chr2:71655661:71655781:+@chr2:71658457:71658558:+	0.71	0.37	0.34	15.49	0.34
SE	ENSG00000253729	PRKDC	chr8:48690247:48690435:-@chr8:48689405:48689544:-@chr8:48685669:48686938:-	0.98	0.63	0.35	1000000000000	0.35
SE	ENSG00000215067	MIR497HG	chr17:6915515:6915653:-@chr17:6913115:6913208:-@chr17:6905803:6905939:-	0.89	0.54	0.35	10.85	0.35
SE	ENSG00000198752	CDC42BPB	chr14:103420939:103421025:-@chr14:103420535:103420612:-@chr14:103418835:103418940:-	0.59	0.24	0.35	7.15	0.35
SE	NA	NA	chr16:67212102:67212407:-@chr16:67211913:67212010:-@chr16:67209505:67210878:-	0.88	0.53	0.35	6.96	0.35
SE	ENSG00000143207	RFWD2	chr1:176118142:176118210:-@chr1:176105624:176105683:-@chr1:176104146:176104222:-	0.91	0.56	0.35	5.96	0.35
SE	ENSG00000158062	UBXN11	chr1:26628185:26628213:-@chr1:26627417:26627544:-@chr1:26624453:26624553:-	0.66	0.3	0.36	5.47	0.36
SE	ENSG00000058272	PPP1R12A	chr12:80201006:80201110:-@chr12:80199946:80200077:-@chr12:80199372:80199548:-	0.74	0.37	0.37	1235.52	0.37
SE	ENSG00000087191	PSMC5	chr17:61904770:61904874:+@chr17:61905189:61905283:+@chr17:61905479:61905569:+	0.47	0.1	0.37	9.12	0.37
SE	ENSG00000232559	GS1-124K5.12	chr7:66057244:66057371:-@chr7:66053499:66053567:-@chr7:66041742:66041919:-	0.46	0.09	0.37	7.9	0.37
SE	ENSG00000186106	ANKRD46	chr8:101571939:101572012:-@chr8:101566807:101566945:-@chr8:101545437:101545539:-	0.42	0.04	0.38	1448.53	0.38
SE	ENSG00000154553	PDLIM3	chr4:186435424:186435491:-@chr4:186429453:186429716:-@chr4:186427676:186427806:-	0.47	0.09	0.38	11	0.38
SE	NA	NA	chr16:67212102:67212407:-@chr16:67211913:67212000:-@chr16:67209505:67210878:-	0.69	0.31	0.38	6.24	0.38
SE	ENSG00000186625	KATNA1	chr6:149944239:149944419:-@chr6:149924404:149924509:-@chr6:149922730:149922888:-	0.77	0.38	0.39	461.57	0.39
SE	ENSG00000183506	PI4KAP2	chr22:21830291:21830449:-@chr22:21829500:21829589:-@chr22:21828886:21829089:-	0.95	0.56	0.39	96.71	0.39
SE	ENSG00000185499	MUC1	chr1:155161974:155162101:-@chr1:155160804:155160979:-@chr1:155160639:155160688:-	0.89	0.5	0.39	5.37	0.39
SE	ENSG00000205581	HMGN1	chr21:40720218:40720265:-@chr21:40719305:40719404:-@chr21:40717756:40717884:-	0.75	0.35	0.4	2.41006e+10	0.4
SE	ENSG00000164830	OXR1	chr8:107726051:107726213:+@chr8:107749748:107749828:+@chr8:107751686:107751811:+	0.9	0.5	0.4	20.4	0.4
SE	ENSG00000145736	GTF2H2	chr5:70363123:70363475:-@chr5:70360952:70361049:-@chr5:70358535:70358623:-	0.83	0.43	0.4	11.14	0.4
SE	ENSG00000165490	C11orf82	chr11:82639819:82639980:+@chr11:82641199:82641316:+@chr11:82642774:82645699:+	0.9	0.5	0.4	8.23	0.4
SE	NA	NA	chr15:84898604:84898920:-@chr15:84873983:84874071:-@chr15:84873539:84873727:-	0.78	0.37	0.41	7.88	0.41
SE	ENSG00000186314	PRELID2	chr5:145214740:145214899:-@chr5:145205561:145205763:-@chr5:145202640:145202697:-	0.77	0.36	0.41	5.03	0.41
SE	ENSG00000175575	PAAF1	chr11:73620444:73620638:+@chr11:73625458:73625549:+@chr11:73627590:73627705:+	0.89	0.47	0.42	111.66	0.42
SE	ENSG00000124067	SLC12A4	chr16:68002342:68002597:-@chr16:67996147:67997462:-@chr16:67995478:67995609:-	0.83	0.41	0.42	21.9	0.42
SE	ENSG00000069424	KCNAB2	chr1:6052358:6052848:+@chr1:6078695:6078895:+@chr1:6100577:6100705:+	0.78	0.36	0.42	10.52	0.42
SE	ENSG00000110841	PPFIBP1	chr12:27829361:27829532:+@chr12:27829997:27830029:+@chr12:27832422:27832572:+	0.56	0.14	0.42	8.64	0.42
SE	ENSG00000104529	EEF1D	chr8:144674817:144675063:-@chr8:144672815:144672905:-@chr8:144671161:144672251:-	0.52	0.1	0.42	7.42	0.42
SE	ENSG00000205581	HMGN1	chr21:40720218:40720265:-@chr21:40719305:40719409:-@chr21:40717756:40717884:-	0.77	0.34	0.43	1000000000000	0.43
SE	ENSG00000004700	RECQL	chr12:21654397:21654603:-@chr12:21654104:21654149:-@chr12:21652489:21652549:-	0.83	0.4	0.43	5.39	0.43
SE	ENSG00000183506	PI4KAP2	chr22:21830291:21830449:-@chr22:21829500:21829589:-@chr22:21828886:21828969:-	0.86	0.42	0.44	8.54822e+07	0.44
SE	ENSG00000172661	FAM21C	chr10:46252460:46252587:+@chr10:46254763:46254849:+@chr10:46258836:46258937:+	0.88	0.44	0.44	7.52	0.44
SE	ENSG00000104529	EEF1D	chr8:144674817:144675063:-@chr8:144672815:144672908:-@chr8:144671161:144672251:-	0.54	0.1	0.44	6.29	0.44
SE	ENSG00000078618	NRD1	chr1:52305898:52306186:-@chr1:52303159:52303292:-@chr1:52302041:52302110:-	0.83	0.38	0.45	241286	0.45
SE	ENSG00000102032	RENBP	chrX:153208307:153208531:-@chrX:153207403:153207484:-@chrX:153206931:153207106:-	0.91	0.46	0.45	18.78	0.45
SE	ENSG00000153310	FAM49B	chr8:130983189:130983241:-@chr8:130924716:130924761:-@chr8:130915558:130915596:-	0.56	0.11	0.45	6.1	0.45
SE	ENSG00000102908	NFAT5	chr16:69725652:69728142:+@chr16:69729039:69729282:+@chr16:69730263:69738569:+	0.88	0.42	0.46	19.79	0.46
SE	ENSG00000125388	GRK4	chr4:3030928:3031136:+@chr4:3037113:3037250:+@chr4:3039101:3039238:+	0.73	0.27	0.46	8.37	0.46
SE	ENSG00000109180	OCIAD1	chr4:48833026:48833069:+@chr4:48833244:48833266:+@chr4:48834637:48834699:+	0.81	0.34	0.47	16.93	0.47
SE	ENSG00000260128	ULK4P2	chr15:30871491:30871615:+@chr15:30875097:30875160:+@chr15:30878081:30878127:+	0.74	0.26	0.48	12.75	0.48
SE	ENSG00000117620	SLC35A3	chr1:100435345:100435718:+@chr1:100440527:100440625:+@chr1:100459093:100459297:+	0.77	0.29	0.48	6.61	0.48
SE	ENSG00000129534	MIS18BP1	chr14:45722238:45722605:-@chr14:45719234:45719341:-@chr14:45715946:45716580:-	0.69	0.21	0.48	5.29	0.48
SE	NA	NA	chr3:113003629:113003705:+@chr3:113004286:113004412:+@chr3:113005522:113006305:+	0.63	0.14	0.49	57.66	0.49
SE	ENSG00000106346	USP42	chr7:6150756:6151005:+@chr7:6151428:6151582:+@chr7:6154954:6155154:+	0.64	0.15	0.49	39.61	0.49
SE	ENSG00000145348	TBCK	chr4:107181594:107181667:-@chr4:107176104:107176204:-@chr4:107173023:107173164:-	0.58	0.09	0.49	30.38	0.49
SE	ENSG00000104447	TRPS1	chr8:116680772:116681228:-@chr8:116635828:116635985:-@chr8:116631359:116632287:-	0.68	0.19	0.49	7.67	0.49
SE	ENSG00000135740	SLC9A5	chr16:67293723:67293849:+@chr16:67296115:67296192:+@chr16:67298255:67298425:+	0.58	0.08	0.5	131265	0.5
SE	ENSG00000188234	AGAP4	chr10:46339774:46339842:-@chr10:46337101:46337135:-@chr10:46329464:46329564:-	0.61	0.11	0.5	5.66	0.5
SE	NA	NA	chrX:80457303:80457744:+@chrX:80457936:80458075:+@chrX:80492617:80492779:+	0.76	0.25	0.51	8.59	0.51
SE	ENSG00000173531	MST1	chr3:49724989:49725101:-@chr3:49724797:49724942:-@chr3:49724582:49724718:-	0.79	0.28	0.51	6.11	0.51
SE	ENSG00000068745	IP6K2	chr3:48754590:48754920:-@chr3:48753865:48753910:-@chr3:48752748:48752960:-	0.58	0.06	0.52	18.94	0.52
SE	ENSG00000225697	SLC26A6	chr3:48670407:48670517:-@chr3:48669678:48669770:-@chr3:48669313:48669477:-	0.7	0.18	0.52	8.78	0.52
SE	ENSG00000160712	IL6R	chr1:154422387:154422456:+@chr1:154426964:154427057:+@chr1:154437610:154441926:+	0.73	0.21	0.52	6.94	0.52
SE	ENSG00000104447	TRPS1	chr8:116680101:116680234:-@chr8:116635842:116635985:-@chr8:116631359:116632287:-	0.8	0.28	0.52	5.79	0.52
SE	ENSG00000090612	ZNF268	chr12:133758532:133758616:+@chr12:133764451:133764658:+@chr12:133778730:133783697:+	0.86	0.33	0.53	6.65	0.53
SE	ENSG00000172954	LCLAT1	chr2:30670123:30670270:+@chr2:30682418:30682588:+@chr2:30748453:30748621:+	0.68	0.15	0.53	6.42	0.53
SE	ENSG00000139178	C1RL	chr12:7254494:7254683:-@chr12:7252497:7252622:-@chr12:7252282:7252356:-	0.88	0.35	0.53	6.07	0.53
SE	ENSG00000204120	GIGYF2	chr2:233589284:233589401:+@chr2:233595832:233595944:+@chr2:233599865:233599948:+	0.78	0.25	0.53	5.61	0.53
SE	ENSG00000167695	FAM57A	chr17:636338:636421:+@chr17:643745:643840:+@chr17:644541:646075:+	0.66	0.12	0.54	1.85921e+10	0.54
SE	ENSG00000085117	CD82	chr11:44639712:44639915:+@chr11:44640190:44640273:+@chr11:44640599:44641315:+	0.88	0.34	0.54	9.46	0.54
SE	ENSG00000142856	ITGB3BP	chr1:63988800:63988944:-@chr1:63975736:63975852:-@chr1:63974199:63974241:-	0.61	0.06	0.55	1000000000000	0.55
SE	ENSG00000125354	2013-09-06	chrX:118763281:118763471:-@chrX:118752676:118752749:-@chrX:118749688:118750705:-	0.75	0.2	0.55	399.33	0.55
SE	ENSG00000114346	ECT2	chr3:172468475:172468647:+@chr3:172469940:172470226:+@chr3:172472299:172472450:+	0.79	0.24	0.55	32.5	0.55
SE	ENSG00000213762	ZNF134	chr19:58125830:58125871:+@chr19:58130780:58130876:+@chr19:58131528:58133636:+	0.74	0.19	0.55	10.96	0.55
SE	ENSG00000263070,ENSG00000166664	RP11-382B18.3,CHRFAM7A	chr15:30679066:30679190:-@chr15:30675522:30675585:-@chr15:30672556:30672602:-	0.79	0.24	0.55	10.19	0.55
SE	ENSG00000175449	RFESD	chr5:94987841:94988035:+@chr5:94988821:94988918:+@chr5:94989765:94989940:+	0.68	0.13	0.55	7.96	0.55
SE	ENSG00000114346	ECT2	chr3:172468475:172468647:+@chr3:172469940:172470262:+@chr3:172472299:172472450:+	0.79	0.23	0.56	15.6	0.56
SE	ENSG00000245937	CTC-228N24.3	chr5:127418662:127418766:-@chr5:127398062:127398192:-@chr5:127396836:127396936:-	0.68	0.12	0.56	6.62	0.56
SE	ENSG00000169045	HNRNPH1	chr5:179044515:179044650:-@chr5:179044061:179044111:-@chr5:179043870:179043959:-	0.99	0.42	0.57	1000000000000	0.57
SE	ENSG00000114346	ECT2	chr3:172468475:172468647:+@chr3:172469940:172470062:+@chr3:172472299:172472450:+	0.69	0.12	0.57	20.57	0.57
SE	ENSG00000177565	TBL1XR1	chr3:176797615:176797733:-@chr3:176796420:176796566:-@chr3:176782708:176782810:-	0.83	0.26	0.57	14.72	0.57
SE	ENSG00000105339	DENND3	chr8:142154247:142154358:+@chr8:142160385:142160447:+@chr8:142160933:142161052:+	0.74	0.17	0.57	7.89	0.57
SE	ENSG00000165028	NIPSNAP3B	chr9:107531144:107531302:+@chr9:107533130:107533279:+@chr9:107535103:107535189:+	0.71	0.13	0.58	16.53	0.58
SE	ENSG00000185379	RAD51D	chr17:33446130:33446191:-@chr17:33445520:33445638:-@chr17:33443878:33444056:-	0.9	0.32	0.58	9.22	0.58
SE	ENSG00000090054	SPTLC1	chr9:94877596:94877690:-@chr9:94877204:94877348:-@chr9:94874737:94874844:-	0.76	0.17	0.59	21.21	0.59
SE	ENSG00000173531	MST1	chr3:49724989:49725101:-@chr3:49724797:49724911:-@chr3:49724582:49724718:-	0.81	0.22	0.59	18.12	0.59
SE	ENSG00000129455	KLK8	chr19:51504354:51504431:-@chr19:51501007:51501140:-@chr19:51499264:51499470:-	0.77	0.18	0.59	10.41	0.59
SE	ENSG00000138658	C4orf21	chr4:113553086:113553166:-@chr4:113550915:113551171:-@chr4:113544973:113545032:-	0.83	0.2	0.63	5971.18	0.63
SE	ENSG00000137876	RSL24D1	chr15:55488551:55488844:-@chr15:55486494:55486557:-@chr15:55484918:55485031:-	0.74	0.1	0.64	7.82	0.64
SE	ENSG00000136682	CBWD2	chr2:114195268:114195599:+@chr2:114196597:114196694:+@chr2:114198928:114199014:+	0.81	0.13	0.68	1000000000000	0.68
RI	ENSG00000241852	C8orf58	chr8:22459485:22459593:+@chr8:22459713:22459825:+	0.15	0.69	-0.54	135.49	0.54
RI	ENSG00000007384	RHBDF1	chr16:115037:114697:-@chr16:113920:113585:-	0.24	0.73	-0.49	7.48	0.49
RI	ENSG00000167733,ENSG00000130255	HSD11B1L,RPL36	chr19:5684830:5684916:+@chr19:5685000:5685130:+	0.43	0.89	-0.46	5.75	0.46
RI	ENSG00000103034	NDRG4	chr16:58537702:58537861:+@chr16:58538058:58538178:+	0.34	0.77	-0.43	6.17	0.43
RI	ENSG00000135596	MICAL1	chr6:109773604:109773449:-@chr6:109772903:109772803:-	0.49	0.87	-0.38	37665.6	0.38
RI	ENSG00000167778	SPRYD3	chr12:53469003:53468879:-@chr12:53468568:53468433:-	0.22	0.59	-0.37	7.59	0.37
RI	ENSG00000172932	ANKRD13D	chr11:67066529:67066595:+@chr11:67067001:67067082:+	0.55	0.9	-0.35	822.89	0.35
RI	ENSG00000007384	RHBDF1	chr16:115037:114697:-@chr16:113798:113585:-	0.13	0.48	-0.35	36.46	0.35
RI	ENSG00000130714	POMT1	chr9:134385290:134385449:+@chr9:134385647:134385802:+	0.44	0.76	-0.32	50.12	0.32
RI	ENSG00000058453	CROCC	chr1:17270595:17270777:+@chr1:17271957:17272101:+	0.29	0.61	-0.32	29.36	0.32
RI	ENSG00000103034	NDRG4	chr16:58537702:58537807:+@chr16:58538058:58538178:+	0.22	0.54	-0.32	9.52	0.32
RI	ENSG00000177731	FLII	chr17:18149376:18149152:-@chr17:18148974:18148869:-	0.64	0.95	-0.31	1000000000000	0.31
RI	ENSG00000162004	CCDC78	chr16:773936:773857:-@chr16:773161:772922:-	0.58	0.88	-0.3	5.62	0.3
RI	ENSG00000162191	UBXN1	chr11:62445304:62445212:-@chr11:62445106:62444990:-	0.22	0.5	-0.28	5.09	0.28
RI	ENSG00000213930,ENSG00000258728	GALT,RP11-195F19.29	chr9:34648331:34648453:+@chr9:34648759:34648891:+	0.54	0.81	-0.27	66748.7	0.27
RI	ENSG00000124357	NAGK	chr2:71302685:71302772:+@chr2:71303734:71303831:+	0.44	0.71	-0.27	1451.5	0.27
RI	ENSG00000143499	SMYD2	chr1:214504293:214504413:+@chr1:214505361:214507651:+	0.21	0.48	-0.27	437.27	0.27
RI	ENSG00000198830	HMGN2	chr1:26799974:26800018:+@chr1:26800194:26800223:+	0.34	0.61	-0.27	49.56	0.27
RI	ENSG00000151092	NGLY1	chr3:25778946:25778825:-@chr3:25777891:25777800:-	0.33	0.6	-0.27	5.57	0.27
RI	ENSG00000058673	ZC3H11A	chr1:203770703:203770756:+@chr1:203771780:203772144:+	0.44	0.69	-0.25	1000000000000	0.25
RI	ENSG00000100395	L3MBTL2	chr22:41613127:41613206:+@chr22:41615423:41615540:+	0.26	0.49	-0.23	24.88	0.23
RI	ENSG00000100462	PRMT5	chr14:23397824:23397706:-@chr14:23397450:23397335:-	0.33	0.56	-0.23	10.31	0.23
RI	ENSG00000127054	CPSF3L	chr1:1248504:1248415:-@chr1:1248329:1247973:-	0.18	0.4	-0.22	64.52	0.22
RI	ENSG00000069493	CLEC2D	chr12:9845424:9845527:+@chr12:9846421:9846544:+	0.72	0.94	-0.22	7.07	0.22
RI	ENSG00000127980	PEX1	chr7:92123710:92123607:-@chr7:92122443:92122267:-	0.52	0.74	-0.22	6.33	0.22
RI	ENSG00000178605	GTPBP6	chrX:229591:229433:-@chrX:228294:228086:-	0.59	0.8	-0.21	1000000000000	0.21
RI	ENSG00000177731	FLII	chr17:18149376:18149248:-@chr17:18148974:18148869:-	0.45	0.66	-0.21	4.21832e+06	0.21
RI	ENSG00000141279	NPEPPS	chr17:45656756:45656821:+@chr17:45660108:45660215:+	0.48	0.69	-0.21	55.87	0.21
RI	ENSG00000007372	PAX6	chr11:31823324:31823109:-@chr11:31822404:31822239:-	0.13	0.34	-0.21	19.25	0.21
RI	ENSG00000152076	CCDC74B	chr2:130900886:130900842:-@chr2:130899954:130899706:-	0.67	0.88	-0.21	6.24	0.21
RI	ENSG00000119760	SUPT7L	chr2:27885148:27885046:-@chr2:27884255:27883851:-	0.32	0.52	-0.2	1000000000000	0.2
RI	ENSG00000159140	SON	chr21:34921782:34923595:+@chr21:34924554:34927697:+	0.4	0.6	-0.2	1000000000000	0.2
RI	ENSG00000198830	HMGN2	chr1:26799974:26800018:+@chr1:26800194:26800626:+	0.29	0.49	-0.2	79.97	0.2
RI	ENSG00000165792	METTL17	chr14:21462959:21463060:+@chr14:21463324:21463392:+	0.41	0.61	-0.2	55.52	0.2
RI	ENSG00000185122	HSF1	chr8:145537509:145537574:+@chr8:145537648:145537717:+	0.07	0.27	-0.2	18.76	0.2
RI	ENSG00000007372	PAX6	chr11:31823324:31823310:-@chr11:31822404:31822239:-	0.51	0.71	-0.2	5.11	0.2
RI	ENSG00000182944	EWSR1	chr22:29684595:29684775:+@chr22:29687551:29687588:+	0.47	0.66	-0.19	1000000000000	0.19
RI	ENSG00000182944	EWSR1	chr22:29684595:29684775:+@chr22:29687554:29687588:+	0.47	0.66	-0.19	1000000000000	0.19
RI	ENSG00000110888	CAPRIN2	chr12:30869610:30869442:-@chr12:30868075:30867893:-	0.59	0.78	-0.19	11.06	0.19
RI	ENSG00000197948,ENSG00000120318	FCHSD1,ARAP3	chr5:141026289:141026170:-@chr5:141025758:141025654:-	0.63	0.82	-0.19	5.56	0.19
RI	ENSG00000185627	PSMD13	chr11:244041:244216:+@chr11:244426:244469:+	0.03	0.21	-0.18	1000000000000	0.18
RI	ENSG00000241973	PI4KA	chr22:21067678:21067569:-@chr22:21067085:21066981:-	0.29	0.47	-0.18	1153.27	0.18
RI	ENSG00000164548	TRA2A	chr7:23562051:23561973:-@chr7:23561459:23561326:-	0.62	0.8	-0.18	18.1	0.18
RI	ENSG00000197114	ZGPAT	chr20:62364939:62365064:+@chr20:62365997:62366176:+	0.77	0.95	-0.18	7.96	0.18
RI	ENSG00000141279	NPEPPS	chr17:45656756:45656877:+@chr17:45660108:45660215:+	0.37	0.54	-0.17	23.74	0.17
RI	ENSG00000165359	DDX26B	chrX:134703262:134703356:+@chrX:134706740:134706958:+	0.65	0.82	-0.17	10.76	0.17
RI	ENSG00000255717	SNHG1	chr11:62622688:62622605:-@chr11:62622410:62622360:-	0.5	0.67	-0.17	10.23	0.17
RI	ENSG00000154545	MAGED4	chrX:51934527:51934825:+@chrX:51934940:51934957:+	0.68	0.85	-0.17	7.01	0.17
RI	ENSG00000149100	EIF3M	chr11:32615412:32615495:+@chr11:32616460:32616559:+	0.2	0.36	-0.16	1000000000000	0.16
RI	ENSG00000106591	MRPL32	chr7:42974554:42974735:+@chr7:42976763:42976840:+	0.32	0.48	-0.16	18247.1	0.16
RI	ENSG00000174093	RP11-1407O15.2	chr17:36365176:36365111:-@chr17:36361804:36361697:-	0.66	0.82	-0.16	71.36	0.16
RI	ENSG00000119509	INVS	chr9:103054608:103054718:+@chr9:103055229:103055325:+	0.81	0.97	-0.16	58.02	0.16
RI	ENSG00000110330	BIRC2	chr11:102219329:102219495:+@chr11:102220609:102221480:+	0.34	0.5	-0.16	53.09	0.16
RI	ENSG00000166484	MAPK7	chr17:19283921:19284999:+@chr17:19285094:19285779:+	0.12	0.28	-0.16	11.17	0.16
RI	ENSG00000187243	MAGED4B	chrX:51805760:51805462:-@chrX:51805347:51805318:-	0.71	0.87	-0.16	9.55	0.16
RI	ENSG00000141002	TCF25	chr16:89970526:89970613:+@chr16:89971346:89971504:+	0.36	0.52	-0.16	6.93	0.16
RI	ENSG00000162772	ATF3	chr1:212788360:212788387:+@chr1:212788494:212788603:+	0.81	0.97	-0.16	6.85	0.16
RI	ENSG00000003509	C2orf56	chr2:37468721:37468934:+@chr2:37469778:37469836:+	0.36	0.52	-0.16	6.64	0.16
RI	ENSG00000119723	COQ6	chr14:74426118:74426225:+@chr14:74427876:74428078:+	0.16	0.29	-0.13	34.09	0.13
RI	ENSG00000099949	LZTR1	chr22:21350252:21350401:+@chr22:21350985:21351090:+	0.15	0.28	-0.13	7.45	0.13
RI	ENSG00000123737	EXOSC9	chr4:122735021:122735202:+@chr4:122737524:122737602:+	0.67	0.79	-0.12	355553	0.12
RI	ENSG00000117335	CD46	chr1:207940358:207940540:+@chr1:207943666:207943707:+	0.71	0.83	-0.12	12092.9	0.12
RI	ENSG00000089737	DDX24	chr14:94524243:94524168:-@chr14:94521530:94521342:-	0.49	0.61	-0.12	629.76	0.12
RI	ENSG00000234741	GAS5	chr1:173834685:173834648:-@chr1:173834420:173834367:-	0.7	0.82	-0.12	78.24	0.12
RI	ENSG00000221978	CCNL2	chr1:1328183:1328170:-@chr1:1326955:1326146:-	0.52	0.63	-0.11	914.6	0.11
RI	ENSG00000132424	PNISR	chr6:99852578:99852479:-@chr6:99851758:99851705:-	0.72	0.83	-0.11	20.45	0.11
RI	ENSG00000060138	CSDA	chr12:10865932:10865810:-@chr12:10862713:10862507:-	0.33	0.43	-0.1	1000000000000	0.1
RI	ENSG00000134884	ARGLU1	chr13:107212005:107211780:-@chr13:107209479:107209396:-	0.84	0.94	-0.1	1000000000000	0.1
RI	ENSG00000166165	CKB	chr14:103988842:103988775:-@chr14:103988514:103988360:-	0.75	0.85	-0.1	3.81344e+08	0.1
RI	ENSG00000110321	EIF4G2	chr11:10821895:10821637:-@chr11:10821156:10821099:-	0.44	0.54	-0.1	27.36	0.1
RI	ENSG00000161939	C17orf49	chr17:6917464:6917596:+@chr17:6918381:6918475:+	0.86	0.76	0.1	1000000000000	0.1
RI	ENSG00000111642	CHD4	chr12:6692544:6692364:-@chr12:6692279:6692193:-	0.15	0.05	0.1	6.03	0.1
RI	ENSG00000141456	PELP1	chr17:4576440:4575409:-@chr17:4575177:4574986:-	0.98	0.85	0.13	5.4	0.13
RI	ENSG00000143774	GUK1	chr1:228335107:228335245:+@chr1:228335369:228335400:+	0.23	0.08	0.15	544249	0.15
RI	ENSG00000164172	MOCS2	chr5:52397339:52397189:-@chr5:52396317:52396241:-	0.97	0.81	0.16	353.63	0.16
RI	ENSG00000166582	CENPV	chr17:16252647:16252454:-@chr17:16251999:16251930:-	0.94	0.78	0.16	14.1	0.16
RI	ENSG00000168002	POLR2G	chr11:62529267:62529376:+@chr11:62530014:62530338:+	0.39	0.21	0.18	9.68	0.18
RI	ENSG00000143774	GUK1	chr1:228335107:228335239:+@chr1:228335322:228335400:+	0.54	0.36	0.18	5.07	0.18
RI	ENSG00000143774	GUK1	chr1:228335107:228335245:+@chr1:228335322:228335400:+	0.32	0.11	0.21	45735.7	0.21
RI	ENSG00000213619	NDUFS3	chr11:47602077:47602155:+@chr11:47602387:47602536:+	0.53	0.32	0.21	5.93	0.21
RI	ENSG00000160948	VPS28	chr8:145651591:145651409:-@chr8:145651155:145651066:-	0.57	0.36	0.21	5.17	0.21
RI	ENSG00000142541	RPL13A	chr19:49994036:49994121:+@chr19:49994297:49994356:+	0.31	0.08	0.23	1000000000000	0.23
RI	ENSG00000130713	EXOSC2	chr9:133572969:133573014:+@chr9:133573549:133573638:+	0.7	0.47	0.23	7.5	0.23
RI	ENSG00000049656	CLPTM1L	chr5:1325931:1325866:-@chr5:1324928:1324878:-	0.61	0.37	0.24	15.72	0.24
RI	ENSG00000160789	LMNA	chr1:156107445:156107534:+@chr1:156108279:156108548:+	0.94	0.66	0.28	20.43	0.28
RI	ENSG00000105135	ILVBL	chr19:15233841:15233703:-@chr19:15233615:15233504:-	0.33	0.05	0.28	16.76	0.28
RI	ENSG00000143224	PPOX	chr1:161136890:161137024:+@chr1:161137161:161137276:+	0.84	0.54	0.3	32.03	0.3
RI	ENSG00000143416	SELENBP1	chr1:151342245:151342189:-@chr1:151342030:151341480:-	0.57	0.26	0.31	16.85	0.31
RI	ENSG00000143224	PPOX	chr1:161136890:161137024:+@chr1:161137145:161137276:+	0.95	0.63	0.32	27.46	0.32
RI	ENSG00000159459	UBR1	chr15:43318861:43318759:-@chr15:43317627:43317572:-	0.65	0.25	0.4	14.86	0.4
RI	ENSG00000088387	DOCK9	chr13:99512776:99512659:-@chr13:99508285:99508152:-	0.67	0.26	0.41	43.4	0.41
RI	ENSG00000197555	SIPA1L1	chr14:72171438:72171500:+@chr14:72171939:72172057:+	0.75	0.33	0.42	7.35	0.42
RI	ENSG00000169660	HEXDC	chr17:80398873:80398951:+@chr17:80399041:80399142:+	0.93	0.41	0.52	1000000000000	0.52
RI	ENSG00000188283	ZNF383	chr19:37726451:37726577:+@chr19:37726881:37726976:+	0.76	0.17	0.59	157.47	0.59
A5	ENSG00000115806	GORASP2	chr2:171804860:171804890|171804940:+@chr2:171806049:171806252:+	0.22	0.93	-0.71	1000000000000	0.71
A5	ENSG00000155561	NUP205	chr7:135261717:135261847|135261876:+@chr7:135262544:135262772:+	0.35	0.96	-0.61	25568.6	0.61
A5	ENSG00000132793	LPIN3	chr20:39986522:39986597|39986674:+@chr20:39986877:39986991:+	0.22	0.83	-0.61	71.53	0.61
A5	ENSG00000174796	THAP6	chr4:76467619:76467696|76467762:+@chr4:76469538:76469902:+	0.25	0.84	-0.59	11.98	0.59
A5	ENSG00000238261	BX004987.5	chr1:143393991:143394044|143394211:+@chr1:143399695:143399814:+	0.2	0.78	-0.58	15.38	0.58
A5	ENSG00000138614	C15orf44	chr15:65903486:65903024|65903134:-@chr15:65897467:65897574:-	0.26	0.83	-0.57	1958.58	0.57
A5	ENSG00000089060	SLC24A6	chr12:113770765:113770528|113770554:-@chr12:113759001:113759153:-	0.33	0.88	-0.55	90.76	0.55
A5	ENSG00000088970	PLK1S1	chr20:21186130:21186168|21186222:+@chr20:21195173:21195338:+	0.31	0.85	-0.54	602.19	0.54
A5	ENSG00000043093	DCUN1D1	chr3:182683541:182683325|182683467:-@chr3:182681669:182681837:-	0.32	0.83	-0.51	66.63	0.51
A5	NA	NA	chr9:95640320:95640102|95640172:-@chr9:95618474:95618600:-	0.27	0.78	-0.51	6.86	0.51
A5	ENSG00000116747	TROVE2	chr1:193053709:193053787|193053828:+@chr1:193060781:193060906:+	0.4	0.89	-0.49	604.83	0.49
A5	ENSG00000175455	CCDC14	chr3:123674962:123674690|123674893:-@chr3:123667743:123667979:-	0.15	0.63	-0.48	1.27927e+07	0.48
A5	ENSG00000164970	FAM219A	chr9:34405962:34405863|34405914:-@chr9:34402703:34402805:-	0.28	0.76	-0.48	31.47	0.48
A5	ENSG00000164211	STARD4	chr5:110836814:110836700|110836784:-@chr5:110834022:110835804:-	0.3	0.77	-0.47	6.35	0.47
A5	ENSG00000126214,ENSG00000256500	KLC1,RP11-73M18.2	chr14:104129039:104129258|104129264:+@chr14:104135848:104135935:+	0.52	0.98	-0.46	6.05	0.46
A5	ENSG00000168890	TMEM150A	chr2:85828605:85828429|85828558:-@chr2:85828144:85828230:-	0.2	0.66	-0.46	5.37	0.46
A5	ENSG00000169609	C15orf40	chr15:83680393:83680238|83680249:-@chr15:83678989:83679115:-	0.14	0.59	-0.45	9.79	0.45
A5	ENSG00000111247	RAD51AP1	chr12:4662149:4662255|4662313:+@chr12:4668023:4669213:+	0.18	0.62	-0.44	7.08	0.44
A5	ENSG00000111325,ENSG00000256028	OGFOD2,RP11-197N18.2	chr12:123462528:123462604|123462638:+@chr12:123462907:123463116:+	0.23	0.67	-0.44	5.28	0.44
A5	ENSG00000119688	ABCD4	chr14:74755468:74755363|74755419:-@chr14:74754910:74754962:-	0.08	0.51	-0.43	6.89375e+06	0.43
A5	ENSG00000196456	ZNF775	chr7:150104672:150104951|150105576:+@chr7:150107248:150109558:+	0.38	0.81	-0.43	18.75	0.43
A5	NA	NA	chr17:74722912:74723260|74723295:+@chr17:74725772:74725876:+	0.39	0.82	-0.43	8.45	0.43
A5	ENSG00000140265	ZSCAN29	chr15:43656580:43656113|43656324:-@chr15:43650370:43654139:-	0.3	0.69	-0.39	6.8	0.39
A5	ENSG00000078668	VDAC3	chr8:42256230:42256301|42256382:+@chr8:42259306:42259533:+	0.61	0.99	-0.38	1000000000000	0.38
A5	NA	NA	chr17:74722912:74723260|74723295:+@chr17:74729060:74729297:+	0.2	0.55	-0.35	21.6	0.35
A5	ENSG00000172671	ZFAND4	chr10:46135411:46135199|46135264:-@chr10:46121399:46122553:-	0.13	0.48	-0.35	11.55	0.35
A5	ENSG00000144589	STK11IP	chr2:220479198:220479268|220479593:+@chr2:220479816:220480063:+	0.33	0.68	-0.35	11.46	0.35
A5	ENSG00000155561	NUP205	chr7:135261717:135261874|135261876:+@chr7:135262544:135262772:+	0.61	0.96	-0.35	8.43	0.35
A5	ENSG00000068137	PLEKHH3	chr17:40823148:40823012|40823021:-@chr17:40822591:40822723:-	0.55	0.89	-0.34	5.44	0.34
A5	ENSG00000137563	GGH	chr8:63936745:63936466|63936639:-@chr8:63930052:63930189:-	0.49	0.82	-0.33	122.98	0.33
A5	ENSG00000167778	SPRYD3	chr12:53469003:53468433|53468879:-@chr12:53467070:53467255:-	0.39	0.71	-0.32	8.74	0.32
A5	ENSG00000127184	COX7C	chr5:85915170:85915259|85915695:+@chr5:85916485:85916583:+	0.46	0.75	-0.29	1000000000000	0.29
A5	ENSG00000070882	OSBPL3	chr7:24874355:24873706|24874105:-@chr7:24870387:24870524:-	0.21	0.5	-0.29	10.29	0.29
A5	NA	NA	chr10:73975758:73975830|73975896:+@chr10:73990124:73990198:+	0.65	0.92	-0.27	7985.39	0.27
A5	ENSG00000121022,ENSG00000178125	COPS5,PPP1R42	chr8:67960094:67959920|67960003:-@chr8:67958047:67958195:-	0.05	0.32	-0.27	61.42	0.27
A5	ENSG00000182196,ENSG00000256028	ARL6IP4,RP11-197N18.2	chr12:123465676:123465813|123465846:+@chr12:123466142:123466426:+	0.52	0.79	-0.27	9.48	0.27
A5	ENSG00000167280	ENGASE	chr17:77077980:77078145|77078959:+@chr17:77079102:77079205:+	0.55	0.81	-0.26	180631	0.26
A5	ENSG00000165494	PCF11	chr11:82878457:82878547|82878940:+@chr11:82879470:82881037:+	0.2	0.45	-0.25	84.08	0.25
A5	ENSG00000119866	BCL11A	chr2:60689559:60687665|60689417:-@chr2:60678302:60679801:-	0.48	0.73	-0.25	73.1	0.25
A5	ENSG00000119866	BCL11A	chr2:60689559:60687817|60689417:-@chr2:60678302:60679801:-	0.48	0.73	-0.25	46.82	0.25
A5	ENSG00000158773	USF1	chr1:161011636:161011525|161011624:-@chr1:161011114:161011201:-	0.69	0.93	-0.24	7.17	0.24
A5	ENSG00000074266	EED	chr11:85974987:85975305|85977258:+@chr11:85988022:85988180:+	0.22	0.45	-0.23	5.28	0.23
A5	ENSG00000197381	ADARB1	chr21:46641933:46642195|46643492:+@chr21:46645462:46646478:+	0.5	0.72	-0.22	4891.52	0.22
A5	NA	NA	chr19:35989665:35989500|35989618:-@chr19:35988119:35988440:-	0.55	0.77	-0.22	14.38	0.22
A5	ENSG00000164548	TRA2A	chr7:23562051:23561751|23561973:-@chr7:23561326:23561459:-	0.48	0.7	-0.22	8.46	0.22
A5	ENSG00000198860	TSEN15	chr1:184041291:184041328|184041432:+@chr1:184041961:184043344:+	0.15	0.36	-0.21	25.14	0.21
A5	ENSG00000126456	IRF3	chr19:50169132:50168741|50168888:-@chr19:50167931:50168103:-	0.35	0.56	-0.21	25.11	0.21
A5	ENSG00000137955	RABGGTB	chr1:76252385:76252482|76252550:+@chr1:76253182:76253289:+	0.16	0.37	-0.21	6.11	0.21
A5	ENSG00000197381	ADARB1	chr21:46641933:46642022|46643492:+@chr21:46645462:46646478:+	0.56	0.76	-0.2	3699.26	0.2
A5	ENSG00000150433	TMEM218	chr11:124972705:124972028|124972630:-@chr11:124971097:124971199:-	0.79	0.97	-0.18	1016.61	0.18
A5	ENSG00000198830	HMGN2	chr1:26799974:26800018|26800076:+@chr1:26800194:26800223:+	0.04	0.22	-0.18	21.92	0.18
A5	ENSG00000171204	TMEM126B	chr11:85345130:85345220|85345323:+@chr11:85346711:85346822:+	0.78	0.96	-0.18	17.76	0.18
A5	ENSG00000187147	RNF220	chr1:45101217:45101260|45101338:+@chr1:45101702:45101834:+	0.35	0.53	-0.18	12.37	0.18
A5	ENSG00000003509	C2orf56	chr2:37468721:37468934|37469836:+@chr2:37471006:37471116:+	0.62	0.8	-0.18	5	0.18
A5	ENSG00000132424	PNISR	chr6:99852578:99851705|99852479:-@chr6:99850416:99850586:-	0.38	0.55	-0.17	1000000000000	0.17
A5	ENSG00000135506	OS9	chr12:58112776:58112965|58114046:+@chr12:58114189:58114301:+	0.38	0.55	-0.17	1000000000000	0.17
A5	ENSG00000145425	RPS3A	chr4:152022127:152022237|152022314:+@chr4:152024023:152024231:+	0.72	0.89	-0.17	1000000000000	0.17
A5	ENSG00000198736	MSRB1	chr16:1991406:1990779|1991258:-@chr16:1988234:1989144:-	0.38	0.55	-0.17	26.29	0.17
A5	ENSG00000162191	UBXN1	chr11:62445304:62444285|62444990:-@chr11:62443970:62444111:-	0.75	0.9	-0.15	48.12	0.15
A5	ENSG00000104529	EEF1D	chr8:144675063:144674817|144674885:-@chr8:144668899:144669022:-	0.03	0.18	-0.15	16.82	0.15
A5	NA	NA	chr12:56558515:56558087|56558432:-@chr12:56555636:56557549:-	0.73	0.88	-0.15	7.18	0.15
A5	ENSG00000170689,ENSG00000260027	HOXB9,RP11-357H14.19	chr17:46703835:46703115|46703354:-@chr17:46698519:46700497:-	0.69	0.83	-0.14	16.57	0.14
A5	ENSG00000104852	SNRNP70	chr19:49605371:49605442|49606844:+@chr19:49607891:49607992:+	0.64	0.77	-0.13	2.77731e+09	0.13
A5	ENSG00000105854	PON2	chr7:95045609:95045484|95045554:-@chr7:95041624:95041789:-	0.02	0.15	-0.13	25.79	0.13
A5	ENSG00000169738	DCXR	chr17:79994324:79994260|79994290:-@chr17:79994067:79994184:-	0.86	0.98	-0.12	7.30995e+06	0.12
A5	ENSG00000073060	SCARB1	chr12:125271049:125267229|125270903:-@chr12:125262174:125263132:-	0.43	0.55	-0.12	41229.9	0.12
A5	ENSG00000117335	CD46	chr1:207940358:207940540|207943707:+@chr1:207956637:207956675:+	0.72	0.84	-0.12	660.31	0.12
A5	ENSG00000129084,ENSG00000256206	PSMA1,RP11-140L24.4	chr11:14536037:14535363|14535936:-@chr11:14535116:14535245:-	0.55	0.67	-0.12	356.6	0.12
A5	ENSG00000186205	2013-03-01	chr1:220971216:220971356|220971407:+@chr1:220978394:220978455:+	0.03	0.15	-0.12	45.93	0.12
A5	ENSG00000123374	CDK2	chr12:56360615:56360908|56361718:+@chr12:56361833:56361953:+	0.36	0.48	-0.12	7.2	0.12
A5	ENSG00000147403	RPL10	chrX:153627679:153627737|153627935:+@chrX:153628144:153628282:+	0.55	0.66	-0.11	1000000000000	0.11
A5	ENSG00000169592	INO80E	chr16:30012533:30012851|30015978:+@chr16:30016542:30017112:+	0.47	0.58	-0.11	1000000000000	0.11
A5	ENSG00000150991	UBC	chr12:125398320:125397183|125397867:-@chr12:125396192:125396726:-	0.84	0.95	-0.11	1000000000000	0.11
A5	ENSG00000100445	SDR39U1	chr14:24911658:24910215|24911552:-@chr14:24909989:24910132:-	0.61	0.72	-0.11	84.2	0.11
A5	ENSG00000182093	WRB	chr21:40762624:40762789|40763402:+@chr21:40763695:40763762:+	0.15	0.26	-0.11	32.39	0.11
A5	ENSG00000115486	GGCX	chr2:85785785:85785563|85785662:-@chr2:85783305:85783383:-	0.88	0.99	-0.11	31.61	0.11
A5	ENSG00000073060	SCARB1	chr12:125271049:125270653|125270903:-@chr12:125262174:125263132:-	0.05	0.16	-0.11	7.92	0.11
A5	ENSG00000100991	TRPC4AP	chr20:33592373:33591676|33592261:-@chr20:33591213:33591419:-	0.19	0.3	-0.11	7.11	0.11
A5	ENSG00000136932	C9orf156	chr9:100675257:100673200|100675155:-@chr9:100672242:100672898:-	0.06	0.17	-0.11	5.38	0.11
A5	ENSG00000141551	CSNK1D	chr17:80206890:80203852|80206751:-@chr17:80200537:80202707:-	0.18	0.28	-0.1	1000000000000	0.1
A5	ENSG00000164683	HEY1	chr8:80679327:80679232|80679244:-@chr8:80678886:80678967:-	0.1	0.2	-0.1	2.5015e+06	0.1
A5	ENSG00000073060	SCARB1	chr12:125271049:125267229|125270653:-@chr12:125262174:125263132:-	0.46	0.56	-0.1	31.01	0.1
A5	ENSG00000096696	DSP	chr6:7579508:7580005|7581802:+@chr6:7582875:7586946:+	0.6	0.7	-0.1	10.98	0.1
A5	ENSG00000089280	FUS	chr16:31195530:31195705|31195717:+@chr16:31196260:31196500:+	1	0.9	0.1	1000000000000	0.1
A5	ENSG00000161939	C17orf49	chr17:6917464:6917596|6918197:+@chr17:6918381:6918475:+	0.91	0.8	0.11	1000000000000	0.11
A5	ENSG00000105258	POLR2I	chr19:36605153:36605053|36605079:-@chr19:36604917:36604968:-	0.14	0.03	0.11	18.97	0.11
A5	ENSG00000203875	SNHG5	chr6:86387750:86387513|86387672:-@chr6:86387142:86387210:-	0.95	0.83	0.12	1000000000000	0.12
A5	ENSG00000204387	C6orf48	chr6:31802685:31802834|31802977:+@chr6:31803188:31803228:+	0.5	0.38	0.12	40.71	0.12
A5	ENSG00000122786	CALD1	chr7:134617739:134618141|134618828:+@chr7:134620439:134620516:+	0.37	0.24	0.13	35.32	0.13
A5	ENSG00000143156	NME7	chr1:169138792:169138671|169138685:-@chr1:169101769:169102055:-	0.17	0.02	0.15	15.24	0.15
A5	ENSG00000008128	CDK11A	chr1:1641079:1640918|1640957:-@chr1:1640477:1640572:-	0.19	0.04	0.15	10	0.15
A5	ENSG00000125870	SNRPB2	chr20:16710609:16710709|16710809:+@chr20:16712313:16712411:+	0.88	0.72	0.16	3796.44	0.16
A5	ENSG00000127314	RAP1B	chr12:69004709:69004823|69004836:+@chr12:69042479:69042561:+	0.21	0.04	0.17	8.28	0.17
A5	ENSG00000131470	PSMC3IP	chr17:40726228:40725837|40726214:-@chr17:40725496:40725641:-	0.72	0.53	0.19	28.99	0.19
A5	ENSG00000100462	PRMT5	chr14:23390265:23390049|23390197:-@chr14:23389738:23389940:-	0.85	0.65	0.2	25.89	0.2
A5	ENSG00000085733	CTTN	chr11:70281572:70281661|70281850:+@chr11:70282388:70282690:+	0.76	0.55	0.21	107.23	0.21
A5	ENSG00000148985	PGAP2	chr11:3845500:3845594|3845606:+@chr11:3846250:3846358:+	0.92	0.71	0.21	7.36	0.21
A5	ENSG00000122783	C7orf49	chr7:134853812:134853501|134853538:-@chr7:134852484:134852559:-	0.82	0.6	0.22	5.59	0.22
A5	ENSG00000182165	TP53TG1	chr7:86974831:86974359|86974621:-@chr7:86970839:86971000:-	0.92	0.69	0.23	12.85	0.23
A5	ENSG00000131470	PSMC3IP	chr17:40726228:40726117|40726214:-@chr17:40725496:40725641:-	0.87	0.63	0.24	24.8	0.24
A5	ENSG00000132600	PRMT7	chr16:68344959:68345002|68345014:+@chr16:68349800:68349977:+	0.29	0.04	0.25	5.28	0.25
A5	NA	NA	chr5:180288286:180287528|180288219:-@chr5:180274611:180278493:-	0.89	0.61	0.28	3.55427e+10	0.28
A5	NA	NA	chr7:143554443:143554167|143554193:-@chr7:143548461:143551235:-	0.5	0.2	0.3	13074.6	0.3
A5	ENSG00000151743	AMN1	chr12:31882108:31881905|31881925:-@chr12:31862227:31862359:-	0.94	0.6	0.34	238.85	0.34
A5	ENSG00000108296	CWC25	chr17:36966848:36966529|36966721:-@chr17:36965955:36966018:-	0.87	0.53	0.34	9.49	0.34
A5	ENSG00000180228	PRKRA	chr2:179312313:179312183|179312232:-@chr2:179309149:179309227:-	0.39	0.04	0.35	38.68	0.35
A5	NA	NA	chr9:26892826:26892257|26892411:-@chr9:26887311:26887511:-	0.43	0.08	0.35	10.52	0.35
A5	ENSG00000167904	TMEM68	chr8:56685937:56685786|56685828:-@chr8:56676495:56676539:-	0.52	0.17	0.35	6.38	0.35
A5	ENSG00000163608	C3orf17	chr3:112732879:112732796|112732800:-@chr3:112729892:112730253:-	0.47	0.05	0.42	5.99	0.42
A5	ENSG00000206503	HLA-A	chr6:29912277:29912393|29912411:+@chr6:29912836:29912868:+	0.62	0.19	0.43	2506.73	0.43
A5	ENSG00000230487	AC093734.11	chr7:1609709:1609915|1610169:+@chr7:1614351:1614499:+	0.83	0.39	0.44	10.4	0.44
A5	ENSG00000198853	RUSC2	chr9:35546427:35548207|35548532:+@chr9:35555057:35555698:+	0.9	0.46	0.44	5.84	0.44
A5	ENSG00000152990	GPR125	chr4:22446756:22446596|22446664:-@chr4:22444273:22444486:-	0.85	0.38	0.47	7.62	0.47
A5	ENSG00000187741	FANCA	chr16:89805697:89805537|89805541:-@chr16:89805290:89805382:-	0.61	0.13	0.48	6.76	0.48
A5	ENSG00000104164,ENSG00000260170	PLDN,RP11-96O20.4	chr15:45890078:45890089|45890194:+@chr15:45895298:45895385:+	0.83	0.24	0.59	10.51	0.59
A5	ENSG00000127314	RAP1B	chr12:69004619:69004823|69004832:+@chr12:69042486:69042561:+	0.87	0.25	0.62	10.91	0.62
A5	ENSG00000014123	UFL1	chr6:96996040:96996157|96996170:+@chr6:96997288:96997454:+	0.76	0.11	0.65	10.59	0.65
A5	ENSG00000158402	CDC25C	chr5:137625252:137625169|137625190:-@chr5:137622858:137622956:-	0.7	0.04	0.66	20.8	0.66
A5	ENSG00000116830	TTF2	chr1:117603077:117603179|117603183:+@chr1:117605009:117605095:+	0.78	0.07	0.71	14419.7	0.71
A5	ENSG00000215472,ENSG00000265681	RP11-110H1.2,RPL17	chr18:47018834:47018628|47018645:-@chr18:47018106:47018203:-	0.95	0.22	0.73	1000000000000	0.73
A3	ENSG00000136932	C9orf156	chr9:100675683:100675840:-@chr9:100673352|100675257:100673200:-	0.23	0.8	-0.57	291052	0.57
A3	ENSG00000113108	APBB3	chr5:139941685:139941812:-@chr5:139941434|139941580:139941429:-	0.21	0.76	-0.55	16.3	0.55
A3	ENSG00000144642	RBMS3	chr3:29322803:29323247:+@chr3:29476234|29476237:29476406:+	0.39	0.92	-0.53	153.83	0.53
A3	ENSG00000104529	EEF1D	chr8:144679518:144679845:-@chr8:144674830|144674967:144674817:-	0.41	0.92	-0.51	22.27	0.51
A3	ENSG00000080822,ENSG00000080819	CLDND1,CPOX	chr3:98240497:98240547:-@chr3:98240221|98240281:98239977:-	0.42	0.87	-0.45	41.34	0.45
A3	ENSG00000010539	ZNF200	chr16:3282421:3282547:-@chr16:3274610|3274613:3272325:-	0.39	0.84	-0.45	6.71	0.45
A3	ENSG00000080822,ENSG00000080819	CLDND1,CPOX	chr3:98240497:98240547:-@chr3:98240221|98240286:98239977:-	0.44	0.87	-0.43	914.7	0.43
A3	ENSG00000141013	GAS8	chr16:90094044:90094130:+@chr16:90097584|90097707:90097904:+	0.25	0.67	-0.42	72.31	0.42
A3	NA	NA	chrX:23858430:23858494:-@chrX:23851627|23851729:23851465:-	0.28	0.67	-0.39	1000000000000	0.39
A3	NA	NA	chr13:115086585:115086707:+@chr13:115089263|115089266:115092803:+	0.55	0.94	-0.39	6.73	0.39
A3	ENSG00000244306	CTD-2314B22.3	chr14:19921359:19921470:-@chr14:19919605|19919629:19919492:-	0.55	0.93	-0.38	85806.5	0.38
A3	ENSG00000203836	NBPF24	chr1:147582665:147582828:-@chr1:147581622|147581698:147581571:-	0.07	0.45	-0.38	6447.3	0.38
A3	ENSG00000168487	BMP1	chr8:22052975:22053100:+@chr8:22053694|22054193:22054353:+	0.31	0.68	-0.37	5.64	0.37
A3	ENSG00000225210	AL589743.1	chr14:19653893:19654004:+@chr14:19655734|19655758:19655871:+	0.57	0.92	-0.35	344.51	0.35
A3	ENSG00000010244,ENSG00000265794	ZNF207,RP11-227G15.3	chr17:30677157:30677345:+@chr17:30678795|30678817:30678931:+	0.04	0.39	-0.35	70.62	0.35
A3	ENSG00000204147	ASAH2B	chr10:52502675:52502770:+@chr10:52504888|52504962:52505034:+	0.6	0.95	-0.35	9.54	0.35
A3	ENSG00000141013	GAS8	chr16:90094044:90094130:+@chr16:90097598|90097707:90097904:+	0.31	0.66	-0.35	7.73	0.35
A3	ENSG00000152042,ENSG00000232637	NBPF11,WI2-3658N16.1	chr1:146040890:146041053:-@chr1:146039847|146039923:146039796:-	0.12	0.46	-0.34	14.06	0.34
A3	ENSG00000008838	MED24	chr17:38191169:38191225:-@chr17:38189709|38190024:38189598:-	0.41	0.74	-0.33	16.57	0.33
A3	ENSG00000178381	ZFAND2A	chr7:1195089:1195220:-@chr7:1192767|1192860:1192544:-	0.55	0.88	-0.33	6.28	0.33
A3	ENSG00000239382,ENSG00000248101	ALKBH6,AC002116.5	chr19:36502306:36502366:-@chr19:36501947|36501979:36501640:-	0.09	0.41	-0.32	12.93	0.32
A3	ENSG00000239382,ENSG00000248101	ALKBH6,AC002116.5	chr19:36502306:36502366:-@chr19:36501947|36501979:36501796:-	0.08	0.4	-0.32	9.9	0.32
A3	ENSG00000154889	MPPE1	chr18:11906202:11906308:-@chr18:11897130|11897355:11896983:-	0.58	0.9	-0.32	9.07	0.32
A3	ENSG00000174384,ENSG00000229018	RP11-313P13.4,RP11-313P13.3	chr7:72509966:72510052:+@chr7:72510219|72510229:72510331:+	0.23	0.55	-0.32	8.11	0.32
A3	ENSG00000238105	GOLGA2B	chr12:100551306:100551517:-@chr12:100551034|100551223:100550943:-	0.56	0.88	-0.32	6.25	0.32
A3	ENSG00000104529	EEF1D	chr8:144679518:144679845:-@chr8:144674830|144675063:144674817:-	0.64	0.96	-0.32	5	0.32
A3	ENSG00000183762	KREMEN1	chr22:29521251:29521404:+@chr22:29533330|29533490:29533662:+	0.57	0.86	-0.29	5.62	0.29
A3	ENSG00000111653	ING4	chr12:6762102:6762216:-@chr12:6761933|6761936:6761828:-	0.27	0.56	-0.29	5.28	0.29
A3	ENSG00000116750	UCHL5	chr1:192992974:192993076:-@chr1:192992166|192992169:192992056:-	0.16	0.44	-0.28	13.06	0.28
A3	ENSG00000100097	LGALS1	chr22:38072993:38073072:+@chr22:38074383|38074490:38074661:+	0.07	0.33	-0.26	25.37	0.26
A3	ENSG00000008130	NADK	chr1:1688620:1688749:-@chr1:1688047|1688321:1687942:-	0.16	0.42	-0.26	14.77	0.26
A3	ENSG00000077254	USP33	chr1:78187709:78187881:-@chr1:78187586|78187610:78187516:-	0.66	0.92	-0.26	6.15	0.26
A3	ENSG00000123219	CENPK	chr5:64857290:64857391:-@chr5:64850725|64850773:64850624:-	0.7	0.96	-0.26	5.04	0.26
A3	ENSG00000171634	BPTF	chr17:65971888:65972074:+@chr17:65978249|65978368:65978685:+	0.17	0.42	-0.25	16.05	0.25
A3	ENSG00000127564	PKMYT1	chr16:3024001:3024158:-@chr16:3023216|3023254:3023139:-	0.17	0.42	-0.25	5.32	0.25
A3	ENSG00000139624	CERS5	chr12:50528329:50528485:-@chr12:50526847|50527851:50526745:-	0.32	0.56	-0.24	28.59	0.24
A3	NA	NA	chr14:36769991:36770029:-@chr14:36768393|36768396:36767764:-	0.72	0.96	-0.24	7.88	0.24
A3	ENSG00000100462	PRMT5	chr14:23398376:23398661:-@chr14:23397420|23397824:23397335:-	0.41	0.64	-0.23	31.3	0.23
A3	ENSG00000087088	BAX	chr19:49464067:49464171:+@chr19:49464789|49464828:49465055:+	0.47	0.7	-0.23	8.86	0.23
A3	ENSG00000103145	HCFC1R1	chr16:3073848:3073969:-@chr16:3073413|3073531:3073234:-	0.07	0.29	-0.22	19.58	0.22
A3	ENSG00000010244,ENSG00000265794	ZNF207,RP11-227G15.3	chr17:30677157:30677345:+@chr17:30678762|30678817:30678931:+	0.03	0.24	-0.21	74.86	0.21
A3	ENSG00000174720	LARP7	chr4:113568355:113568705:+@chr4:113568807|113568846:113568990:+	0.08	0.29	-0.21	15.58	0.21
A3	ENSG00000144711	IQSEC1	chr3:12944273:12944322:-@chr3:12940933|12943022:12938719:-	0.76	0.96	-0.2	1.21844e+06	0.2
A3	ENSG00000133740	E2F5	chr8:86124392:86124439:+@chr8:86125988|86126395:86126753:+	0.78	0.98	-0.2	149.95	0.2
A3	ENSG00000162521	RBBP4	chr1:33117515:33117662:+@chr1:33133826|33133921:33133999:+	0.55	0.75	-0.2	25.93	0.2
A3	NA	NA	chr9:114986413:114986490:-@chr9:114982653|114986263:114979995:-	0.68	0.87	-0.19	1000000000000	0.19
A3	ENSG00000169045	HNRNPH1	chr5:179045146:179045324:-@chr5:179044912|179045061:179044800:-	0.8	0.98	-0.18	1000000000000	0.18
A3	ENSG00000183506	PI4KAP2	chr22:21832874:21832983:-@chr22:21832390|21832450:21832286:-	0.14	0.31	-0.17	180.52	0.17
A3	ENSG00000089006	SNX5	chr20:17936009:17936119:-@chr20:17934761|17934867:17934640:-	0.12	0.29	-0.17	169.78	0.17
A3	ENSG00000131748	STARD3	chr17:37817234:37817338:+@chr17:37818504|37819057:37819737:+	0.3	0.47	-0.17	7.59	0.17
A3	ENSG00000100462	PRMT5	chr14:23398461:23398661:-@chr14:23397425|23397824:23397335:-	0.64	0.81	-0.17	6.51	0.17
A3	ENSG00000164548	TRA2A	chr7:23571408:23571656:-@chr7:23561459|23562051:23561326:-	0.33	0.49	-0.16	7.55097e+08	0.16
A3	ENSG00000261740,ENSG00000254634	RP11-345J4.5,RP11-231C14.3	chr16:29465337:29465434:-@chr16:29458243|29458347:29458123:-	0.2	0.36	-0.16	8.45	0.16
A3	ENSG00000196998,ENSG00000250232	WDR45,AF196779.12	chrX:48933525:48933604:-@chrX:48933322|48933401:48933204:-	0.79	0.95	-0.16	7.77	0.16
A3	ENSG00000132424	PNISR	chr6:99873091:99873207:-@chr6:99862562|99864304:99862448:-	0.52	0.67	-0.15	9.67	0.15
A3	ENSG00000164172	MOCS2	chr5:52402907:52403051:-@chr5:52396364|52397339:52396241:-	0.21	0.36	-0.15	6.16	0.15
A3	ENSG00000164548	TRA2A	chr7:23570800:23570889:-@chr7:23561459|23562051:23561326:-	0.64	0.79	-0.15	5.69	0.15
A3	ENSG00000204628	GNB2L1	chr5:180665099:180665239:-@chr5:180664042|180664719:180663929:-	0.56	0.7	-0.14	1000000000000	0.14
A3	ENSG00000185630	PBX1	chr1:164790774:164790863:+@chr1:164815821|164818577:164821060:+	0.85	0.99	-0.14	1.27805e+10	0.14
A3	ENSG00000072134	EPN2	chr17:19235166:19235381:+@chr17:19237269|19238718:19240028:+	0.69	0.83	-0.14	4.36939e+08	0.14
A3	ENSG00000143971	ETAA1	chr2:67629994:67630106:+@chr2:67630357|67632129:67632467:+	0.79	0.93	-0.14	29126	0.14
A3	ENSG00000110330	BIRC2	chr11:102217966:102218107:+@chr11:102219329|102220609:102221480:+	0.37	0.51	-0.14	16.43	0.14
A3	ENSG00000234741	GAS5	chr1:173834648:173834685:-@chr1:173833842|173834420:173833395:-	0.85	0.98	-0.13	1000000000000	0.13
A3	ENSG00000110075	PPP6R3	chr11:68377372:68377491:+@chr11:68380534|68382100:68382801:+	0.7	0.83	-0.13	1000000000000	0.13
A3	ENSG00000165119	HNRNPK	chr9:86585077:86585246:-@chr9:86584295|86584355:86582998:-	0.15	0.28	-0.13	1000000000000	0.13
A3	ENSG00000162613	FUBP1	chr1:78414840:78414985:-@chr1:78414459|78414599:78414090:-	0.21	0.34	-0.13	1.69161e+06	0.13
A3	ENSG00000153914	SREK1	chr5:65449291:65449424:+@chr5:65451893|65454637:65454760:+	0.82	0.95	-0.13	8.33	0.13
A3	ENSG00000229807	XIST	chrX:73045950:73046290:-@chrX:73042051|73042068:73041906:-	0.43	0.55	-0.12	1000000000000	0.12
A3	ENSG00000119787	ATL2	chr2:38525286:38525717:-@chr2:38523255|38523732:38522029:-	0.18	0.3	-0.12	163.11	0.12
A3	ENSG00000106976	DNM1	chr9:131015380:131015416:+@chr9:131016285|131016933:131017527:+	0.69	0.81	-0.12	7.98	0.12
A3	ENSG00000176623	FAM82B	chr8:87487049:87487182:-@chr8:87484708|87486587:87484578:-	0.83	0.94	-0.11	2.66428e+10	0.11
A3	ENSG00000102858	MGRN1	chr16:4733844:4733933:+@chr16:4736260|4738797:4740975:+	0.2	0.31	-0.11	30.12	0.11
A3	ENSG00000129351	ILF3	chr19:10794593:10794646:+@chr19:10795092|10795535:10796443:+	0.83	0.94	-0.11	17.17	0.11
A3	ENSG00000157916	RER1	chr1:2332296:2332374:+@chr1:2333536|2333646:2333781:+	0.08	0.19	-0.11	5.38	0.11
A3	NA	NA	chr19:2040133:2040176:-@chr19:2037828|2039855:2037470:-	0.76	0.86	-0.1	2.40001e+07	0.1
A3	ENSG00000237289,ENSG00000223572	CKMT1B,CKMT1A	chr15:43888606:43888729:+@chr15:43889574|43890391:43890525:+	0.14	0.24	-0.1	32229.3	0.1
A3	ENSG00000142864	SERBP1	chr1:67890766:67890906:-@chr1:67890642|67890660:67890571:-	0.26	0.36	-0.1	157.89	0.1
A3	ENSG00000007392	LUC7L	chr16:279278:279449:-@chr16:277335|278401:277241:-	0.84	0.94	-0.1	24.72	0.1
A3	ENSG00000125354	2013-09-06	chrX:118759298:118759342:-@chrX:118752749|118754014:118750909:-	0.48	0.37	0.11	37.33	0.11
A3	ENSG00000206503	HLA-A	chr6:29911899:29912174:+@chr6:29912277|29912836:29912868:+	0.64	0.53	0.11	32.32	0.11
A3	ENSG00000125354	2013-09-06	chrX:118763281:118763471:-@chrX:118752749|118754014:118750909:-	0.48	0.37	0.11	16.11	0.11
A3	NA	NA	chr14:20923290:20923497:+@chr14:20923737|20923894:20923932:+	0.7	0.59	0.11	6.58	0.11
A3	ENSG00000154380	ENAH	chr1:225706900:225707267:-@chr1:225705008|225705692:225704898:-	0.44	0.32	0.12	16.56	0.12
A3	NA	NA	chr14:20923290:20923553:+@chr14:20923737|20923897:20923932:+	0.96	0.83	0.13	621.18	0.13
A3	ENSG00000138041	SMEK2	chr2:55792038:55792177:-@chr2:55791612|55791633:55791449:-	0.98	0.83	0.15	45.56	0.15
A3	ENSG00000162923	WDR26	chr1:224619179:224619283:-@chr1:224612356|224612421:224612220:-	0.29	0.14	0.15	9.04	0.15
A3	ENSG00000163444	TMEM183A	chr1:202977771:202977938:+@chr1:202984017|202984020:202984176:+	0.97	0.8	0.17	6.02	0.17
A3	ENSG00000128699	ORMDL1	chr2:190648995:190649097:-@chr2:190647328|190647849:190647148:-	0.34	0.16	0.18	365.63	0.18
A3	ENSG00000166441	RPL27A	chr11:8704749:8704812:+@chr11:8705410|8705508:8705628:+	0.25	0.07	0.18	15.41	0.18
A3	ENSG00000149091	DGKZ	chr11:46389552:46389629:+@chr11:46390914|46391044:46391100:+	0.23	0.05	0.18	11.56	0.18
A3	ENSG00000135119	RNFT2	chr12:117273986:117274087:+@chr12:117290143|117290455:117291436:+	0.97	0.79	0.18	7.37	0.18
A3	ENSG00000094914	AAAS	chr12:53708878:53708924:-@chr12:53708225|53708633:53708082:-	0.94	0.75	0.19	182.07	0.19
A3	ENSG00000162923	WDR26	chr1:224619227:224619283:-@chr1:224612356|224612421:224612220:-	0.34	0.15	0.19	14.06	0.19
A3	ENSG00000068120	COASY	chr17:40714092:40714237:+@chr17:40714374|40714630:40715340:+	0.73	0.51	0.22	1762.8	0.22
A3	ENSG00000167792	NDUFV1	chr11:67374429:67374547:+@chr11:67374770|67374837:67375087:+	0.36	0.13	0.23	5.69	0.23
A3	ENSG00000175470	PPP2R2D	chr10:133754086:133754198:+@chr10:133757472|133757599:133757649:+	0.95	0.69	0.26	16.35	0.26
A3	ENSG00000101752	MIB1	chr18:19359442:19359646:+@chr18:19371296|19371335:19371518:+	0.3	0.03	0.27	5.5	0.27
A3	ENSG00000123473	STIL	chr1:47735307:47735538:-@chr1:47728734|47728788:47728575:-	0.88	0.59	0.29	8.82	0.29
A3	ENSG00000215252,ENSG00000175265	GOLGA8B,GOLGA8A	chr15:34821219:34821475:-@chr15:34820948|34820951:34820808:-	0.84	0.53	0.31	13.38	0.31
A3	NA	NA	chr2:3605976:3606588:+@chr2:3606994|3607038:3607319:+	0.63	0.3	0.33	5.68	0.33
A3	ENSG00000198589	LRBA	chr4:151246961:151247050:-@chr4:151242520|151242535:151242343:-	0.45	0.11	0.34	68.76	0.34
A3	ENSG00000160298	C21orf58	chr21:47737926:47738134:-@chr21:47737182|47737262:47737122:-	0.65	0.29	0.36	34.75	0.36
A3	ENSG00000134575	ACP2	chr11:47270227:47270457:-@chr11:47269278|47269684:47269192:-	0.88	0.51	0.37	15.89	0.37
A3	ENSG00000006042	TMEM98	chr17:31254928:31255255:+@chr17:31258345|31258493:31258677:+	0.9	0.5	0.4	389.54	0.4
A3	ENSG00000166783	KIAA0430	chr16:15694285:15694410:-@chr16:15692881|15692974:15692711:-	0.58	0.17	0.41	11.42	0.41
A3	ENSG00000183305	MAGEA2B	chrX:151883119:151883171:+@chrX:151883336|151883568:151883646:+	0.91	0.5	0.41	9.58	0.41
A3	ENSG00000142530	FAM71E1	chr19:50979090:50979190:-@chr19:50978712|50978760:50978582:-	0.78	0.37	0.41	6.58	0.41
A3	ENSG00000197555	SIPA1L1	chr14:72169098:72169222:+@chr14:72171438|72171939:72172057:+	0.57	0.15	0.42	38.46	0.42
A3	ENSG00000092020	PPP2R3C	chr14:35591108:35591307:-@chr14:35579835|35579856:35579731:-	0.47	0.05	0.42	8.34	0.42
A3	ENSG00000134744	ZCCHC11	chr1:52903892:52904007:-@chr1:52902647|52902650:52902427:-	0.86	0.43	0.43	7.18	0.43
A3	ENSG00000169045	HNRNPH1	chr5:179044515:179044650:-@chr5:179043959|179044111:179043870:-	0.99	0.55	0.44	1000000000000	0.44
A3	ENSG00000166471	TMEM41B	chr11:9316806:9316934:-@chr11:9310082|9310089:9309989:-	0.49	0.05	0.44	92.03	0.44
A3	ENSG00000221926	TRIM16	chr17:15587510:15587613:-@chr17:15586471|15586685:15586350:-	0.85	0.41	0.44	86.17	0.44
A3	ENSG00000168944	CEP120	chr5:122726804:122727031:-@chr5:122725834|122726059:122725618:-	0.67	0.21	0.46	9.95	0.46
A3	ENSG00000079974	RABL2B	chr22:51208333:51208444:-@chr22:51207977|51207980:51207883:-	0.78	0.31	0.47	9.07	0.47
A3	ENSG00000090661	CERS4	chr19:8275590:8275746:+@chr19:8315928|8315960:8316133:+	0.64	0.16	0.48	8.89	0.48
A3	ENSG00000134815	DHX34	chr19:47852538:47852609:+@chr19:47856009|47856011:47856992:+	0.58	0.09	0.49	10.12	0.49
A3	ENSG00000076864	RAP1GAP	chr1:21924893:21924995:-@chr1:21924557|21924588:21924454:-	0.72	0.22	0.5	7.12	0.5
A3	ENSG00000079102	RUNX1T1	chr8:93088193:93088365:-@chr8:93029591|93029659:93029454:-	0.71	0.21	0.5	5.7	0.5
A3	ENSG00000172667	ZMAT3	chr3:178745211:178745311:-@chr3:178743013|178743016:178735011:-	0.69	0.18	0.51	8.96	0.51
A3	ENSG00000133460,ENSG00000251357	SLC2A11,AP000350.10	chr22:24224946:24225056:+@chr22:24226061|24226136:24226211:+	0.78	0.16	0.62	12.87	0.62
A3	ENSG00000072682	P4HA2	chr5:131562779:131562914:-@chr5:131554337|131554361:131554238:-	0.82	0.19	0.63	149.78	0.63
A3	ENSG00000206195	AP000525.8	chr22:16187165:16187302:-@chr22:16186946|16186953:16186811:-	0.74	0.05	0.69	59.41	0.69

## Sheet: TG Gene Expression 
GeneNames	CTRL Reads	TG003 Reads	log2(Fold_change)	p-value	q-value(Benjamini et al. 1995)	q-value(Storey et al. 2003)	Signature(p-value < 0.001)
TAS2R5	12	62	-2.36923	3.18865e-09	4.32279e-08	2.00907e-08	TRUE	5.16667
NCRNA00176	19	82	-2.10962	2.62702e-10	4.21483e-09	1.9589e-09	TRUE	4.31579
RRAS2	26	87	-1.7425	1.24516e-08	1.53029e-07	7.11223e-08	TRUE	3.34615
TEX15	113	359	-1.66766	0	0	0	TRUE	3.17699
PPA1	211	650	-1.6232	0	0	0	TRUE	3.08057
GABPA	31	94	-1.60039	2.79337e-08	3.23767e-07	1.50475e-07	TRUE	3.03226
PTPLB	36	106	-1.558	7.55699e-09	9.57639e-08	4.45075e-08	TRUE	2.94444
CLK1	187	526	-1.49202	0	0	0	TRUE	2.81283
CLK4	94	263	-1.48433	0	0	0	TRUE	2.79787
RPL7L1	40	110	-1.45943	2.21401e-08	2.62073e-07	1.21802e-07	TRUE	2.75
UHMK1	46	124	-1.43063	5.00713e-09	6.57979e-08	3.05804e-08	TRUE	2.69565
CASD1	55	148	-1.42809	1.78534e-10	2.93202e-09	1.3627e-09	TRUE	2.69091
ZNF117	42	110	-1.38904	7.49135e-08	8.08795e-07	3.75898e-07	TRUE	2.61905
CCDC15	43	112	-1.38109	6.5642e-08	7.1657e-07	3.33035e-07	TRUE	2.60465
EIF4E	160	411	-1.36107	0	0	0	TRUE	2.56875
SMPD3	59	151	-1.35576	6.39462e-10	9.63056e-09	4.47593e-09	TRUE	2.55932
LYPLA1	78	198	-1.34395	2.10654e-12	4.56334e-11	2.12087e-11	TRUE	2.53846
TIPARP	135	338	-1.32406	0	0	0	TRUE	2.5037
NUP62CL	78	194	-1.31451	8.39373e-12	1.65712e-10	7.70167e-11	TRUE	2.48718
SC5DL	1010	2483	-1.29773	0	0	0	TRUE	2.45842
PTAR1	557	1368	-1.29632	0	0	0	TRUE	2.45601
SLC35A3	68	167	-1.29624	3.69811e-10	5.78332e-09	2.68787e-09	TRUE	2.45588
LOC221442	52	126	-1.27684	7.62095e-08	8.21194e-07	3.81661e-07	TRUE	2.42308
FAM73A	104	250	-1.26534	5.63993e-14	1.50717e-12	7.00477e-13	TRUE	2.40385
DPY19L4	137	327	-1.25511	0	0	0	TRUE	2.38686
PIK3R3	663	1579	-1.25193	0	0	0	TRUE	2.3816
CCDC91	62	146	-1.23563	1.78546e-08	2.15312e-07	1.00069e-07	TRUE	2.35484
KBTBD8	95	223	-1.23104	3.96438e-12	8.16438e-11	3.7945e-11	TRUE	2.34737
NXT2	122	286	-1.22913	4.21885e-15	1.30126e-13	6.04219e-14	TRUE	2.34426
CYP1B1	81	189	-1.22239	2.15123e-10	3.49172e-09	1.62282e-09	TRUE	2.33333
ZNF267	98	228	-1.21818	3.53817e-12	7.35922e-11	3.41947e-11	TRUE	2.32653
ZNF302	80	186	-1.21723	3.44548e-10	5.40342e-09	2.51092e-09	TRUE	2.325
NFYB	145	337	-1.2167	0	0	0	TRUE	2.32414
RPS6KA6	158	364	-1.20401	0	0	0	TRUE	2.3038
CRISPLD1	87	200	-1.20091	1.22692e-10	2.0533e-09	9.543e-10	TRUE	2.29885
OTUD6B	112	256	-1.19265	4.51084e-13	1.07475e-11	4.99504e-12	TRUE	2.28571
MAPKSP1	248	564	-1.18536	0	0	0	TRUE	2.27419
KIAA0776	176	400	-1.18442	0	0	0	TRUE	2.27273
EEF1A1	317	715	-1.17346	0	0	0	TRUE	2.25552
TPMT	119	268	-1.17127	2.99316e-13	7.31944e-12	3.40181e-12	TRUE	2.2521
SGTB	178	397	-1.15726	0	0	0	TRUE	2.23034
MBNL2	132	293	-1.15036	5.83977e-14	1.5556e-12	7.22984e-13	TRUE	2.2197
RCN2	608	1343	-1.14332	0	0	0	TRUE	2.20888
BRMS1L	113	249	-1.13982	6.39688e-12	1.2826e-10	5.96106e-11	TRUE	2.20354
CASC5	254	557	-1.13285	0	0	0	TRUE	2.19291
C17orf104	81	176	-1.11958	1.28287e-08	1.57316e-07	7.31147e-08	TRUE	2.17284
FAM169A	205	444	-1.11494	0	0	0	TRUE	2.16585
ERI1	140	303	-1.11389	1.07803e-13	2.77003e-12	1.28741e-12	TRUE	2.16429
ARL5B	148	320	-1.11247	2.37588e-14	6.72575e-13	3.12588e-13	TRUE	2.16216
HINT3	305	656	-1.10489	0	0	0	TRUE	2.15082
PERP	596	1280	-1.10276	0	0	0	TRUE	2.14765
C4orf32	194	416	-1.10053	0	0	0	TRUE	2.14433
SYPL1	356	763	-1.09981	0	0	0	TRUE	2.14326
NUS1	130	278	-1.09657	2.18026e-12	4.68657e-11	2.17814e-11	TRUE	2.13846
EPHA3	114	241	-1.08	1.09771e-10	1.86132e-09	8.64447e-10	TRUE	2.11404
ARL5A	153	323	-1.078	8.75966e-14	2.28243e-12	1.06048e-12	TRUE	2.11111
CHML	622	1312	-1.07678	0	0	0	TRUE	2.10932
SNRPG	243	512	-1.07519	0	0	0	TRUE	2.107
RMI1	126	265	-1.07257	1.74276e-11	3.31145e-10	1.53904e-10	TRUE	2.10317
SP4	81	170	-1.06954	7.70097e-08	8.29282e-07	3.8542e-07	TRUE	2.09877
SRP9	360	754	-1.06657	0	0	0	TRUE	2.09444
SPAST	109	228	-1.06471	5.67884e-10	8.62255e-09	4.00744e-09	TRUE	2.09174
NECAB1	99	207	-1.06413	3.54928e-09	4.76527e-08	2.21472e-08	TRUE	2.09091
AP1AR	244	506	-1.05226	0	0	0	TRUE	2.07377
GSTA4	259	537	-1.05197	0	0	0	TRUE	2.07336
MIER3	195	404	-1.05088	3.33067e-16	1.14817e-14	5.30888e-15	TRUE	2.07179
BCLAF1	1608	3331	-1.05069	0	0	0	TRUE	2.07152
MAP9	210	435	-1.05063	0	0	0	TRUE	2.07143
THAP5	108	223	-1.04601	1.57297e-09	2.2302e-08	1.03652e-08	TRUE	2.06481
C9orf41	94	194	-1.04532	1.83082e-08	2.20147e-07	1.02316e-07	TRUE	2.06383
ZNF260	114	235	-1.04363	6.22503e-10	9.40058e-09	4.36904e-09	TRUE	2.0614
ITGAV	282	581	-1.04284	0	0	0	TRUE	2.06028
MOBKL3	204	419	-1.03838	2.22045e-16	7.77482e-15	3.5834e-15	TRUE	2.05392
SCOC	357	731	-1.03395	0	0	0	TRUE	2.04762
C14orf147	300	613	-1.03092	0	0	0	TRUE	2.04333
MOCS2	328	670	-1.03047	0	0	0	TRUE	2.04268
CNIH	443	902	-1.02582	0	0	0	TRUE	2.03612
KRR1	213	433	-1.02351	1.11022e-16	4.0531e-15	1.82586e-15	TRUE	2.03286
CYP51A1	246	498	-1.01749	0	0	0	TRUE	2.02439
OSBPL8	249	504	-1.01728	0	0	0	TRUE	2.0241
RCHY1	173	349	-1.01245	2.15827e-13	5.34829e-12	2.48569e-12	TRUE	2.01734
SLC25A46	295	595	-1.01217	0	0	0	TRUE	2.01695
USP53	260	523	-1.0083	0	0	0	TRUE	2.01154
CALCB	291	585	-1.00742	0	0	0	TRUE	2.01031
ZNF326	530	1065	-1.00679	0	0	0	TRUE	2.00943
USP45	134	269	-1.00537	1.52323e-10	2.5214e-09	1.17099e-09	TRUE	2.00746
MOBKL1A	260	518	-0.99444	0	0	0	TRUE	1.99231
CCNG1	1449	2885	-0.993514	0	0	0	TRUE	1.99103
NDUFA5	218	434	-0.993367	8.88178e-16	2.9087e-14	1.34395e-14	TRUE	1.99083
MBLAC2	104	207	-0.993047	2.76292e-08	3.20683e-07	1.49042e-07	TRUE	1.99038
C10orf88	118	234	-0.987722	4.12923e-09	5.47787e-08	2.54591e-08	TRUE	1.98305
HSPA13	719	1425	-0.986898	0	0	0	TRUE	1.98192
ZNF518A	413	817	-0.984194	0	0	0	TRUE	1.97821
NUDT10	175	346	-0.983417	1.07125e-12	2.41133e-11	1.1207e-11	TRUE	1.97714
SHPRH	226	446	-0.980721	7.77156e-16	2.57797e-14	1.19222e-14	TRUE	1.97345
NAA16	139	274	-0.979091	2.75237e-10	4.39905e-09	2.04452e-09	TRUE	1.97122
APPL1	569	1120	-0.976998	0	0	0	TRUE	1.96837
ORC4L	152	299	-0.976074	4.84269e-11	8.6137e-10	4.00333e-10	TRUE	1.96711
CCNT2	373	733	-0.974638	0	0	0	TRUE	1.96515
RPL31	548	1076	-0.97343	0	0	0	TRUE	1.9635
LIN28B	862	1691	-0.972117	0	0	0	TRUE	1.96172
FANCM	177	346	-0.967023	2.29794e-12	4.92054e-11	2.28688e-11	TRUE	1.9548
SOCS4	441	862	-0.966909	0	0	0	TRUE	1.95465
GDAP1	367	717	-0.966193	0	0	0	TRUE	1.95368
MAP4K3	103	201	-0.964551	9.57673e-08	1.01043e-06	4.69609e-07	TRUE	1.95146
MAP2K1	311	606	-0.962403	0	0	0	TRUE	1.94855
PJA2	804	1565	-0.960895	0	0	0	TRUE	1.94652
SKA2	730	1420	-0.959923	0	0	0	TRUE	1.94521
CDK1	808	1571	-0.959256	0	0	0	TRUE	1.94431
RTKN2	203	394	-0.956716	1.22125e-13	3.07651e-12	1.42985e-12	TRUE	1.94089
C4orf46	307	595	-0.954651	0	0	0	TRUE	1.93811
YES1	367	711	-0.954069	0	0	0	TRUE	1.93733
PI4K2B	223	431	-0.950644	1.25455e-14	3.65681e-13	1.69955e-13	TRUE	1.93274
MANEA	137	264	-0.946362	1.85219e-09	2.57793e-08	1.19813e-08	TRUE	1.92701
KLHL23	204	393	-0.94596	2.29594e-13	5.65587e-12	2.62864e-12	TRUE	1.92647
HMGN5	378	728	-0.945552	0	0	0	TRUE	1.92593
CENPK	158	304	-0.944147	1.2269e-10	2.05533e-09	9.543e-10	TRUE	1.92405
ZNF204P	196	377	-0.943711	7.82485e-13	1.80512e-11	8.38953e-12	TRUE	1.92347
PPIL4	298	573	-0.943223	0	0	0	TRUE	1.92282
SNX4	220	423	-0.943154	3.33067e-14	9.28695e-13	4.31623e-13	TRUE	1.92273
BCKDHB	142	273	-0.94301	1.11235e-09	1.60575e-08	7.46291e-09	TRUE	1.92254
UQCRB	543	1040	-0.937559	0	0	0	TRUE	1.91529
CDC7	1238	2371	-0.937484	0	0	0	TRUE	1.91519
CCDC82	183	350	-0.935511	7.44316e-12	1.48525e-10	6.9029e-11	TRUE	1.91257
RNF160	258	493	-0.934217	4.44089e-16	1.51371e-14	7.00657e-15	TRUE	1.91085
EHHADH	140	267	-0.931413	2.54888e-09	3.49806e-08	1.62577e-08	TRUE	1.90714
GNB4	395	753	-0.930797	0	0	0	TRUE	1.90633
TRIM2	344	654	-0.926882	0	0	0	TRUE	1.90116
NAP1L1	2406	4571	-0.925873	0	0	0	TRUE	1.89983
TMEM123	1292	2453	-0.924941	0	0	0	TRUE	1.89861
NR1D2	445	843	-0.921727	0	0	0	TRUE	1.89438
ZBTB38	122	231	-0.921012	4.10835e-08	4.6489e-07	2.16064e-07	TRUE	1.89344
BIRC2	352	666	-0.919947	0	0	0	TRUE	1.89205
TRUB1	222	419	-0.916391	1.90736e-13	4.76185e-12	2.21313e-12	TRUE	1.88739
NCKAP1	552	1040	-0.913843	0	0	0	TRUE	1.88406
PGAP1	299	563	-0.912989	0	0	0	TRUE	1.88294
DNHD1	191	358	-0.906387	1.68138e-11	3.20575e-10	1.48991e-10	TRUE	1.87435
TMED5	1061	1988	-0.905893	0	0	0	TRUE	1.8737
CHM	204	382	-0.905003	3.82117e-12	7.89865e-11	3.671e-11	TRUE	1.87255
TMED7	255	477	-0.903492	9.32587e-15	2.77648e-13	1.29041e-13	TRUE	1.87059
ZNF449	267	499	-0.9022	2.44249e-15	7.72623e-14	3.59087e-14	TRUE	1.86891
OLA1	164	306	-0.899836	6.31475e-10	9.51886e-09	4.42401e-09	TRUE	1.86585
MRPL42	588	1096	-0.89836	0	0	0	TRUE	1.86395
CCNG2	455	848	-0.898198	0	0	0	TRUE	1.86374
RAB33B	131	244	-0.897314	3.65934e-08	4.18618e-07	1.94558e-07	TRUE	1.8626
WDR52	130	242	-0.896495	4.26825e-08	4.81028e-07	2.23564e-07	TRUE	1.86154
GJA1	308	573	-0.895605	0	0	0	TRUE	1.86039
MOSPD1	193	359	-0.895383	2.62479e-11	4.86562e-10	2.26136e-10	TRUE	1.8601
RDX	456	846	-0.891624	0	0	0	TRUE	1.85526
HOOK1	428	792	-0.88789	0	0	0	TRUE	1.85047
SFRS11	2062	3813	-0.886882	0	0	0	TRUE	1.84918
LRRC40	297	549	-0.886343	3.33067e-16	1.14817e-14	5.30888e-15	TRUE	1.84848
DSTN	685	1263	-0.882679	0	0	0	TRUE	1.8438
LARP4	505	931	-0.882498	0	0	0	TRUE	1.84356
CENPE	766	1411	-0.881302	0	0	0	TRUE	1.84204
SLC5A3	494	909	-0.879769	0	0	0	TRUE	1.84008
PSPH	181	333	-0.879532	2.67689e-10	4.29072e-09	1.99262e-09	TRUE	1.83978
FAM135A	149	274	-0.878864	1.03062e-08	1.28076e-07	5.95249e-08	TRUE	1.83893
DEPDC1	514	945	-0.878546	0	0	0	TRUE	1.83852
ENPP4	172	316	-0.877516	8.24359e-10	1.21737e-08	5.65789e-09	TRUE	1.83721
HRSP12	152	279	-0.876194	8.33483e-09	1.05063e-07	4.88294e-08	TRUE	1.83553
SFRS13A	602	1104	-0.874905	0	0	0	TRUE	1.83389
LNX2	135	247	-0.871552	6.8623e-08	7.46671e-07	3.47025e-07	TRUE	1.82963
FAM188A	256	468	-0.870365	1.20237e-13	3.03813e-12	1.41201e-12	TRUE	1.82812
LYSMD3	240	438	-0.867896	8.29226e-13	1.90768e-11	8.86617e-12	TRUE	1.825
MIB1	1076	1962	-0.866647	0	0	0	TRUE	1.82342
OXR1	147	268	-0.866417	2.28384e-08	2.69384e-07	1.252e-07	TRUE	1.82313
PREPL	777	1414	-0.863796	0	0	0	TRUE	1.81982
DCK	199	362	-0.863221	9.56929e-11	1.64093e-09	7.62642e-10	TRUE	1.8191
RSL24D1	490	891	-0.862644	0	0	0	TRUE	1.81837
ZNF192	279	507	-0.861721	2.03171e-14	5.83051e-13	2.70981e-13	TRUE	1.8172
ITGB3BP	448	814	-0.86153	0	0	0	TRUE	1.81696
STK38L	289	524	-0.858497	9.21485e-15	2.74833e-13	1.27732e-13	TRUE	1.81315
NUDT11	331	600	-0.858131	1.11022e-16	4.0531e-15	1.82586e-15	TRUE	1.81269
RBMXL1	318	576	-0.857042	4.44089e-16	1.51371e-14	7.00657e-15	TRUE	1.81132
LOC284441	288	521	-0.855215	1.36557e-14	3.95626e-13	1.83713e-13	TRUE	1.80903
PPP2R3C	168	303	-0.850857	5.08297e-09	6.65849e-08	3.09288e-08	TRUE	1.80357
ZNF33B	253	456	-0.849896	7.93476e-13	1.82795e-11	8.49564e-12	TRUE	1.80237
ALS2CR4	531	956	-0.848299	0	0	0	TRUE	1.80038
NR3C1	234	420	-0.843881	8.56326e-12	1.68263e-10	7.82025e-11	TRUE	1.79487
ZEB1	324	581	-0.842544	1.11022e-15	3.59708e-14	1.66694e-14	TRUE	1.79321
KBTBD6	362	649	-0.842229	0	0	0	TRUE	1.79282
ATR	299	536	-0.842088	1.36557e-14	3.95626e-13	1.83713e-13	TRUE	1.79264
ALKBH8	178	319	-0.841679	2.90324e-09	3.95836e-08	1.8397e-08	TRUE	1.79213
FAR1	930	1665	-0.84022	0	0	0	TRUE	1.79032
GNRHR2	400	716	-0.83996	0	0	0	TRUE	1.79
STAG2	2489	4454	-0.839535	0	0	0	TRUE	1.78947
PHF6	1304	2331	-0.838005	0	0	0	TRUE	1.78758
KITLG	153	273	-0.835369	4.92127e-08	5.51275e-07	2.56212e-07	TRUE	1.78431
SACS	658	1173	-0.834044	0	0	0	TRUE	1.78267
BRIP1	230	410	-0.83399	2.49318e-11	4.64227e-10	2.15756e-10	TRUE	1.78261
LRRC58	654	1165	-0.832967	0	0	0	TRUE	1.78135
RNF138	526	935	-0.829904	0	0	0	TRUE	1.77757
YTHDF3	530	942	-0.829735	0	0	0	TRUE	1.77736
MST4	754	1336	-0.825284	0	0	0	TRUE	1.77188
UBE2J1	376	666	-0.82479	0	0	0	TRUE	1.77128
KIAA1430	249	439	-0.818075	1.17524e-11	2.28774e-10	1.06326e-10	TRUE	1.76305
ST13	560	986	-0.816161	0	0	0	TRUE	1.76071
AKT3	541	952	-0.815333	0	0	0	TRUE	1.7597
AGPS	707	1243	-0.814044	0	0	0	TRUE	1.75813
ARHGAP11A	370	650	-0.812914	2.22045e-16	7.77482e-15	3.5834e-15	TRUE	1.75676
TOPORS	382	671	-0.81274	1.11022e-16	4.0531e-15	1.82586e-15	TRUE	1.75654
RB1	282	495	-0.811733	8.62643e-13	1.97098e-11	9.16039e-12	TRUE	1.75532
DMTF1	706	1239	-0.811436	0	0	0	TRUE	1.75496
CARD8	159	279	-0.811238	8.07369e-08	8.66068e-07	4.02517e-07	TRUE	1.75472
ZBTB10	273	479	-0.811125	2.07456e-12	4.50577e-11	2.09411e-11	TRUE	1.75458
FAM116A	402	705	-0.810428	0	0	0	TRUE	1.75373
SMCHD1	426	746	-0.808322	0	0	0	TRUE	1.75117
UBE2W	160	280	-0.807355	8.74446e-08	9.32035e-07	4.33176e-07	TRUE	1.75
DYNLT3	195	341	-0.806298	3.67911e-09	4.92376e-08	2.28838e-08	TRUE	1.74872
SLC7A11	198	346	-0.805272	2.95593e-09	4.02692e-08	1.87156e-08	TRUE	1.74747
TMEFF1	162	283	-0.804808	8.1498e-08	8.73671e-07	4.0605e-07	TRUE	1.74691
TAF1	189	330	-0.80408	7.15777e-09	9.10504e-08	4.23168e-08	TRUE	1.74603
NT5C2	242	422	-0.802236	6.56347e-11	1.1515e-09	5.35176e-10	TRUE	1.7438
PDP2	187	326	-0.801834	9.63866e-09	1.20408e-07	5.5961e-08	TRUE	1.74332
PAPOLG	194	338	-0.800967	5.35685e-09	6.96266e-08	3.23599e-08	TRUE	1.74227
ISOC1	547	949	-0.794867	0	0	0	TRUE	1.73492
CD2AP	237	411	-0.794251	1.71925e-10	2.82906e-09	1.31484e-09	TRUE	1.73418
WDR35	379	657	-0.793696	6.66134e-16	2.22961e-14	1.03417e-14	TRUE	1.73351
C4orf21	273	473	-0.792939	7.99905e-12	1.5867e-10	7.37439e-11	TRUE	1.7326
CEP135	179	310	-0.792309	3.16395e-08	3.64947e-07	1.69614e-07	TRUE	1.73184
BNIP2	205	355	-0.792195	3.23431e-09	4.38114e-08	2.03619e-08	TRUE	1.73171
CMBL	245	424	-0.791283	1.03349e-10	1.76136e-09	8.18614e-10	TRUE	1.73061
RHOBTB3	410	709	-0.790162	1.11022e-16	4.0531e-15	1.82586e-15	TRUE	1.72927
SMARCAD1	470	812	-0.788819	0	0	0	TRUE	1.72766
PLDN	301	520	-0.788748	9.70002e-13	2.19823e-11	1.02166e-11	TRUE	1.72757
PLS1	187	323	-0.788496	1.89416e-08	2.26946e-07	1.05476e-07	TRUE	1.72727
CPSF6	1239	2140	-0.788435	0	0	0	TRUE	1.7272
ATG4C	178	307	-0.786361	4.59115e-08	5.16373e-07	2.39991e-07	TRUE	1.72472
ERCC6L	472	814	-0.786242	0	0	0	TRUE	1.72458
PPIG	601	1036	-0.785587	0	0	0	TRUE	1.72379
ATAD5	462	796	-0.784876	0	0	0	TRUE	1.72294
ZFAND1	308	530	-0.783062	8.41993e-13	1.93438e-11	8.9903e-12	TRUE	1.72078
ABCE1	555	954	-0.781501	0	0	0	TRUE	1.71892
CRLF3	234	402	-0.780687	5.20329e-10	7.95108e-09	3.69537e-09	TRUE	1.71795
SMAD5	710	1219	-0.779807	0	0	0	TRUE	1.7169
TRIM23	173	297	-0.779691	9.6198e-08	1.01433e-06	4.71423e-07	TRUE	1.71676
DMXL1	180	309	-0.77961	5.33055e-08	5.91567e-07	2.74938e-07	TRUE	1.71667
SS18	790	1356	-0.779433	0	0	0	TRUE	1.71646
ASPM	1107	1900	-0.779344	0	0	0	TRUE	1.71635
C5orf24	591	1014	-0.778828	0	0	0	TRUE	1.71574
EFHC1	331	567	-0.776518	2.11386e-13	5.24603e-12	2.43816e-12	TRUE	1.71299
ZBTB33	892	1527	-0.775584	0	0	0	TRUE	1.71188
RRM2B	239	409	-0.77509	4.83532e-10	7.42958e-09	3.453e-09	TRUE	1.7113
ACTR6	271	463	-0.772719	4.01816e-11	7.25528e-10	3.37199e-10	TRUE	1.70849
AASDH	250	427	-0.772308	2.32306e-10	3.74877e-09	1.74229e-09	TRUE	1.708
CLIC4	960	1638	-0.770829	0	0	0	TRUE	1.70625
KIAA0586	258	440	-0.770132	1.39031e-10	2.31515e-09	1.076e-09	TRUE	1.70543
BBS10	220	375	-0.769387	3.24648e-09	4.3905e-08	2.039e-08	TRUE	1.70455
CWC22	229	390	-0.768127	1.67559e-09	2.36366e-08	1.09854e-08	TRUE	1.70306
CD302	312	531	-0.767166	2.16083e-12	4.65679e-11	2.1643e-11	TRUE	1.70192
AKAP11	399	679	-0.767023	1.9984e-15	6.33345e-14	2.94356e-14	TRUE	1.70175
FKTN	221	376	-0.766686	3.48725e-09	4.6971e-08	2.18304e-08	TRUE	1.70136
PRKD3	664	1128	-0.764512	0	0	0	TRUE	1.6988
RAB18	244	414	-0.76275	6.91468e-10	1.03207e-08	4.79669e-09	TRUE	1.69672
OSGIN2	211	358	-0.762717	9.72356e-09	1.21287e-07	5.63696e-08	TRUE	1.69668
MAN1A2	267	453	-0.762671	1.10831e-10	1.87549e-09	8.71657e-10	TRUE	1.69663
RAP2C	596	1011	-0.762399	0	0	0	TRUE	1.69631
YOD1	385	653	-0.762225	9.88098e-15	2.91576e-13	1.35514e-13	TRUE	1.6961
NAA38	526	892	-0.761981	0	0	0	TRUE	1.69582
NAA50	1733	2937	-0.761072	0	0	0	TRUE	1.69475
NBEA	190	322	-0.761061	5.68976e-08	6.27263e-07	2.91529e-07	TRUE	1.69474
SOAT1	307	520	-0.760273	5.52292e-12	1.1154e-10	5.18398e-11	TRUE	1.69381
QKI	975	1651	-0.759866	0	0	0	TRUE	1.69333
KIAA1033	251	425	-0.759775	4.77424e-10	7.34249e-09	3.41252e-09	TRUE	1.69323
ZYG11B	368	623	-0.759526	4.84057e-14	1.30821e-12	6.08007e-13	TRUE	1.69293
LOC647979	598	1012	-0.758992	0	0	0	TRUE	1.69231
PPM1E	364	616	-0.758992	6.9611e-14	1.83093e-12	8.5095e-13	TRUE	1.69231
EXOC5	286	484	-0.758992	3.17972e-11	5.81047e-10	2.70049e-10	TRUE	1.69231
CBR4	450	761	-0.757971	1.11022e-16	4.0531e-15	1.82586e-15	TRUE	1.69111
NUDCD1	197	333	-0.757327	3.91707e-08	4.44148e-07	2.06424e-07	TRUE	1.69036
MXRA7	381	644	-0.75727	2.16493e-14	6.1757e-13	2.86779e-13	TRUE	1.69029
CEP290	316	534	-0.756915	3.54172e-12	7.35744e-11	3.41947e-11	TRUE	1.68987
AGL	396	669	-0.756506	7.21645e-15	2.1717e-13	1.00932e-13	TRUE	1.68939
API5	344	581	-0.75613	4.2677e-13	1.0256e-11	4.7666e-12	TRUE	1.68895
GPAM	257	434	-0.755927	3.80785e-10	5.9438e-09	2.76246e-09	TRUE	1.68872
TNKS2	518	874	-0.754681	0	0	0	TRUE	1.68726
FIGNL1	668	1127	-0.754568	0	0	0	TRUE	1.68713
2010-09-07	198	334	-0.754348	4.19933e-08	4.7422e-07	2.204e-07	TRUE	1.68687
ETAA1	284	479	-0.754135	5.25482e-11	9.29724e-10	4.32102e-10	TRUE	1.68662
FBXO11	462	779	-0.75373	1.11022e-16	4.0531e-15	1.82586e-15	TRUE	1.68615
SH3BGRL	337	568	-0.753142	9.44245e-13	2.14568e-11	9.97235e-12	TRUE	1.68546
PSD3	285	480	-0.752072	5.62725e-11	9.91418e-10	4.60774e-10	TRUE	1.68421
FYTTD1	685	1153	-0.751217	0	0	0	TRUE	1.68321
FAM126A	486	818	-0.751145	0	0	0	TRUE	1.68313
ATP11C	569	957	-0.75009	0	0	0	TRUE	1.6819
USP14	579	973	-0.748876	0	0	0	TRUE	1.68048
NCRNA00201	2496	4194	-0.748709	0	0	0	TRUE	1.68029
SMARCA5	1004	1685	-0.746989	0	0	0	TRUE	1.67829
PCMTD2	494	829	-0.746861	0	0	0	TRUE	1.67814
RALGPS2	347	581	-0.743603	9.84546e-13	2.22515e-11	1.03417e-11	TRUE	1.67435
ZDBF2	340	569	-0.742894	1.76115e-12	3.85513e-11	1.79172e-11	TRUE	1.67353
PPIP5K2	208	348	-0.742504	3.53977e-08	4.06053e-07	1.88718e-07	TRUE	1.67308
CCNC	434	726	-0.742275	1.77636e-15	5.67279e-14	2.63651e-14	TRUE	1.67281
FBXO3	268	448	-0.741266	4.25089e-10	6.58611e-09	3.06098e-09	TRUE	1.67164
HSP90AA1	4561	7620	-0.740441	0	0	0	TRUE	1.67069
DIAPH3	352	588	-0.740241	9.02722e-13	2.05693e-11	9.55983e-12	TRUE	1.67045
SNRK	209	349	-0.739724	3.78467e-08	4.30303e-07	1.99989e-07	TRUE	1.66986
ASAH1	215	359	-0.739647	2.42864e-08	2.84454e-07	1.32204e-07	TRUE	1.66977
ZNF37A	205	342	-0.738372	5.45866e-08	6.03779e-07	2.80499e-07	TRUE	1.66829
KIAA0528	428	714	-0.738313	3.9968e-15	1.23734e-13	5.74538e-14	TRUE	1.66822
SLC30A9	1042	1736	-0.736412	0	0	0	TRUE	1.66603
PRKAR2B	242	403	-0.735773	4.08432e-09	5.4226e-08	2.52023e-08	TRUE	1.66529
KIAA1524	212	353	-0.735604	3.74128e-08	4.26241e-07	1.98101e-07	TRUE	1.66509
MAP4K5	274	456	-0.734858	4.15546e-10	6.45023e-09	2.99783e-09	TRUE	1.66423
PCGF5	223	371	-0.734375	1.77922e-08	2.1487e-07	9.98637e-08	TRUE	1.66368
C21orf91	237	394	-0.733309	6.78721e-09	8.67329e-08	4.03103e-08	TRUE	1.66245
DCAF17	245	407	-0.732247	4.03374e-09	5.35971e-08	2.491e-08	TRUE	1.66122
HSPA4L	410	681	-0.732031	2.79776e-14	7.8667e-13	3.65615e-13	TRUE	1.66098
TRAPPC6B	391	649	-0.73105	1.19793e-13	3.03149e-12	1.40892e-12	TRUE	1.65985
PIK3C2A	370	614	-0.730713	5.55e-13	1.30927e-11	6.085e-12	TRUE	1.65946
LOC442454	865	1435	-0.730279	0	0	0	TRUE	1.65896
TAF9B	489	811	-0.729867	1.11022e-16	4.0531e-15	1.82586e-15	TRUE	1.65849
ZBTB24	263	436	-0.729265	1.31892e-09	1.88601e-08	8.76547e-09	TRUE	1.65779
SNRNP48	575	952	-0.7274	0	0	0	TRUE	1.65565
ZFYVE16	261	432	-0.726982	1.75392e-09	2.46582e-08	1.14602e-08	TRUE	1.65517
VEZT	394	652	-0.726676	1.45106e-13	3.64446e-12	1.69381e-12	TRUE	1.65482
RIOK3	327	541	-0.726338	1.69574e-11	3.22945e-10	1.50093e-10	TRUE	1.65443
LANCL1	1128	1865	-0.725409	0	0	0	TRUE	1.65337
CHRNA5	298	492	-0.723346	1.62943e-10	2.6839e-09	1.24738e-09	TRUE	1.65101
GNA13	722	1192	-0.723313	0	0	0	TRUE	1.65097
RNF170	214	353	-0.722057	6.45671e-08	7.05298e-07	3.27796e-07	TRUE	1.64953
CHMP5	282	465	-0.721536	5.64846e-10	8.59204e-09	3.99326e-09	TRUE	1.64894
ASCC3	635	1047	-0.721433	0	0	0	TRUE	1.64882
OPA1	740	1220	-0.721284	0	0	0	TRUE	1.64865
TMEM106B	217	357	-0.718229	6.35342e-08	6.96291e-07	3.2361e-07	TRUE	1.64516
BACH1	366	602	-0.71792	2.21123e-12	4.74704e-11	2.20625e-11	TRUE	1.64481
GOLT1B	261	429	-0.716928	3.24666e-09	4.38719e-08	2.039e-08	TRUE	1.64368
MYCBP	311	511	-0.716409	1.08182e-10	1.83623e-09	8.53414e-10	TRUE	1.64309
OSBPL3	310	509	-0.715397	1.24558e-10	2.08036e-09	9.66875e-10	TRUE	1.64194
SWAP70	290	476	-0.714909	5.05021e-10	7.73132e-09	3.59323e-09	TRUE	1.64138
ATM	420	689	-0.714115	7.87148e-14	2.05743e-12	9.56215e-13	TRUE	1.64048
FAM8A1	545	894	-0.714019	0	0	0	TRUE	1.64037
NANP	239	392	-0.713843	1.75832e-08	2.12654e-07	9.88337e-08	TRUE	1.64017
RFC3	450	738	-0.713696	1.07692e-14	3.1611e-13	1.46916e-13	TRUE	1.64
TPD52	605	992	-0.713405	0	0	0	TRUE	1.63967
GFPT1	523	856	-0.7108	1.11022e-16	4.0531e-15	1.82586e-15	TRUE	1.63671
ERCC4	217	355	-0.710124	9.5607e-08	1.01065e-06	4.69443e-07	TRUE	1.63594
WDHD1	653	1067	-0.708405	0	0	0	TRUE	1.634
SDCCAG1	336	549	-0.708345	3.63289e-11	6.60246e-10	3.06858e-10	TRUE	1.63393
RPRD1A	2485	4060	-0.708234	0	0	0	TRUE	1.6338
SPCS1	761	1243	-0.707858	0	0	0	TRUE	1.63338
NOC3L	300	490	-0.707819	4.15414e-10	6.45419e-09	2.99783e-09	TRUE	1.63333
ARID4B	695	1135	-0.707607	0	0	0	TRUE	1.63309
ZDHHC17	468	764	-0.707064	6.55032e-15	1.97657e-13	9.1781e-14	TRUE	1.63248
MRE11A	348	568	-0.706804	1.84528e-11	3.47854e-10	1.6167e-10	TRUE	1.63218
INTS2	312	509	-0.70612	2.10637e-10	3.42223e-09	1.59053e-09	TRUE	1.63141
ZZZ3	430	701	-0.705078	9.67004e-14	2.5079e-12	1.16558e-12	TRUE	1.63023
ZNF639	227	370	-0.704833	6.3969e-08	6.9968e-07	3.25185e-07	TRUE	1.62996
CBLL1	389	634	-0.704713	1.47193e-12	3.26484e-11	1.51738e-11	TRUE	1.62982
WDFY1	532	867	-0.704606	1.11022e-16	4.0531e-15	1.82586e-15	TRUE	1.6297
HNRNPH3	2494	4064	-0.704439	0	0	0	TRUE	1.62951
CP110	313	510	-0.704335	2.23699e-10	3.61686e-09	1.68098e-09	TRUE	1.62939
MON2	402	655	-0.704299	6.51257e-13	1.51706e-11	7.05072e-12	TRUE	1.62935
RFK	283	461	-0.703965	1.6538e-09	2.33489e-08	1.08517e-08	TRUE	1.62898
AZI2	285	464	-0.703163	1.52644e-09	2.16606e-08	1.00671e-08	TRUE	1.62807
EIF3E	1594	2594	-0.702527	0	0	0	TRUE	1.62735
SLC35A5	295	480	-0.702319	8.37147e-10	1.23516e-08	5.74058e-09	TRUE	1.62712
TMPO	853	1386	-0.70031	0	0	0	TRUE	1.62485
TMEM167A	707	1148	-0.699341	0	0	0	TRUE	1.62376
FBXO30	313	508	-0.698666	3.33193e-10	5.23026e-09	2.43083e-09	TRUE	1.623
CD46	718	1165	-0.698274	0	0	0	TRUE	1.62256
DNAJC18	240	389	-0.696736	4.18299e-08	4.72694e-07	2.19691e-07	TRUE	1.62083
C1orf27	345	559	-0.696252	5.089e-11	9.02297e-10	4.19355e-10	TRUE	1.62029
VPS13A	316	512	-0.696219	3.26097e-10	5.13334e-09	2.38579e-09	TRUE	1.62025
PNPT1	237	384	-0.696219	5.21873e-08	5.79928e-07	2.69529e-07	TRUE	1.62025
FBXL3	618	1001	-0.695763	0	0	0	TRUE	1.61974
SMC3	741	1200	-0.695489	0	0	0	TRUE	1.61943
NUDT12	239	387	-0.695323	4.81218e-08	5.39779e-07	2.5077e-07	TRUE	1.61925
ATAD1	556	900	-0.69484	1.11022e-16	4.0531e-15	1.82586e-15	TRUE	1.61871
PKN2	812	1314	-0.694414	0	0	0	TRUE	1.61823
FBXO28	604	977	-0.69381	0	0	0	TRUE	1.61755
NPAT	303	490	-0.693464	9.0246e-10	1.32334e-08	6.15041e-09	TRUE	1.61716
CHMP2B	657	1062	-0.692818	0	0	0	TRUE	1.61644
LRRC8B	245	396	-0.692719	3.77188e-08	4.29142e-07	1.99449e-07	TRUE	1.61633
KIF14	448	724	-0.692491	1.03695e-13	2.67477e-12	1.24217e-12	TRUE	1.61607
GXYLT1	414	669	-0.692375	8.87845e-13	2.02579e-11	9.41513e-12	TRUE	1.61594
TSEN15	629	1016	-0.691768	0	0	0	TRUE	1.61526
SMARCA1	1036	1673	-0.691413	0	0	0	TRUE	1.61486
MEAF6	280	452	-0.690896	4.56335e-09	6.02506e-08	2.80023e-08	TRUE	1.61429
POLR2K	259	418	-0.690551	1.75225e-08	2.12073e-07	9.85637e-08	TRUE	1.6139
YAP1	295	476	-0.690247	1.84941e-09	2.57622e-08	1.19733e-08	TRUE	1.61356
SLBP	582	939	-0.690106	0	0	0	TRUE	1.6134
RBM18	243	392	-0.689897	4.98694e-08	5.57136e-07	2.58936e-07	TRUE	1.61317
ZNF367	252	406	-0.688056	3.13139e-08	3.61941e-07	1.68217e-07	TRUE	1.61111
KIF20B	403	649	-0.687439	2.73703e-12	5.77196e-11	2.68259e-11	TRUE	1.61042
C14orf106	318	512	-0.687117	5.42574e-10	8.26832e-09	3.84281e-09	TRUE	1.61006
TTK	397	639	-0.686677	4.2355e-12	8.71199e-11	4.04901e-11	TRUE	1.60957
PPAT	407	655	-0.686466	2.32903e-12	4.97435e-11	2.31189e-11	TRUE	1.60934
EPC2	238	383	-0.686383	8.22044e-08	8.80114e-07	4.09044e-07	TRUE	1.60924
NEDD1	404	650	-0.686084	2.89702e-12	6.09395e-11	2.83085e-11	TRUE	1.60891
RPL15	3201	5148	-0.685489	0	0	0	TRUE	1.60825
SLC26A2	449	722	-0.685283	1.96954e-13	4.90241e-12	2.27846e-12	TRUE	1.60802
TNPO1	1322	2124	-0.684062	0	0	0	TRUE	1.60666
USP1	1663	2671	-0.683592	0	0	0	TRUE	1.60613
CAPZA1	611	980	-0.681609	0	0	0	TRUE	1.60393
LYRM7	420	673	-0.680217	1.83997e-12	4.02241e-11	1.86947e-11	TRUE	1.60238
LOC221710	299	479	-0.67988	2.82326e-09	3.85876e-08	1.79341e-08	TRUE	1.60201
SLC1A3	369	591	-0.679537	4.20983e-11	7.57679e-10	3.51895e-10	TRUE	1.60163
CAND1	1546	2475	-0.678888	0	0	0	TRUE	1.60091
NRAS	1125	1801	-0.678873	0	0	0	TRUE	1.60089
OSBPL9	480	768	-0.678072	6.19504e-14	1.64629e-12	7.64529e-13	TRUE	1.6
PDE12	245	392	-0.678072	8.2731e-08	8.84618e-07	4.11138e-07	TRUE	1.6
ABI1	487	779	-0.677702	4.24105e-14	1.15931e-12	5.38806e-13	TRUE	1.59959
ZNF644	591	945	-0.677156	1.11022e-16	4.0531e-15	1.82586e-15	TRUE	1.59898
GPD2	361	577	-0.676572	8.56956e-11	1.47555e-09	6.85783e-10	TRUE	1.59834
MIER1	552	882	-0.67611	1.11022e-15	3.59708e-14	1.66694e-14	TRUE	1.59783
ANTXR1	473	755	-0.674636	1.32672e-13	3.33717e-12	1.55099e-12	TRUE	1.59619
ATP11B	321	512	-0.673571	1.1479e-09	1.65421e-08	7.68816e-09	TRUE	1.59502
LMOD1	274	437	-0.673457	1.87735e-08	2.25093e-07	1.04615e-07	TRUE	1.59489
EDEM3	461	735	-0.672977	3.16303e-13	7.71224e-12	3.58436e-12	TRUE	1.59436
AASDHPPT	478	762	-0.67278	1.19127e-13	3.01921e-12	1.40322e-12	TRUE	1.59414
ECT2	492	784	-0.672195	5.57332e-14	1.49176e-12	6.93313e-13	TRUE	1.5935
SENP6	359	572	-0.672031	1.3642e-10	2.27394e-09	1.05684e-09	TRUE	1.59331
IMPACT	430	685	-0.671767	2.17593e-12	4.68329e-11	2.17662e-11	TRUE	1.59302
SIKE1	606	965	-0.671211	1.11022e-16	4.0531e-15	1.82586e-15	TRUE	1.59241
ZNF828	276	439	-0.669553	2.09521e-08	2.49424e-07	1.15923e-07	TRUE	1.59058
SFXN1	1209	1922	-0.668794	0	0	0	TRUE	1.58974
UBXN4	967	1537	-0.668529	0	0	0	TRUE	1.58945
CHD9	331	526	-0.668232	9.22036e-10	1.35086e-08	6.27832e-09	TRUE	1.58912
LOC730101	348	553	-0.668192	3.44818e-10	5.40258e-09	2.51092e-09	TRUE	1.58908
CLDN12	528	839	-0.668133	1.06581e-14	3.13402e-13	1.45658e-13	TRUE	1.58902
IPO7	1421	2256	-0.666861	0	0	0	TRUE	1.58761
ATAD2	467	741	-0.666051	4.37206e-13	1.04766e-11	4.86915e-12	TRUE	1.58672
SMC5	335	531	-0.664551	9.45741e-10	1.38196e-08	6.42282e-09	TRUE	1.58507
AP3M1	768	1217	-0.664151	0	0	0	TRUE	1.58464
CDCA7L	281	445	-0.663235	2.26874e-08	2.67792e-07	1.2446e-07	TRUE	1.58363
FNBP1L	261	413	-0.662092	7.60179e-08	8.19658e-07	3.80947e-07	TRUE	1.58238
ATP6AP2	808	1278	-0.661461	0	0	0	TRUE	1.58168
C3orf23	258	408	-0.661198	9.46863e-08	1.00282e-06	4.66075e-07	TRUE	1.5814
PDHX	332	525	-0.661134	1.42105e-09	2.02858e-08	9.42808e-09	TRUE	1.58133
IREB2	1175	1858	-0.66109	0	0	0	TRUE	1.58128
PPTC7	298	471	-0.660415	1.02084e-08	1.26955e-07	5.9004e-08	TRUE	1.58054
FNDC3A	380	600	-0.658963	1.11684e-10	1.88609e-09	8.76586e-10	TRUE	1.57895
MATR3	2538	4007	-0.65883	0	0	0	TRUE	1.5788
B4GALT6	282	445	-0.65811	2.89117e-08	3.3487e-07	1.55635e-07	TRUE	1.57801
RBM41	554	873	-0.656096	9.4369e-15	2.80454e-13	1.30345e-13	TRUE	1.57581
DBT	365	575	-0.655665	3.3108e-10	5.20197e-09	2.41769e-09	TRUE	1.57534
MBTPS2	459	723	-0.655501	1.86584e-12	4.07363e-11	1.89327e-11	TRUE	1.57516
KIF11	779	1227	-0.65544	0	0	0	TRUE	1.5751
C1GALT1C1	461	726	-0.655203	1.71851e-12	3.77666e-11	1.75525e-11	TRUE	1.57484
ALDH1L2	458	721	-0.654652	2.13352e-12	4.60387e-11	2.13971e-11	TRUE	1.57424
PIKFYVE	413	650	-0.654298	2.60977e-11	4.84315e-10	2.25092e-10	TRUE	1.57385
PTEN	272	428	-0.654004	6.38575e-08	6.98917e-07	3.24831e-07	TRUE	1.57353
REEP5	593	933	-0.653845	1.44329e-15	4.63574e-14	2.15452e-14	TRUE	1.57336
GMFB	440	692	-0.653269	6.48903e-12	1.29952e-10	6.03968e-11	TRUE	1.57273
EML4	882	1387	-0.653117	0	0	0	TRUE	1.57256
KLHDC10	283	445	-0.653003	3.6765e-08	4.20294e-07	1.95337e-07	TRUE	1.57244
KLHL8	304	478	-0.652939	1.15885e-08	1.42948e-07	6.64368e-08	TRUE	1.57237
ZBTB11	353	555	-0.65282	7.89758e-10	1.1673e-08	5.4252e-09	TRUE	1.57224
TSPYL2	1575	2476	-0.652659	0	0	0	TRUE	1.57206
TAF1D	411	646	-0.652396	3.41253e-11	6.22227e-10	2.89188e-10	TRUE	1.57178
SCAMP1	607	954	-0.652293	7.77156e-16	2.57797e-14	1.19222e-14	TRUE	1.57166
KLF12	518	814	-0.652077	1.03695e-13	2.67477e-12	1.24217e-12	TRUE	1.57143
ARID2	309	485	-0.650378	1.03323e-08	1.28305e-07	5.96313e-08	TRUE	1.56958
LRP6	566	888	-0.649758	9.99201e-15	2.94332e-13	1.36795e-13	TRUE	1.5689
PHIP	773	1212	-0.648849	0	0	0	TRUE	1.56792
RBM16	650	1019	-0.648642	1.11022e-16	4.0531e-15	1.82586e-15	TRUE	1.56769
SP3	363	569	-0.648459	6.28058e-10	9.4759e-09	4.40405e-09	TRUE	1.56749
PDP1	282	442	-0.648351	5.07176e-08	5.66233e-07	2.63164e-07	TRUE	1.56738
ID4	275	431	-0.648256	7.45796e-08	8.0571e-07	3.74464e-07	TRUE	1.56727
GNPNAT1	781	1224	-0.648209	0	0	0	TRUE	1.56722
CXorf57	1032	1616	-0.646984	0	0	0	TRUE	1.56589
N4BP2L2	623	975	-0.64617	7.77156e-16	2.57797e-14	1.19222e-14	TRUE	1.56501
TMX3	328	513	-0.645263	5.13796e-09	6.70948e-08	3.11832e-08	TRUE	1.56402
CPD	910	1423	-0.644997	0	0	0	TRUE	1.56374
TLK1	433	677	-0.644789	1.9861e-11	3.73557e-10	1.73615e-10	TRUE	1.56351
RPS6KB1	339	530	-0.644707	2.96309e-09	4.03338e-08	1.87457e-08	TRUE	1.56342
TSPAN13	295	461	-0.644052	3.23182e-08	3.71493e-07	1.72656e-07	TRUE	1.56271
SCML1	666	1040	-0.642989	1.11022e-16	4.0531e-15	1.82586e-15	TRUE	1.56156
STT3B	930	1452	-0.642739	0	0	0	TRUE	1.56129
MEF2A	539	841	-0.641821	9.9476e-14	2.57589e-12	1.19718e-12	TRUE	1.5603
CASP8AP2	602	939	-0.641362	3.88578e-15	1.20745e-13	5.60656e-14	TRUE	1.5598
CBFB	472	736	-0.640919	3.60401e-12	7.47753e-11	3.47528e-11	TRUE	1.55932
DSG2	2100	3273	-0.640224	0	0	0	TRUE	1.55857
HS2ST1	863	1345	-0.640174	0	0	0	TRUE	1.55852
FAM122B	1364	2124	-0.63894	0	0	0	TRUE	1.55718
HNRPDL	5346	8324	-0.638817	0	0	0	TRUE	1.55705
DPH3	298	464	-0.638812	3.75647e-08	4.27679e-07	1.98769e-07	TRUE	1.55705
TMEM65	302	470	-0.638112	3.17663e-08	3.66157e-07	1.70176e-07	TRUE	1.55629
ATP6V1C1	543	845	-0.637999	1.21125e-13	3.05594e-12	1.42029e-12	TRUE	1.55617
SLC38A1	1748	2720	-0.637901	0	0	0	TRUE	1.55606
TBX3	502	781	-0.637635	1.03983e-12	2.34377e-11	1.0893e-11	TRUE	1.55578
FEZ2	292	454	-0.636724	5.80239e-08	6.38836e-07	2.96907e-07	TRUE	1.55479
ROCK1	420	653	-0.636694	7.73561e-11	1.33886e-09	6.22254e-10	TRUE	1.55476
USP34	498	774	-0.636188	1.47049e-12	3.26597e-11	1.51738e-11	TRUE	1.55422
WASL	316	491	-0.635798	1.76665e-08	2.13506e-07	9.92297e-08	TRUE	1.5538
DSC3	497	772	-0.635355	1.67732e-12	3.69587e-11	1.7177e-11	TRUE	1.55332
TMEM48	1175	1824	-0.634445	0	0	0	TRUE	1.55234
IBTK	357	554	-0.633962	2.41834e-09	3.32437e-08	1.54504e-08	TRUE	1.55182
NUPL1	493	765	-0.633872	2.37099e-12	5.04463e-11	2.34456e-11	TRUE	1.55172
UBA6	508	788	-0.633367	1.16274e-12	2.60322e-11	1.20988e-11	TRUE	1.55118
ODZ1	2424	3760	-0.633343	0	0	0	TRUE	1.55116
PRKAA2	625	969	-0.63264	3.44169e-15	1.07445e-13	4.99365e-14	TRUE	1.5504
CREB1	471	730	-0.632169	8.47356e-12	1.6709e-10	7.76573e-11	TRUE	1.54989
HNRNPA3	3212	4977	-0.631804	0	0	0	TRUE	1.5495
NUDT15	377	584	-0.631404	1.04814e-09	1.51962e-08	7.06265e-09	TRUE	1.54907
WBP5	388	601	-0.631308	6.04891e-10	9.14288e-09	4.24927e-09	TRUE	1.54897
SFRS12IP1	450	697	-0.631234	2.65792e-11	4.91612e-10	2.28483e-10	TRUE	1.54889
KIAA1715	462	715	-0.63005	1.61269e-11	3.0783e-10	1.43068e-10	TRUE	1.54762
C10orf104	508	784	-0.626025	2.37621e-12	5.0493e-11	2.34673e-11	TRUE	1.54331
IFT80	385	594	-0.625604	1.07382e-09	1.55416e-08	7.22317e-09	TRUE	1.54286
PRKAB2	732	1129	-0.62513	0	0	0	TRUE	1.54235
SGOL2	321	495	-0.624855	2.69595e-08	3.13564e-07	1.45733e-07	TRUE	1.54206
C21orf66	919	1417	-0.624703	0	0	0	TRUE	1.54189
TRIM59	329	507	-0.623898	1.9254e-08	2.30524e-07	1.07139e-07	TRUE	1.54103
SLC19A2	298	459	-0.623182	9.29906e-08	9.87367e-07	4.58892e-07	TRUE	1.54027
PPP1R12A	576	887	-0.622865	1.17573e-13	2.98434e-12	1.38701e-12	TRUE	1.53993
FBXO22	389	599	-0.622786	1.08537e-09	1.56815e-08	7.28819e-09	TRUE	1.53985
ZNF507	430	662	-0.622495	1.49456e-10	2.47886e-09	1.15208e-09	TRUE	1.53953
C6orf115	308	474	-0.621957	6.09824e-08	6.70085e-07	3.11431e-07	TRUE	1.53896
PAQR3	470	723	-0.621335	2.35374e-11	4.40226e-10	2.04601e-10	TRUE	1.5383
TTC14	362	556	-0.619095	5.25391e-09	6.8395e-08	3.17875e-08	TRUE	1.53591
VEZF1	448	688	-0.61891	8.40167e-11	1.44814e-09	6.73042e-10	TRUE	1.53571
ANKRD46	406	623	-0.617752	6.94117e-10	1.0351e-08	4.81077e-09	TRUE	1.53448
AFF4	975	1495	-0.616671	0	0	0	TRUE	1.53333
GOPC	860	1318	-0.615942	0	0	0	TRUE	1.53256
GEN1	357	547	-0.615617	8.45273e-09	1.06388e-07	4.94454e-08	TRUE	1.53221
USP47	735	1126	-0.615391	1.11022e-16	4.0531e-15	1.82586e-15	TRUE	1.53197
PHF20L1	450	689	-0.614579	1.09803e-10	1.85997e-09	8.64447e-10	TRUE	1.53111
MLF1IP	347	531	-0.613776	1.53628e-08	1.87292e-07	8.70462e-08	TRUE	1.53026
FAM199X	613	938	-0.613701	5.55112e-14	1.4882e-12	6.91659e-13	TRUE	1.53018
PPM1A	534	817	-0.613496	2.30993e-12	4.93988e-11	2.29587e-11	TRUE	1.52996
DCLRE1A	351	537	-0.613451	1.29791e-08	1.59044e-07	7.39179e-08	TRUE	1.52991
DYNC2H1	619	947	-0.613425	4.31877e-14	1.17479e-12	5.45999e-13	TRUE	1.52989
CAMSAP1L1	504	771	-0.613307	9.62841e-12	1.88306e-10	8.75179e-11	TRUE	1.52976
APPBP2	612	936	-0.612977	6.30607e-14	1.67181e-12	7.76995e-13	TRUE	1.52941
DNM1L	772	1180	-0.612114	0	0	0	TRUE	1.5285
SRP72	1046	1598	-0.611385	0	0	0	TRUE	1.52772
MKLN1	523	799	-0.611385	4.74765e-12	9.69379e-11	4.50532e-11	TRUE	1.52772
PSMA1	751	1147	-0.610981	1.11022e-16	4.0531e-15	1.82586e-15	TRUE	1.5273
MORC4	651	994	-0.610588	1.35447e-14	3.93433e-13	1.82853e-13	TRUE	1.52688
HSBP1	2277	3476	-0.610294	0	0	0	TRUE	1.52657
SFRS2IP	914	1395	-0.609999	0	0	0	TRUE	1.52626
IFNGR1	346	528	-0.609766	2.08502e-08	2.48388e-07	1.15441e-07	TRUE	1.52601
GNAI3	1139	1738	-0.60966	0	0	0	TRUE	1.5259
DLGAP5	599	914	-0.609638	1.672e-13	4.18676e-12	1.94585e-12	TRUE	1.52588
MRPL35	580	885	-0.609625	4.02789e-13	9.72165e-12	4.51826e-12	TRUE	1.52586
BCAS2	478	729	-0.608908	4.81496e-11	8.5735e-10	3.98465e-10	TRUE	1.5251
CNOT7	320	488	-0.608809	7.4529e-08	8.05685e-07	3.74453e-07	TRUE	1.525
MASTL	343	523	-0.608602	2.58276e-08	3.01448e-07	1.40102e-07	TRUE	1.52478
MTFR1	526	802	-0.608539	5.43166e-12	1.09963e-10	5.11068e-11	TRUE	1.52471
SUB1	858	1308	-0.608313	0	0	0	TRUE	1.52448
ADD3	647	986	-0.607822	2.26485e-14	6.44423e-13	2.99504e-13	TRUE	1.52396
VTA1	838	1277	-0.607736	0	0	0	TRUE	1.52387
IDS	718	1094	-0.607557	8.88178e-16	2.9087e-14	1.34395e-14	TRUE	1.52368
PRMT6	643	979	-0.60649	3.17524e-14	8.88322e-13	4.12859e-13	TRUE	1.52255
EIF4B	888	1352	-0.606464	0	0	0	TRUE	1.52252
PRDX3	1163	1768	-0.604267	0	0	0	TRUE	1.52021
NEK2	333	506	-0.603615	5.58394e-08	6.16819e-07	2.86675e-07	TRUE	1.51952
BTAF1	723	1098	-0.602811	1.33227e-15	4.29152e-14	1.99262e-14	TRUE	1.51867
DENND4C	440	668	-0.602345	4.73207e-10	7.28434e-09	3.38549e-09	TRUE	1.51818
RAB10	1214	1840	-0.599937	0	0	0	TRUE	1.51565
RAB3GAP2	635	962	-0.59928	1.04028e-13	2.67716e-12	1.24424e-12	TRUE	1.51496
PL-5283	841	1273	-0.598055	0	0	0	TRUE	1.51367
TMEM30A	779	1179	-0.597868	2.22045e-16	7.77482e-15	3.5834e-15	TRUE	1.51348
RANBP2	932	1410	-0.597293	0	0	0	TRUE	1.51288
ZFYVE20	669	1012	-0.597131	2.9865e-14	8.38328e-13	3.89624e-13	TRUE	1.51271
NDFIP2	714	1080	-0.597035	4.21885e-15	1.30126e-13	6.04219e-14	TRUE	1.51261
STX7	344	520	-0.596103	5.39387e-08	5.978e-07	2.77835e-07	TRUE	1.51163
ESCO1	563	851	-0.596024	3.51252e-12	7.31498e-11	3.39973e-11	TRUE	1.51155
MYO6	493	745	-0.595653	7.82754e-11	1.35337e-09	6.28996e-10	TRUE	1.51116
ETNK1	869	1313	-0.595439	0	0	0	TRUE	1.51093
UBR1	382	577	-0.594999	1.08115e-08	1.33857e-07	6.2212e-08	TRUE	1.51047
SLC25A36	1103	1666	-0.594956	0	0	0	TRUE	1.51043
CCAR1	1178	1777	-0.593104	0	0	0	TRUE	1.50849
SASS6	362	546	-0.592911	2.9863e-08	3.45649e-07	1.60645e-07	TRUE	1.50829
MYL12A	368	555	-0.592782	2.31679e-08	2.72693e-07	1.26737e-07	TRUE	1.50815
CREBZF	1409	2124	-0.592112	0	0	0	TRUE	1.50745
ARHGEF12	1224	1845	-0.592017	0	0	0	TRUE	1.50735
GLO1	4159	6269	-0.591999	0	0	0	TRUE	1.50733
KLHL12	359	541	-0.591645	3.69171e-08	4.21167e-07	1.95743e-07	TRUE	1.50696
NUDT21	1712	2578	-0.59057	0	0	0	TRUE	1.50584
HELLS	445	670	-0.590356	9.78415e-10	1.42596e-08	6.62733e-09	TRUE	1.50562
PAFAH1B1	1606	2414	-0.587954	0	0	0	TRUE	1.50311
GOLGB1	1334	2004	-0.587124	0	0	0	TRUE	1.50225
RAP2A	692	1039	-0.586352	4.01901e-14	1.10222e-12	5.12273e-13	TRUE	1.50145
DCUN1D4	712	1069	-0.586313	1.74305e-14	5.02805e-13	2.33685e-13	TRUE	1.5014
NEAT1	7002	10512	-0.586198	0	0	0	TRUE	1.50129
SEL1L	389	584	-0.586198	1.45502e-08	1.77775e-07	8.26232e-08	TRUE	1.50129
PPP3R1	1120	1681	-0.585821	0	0	0	TRUE	1.50089
ZNF638	872	1308	-0.584963	0	0	0	TRUE	1.5
C1orf9	490	735	-0.584963	2.24078e-10	3.61949e-09	1.68221e-09	TRUE	1.5
RPPH1	132	50	1.40054	1.13396e-10	1.90922e-09	8.87334e-10	TRUE	0.378788
CRABP2	1238	481	1.3639	0	0	0	TRUE	0.38853
LOC387763	136	56	1.28011	8.84557e-10	1.29937e-08	6.03901e-09	TRUE	0.411765
NMB	108	45	1.26303	6.38252e-08	6.99022e-07	3.24831e-07	TRUE	0.416667
MRPL36	137	62	1.14384	1.56031e-08	1.89944e-07	8.82788e-08	TRUE	0.452555
TNFRSF12A	360	174	1.04891	0	0	0	TRUE	0.483333
MRPL23	576	300	0.941106	0	0	0	TRUE	0.520833
LPPR3	167	87	0.940761	7.83352e-08	8.43012e-07	3.91801e-07	TRUE	0.520958
FXYD5	266	139	0.936341	1.44275e-11	2.76974e-10	1.28727e-10	TRUE	0.522556
ST6GALNAC4	291	153	0.927488	2.35878e-12	5.03146e-11	2.33844e-11	TRUE	0.525773
RMRP	216	114	0.921997	1.82501e-09	2.55074e-08	1.18549e-08	TRUE	0.527778
POU2F1	206	110	0.905141	7.14867e-09	9.10039e-08	4.22952e-08	TRUE	0.533981
PCBP4	200	107	0.902389	1.27892e-08	1.56947e-07	7.29433e-08	TRUE	0.535
PSEN2	312	167	0.901698	1.23768e-12	2.76359e-11	1.28442e-11	TRUE	0.535256
EMP3	209	113	0.88718	9.57066e-09	1.19648e-07	5.56078e-08	TRUE	0.54067
FAM125A	309	169	0.870584	6.24201e-12	1.25305e-10	5.82373e-11	TRUE	0.546926
JUND	861	472	0.867226	0	0	0	TRUE	0.5482
PFKFB4	390	215	0.859137	2.13163e-14	6.09631e-13	2.83334e-13	TRUE	0.551282
NDUFA3	482	266	0.857607	0	0	0	TRUE	0.551867
BARX1	197	110	0.840692	9.34673e-08	9.91799e-07	4.60951e-07	TRUE	0.558376
OAF	522	294	0.828234	0	0	0	TRUE	0.563218
SFXN3	248	140	0.824913	3.61416e-09	4.84071e-08	2.24978e-08	TRUE	0.564516
RHOB	13302	7522	0.822455	0	0	0	TRUE	0.565479
MRPL21	420	239	0.813379	3.10862e-14	8.71145e-13	4.04876e-13	TRUE	0.569048
GIPC3	235	134	0.810428	1.47999e-08	1.80693e-07	8.39796e-08	TRUE	0.570213
UBC	1020	586	0.799597	0	0	0	TRUE	0.57451
RRP7A	360	207	0.798366	4.29889e-12	8.83151e-11	4.10456e-11	TRUE	0.575
SSBP3	341	197	0.791576	2.14248e-11	4.02063e-10	1.86864e-10	TRUE	0.577713
NDUFS6	1193	699	0.77123	0	0	0	TRUE	0.585918
RPS5	2794	1657	0.753758	0	0	0	TRUE	0.593057
SCAMP4	842	504	0.740396	0	0	0	TRUE	0.598575
RNF181	252	151	0.738875	5.10661e-08	5.69364e-07	2.64619e-07	TRUE	0.599206
ATAD3B	338	203	0.735544	3.2542e-10	5.12752e-09	2.38308e-09	TRUE	0.600592
HOXD11	311	189	0.718528	3.26722e-09	4.41141e-08	2.05026e-08	TRUE	0.607717
CILP2	329	200	0.718088	1.1765e-09	1.6925e-08	7.86613e-09	TRUE	0.607903
APOE	287	175	0.713696	1.56846e-08	1.90796e-07	8.86751e-08	TRUE	0.609756
NKX2-1	262	160	0.711495	7.09927e-08	7.70448e-07	3.58076e-07	TRUE	0.610687
CCDC106	277	171	0.69589	5.24734e-08	5.8272e-07	2.70827e-07	TRUE	0.617329
ATP1B2	340	210	0.695145	1.6934e-09	2.38677e-08	1.10928e-08	TRUE	0.617647
GPR153	346	216	0.679741	2.38853e-09	3.28881e-08	1.52852e-08	TRUE	0.624277
SLC13A4	312	195	0.678072	1.542e-08	1.87852e-07	8.73066e-08	TRUE	0.625
SEMA4B	339	212	0.677221	3.84931e-09	5.1433e-08	2.39042e-08	TRUE	0.625369
TAF10	482	302	0.674485	2.54141e-12	5.3798e-11	2.50033e-11	TRUE	0.626556
TSPAN4	317	200	0.664483	2.02851e-08	2.42001e-07	1.12473e-07	TRUE	0.630915
ATAD3A	564	357	0.659771	1.01141e-13	2.61496e-12	1.21534e-12	TRUE	0.632979
MFSD3	392	250	0.648926	9.3777e-10	1.37151e-08	6.37427e-09	TRUE	0.637755
RNPEPL1	438	280	0.645504	1.18559e-10	1.99013e-09	9.2494e-10	TRUE	0.639269
TRAPPC2L	357	229	0.640576	7.50464e-09	9.51727e-08	4.42328e-08	TRUE	0.641457
ARPC1B	617	396	0.63977	3.19744e-14	8.93038e-13	4.15051e-13	TRUE	0.641815
GHDC	395	254	0.637024	1.43296e-09	2.04384e-08	9.499e-09	TRUE	0.643038
LOC388796	342	220	0.636493	1.8304e-08	2.20255e-07	1.02316e-07	TRUE	0.643275
BCAT2	416	268	0.634351	6.03882e-10	9.13591e-09	4.24603e-09	TRUE	0.644231
PAFAH1B3	491	318	0.626696	2.7667e-11	5.11166e-10	2.37571e-10	TRUE	0.647658
NDUFA11	1743	1130	0.62525	0	0	0	TRUE	0.648308
TEAD4	365	237	0.623009	1.10647e-08	1.36688e-07	6.35277e-08	TRUE	0.649315
DDR1	384	250	0.619178	5.50448e-09	7.12681e-08	3.31228e-08	TRUE	0.651042
SEZ6L2	536	349	0.619006	5.67058e-12	1.14384e-10	5.31615e-11	TRUE	0.651119
KLF16	740	483	0.615502	7.77156e-16	2.57797e-14	1.19222e-14	TRUE	0.652703
PGLS	476	311	0.614047	1.12903e-10	1.90284e-09	8.84369e-10	TRUE	0.653361
CDK2AP2	404	264	0.613817	2.86616e-09	3.91419e-08	1.81917e-08	TRUE	0.653465
WDR85	436	285	0.613366	6.99771e-10	1.0426e-08	4.84563e-09	TRUE	0.65367
HOXB5	422	276	0.612575	1.3613e-09	1.94495e-08	9.03942e-09	TRUE	0.654028
BLVRB	440	288	0.611435	6.46946e-10	9.72573e-09	4.52016e-09	TRUE	0.654545
LRPAP1	1011	662	0.61088	0	0	0	TRUE	0.654797
HMOX1	416	273	0.607683	2.26205e-09	3.12238e-08	1.45117e-08	TRUE	0.65625
CTXN1	609	400	0.606442	5.17031e-13	1.22315e-11	5.68476e-12	TRUE	0.656814
JUN	11397	7499	0.603884	0	0	0	TRUE	0.65798
ADAMTS1	5242	3455	0.601432	0	0	0	TRUE	0.6591
MYADM	512	338	0.599121	5.53161e-11	9.75596e-10	4.53421e-10	TRUE	0.660156
NME3	375	248	0.59655	2.2564e-08	2.66712e-07	1.23958e-07	TRUE	0.661333
TM7SF2	348	231	0.591194	8.95264e-08	9.52401e-07	4.42641e-07	TRUE	0.663793
C19orf63	1547	1027	0.591037	0	0	0	TRUE	0.663866
HES4	471	313	0.589564	5.42049e-10	8.26785e-09	3.84259e-09	TRUE	0.664544
LIMD2	441	294	0.584963	2.41001e-09	3.31565e-08	1.54099e-08	TRUE	0.666667
TSPO	486	324	0.584963	3.74e-10	5.84335e-09	2.71577e-09	TRUE	0.666667
FOXD1	398	267	0.575929	2.16989e-08	2.57032e-07	1.19459e-07	TRUE	0.670854
SF3B5	1851	1242	0.57564	0	0	0	TRUE	0.670989
C20orf112	572	384	0.574909	2.0666e-11	3.88261e-10	1.80449e-10	TRUE	0.671329
TCF3	1509	1014	0.573535	0	0	0	TRUE	0.671968
LSM7	447	301	0.570511	3.92978e-09	5.23407e-08	2.4326e-08	TRUE	0.673378
SLC2A4RG	541	365	0.567732	1.1113e-10	1.87864e-09	8.73123e-10	TRUE	0.674677
KRTCAP2	489	330	0.567368	8.79189e-10	1.29262e-08	6.00764e-09	TRUE	0.674847
CXCR4	564	381	0.565904	5.05015e-11	8.96361e-10	4.16596e-10	TRUE	0.675532
ZNHIT1	772	523	0.56179	2.16493e-14	6.1757e-13	2.86779e-13	TRUE	0.677461
DUSP1	400	271	0.561707	3.81683e-08	4.3337e-07	2.01414e-07	TRUE	0.6775
COL2A1	637	432	0.560262	4.35751e-12	8.94093e-11	4.15542e-11	TRUE	0.678179
TMEM205	483	328	0.558327	1.81862e-09	2.5482e-08	1.18429e-08	TRUE	0.679089
ATP5O	1157	789	0.552292	0	0	0	TRUE	0.681936
LOC100128731	1610	1099	0.550869	0	0	0	TRUE	0.682609
MSI1	525	359	0.548334	6.49606e-10	9.75694e-09	4.53467e-09	TRUE	0.68381
C7orf68	1204	824	0.547119	0	0	0	TRUE	0.684385
AGPAT2	577	395	0.546719	1.03928e-10	1.76942e-09	8.22362e-10	TRUE	0.684575
VANGL2	707	484	0.546703	8.55982e-13	1.95844e-11	9.10211e-12	TRUE	0.684583
CLPP	772	529	0.545333	8.77076e-14	2.28176e-12	1.06048e-12	TRUE	0.685233
SERF2	2173	1491	0.543408	0	0	0	TRUE	0.686148
SEPW1	434	298	0.542383	2.58522e-08	3.01525e-07	1.40138e-07	TRUE	0.686636
IGFBP2	837	575	0.541666	1.13243e-14	3.31821e-13	1.54218e-13	TRUE	0.686977
IFITM2	419	288	0.540881	4.81351e-08	5.39566e-07	2.5077e-07	TRUE	0.687351
GPSM1	541	372	0.540326	5.76216e-10	8.74111e-09	4.06255e-09	TRUE	0.687616
ZNF259	547	377	0.536976	5.6586e-10	8.59963e-09	3.99679e-09	TRUE	0.689214
SELM	650	449	0.533724	1.75701e-11	3.33472e-10	1.54985e-10	TRUE	0.690769
C16orf13	492	340	0.533124	5.05327e-09	6.62999e-08	3.08137e-08	TRUE	0.691057
HOXA3	606	420	0.528928	1.14958e-10	1.93162e-09	8.97744e-10	TRUE	0.693069
C7orf50	895	621	0.527294	5.55112e-15	1.68266e-13	7.8204e-14	TRUE	0.693855
S100A13	530	368	0.526287	1.92955e-09	2.67669e-08	1.24403e-08	TRUE	0.69434
NDUFA13	1700	1181	0.525526	0	0	0	TRUE	0.694706
COX8A	3453	2399	0.525417	0	0	0	TRUE	0.694758
MDK	3093	2152	0.523329	0	0	0	TRUE	0.695765
HSPB1	984	685	0.522554	4.44089e-16	1.51371e-14	7.00657e-15	TRUE	0.696138
RPLP2	2154	1503	0.519173	0	0	0	TRUE	0.697772
ALDOA	13110	9150	0.518824	0	0	0	TRUE	0.697941
ANXA11	753	526	0.517587	1.66811e-12	3.68042e-11	1.71052e-11	TRUE	0.698539
HAUS7	687	480	0.517276	1.58427e-11	3.02751e-10	1.40707e-10	TRUE	0.69869
ETFB	747	522	0.517058	2.12963e-12	4.60143e-11	2.13858e-11	TRUE	0.698795
MAPK12	502	352	0.512112	1.09934e-08	1.35909e-07	6.31653e-08	TRUE	0.701195
LGALS3BP	529	371	0.511849	4.52234e-09	5.97564e-08	2.77726e-08	TRUE	0.701323
MFSD10	449	315	0.511364	6.73351e-08	7.33136e-07	3.40735e-07	TRUE	0.701559
CD151	821	576	0.511313	2.90101e-13	7.11494e-12	3.30676e-12	TRUE	0.701583
NDUFA2	876	615	0.510344	5.16254e-14	1.38848e-12	6.45315e-13	TRUE	0.702055
PTRH2	514	361	0.50977	8.36008e-09	1.05302e-07	4.89404e-08	TRUE	0.702335
CSTB	1590	1117	0.509398	0	0	0	TRUE	0.702516
BMP7	740	520	0.509014	5.05018e-12	1.02738e-10	4.7749e-11	TRUE	0.702703
CHPF	650	457	0.508246	1.02806e-10	1.75389e-09	8.15143e-10	TRUE	0.703077
C12orf10	485	341	0.508213	2.37413e-08	2.79244e-07	1.29782e-07	TRUE	0.703093
RPL29	519	365	0.507838	7.87324e-09	9.96204e-08	4.62999e-08	TRUE	0.703276
B3GALT6	607	427	0.50746	4.44625e-10	6.86334e-09	3.18983e-09	TRUE	0.70346
AES	2006	1418	0.500464	0	0	0	TRUE	0.706879
FBXO46	495	350	0.500074	2.60671e-08	3.0382e-07	1.41204e-07	TRUE	0.707071

## Sheet: TG AS Gene Ontology
ENSG	Sublist	Category	Term	%	P-Value	Benjamini			Cell Cycle Candidate Genes
ENSG00000175455		GOTERM_BP_FAT	cell cycle	9.4	7.1e-09	1.4e-05			CTR10
ENSG00000134058		GOTERM_BP_FAT	cell cycle process	7.3	8.2e-08	8.2e-05			ADD3
ENSG00000136643		GOTERM_BP_FAT	cell cycle phase	5.3	6.1e-06	0.004			ANAPC11
ENSG00000166451		GOTERM_BP_FAT	RNA processing	6.3	1e-05	0.005			ANLN
ENSG00000067113		GOTERM_BP_FAT	M phase	4.5	1.1e-05	0.0045			APP
ENSG00000124120		GOTERM_BP_FAT	RNA splicing	4	2.1e-05	0.0071			BAX
ENSG00000165533		GOTERM_BP_FAT	mRNA metabolic process	4.7	3.4e-05	0.0097			C11orf82
ENSG00000149131		GOTERM_BP_FAT	chromatin modification	3.9	3.5e-05	0.0087			C14orf166
ENSG00000179818		GOTERM_BP_FAT	RNA splicing, via transesterification reactions with bulged adenosine as nucleophile	2.7	4.2e-05	0.0092			CCNE1
ENSG00000182986		GOTERM_BP_FAT	RNA splicing, via transesterification reactions	2.7	4.2e-05	0.0092			CDC14B
ENSG00000136153		GOTERM_BP_FAT	nuclear mRNA splicing, via spliceosome	2.7	4.2e-05	0.0092			CDC25C
ENSG00000107263		GOTERM_BP_FAT	mRNA processing	4.2	5.7e-05	0.011			CDK1
ENSG00000186522		GOTERM_BP_FAT	DNA metabolic process	5.5	0.00013	0.024			CDK11A
ENSG00000132881		GOTERM_BP_FAT	mitotic cell cycle	4.4	0.00022	0.035			CDK2
ENSG00000256591		GOTERM_BP_FAT	response to DNA damage stimulus	4.4	0.00025	0.037			CDK5RAP2
ENSG00000198707		GOTERM_BP_FAT	cell division	3.7	0.00029	0.04			CDK7
ENSG00000101166		GOTERM_BP_FAT	organelle fission	3.1	0.00055	0.07			CENPE
ENSG00000134762		GOTERM_BP_FAT	regulation of cell cycle	3.9	0.00057	0.069			CENPK
ENSG00000018189		GOTERM_BP_FAT	translation	3.9	0.00057	0.069			CENPN
ENSG00000135525		GOTERM_BP_FAT	posttranscriptional regulation of gene expression	2.9	0.00058	0.066			CENPV
ENSG00000011523		GOTERM_BP_FAT	nuclear division	2.9	0.00093	0.098			CEP120
ENSG00000122299		GOTERM_BP_FAT	mitosis	2.9	0.00093	0.098			CEP290
ENSG00000168385									CEP68
ENSG00000130935									CEP70
ENSG00000114491									CHD1L
ENSG00000104529									CHEK2
ENSG00000095794									CHTF18
ENSG00000162614									CLASP1
ENSG00000108474									CROCC
ENSG00000100802									CSNK1D
ENSG00000138777									DGKZ
ENSG00000131725									DNM1
ENSG00000105750									E2F5
ENSG00000158163									EIF2B5
ENSG00000134138									EIF4G2
ENSG00000070010									EXO1
ENSG00000163138									FAM82B
ENSG00000144802									FANCA
ENSG00000196652									FLII
ENSG00000231607									GAS8
ENSG00000238105									GOLGA2B
ENSG00000131797									GTF2H2
ENSG00000150433									H2AFY
ENSG00000246273									HDAC3
ENSG00000237651									ILF3
ENSG00000075413									INCENP
ENSG00000177679									ING4
ENSG00000113658									INVS
ENSG00000180198									ITGB1
ENSG00000164172									ITGB3BP
ENSG00000253882									KATNA1
ENSG00000154040									KLC1
ENSG00000244754									MAP7
ENSG00000152904									MAPK7
ENSG00000124006									MDM2
ENSG00000124067									MLF1
ENSG00000112367									MLL5
ENSG00000049883									MORF4L2
ENSG00000154479									NAE1
ENSG00000220804									NOL8
ENSG00000014914									NUF2
ENSG00000002016									OS9
ENSG00000114107									PARD3
ENSG00000134758									PGAP2
ENSG00000138399									PKMYT1
ENSG00000234899									PLAGL1
ENSG00000135679									PLK1S1
ENSG00000152620									PPFIBP1
ENSG00000125388									PPP2R5C
ENSG00000125954									PRKDC
ENSG00000148700									PRMT7
ENSG00000136536									PSMA1
ENSG00000136068									PSMC3IP
ENSG00000040341									PSMC5
ENSG00000146872									PSMD13
ENSG00000137145									PSMD2
ENSG00000113300									PTGES3
ENSG00000164253									RAD1
ENSG00000138674									RAD51AP1
ENSG00000147050									RAD52
ENSG00000183597									RBBP4
ENSG00000113456									RCC1
ENSG00000100372									RECQL
ENSG00000136122									REPIN1
ENSG00000168591									RFC2
ENSG00000154727									SEPT10
ENSG00000170379									SEPT2
ENSG00000181315									SEPT6
ENSG00000150593									SEPT7P2
ENSG00000144199									SETMAR
ENSG00000151366									SMC6
ENSG00000148634									SMEK2
ENSG00000174371									SREBF1
ENSG00000111596									STAU2
ENSG00000264538									TARDBP
ENSG00000169762									TBL1XR1
ENSG00000123636									TDP1
ENSG00000134504									THAP6
ENSG00000122335									TINF2
ENSG00000159023									TLK2
ENSG00000206149									TTC8
ENSG00000116285									UBC
ENSG00000074054									UHRF2
ENSG00000139546									WDR44
ENSG00000198000									WDR6
ENSG00000011638									XRCC6
ENSG00000225484									ZMAT3
ENSG00000154978									ZNF655
ENSG00000161010
ENSG00000132394
ENSG00000134759
ENSG00000135655
ENSG00000164073
ENSG00000092330
ENSG00000166181
ENSG00000196419
ENSG00000060762
ENSG00000140157
ENSG00000185480
ENSG00000251022
ENSG00000196456
ENSG00000008838
ENSG00000205571
ENSG00000141101
ENSG00000028310
ENSG00000165304
ENSG00000081377
ENSG00000133794
ENSG00000225241
ENSG00000091409
ENSG00000122779
ENSG00000204371
ENSG00000168137
ENSG00000204536
ENSG00000249624
ENSG00000221838
ENSG00000039319
ENSG00000115514
ENSG00000134262
ENSG00000117625
ENSG00000141569
ENSG00000178252
ENSG00000127586
ENSG00000176945
ENSG00000105793
ENSG00000178053
ENSG00000110497
ENSG00000242612
ENSG00000233184
ENSG00000024526
ENSG00000263070
ENSG00000131966
ENSG00000167264
ENSG00000136715
ENSG00000057935
ENSG00000013441
ENSG00000162521
ENSG00000204152
ENSG00000086232
ENSG00000148399
ENSG00000100744
ENSG00000138778
ENSG00000182149
ENSG00000100109
ENSG00000085274
ENSG00000151883
ENSG00000148498
ENSG00000072134
ENSG00000100084
ENSG00000174384
ENSG00000078304
ENSG00000105173
ENSG00000005483
ENSG00000225210
ENSG00000173209
ENSG00000042088
ENSG00000100889
ENSG00000072310
ENSG00000187984
ENSG00000197965
ENSG00000111142
ENSG00000144785
ENSG00000149187
ENSG00000145147
ENSG00000104368
ENSG00000159593
ENSG00000169045
ENSG00000197343
ENSG00000157985
ENSG00000090621
ENSG00000170364
ENSG00000163946
ENSG00000196912
ENSG00000135506
ENSG00000145425
ENSG00000100938
ENSG00000147854
ENSG00000186866
ENSG00000119596
ENSG00000121073
ENSG00000157593
ENSG00000148187
ENSG00000258780
ENSG00000143228
ENSG00000115325
ENSG00000244005
ENSG00000160310
ENSG00000153037
ENSG00000188243
ENSG00000127314
ENSG00000172661
ENSG00000102317
ENSG00000172053
ENSG00000084207
ENSG00000170312
ENSG00000126768
ENSG00000120948
ENSG00000143393
ENSG00000128595
ENSG00000104177
ENSG00000065548
ENSG00000173230
ENSG00000171720
ENSG00000143401
ENSG00000160439
ENSG00000157306
ENSG00000214022
ENSG00000172239
ENSG00000125458
ENSG00000104408
ENSG00000163029
ENSG00000112983
ENSG00000151353
ENSG00000155984
ENSG00000072571
ENSG00000138757
ENSG00000108312
ENSG00000169371
ENSG00000008130
ENSG00000130921
ENSG00000140988
ENSG00000242114
ENSG00000131446
ENSG00000141542
ENSG00000101365
ENSG00000170791
ENSG00000171603
ENSG00000063046
ENSG00000123562
ENSG00000178802
ENSG00000150093
ENSG00000123159
ENSG00000118495
ENSG00000087302
ENSG00000182199
ENSG00000147403
ENSG00000167978
ENSG00000183765
ENSG00000264772
ENSG00000109971
ENSG00000131778
ENSG00000244687
ENSG00000119487
ENSG00000134419
ENSG00000160200
ENSG00000110958
ENSG00000230798
ENSG00000115486
ENSG00000164548
ENSG00000174915
ENSG00000063241
ENSG00000167863
ENSG00000183506
ENSG00000153914
ENSG00000175166
ENSG00000104885
ENSG00000196924
ENSG00000065911
ENSG00000108848
ENSG00000112167
ENSG00000136932
ENSG00000116754
ENSG00000154305
ENSG00000162813
ENSG00000173801
ENSG00000214765
ENSG00000138668
ENSG00000149925
ENSG00000169592
ENSG00000205581
ENSG00000106603
ENSG00000125863
ENSG00000156599
ENSG00000117500
ENSG00000132600
ENSG00000149658
ENSG00000160194
ENSG00000168958
ENSG00000162735
ENSG00000089157
ENSG00000101220
ENSG00000010244
ENSG00000143774
ENSG00000169241
ENSG00000152795
ENSG00000131876
ENSG00000178035
ENSG00000172062
ENSG00000165525
ENSG00000120306
ENSG00000154380
ENSG00000141552
ENSG00000136240
ENSG00000127952
ENSG00000149503
ENSG00000070371
ENSG00000128463
ENSG00000049541
ENSG00000177830
ENSG00000089597
ENSG00000169246
ENSG00000126457
ENSG00000156411
ENSG00000198064
ENSG00000155366
ENSG00000176261
ENSG00000214413
ENSG00000243716
ENSG00000142192
ENSG00000071994
ENSG00000057608
ENSG00000165501
ENSG00000136861
ENSG00000011426
ENSG00000109180
ENSG00000022267
ENSG00000113240
ENSG00000168803
ENSG00000221926
ENSG00000063601
ENSG00000123219
ENSG00000258466
ENSG00000112282
ENSG00000125871
ENSG00000167695
ENSG00000137575
ENSG00000136699
ENSG00000133612
ENSG00000184863
ENSG00000093144
ENSG00000112812
ENSG00000139436
ENSG00000260083
ENSG00000157954
ENSG00000111846
ENSG00000132541
ENSG00000224450
ENSG00000172785
ENSG00000086666
ENSG00000182718
ENSG00000113648
ENSG00000075292
ENSG00000164111
ENSG00000181264
ENSG00000182165
ENSG00000132591
ENSG00000253729
ENSG00000215067
ENSG00000198752
ENSG00000143207
ENSG00000158062
ENSG00000058272
ENSG00000087191
ENSG00000232559
ENSG00000186106
ENSG00000154553
ENSG00000186625
ENSG00000185499
ENSG00000164830
ENSG00000145736
ENSG00000165490
ENSG00000186314
ENSG00000175575
ENSG00000069424
ENSG00000110841
ENSG00000004700
ENSG00000078618
ENSG00000102032
ENSG00000153310
ENSG00000102908
ENSG00000260128
ENSG00000117620
ENSG00000129534
ENSG00000106346
ENSG00000145348
ENSG00000104447
ENSG00000135740
ENSG00000188234
ENSG00000173531
ENSG00000068745
ENSG00000225697
ENSG00000160712
ENSG00000090612
ENSG00000172954
ENSG00000139178
ENSG00000204120
ENSG00000085117
ENSG00000142856
ENSG00000125354
ENSG00000114346
ENSG00000213762
ENSG00000175449
ENSG00000245937
ENSG00000177565
ENSG00000105339
ENSG00000165028
ENSG00000185379
ENSG00000090054
ENSG00000129455
ENSG00000138658
ENSG00000137876
ENSG00000136682
ENSG00000241852
ENSG00000007384
ENSG00000167733
ENSG00000103034
ENSG00000135596
ENSG00000167778
ENSG00000172932
ENSG00000130714
ENSG00000058453
ENSG00000177731
ENSG00000162004
ENSG00000162191
ENSG00000213930
ENSG00000124357
ENSG00000143499
ENSG00000198830
ENSG00000151092
ENSG00000058673
ENSG00000100395
ENSG00000100462
ENSG00000127054
ENSG00000069493
ENSG00000127980
ENSG00000178605
ENSG00000141279
ENSG00000007372
ENSG00000152076
ENSG00000119760
ENSG00000159140
ENSG00000165792
ENSG00000185122
ENSG00000182944
ENSG00000110888
ENSG00000197948
ENSG00000185627
ENSG00000241973
ENSG00000197114
ENSG00000165359
ENSG00000255717
ENSG00000154545
ENSG00000149100
ENSG00000106591
ENSG00000174093
ENSG00000119509
ENSG00000110330
ENSG00000166484
ENSG00000187243
ENSG00000141002
ENSG00000162772
ENSG00000003509
ENSG00000119723
ENSG00000099949
ENSG00000123737
ENSG00000117335
ENSG00000089737
ENSG00000234741
ENSG00000221978
ENSG00000132424
ENSG00000060138
ENSG00000134884
ENSG00000166165
ENSG00000110321
ENSG00000161939
ENSG00000111642
ENSG00000141456
ENSG00000166582
ENSG00000168002
ENSG00000213619
ENSG00000160948
ENSG00000142541
ENSG00000130713
ENSG00000049656
ENSG00000160789
ENSG00000105135
ENSG00000143224
ENSG00000143416
ENSG00000159459
ENSG00000088387
ENSG00000197555
ENSG00000169660
ENSG00000188283
ENSG00000115806
ENSG00000155561
ENSG00000132793
ENSG00000174796
ENSG00000238261
ENSG00000138614
ENSG00000089060
ENSG00000088970
ENSG00000043093
ENSG00000116747
ENSG00000164970
ENSG00000164211
ENSG00000126214
ENSG00000168890
ENSG00000169609
ENSG00000111247
ENSG00000111325
ENSG00000119688
ENSG00000140265
ENSG00000078668
ENSG00000172671
ENSG00000144589
ENSG00000068137
ENSG00000137563
ENSG00000127184
ENSG00000070882
ENSG00000121022
ENSG00000182196
ENSG00000167280
ENSG00000165494
ENSG00000119866
ENSG00000158773
ENSG00000074266
ENSG00000197381
ENSG00000198860
ENSG00000126456
ENSG00000137955
ENSG00000171204
ENSG00000187147
ENSG00000198736
ENSG00000170689
ENSG00000104852
ENSG00000105854
ENSG00000169738
ENSG00000073060
ENSG00000129084
ENSG00000186205
ENSG00000123374
ENSG00000150991
ENSG00000100445
ENSG00000182093
ENSG00000100991
ENSG00000141551
ENSG00000164683
ENSG00000096696
ENSG00000089280
ENSG00000105258
ENSG00000203875
ENSG00000204387
ENSG00000122786
ENSG00000143156
ENSG00000008128
ENSG00000125870
ENSG00000131470
ENSG00000085733
ENSG00000148985
ENSG00000122783
ENSG00000151743
ENSG00000108296
ENSG00000180228
ENSG00000167904
ENSG00000163608
ENSG00000206503
ENSG00000230487
ENSG00000198853
ENSG00000152990
ENSG00000187741
ENSG00000104164
ENSG00000014123
ENSG00000158402
ENSG00000116830
ENSG00000215472
ENSG00000113108
ENSG00000144642
ENSG00000080822
ENSG00000010539
ENSG00000141013
ENSG00000244306
ENSG00000203836
ENSG00000168487
ENSG00000204147
ENSG00000152042
ENSG00000178381
ENSG00000239382
ENSG00000154889
ENSG00000183762
ENSG00000111653
ENSG00000116750
ENSG00000100097
ENSG00000077254
ENSG00000171634
ENSG00000127564
ENSG00000139624
ENSG00000087088
ENSG00000103145
ENSG00000174720
ENSG00000144711
ENSG00000133740
ENSG00000089006
ENSG00000131748
ENSG00000261740
ENSG00000196998
ENSG00000204628
ENSG00000185630
ENSG00000143971
ENSG00000110075
ENSG00000165119
ENSG00000162613
ENSG00000229807
ENSG00000119787
ENSG00000106976
ENSG00000176623
ENSG00000102858
ENSG00000129351
ENSG00000157916
ENSG00000237289
ENSG00000142864
ENSG00000007392
ENSG00000138041
ENSG00000162923
ENSG00000163444
ENSG00000128699
ENSG00000166441
ENSG00000149091
ENSG00000135119
ENSG00000094914
ENSG00000068120
ENSG00000167792
ENSG00000175470
ENSG00000101752
ENSG00000123473
ENSG00000215252
ENSG00000198589
ENSG00000160298
ENSG00000134575
ENSG00000006042
ENSG00000166783
ENSG00000183305
ENSG00000142530
ENSG00000092020
ENSG00000134744
ENSG00000166471
ENSG00000168944
ENSG00000079974
ENSG00000090661
ENSG00000134815
ENSG00000076864
ENSG00000079102
ENSG00000172667
ENSG00000133460
ENSG00000072682
ENSG00000206195
