# Supplementary material for: An extensive program of periodic alternative splicing linked to cell cycle progression
Source: eLife. 2016 Mar 25;5:e10288. doi: 10.7554/eLife.10288 (PMC4884079; doi:10.7554/eLife.10288)
Supplement: Supplementary file 3. — Data associated with Figure 3. DOI: http://dx.doi.org/10.7554/eLife.10288.020 [file elife-10288-supp3.xlsx]

## Sheet: legend
LEGEND
a nd b denotes biological duplicates
G1 is t=0 after double thymidine block
T6 is t=6 (G2 phase, 6hrs after double thymidine)
Tg is treatment with TG003 after release from G1 and collected at T6
Kh is treatment with KHCB19 after release from G1 and collected at T6
vs denotes comparisons (i.e. G1 vs T6 compares G1 and T6)
PSI refers to percent-spliced-in
abs PSI refers to absoloute PSI
Significantly blocked refers to changes that were significant between G1 and T6 but insignificant after drug treatment
hit? Refers to significant changes which meet a p-value of >.05 and a abs delta PSI of .05

## Sheet: TG and KH treatments
	Gene_ID	Gene_Symbol	event_name	PSI G1a	PSI G1b	PSI T6a	PSI T6b	PSI Tga	PSI TGb	PSI Kha	PSI KHb	p-value G1 vs T6	p-value G1vs TG	p-value G1 vs KH	p-value T6 vs TG	p-value T6 vs KH	avg PSI G1	avg PSI T6	avg PSI Tg	avg PSI Kh	delta G1 vs T6	delta G1 vs Tg	delta G1 vs Kh	delta T6 vs Tg	delta T6 vs Kh	abs deltaPSI G1 T6	abs deltaPSi G1 TG	abs deltaPSi G1 KH	abs deltaPSi T6 TG	abs deltaPSi T6 KH	hit?dG1 T6	hit?dG1 vs TG	hit?dG1 vs KH	hit?dT6 vs TG	hit?dT6 vs KH	Not Sig (TG or KH v G1 )	Sig (TG or KH vs T=6)	Not sig( TG and KH v G1)	Specifically Blocked TG or KH	Specifically blocked by TG and KH	Blocked and Sig at TG or KH v T6	Specifically blocked by TG	Specifically blocked by KH
SE	ENSG00000132854	KANK4	chr1:62747221:62747306:-@chr1:62738876:62740759:-@chr1:62737150:62737261:-	0.62	0.65	0.69	0.71	0.82	0.67	0.65	0.66	0.0368357	0.179494	0.145815	0.320635	0.0545126	0.6356	0.7035	0.7505	0.6625	-0.0679	-0.1149	-0.0269	-0.047	0.041	0.0679	0.1149	0.0269	0.047	0.041	TRUE	FALSE	FALSE	FALSE	FALSE	TRUE	FALSE	TRUE	TRUE	TRUE	TRUE	TRUE	TRUE
SE	ENSG00000134369	NAV1	chr1:201755557:201755705:+@chr1:201757596:201757766:+@chr1:201758868:201758920:+	0.67	0.71	0.46	0.52	0.67	0.45	0.81	0.46	0.0225152	0.226905	0.414464	0.314344	0.274081	0.6906	0.4935	0.5655	0.6425	0.1971	0.1251	0.0481	-0.072	-0.149	0.1971	0.1251	0.0481	0.072	0.149	TRUE	FALSE	FALSE	FALSE	FALSE	TRUE	FALSE	TRUE	TRUE	TRUE	TRUE	TRUE	TRUE
SE	ENSG00000075151	EIF4G3	chr1:21329206:21329301:-@chr1:21324094:21324126:-@chr1:21307541:21307720:-	0.1	0.1	0.04	0.05	0.08	0.1	0.1	0.06	0.032844	0.356072	0.311698	0.0450144	0.138904	0.1006	0.0485	0.0955	0.0875	0.0521	0.0051	0.0131	-0.047	-0.039	0.0521	0.0051	0.0131	0.047	0.039	TRUE	FALSE	FALSE	FALSE	FALSE	TRUE	FALSE	TRUE	TRUE	TRUE	TRUE	TRUE	TRUE
SE	ENSG00000116977	LGALS8	chr1:236681724:236681800:+@chr1:236687270:236687361:+@chr1:236689268:236689415:+	0.7	0.65	0.58	0.55	0.66	0.75	0.65	0.73	0.0469177	0.293961	0.34958	0.0858716	0.0814077	0.6756	0.5685	0.7105	0.6975	0.1071	-0.0349	-0.0219	-0.142	-0.129	0.1071	0.0349	0.0219	0.142	0.129	TRUE	FALSE	FALSE	FALSE	FALSE	TRUE	FALSE	TRUE	TRUE	TRUE	TRUE	TRUE	TRUE
SE	ENSG00000227232	WASH7P	chr1:24738:24891:-@chr1:18268:18369:-@chr1:17915:18061:-	0.56	0.63	0.77	0.74	0.62	0.7	0.53	0.45	0.0476123	0.161252	0.10244	0.116959	0.0335709	0.5956	0.7585	0.6655	0.4975	-0.1629	-0.0699	0.0981	0.093	0.261	0.1629	0.0699	0.0981	0.093	0.261	TRUE	FALSE	FALSE	FALSE	TRUE	TRUE	TRUE	TRUE	TRUE	TRUE	TRUE	TRUE	TRUE
SE	NA	NA	chr1:100617941:100618080:-@chr1:100614922:100614991:-@chr1:100614004:100614653:-	0.06	0.07	0.13	0.11	0.13	0.07	0.09	0.09	0.0307094	0.200646	0.0439994	0.325552	0.111095	0.0656	0.1235	0.1055	0.0975	-0.0579	-0.0399	-0.0319	0.018	0.026	0.0579	0.0399	0.0319	0.018	0.026	TRUE	FALSE	FALSE	FALSE	FALSE	TRUE	FALSE	TRUE	TRUE	TRUE	TRUE	TRUE	TRUE
SE	ENSG00000154380	ENAH	chr1:225695653:225695719:-@chr1:225688694:225688772:-@chr1:225686049:225686106:-	0.39	0.41	0.52	0.48	0.55	0.45	0.55	0.55	0.0371066	0.135663	0.0192051	0.487467	0.110208	0.4006	0.5035	0.5055	0.5575	-0.1029	-0.1049	-0.1569	-0.002	-0.054	0.1029	0.1049	0.1569	0.002	0.054	TRUE	FALSE	TRUE	FALSE	FALSE	TRUE	FALSE	FALSE	TRUE	FALSE	TRUE	TRUE	FALSE
SE	ENSG00000242349	NPPA-AS1	chr1:11901112:11901264:+@chr1:11903761:11904130:+@chr1:11905604:11905823:+	0.68	0.7	0.55	0.52	0.69	0.62	0.52	0.4	0.00973659	0.269645	0.0791069	0.0681696	0.218435	0.6906	0.5385	0.6605	0.4675	0.1521	0.0301	0.2231	-0.122	0.071	0.1521	0.0301	0.2231	0.122	0.071	TRUE	FALSE	FALSE	FALSE	FALSE	TRUE	FALSE	TRUE	TRUE	TRUE	TRUE	TRUE	TRUE
SE	ENSG00000176393	RNPEP	chr1:201965275:201965391:+@chr1:201966447:201966682:+@chr1:201969030:201969143:+	0.97	0.95	0.91	0.88	0.93	0.96	0.96	0.92	0.0422246	0.32468	0.314543	0.0672433	0.0958696	0.9606	0.8985	0.9505	0.9475	0.0621	0.0101	0.0131	-0.052	-0.049	0.0621	0.0101	0.0131	0.052	0.049	TRUE	FALSE	FALSE	FALSE	FALSE	TRUE	FALSE	TRUE	TRUE	TRUE	TRUE	TRUE	TRUE
SE	ENSG00000127483	HP1BP3	chr1:21112679:21113124:-@chr1:21106848:21107033:-@chr1:21106305:21106404:-	0.94	0.92	0.84	0.87	0.93	0.81	0.93	0.9	0.0375839	0.261024	0.349178	0.411977	0.0475702	0.9306	0.8585	0.8755	0.9225	0.0721	0.0551	0.0081	-0.017	-0.064	0.0721	0.0551	0.0081	0.017	0.064	TRUE	FALSE	FALSE	FALSE	TRUE	TRUE	TRUE	TRUE	TRUE	TRUE	TRUE	TRUE	TRUE
SE	ENSG00000162384	C1orf123	chr1:53685933:53686016:-@chr1:53684539:53684595:-@chr1:53684086:53684167:-	0.47	0.52	0.61	0.63	0.48	0.67	0.63	0.66	0.0414652	0.266746	0.0233289	0.365347	0.138859	0.4956	0.6235	0.5805	0.6525	-0.1279	-0.0849	-0.1569	0.043	-0.029	0.1279	0.0849	0.1569	0.043	0.029	TRUE	FALSE	TRUE	FALSE	FALSE	TRUE	FALSE	FALSE	TRUE	FALSE	TRUE	TRUE	FALSE
SE	ENSG00000142920	ADC	chr1:33546989:33547109:+@chr1:33549555:33549728:+@chr1:33557651:33557823:+	0.62	0.66	0.45	0.48	0.54	0.51	0.66	0.47	0.0116805	0.0265512	0.300539	0.0502263	0.233217	0.6406	0.4685	0.5305	0.5725	0.1721	0.1101	0.0681	-0.062	-0.104	0.1721	0.1101	0.0681	0.062	0.104	TRUE	TRUE	FALSE	FALSE	FALSE	TRUE	FALSE	FALSE	TRUE	FALSE	TRUE	FALSE	TRUE
SE	ENSG00000059588	TARBP1	chr1:234529392:234529583:-@chr1:234529108:234529222:-@chr1:234528162:234528298:-	0.32	0.28	0.41	0.39	0.25	0.27	0.22	0.13	0.0409199	0.152047	0.0942497	0.00535299	0.0569651	0.3006	0.4035	0.2655	0.1825	-0.1029	0.0351	0.1181	0.138	0.221	0.1029	0.0351	0.1181	0.138	0.221	TRUE	FALSE	FALSE	TRUE	FALSE	TRUE	TRUE	TRUE	TRUE	TRUE	TRUE	TRUE	TRUE
SE	ENSG00000143224	PPOX	chr1:161136890:161137024:+@chr1:161140199:161140309:+@chr1:161140410:161140559:+	0.75	0.8	0.58	0.58	0.63	0.6	0.33	0.52	0.0404871	0.0249918	0.0773281	0.118714	0.179504	0.7756	0.5835	0.6205	0.4325	0.1921	0.1551	0.3431	-0.037	0.151	0.1921	0.1551	0.3431	0.037	0.151	TRUE	TRUE	FALSE	FALSE	FALSE	TRUE	FALSE	FALSE	TRUE	FALSE	TRUE	FALSE	TRUE
SE	ENSG00000008130	NADK	chr1:1688620:1688749:-@chr1:1688218:1688321:-@chr1:1687942:1688047:-	0.03	0.03	0.19	0.18	0.11	0.12	0.15	0.21	0.00863456	0.0189724	0.0610887	0.00607812	0.489595	0.0306	0.1885	0.1205	0.1875	-0.1579	-0.0899	-0.1569	0.068	0.001	0.1579	0.0899	0.1569	0.068	0.001	TRUE	TRUE	FALSE	TRUE	FALSE	TRUE	TRUE	FALSE	TRUE	FALSE	TRUE	FALSE	TRUE
SE	ENSG00000197530	MIB2	chr1:1560666:1560808:+@chr1:1560938:1561033:+@chr1:1562030:1562134:+	0.26	0.32	0.61	0.61	0.28	0.45	0.39	0.24	0.0290655	0.257732	0.372939	0.107687	0.0797712	0.2906	0.6135	0.3705	0.3225	-0.3229	-0.0799	-0.0319	0.243	0.291	0.3229	0.0799	0.0319	0.243	0.291	TRUE	FALSE	FALSE	FALSE	FALSE	TRUE	FALSE	TRUE	TRUE	TRUE	TRUE	TRUE	TRUE
SE	ENSG00000143630	HCN3	chr1:155252202:155252631:+@chr1:155253765:155253926:+@chr1:155254330:155254548:+	0.57	0.66	0.33	0.28	0.48	0.36	0.21	0.43	0.0231629	0.0672984	0.0992446	0.134924	0.446102	0.6156	0.3085	0.4255	0.3275	0.3071	0.1901	0.2881	-0.117	-0.019	0.3071	0.1901	0.2881	0.117	0.019	TRUE	FALSE	FALSE	FALSE	FALSE	TRUE	FALSE	TRUE	TRUE	TRUE	TRUE	TRUE	TRUE
SE	ENSG00000203965	EFCAB7	chr1:64017396:64017505:+@chr1:64021029:64021186:+@chr1:64022785:64022918:+	0.82	0.82	0.72	0.7	0.57	0.72	0.67	0.65	0.0279636	0.132965	0.0195633	0.278148	0.0378693	0.8206	0.7135	0.6505	0.6675	0.1071	0.1701	0.1531	0.063	0.046	0.1071	0.1701	0.1531	0.063	0.046	TRUE	FALSE	TRUE	FALSE	FALSE	TRUE	FALSE	FALSE	TRUE	FALSE	TRUE	TRUE	FALSE
SE	ENSG00000131778	CHD1L	chr1:146714291:146714480:+@chr1:146731491:146731572:+@chr1:146737591:146737746:+	0.37	0.42	0.23	0.15	0.38	0.26	0.5	0.18	0.0334199	0.217406	0.406923	0.112241	0.253272	0.3956	0.1935	0.3255	0.3475	0.2021	0.0701	0.0481	-0.132	-0.154	0.2021	0.0701	0.0481	0.132	0.154	TRUE	FALSE	FALSE	FALSE	FALSE	TRUE	FALSE	TRUE	TRUE	TRUE	TRUE	TRUE	TRUE
SE	NA	NA	chr1:110881945:110884890:+@chr1:110888161:110888271:+@chr1:110888930:110889303:+	0.23	0.27	0.46	0.38	0.32	0.27	0.33	0.17	0.0478367	0.129266	0.472661	0.0708921	0.123179	0.2506	0.4235	0.3005	0.2575	-0.1729	-0.0499	-0.0069	0.123	0.166	0.1729	0.0499	0.0069	0.123	0.166	TRUE	FALSE	FALSE	FALSE	FALSE	TRUE	FALSE	TRUE	TRUE	TRUE	TRUE	TRUE	TRUE
SE	ENSG00000143476	DTL	chr1:212240154:212240227:+@chr1:212241566:212241669:+@chr1:212241941:212242045:+	0.75	0.72	0.68	0.65	0.6	0.7	0.64	0.65	0.043527	0.171218	0.0436822	0.420507	0.229064	0.7356	0.6685	0.6555	0.6525	0.0671	0.0801	0.0831	0.013	0.016	0.0671	0.0801	0.0831	0.013	0.016	TRUE	FALSE	TRUE	FALSE	FALSE	TRUE	FALSE	FALSE	TRUE	FALSE	TRUE	TRUE	FALSE
SE	NA	NA	chr1:43232916:43233061:+@chr1:43239234:43239320:+@chr1:43240408:43240539:+	0.69	0.65	0.77	0.82	0.4	0.82	0.64	0.69	0.0320515	0.418566	0.479559	0.271685	0.0365266	0.6706	0.7985	0.6155	0.6725	-0.1279	0.0551	-0.0019	0.183	0.126	0.1279	0.0551	0.0019	0.183	0.126	TRUE	FALSE	FALSE	FALSE	TRUE	TRUE	TRUE	TRUE	TRUE	TRUE	TRUE	TRUE	TRUE
SE	ENSG00000116717	GADD45A	chr1:68150860:68151221:+@chr1:68151708:68151809:+@chr1:68153344:68154021:+	0.46	0.46	0.3	0.31	0.31	0.32	0.43	0.36	0.0111609	0.0121264	0.170551	0.131423	0.108348	0.4606	0.3085	0.3205	0.4025	0.1521	0.1401	0.0581	-0.012	-0.094	0.1521	0.1401	0.0581	0.012	0.094	TRUE	TRUE	FALSE	FALSE	FALSE	TRUE	FALSE	FALSE	TRUE	FALSE	TRUE	FALSE	TRUE
SE	ENSG00000160058	BSDC1	chr1:32859681:32859741:-@chr1:32849431:32849598:-@chr1:32846815:32846869:-	0.41	0.44	0.56	0.55	0.4	0.63	0.56	0.58	0.0253761	0.280582	0.00909824	0.398833	0.14643	0.4256	0.5585	0.5205	0.5775	-0.1329	-0.0949	-0.1519	0.038	-0.019	0.1329	0.0949	0.1519	0.038	0.019	TRUE	FALSE	TRUE	FALSE	FALSE	TRUE	FALSE	FALSE	TRUE	FALSE	TRUE	TRUE	FALSE
SE	ENSG00000160679	CHTOP	chr1:153610771:153610924:+@chr1:153614719:153614905:+@chr1:153617540:153618782:+	0.7	0.68	0.54	0.59	0.59	0.62	0.65	0.67	0.0472778	0.031677	0.12924	0.159105	0.0612233	0.6906	0.5685	0.6105	0.6675	0.1221	0.0801	0.0231	-0.042	-0.099	0.1221	0.0801	0.0231	0.042	0.099	TRUE	TRUE	FALSE	FALSE	FALSE	TRUE	FALSE	FALSE	TRUE	FALSE	TRUE	FALSE	TRUE
SE	ENSG00000188807	TMEM201	chr1:9670564:9670863:+@chr1:9671073:9671131:+@chr1:9671811:9671948:+	0.15	0.13	0.09	0.08	0.46	0.21	0.07	0.26	0.0431686	0.176564	0.397448	0.145894	0.270279	0.1406	0.0885	0.3405	0.1725	0.0521	-0.1999	-0.0319	-0.252	-0.084	0.0521	0.1999	0.0319	0.252	0.084	TRUE	FALSE	FALSE	FALSE	FALSE	TRUE	FALSE	TRUE	TRUE	TRUE	TRUE	TRUE	TRUE
SE	ENSG00000117691	NENF	chr1:212606229:212606462:+@chr1:212615888:212615967:+@chr1:212617681:212617784:+	0.67	0.57	0.45	0.35	0.44	0.37	0.24	0.57	0.0458034	0.044544	0.20835	0.459673	0.482928	0.6206	0.4035	0.4105	0.4125	0.2171	0.2101	0.2081	-0.007	-0.009	0.2171	0.2101	0.2081	0.007	0.009	TRUE	TRUE	FALSE	FALSE	FALSE	TRUE	FALSE	FALSE	TRUE	FALSE	TRUE	FALSE	TRUE
SE	ENSG00000254685,ENSG00000116783,ENSG00000259030	FPGT,FPGT-TNNI3K	chr1:74665348:74665515:+@chr1:74666376:74666502:+@chr1:74667002:74667094:+	0.05	0.03	0.17	0.14	0.36	0.08	0.15	0.3	0.0141116	0.20527	0.116636	0.357469	0.251587	0.0406	0.1585	0.2255	0.2325	-0.1179	-0.1849	-0.1919	-0.067	-0.074	0.1179	0.1849	0.1919	0.067	0.074	TRUE	FALSE	FALSE	FALSE	FALSE	TRUE	FALSE	TRUE	TRUE	TRUE	TRUE	TRUE	TRUE
SE	ENSG00000143774	GUK1	chr1:228335316:228335400:+@chr1:228336072:228336157:+@chr1:228336366:228336655:+	0.84	0.83	0.74	0.71	0.72	0.78	0.85	0.83	0.0289571	0.111445	0.207098	0.267563	0.0149112	0.8356	0.7285	0.7555	0.8475	0.1071	0.0801	-0.0119	-0.027	-0.119	0.1071	0.0801	0.0119	0.027	0.119	TRUE	FALSE	FALSE	FALSE	TRUE	TRUE	TRUE	TRUE	TRUE	TRUE	TRUE	TRUE	TRUE
SE	ENSG00000043514	TRIT1	chr1:40348990:40349177:-@chr1:40318403:40318548:-@chr1:40315791:40315933:-	0.56	0.5	0.36	0.31	0.37	0.56	0.52	0.46	0.0212423	0.320996	0.258225	0.194394	0.0283237	0.5306	0.3385	0.4705	0.4975	0.1921	0.0601	0.0331	-0.132	-0.159	0.1921	0.0601	0.0331	0.132	0.159	TRUE	FALSE	FALSE	FALSE	TRUE	TRUE	TRUE	TRUE	TRUE	TRUE	TRUE	TRUE	TRUE
SE	ENSG00000117682	DHDDS	chr1:26772807:26772923:+@chr1:26774050:26774160:+@chr1:26784282:26784396:+	0.67	0.75	0.47	0.43	0.48	0.54	0.7	0.6	0.0277244	0.0330755	0.247007	0.125141	0.0579584	0.7106	0.4535	0.5155	0.6575	0.2571	0.1951	0.0531	-0.062	-0.204	0.2571	0.1951	0.0531	0.062	0.204	TRUE	TRUE	FALSE	FALSE	FALSE	TRUE	FALSE	FALSE	TRUE	FALSE	TRUE	FALSE	TRUE
SE	ENSG00000116209	TMEM59	chr1:54519029:54519177:-@chr1:54512940:54513045:-@chr1:54511365:54511459:-	0.83	0.8	0.71	0.7	0.72	0.85	0.75	0.8	0.0356703	0.383881	0.201395	0.214172	0.101176	0.8156	0.7085	0.7905	0.7825	0.1071	0.0251	0.0331	-0.082	-0.074	0.1071	0.0251	0.0331	0.082	0.074	TRUE	FALSE	FALSE	FALSE	FALSE	TRUE	FALSE	TRUE	TRUE	TRUE	TRUE	TRUE	TRUE
SE	ENSG00000228106	RP11-452F19.3	chr1:222988364:222988420:+@chr1:222997198:222997287:+@chr1:223000770:223000943:+	0.73	0.82	0.44	0.45	0.67	0.78	0.66	0.76	0.0411493	0.296917	0.240291	0.0604075	0.057346	0.7756	0.4485	0.7305	0.7175	0.3271	0.0451	0.0581	-0.282	-0.269	0.3271	0.0451	0.0581	0.282	0.269	TRUE	FALSE	FALSE	FALSE	FALSE	TRUE	FALSE	TRUE	TRUE	TRUE	TRUE	TRUE	TRUE
SE	ENSG00000116809	ZBTB17	chr1:16299534:16299620:-@chr1:16274790:16274992:-@chr1:16273430:16273618:-	0.39	0.46	0.67	0.63	0.51	0.33	0.48	0.29	0.0242317	0.499653	0.394191	0.112738	0.104692	0.4256	0.6535	0.4255	0.3925	-0.2279	0.0001	0.0331	0.228	0.261	0.2279	0.0001	0.0331	0.228	0.261	TRUE	FALSE	FALSE	FALSE	FALSE	TRUE	FALSE	TRUE	TRUE	TRUE	TRUE	TRUE	TRUE
SE	ENSG00000117226	GBP3	chr1:89488367:89488549:-@chr1:89486215:89486426:-@chr1:89480970:89481097:-	0.87	0.88	0.81	0.78	0.75	0.81	0.7	0.8	0.0469388	0.100577	0.127464	0.374868	0.281334	0.8756	0.7985	0.7855	0.7575	0.0771	0.0901	0.1181	0.013	0.041	0.0771	0.0901	0.1181	0.013	0.041	TRUE	FALSE	FALSE	FALSE	FALSE	TRUE	FALSE	TRUE	TRUE	TRUE	TRUE	TRUE	TRUE
SE	ENSG00000116791	CRYZ	chr1:75198640:75199092:-@chr1:75196066:75196104:-@chr1:75190395:75190518:-	0.21	0.2	0.25	0.26	0.22	0.14	0.14	0.27	0.0102975	0.350137	0.466616	0.155597	0.304975	0.2056	0.2585	0.1855	0.2125	-0.0529	0.0201	-0.0069	0.073	0.046	0.0529	0.0201	0.0069	0.073	0.046	TRUE	FALSE	FALSE	FALSE	FALSE	TRUE	FALSE	TRUE	TRUE	TRUE	TRUE	TRUE	TRUE
SE	ENSG00000117475	BLZF1	chr1:169349719:169349847:+@chr1:169351300:169351519:+@chr1:169356235:169356447:+	0.96	0.96	0.89	0.9	0.93	0.95	0.93	0.93	0.0275349	0.193269	0.000503224	0.0450144	0.043486	0.9606	0.8985	0.9455	0.9375	0.0621	0.0151	0.0231	-0.047	-0.039	0.0621	0.0151	0.0231	0.047	0.039	TRUE	FALSE	FALSE	FALSE	FALSE	TRUE	FALSE	TRUE	TRUE	TRUE	TRUE	TRUE	TRUE
SE	ENSG00000227232	WASH7P	chr1:24738:24891:-@chr1:18913:19139:-@chr1:18268:18379:-	0.75	0.71	0.43	0.49	0.57	0.7	0.71	0.53	0.0131132	0.193465	0.224548	0.0918471	0.148212	0.7306	0.4635	0.6405	0.6275	0.2671	0.0901	0.1031	-0.177	-0.164	0.2671	0.0901	0.1031	0.177	0.164	TRUE	FALSE	FALSE	FALSE	FALSE	TRUE	FALSE	TRUE	TRUE	TRUE	TRUE	TRUE	TRUE
SE	ENSG00000117335	CD46	chr1:207940358:207940540:+@chr1:207941124:207941168:+@chr1:207956637:207956675:+	0.46	0.4	0.84	0.72	0.62	0.49	0.4	0.49	0.0306278	0.129174	0.366305	0.063497	0.0268073	0.4306	0.7835	0.5605	0.4525	-0.3529	-0.1299	-0.0219	0.223	0.331	0.3529	0.1299	0.0219	0.223	0.331	TRUE	FALSE	FALSE	FALSE	TRUE	TRUE	TRUE	TRUE	TRUE	TRUE	TRUE	TRUE	TRUE
SE	ENSG00000243452	NBPF15	chr1:148555979:148556272:+@chr1:148558169:148558287:+@chr1:148560847:148561115:+	0.13	0.15	0.07	0.04	0.13	0.05	0.07	0.08	0.0274505	0.225678	0.0272142	0.257243	0.161831	0.1406	0.0585	0.0955	0.0825	0.0821	0.0451	0.0581	-0.037	-0.024	0.0821	0.0451	0.0581	0.037	0.024	TRUE	FALSE	TRUE	FALSE	FALSE	TRUE	FALSE	FALSE	TRUE	FALSE	TRUE	TRUE	FALSE
SE	ENSG00000159023	EPB41	chr1:29379616:29379824:+@chr1:29385101:29385157:+@chr1:29386934:29386996:+	0.17	0.12	0.32	0.31	0.08	0.09	0.51	0.26	0.0423615	0.131694	0.143753	0.000600441	0.329285	0.1456	0.3185	0.0905	0.3925	-0.1729	0.0551	-0.2469	0.228	-0.074	0.1729	0.0551	0.2469	0.228	0.074	TRUE	FALSE	FALSE	TRUE	FALSE	TRUE	TRUE	TRUE	TRUE	TRUE	TRUE	TRUE	TRUE
SE	ENSG00000117616	C1orf63	chr1:25571641:25571792:-@chr1:25570945:25570989:-@chr1:25570041:25570715:-	0.21	0.21	0.06	0.07	0.05	0.17	0.05	0.09	0.0119541	0.180348	0.0485901	0.289544	0.368742	0.2106	0.0685	0.1155	0.0775	0.1421	0.0951	0.1331	-0.047	-0.009	0.1421	0.0951	0.1331	0.047	0.009	TRUE	FALSE	TRUE	FALSE	FALSE	TRUE	FALSE	FALSE	TRUE	FALSE	TRUE	TRUE	FALSE
SE	NA	NA	chr1:15796:15947:-@chr1:14970:15038:-@chr1:14362:14829:-	0.94	0.96	0.9	0.88	0.87	0.93	0.94	0.92	0.0258303	0.181785	0.217201	0.381516	0.0409688	0.9506	0.8935	0.9055	0.9375	0.0571	0.0451	0.0131	-0.012	-0.044	0.0571	0.0451	0.0131	0.012	0.044	TRUE	FALSE	FALSE	FALSE	FALSE	TRUE	FALSE	TRUE	TRUE	TRUE	TRUE	TRUE	TRUE
SE	ENSG00000117143	UAP1	chr1:162560113:162560301:+@chr1:162562522:162562572:+@chr1:162567582:162567648:+	0.32	0.38	0.23	0.17	0.25	0.23	0.27	0.19	0.0360457	0.0742498	0.0794572	0.187588	0.283314	0.3506	0.2035	0.2455	0.2375	0.1471	0.1051	0.1131	-0.042	-0.034	0.1471	0.1051	0.1131	0.042	0.034	TRUE	FALSE	FALSE	FALSE	FALSE	TRUE	FALSE	TRUE	TRUE	TRUE	TRUE	TRUE	TRUE
SE	ENSG00000196517	SLC6A9	chr1:44489920:44490034:-@chr1:44475637:44475768:-@chr1:44474025:44474295:-	0.55	0.57	0.67	0.69	0.48	0.55	0.48	0.3	0.00672948	0.226877	0.158392	0.0569881	0.0944677	0.5606	0.6835	0.5205	0.3975	-0.1229	0.0401	0.1631	0.163	0.286	0.1229	0.0401	0.1631	0.163	0.286	TRUE	FALSE	FALSE	FALSE	FALSE	TRUE	FALSE	TRUE	TRUE	TRUE	TRUE	TRUE	TRUE
SE	ENSG00000143393	PI4KB	chr1:151299747:151300191:-@chr1:151298648:151298849:-@chr1:151288049:151288985:-	0.59	0.61	0.49	0.47	0.61	0.57	0.45	0.44	0.00652362	0.421581	0.00858928	0.0332109	0.0721573	0.6006	0.4835	0.5955	0.4525	0.1171	0.0051	0.1481	-0.112	0.031	0.1171	0.0051	0.1481	0.112	0.031	TRUE	FALSE	TRUE	TRUE	FALSE	TRUE	TRUE	FALSE	TRUE	FALSE	TRUE	TRUE	FALSE
SE	ENSG00000117054	ACADM	chr1:76198538:76198607:+@chr1:76198736:76198834:+@chr1:76199213:76199313:+	0.03	0.02	0.23	0.23	0.12	0.04	0.14	0.04	0.00782475	0.183754	0.190804	0.0829943	0.111096	0.0256	0.2335	0.0855	0.0975	-0.2079	-0.0599	-0.0719	0.148	0.136	0.2079	0.0599	0.0719	0.148	0.136	TRUE	FALSE	FALSE	FALSE	FALSE	TRUE	FALSE	TRUE	TRUE	TRUE	TRUE	TRUE	TRUE
SE	ENSG00000085999	RAD54L	chr1:46738344:46738474:+@chr1:46739027:46739137:+@chr1:46739296:46739419:+	0.88	0.91	0.83	0.79	0.75	0.83	0.91	0.88	0.043221	0.107921	0.384643	0.370088	0.0377968	0.8956	0.8135	0.7955	0.9025	0.0821	0.1001	-0.0069	0.018	-0.089	0.0821	0.1001	0.0069	0.018	0.089	TRUE	FALSE	FALSE	FALSE	TRUE	TRUE	TRUE	TRUE	TRUE	TRUE	TRUE	TRUE	TRUE
SE	ENSG00000197568	HHLA3	chr1:70832127:70832220:+@chr1:70832616:70832667:+@chr1:70833300:70833705:+	0.16	0.17	0.27	0.24	0.13	0.05	0.18	0.14	0.0377531	0.161774	0.469303	0.0595966	0.0364093	0.1656	0.2585	0.0955	0.1675	-0.0929	0.0701	-0.0019	0.163	0.091	0.0929	0.0701	0.0019	0.163	0.091	TRUE	FALSE	FALSE	FALSE	TRUE	TRUE	TRUE	TRUE	TRUE	TRUE	TRUE	TRUE	TRUE
SE	ENSG00000169242	EFNA1	chr1:155103815:155104110:+@chr1:155105979:155106044:+@chr1:155106206:155106256:+	0.96	0.95	0.89	0.88	0.77	0.9	0.87	0.9	0.00598214	0.163895	0.0617931	0.298588	0.420337	0.9556	0.8885	0.8405	0.8925	0.0671	0.1151	0.0631	0.048	-0.004	0.0671	0.1151	0.0631	0.048	0.004	TRUE	FALSE	FALSE	FALSE	FALSE	TRUE	FALSE	TRUE	TRUE	TRUE	TRUE	TRUE	TRUE
SE	ENSG00000065243	PKN2	chr1:89251787:89251896:+@chr1:89270074:89270217:+@chr1:89270529:89270604:+	0.77	0.79	0.69	0.71	0.73	0.76	0.74	0.77	0.016485	0.132143	0.221329	0.0727913	0.0515427	0.7806	0.7035	0.7505	0.7625	0.0771	0.0301	0.0181	-0.047	-0.059	0.0771	0.0301	0.0181	0.047	0.059	TRUE	FALSE	FALSE	FALSE	FALSE	TRUE	FALSE	TRUE	TRUE	TRUE	TRUE	TRUE	TRUE
SE	ENSG00000215883,ENSG00000256407	CYB5RL,RP11-446E24.4	chr1:54649834:54649938:-@chr1:54644822:54645025:-@chr1:54638027:54640495:-	0.9	0.91	0.84	0.83	0.85	0.79	0.9	0.82	0.00454364	0.108856	0.255115	0.367936	0.298134	0.9056	0.8385	0.8255	0.8675	0.0671	0.0801	0.0381	0.013	-0.029	0.0671	0.0801	0.0381	0.013	0.029	TRUE	FALSE	FALSE	FALSE	FALSE	TRUE	FALSE	TRUE	TRUE	TRUE	TRUE	TRUE	TRUE
SE	ENSG00000085999	RAD54L	chr1:46733131:46733281:+@chr1:46736331:46736457:+@chr1:46738138:46738212:+	0.92	0.9	0.84	0.85	0.79	0.71	0.87	0.93	0.0295376	0.0699578	0.468307	0.125197	0.148026	0.9106	0.8485	0.7555	0.9075	0.0621	0.1551	0.0031	0.093	-0.059	0.0621	0.1551	0.0031	0.093	0.059	TRUE	FALSE	FALSE	FALSE	FALSE	TRUE	FALSE	TRUE	TRUE	TRUE	TRUE	TRUE	TRUE
SE	NA	NA	chr1:227834245:227834371:+@chr1:227838657:227838777:+@chr1:227842037:227850164:+	0.33	0.36	0.46	0.51	0.55	0.52	0.41	0.31	0.030615	0.00548259	0.367994	0.12495	0.101548	0.3456	0.4885	0.5405	0.3675	-0.1429	-0.1949	-0.0219	-0.052	0.121	0.1429	0.1949	0.0219	0.052	0.121	TRUE	TRUE	FALSE	FALSE	FALSE	TRUE	FALSE	FALSE	TRUE	FALSE	TRUE	FALSE	TRUE
SE	ENSG00000116171	SCP2	chr1:53392901:53393137:+@chr1:53407468:53407525:+@chr1:53413681:53413752:+	0.94	0.91	0.85	0.83	0.79	0.88	0.92	0.91	0.0314982	0.145383	0.437423	0.479159	0.0202573	0.9256	0.8435	0.8405	0.9225	0.0821	0.0851	0.0031	0.003	-0.079	0.0821	0.0851	0.0031	0.003	0.079	TRUE	FALSE	FALSE	FALSE	TRUE	TRUE	TRUE	TRUE	TRUE	TRUE	TRUE	TRUE	TRUE
SE	ENSG00000116786	PLEKHM2	chr1:16046229:16046415:+@chr1:16047824:16047883:+@chr1:16051812:16052040:+	0.41	0.43	0.35	0.37	0.38	0.4	0.4	0.35	0.0287969	0.110371	0.171226	0.081976	0.28924	0.4206	0.3635	0.3955	0.3825	0.0571	0.0251	0.0381	-0.032	-0.019	0.0571	0.0251	0.0381	0.032	0.019	TRUE	FALSE	FALSE	FALSE	FALSE	TRUE	FALSE	TRUE	TRUE	TRUE	TRUE	TRUE	TRUE
SE	ENSG00000117543	DPH5	chr1:101460666:101460705:-@chr1:101458193:101458296:-@chr1:101455180:101456184:-	0.08	0.1	0.18	0.19	0.22	0.12	0.11	0.06	0.0121037	0.164055	0.475963	0.418327	0.0724321	0.0906	0.1885	0.1755	0.0925	-0.0979	-0.0849	-0.0019	0.013	0.096	0.0979	0.0849	0.0019	0.013	0.096	TRUE	FALSE	FALSE	FALSE	FALSE	TRUE	FALSE	TRUE	TRUE	TRUE	TRUE	TRUE	TRUE
SE	ENSG00000143190	POU2F1	chr1:167353094:167353188:+@chr1:167358825:167358998:+@chr1:167365523:167365664:+	0.63	0.69	0.81	0.78	0.7	0.78	0.8	0.79	0.0442287	0.121964	0.062104	0.200416	0.415205	0.6606	0.7985	0.7455	0.8025	-0.1379	-0.0849	-0.1419	0.053	-0.004	0.1379	0.0849	0.1419	0.053	0.004	TRUE	FALSE	FALSE	FALSE	FALSE	TRUE	FALSE	TRUE	TRUE	TRUE	TRUE	TRUE	TRUE
SE	NA	NA	chr1:78958357:78959226:+@chr1:78963559:78963629:+@chr1:79002091:79006386:+	0.33	0.33	0.12	0.09	0.48	0.12	0.23	0.1	0.0206795	0.455777	0.123294	0.234811	0.2491	0.3306	0.1085	0.3055	0.1725	0.2221	0.0251	0.1581	-0.197	-0.064	0.2221	0.0251	0.1581	0.197	0.064	TRUE	FALSE	FALSE	FALSE	FALSE	TRUE	FALSE	TRUE	TRUE	TRUE	TRUE	TRUE	TRUE
SE	ENSG00000163479	SSR2	chr1:155987923:155988159:-@chr1:155984752:155984860:-@chr1:155981601:155981678:-	0.3	0.24	0.15	0.12	0.09	0.06	0.25	0.19	0.0493467	0.0299775	0.208036	0.0527864	0.0788217	0.2706	0.1385	0.0805	0.2275	0.1321	0.1901	0.0431	0.058	-0.089	0.1321	0.1901	0.0431	0.058	0.089	TRUE	TRUE	FALSE	FALSE	FALSE	TRUE	FALSE	FALSE	TRUE	FALSE	TRUE	FALSE	TRUE
SE	ENSG00000143756	FBXO28	chr1:224318174:224318283:+@chr1:224321776:224321914:+@chr1:224340844:224341039:+	0.92	0.94	0.88	0.85	0.85	0.91	0.93	0.82	0.0430837	0.181785	0.268766	0.340629	0.420544	0.9306	0.8685	0.8855	0.8825	0.0621	0.0451	0.0481	-0.017	-0.014	0.0621	0.0451	0.0481	0.017	0.014	TRUE	FALSE	FALSE	FALSE	FALSE	TRUE	FALSE	TRUE	TRUE	TRUE	TRUE	TRUE	TRUE
SE	ENSG00000171163	ZNF692	chr1:249149924:249150145:-@chr1:249149757:249149834:-@chr1:249149579:249149657:-	0.79	0.76	0.65	0.67	0.59	0.84	0.65	0.74	0.0176964	0.368343	0.167959	0.3643	0.272943	0.7756	0.6635	0.7205	0.7025	0.1121	0.0551	0.0731	-0.057	-0.039	0.1121	0.0551	0.0731	0.057	0.039	TRUE	FALSE	FALSE	FALSE	FALSE	TRUE	FALSE	TRUE	TRUE	TRUE	TRUE	TRUE	TRUE
SE	ENSG00000008128	CDK11A	chr1:1647785:1647917:-@chr1:1643703:1643866:-@chr1:1640957:1641079:-	0.49	0.44	0.66	0.66	0.37	0.77	0.55	0.58	0.0405811	0.340323	0.0456504	0.368351	0.0535514	0.4656	0.6635	0.5755	0.5725	-0.1979	-0.1099	-0.1069	0.088	0.091	0.1979	0.1099	0.1069	0.088	0.091	TRUE	FALSE	TRUE	FALSE	FALSE	TRUE	FALSE	FALSE	TRUE	FALSE	TRUE	TRUE	FALSE
SE	ENSG00000117155	SSX2IP	chr1:85155837:85156151:-@chr1:85145971:85146070:-@chr1:85136860:85136991:-	0.09	0.06	0.16	0.17	0.21	0.13	0.21	0.07	0.0381497	0.103528	0.242295	0.44428	0.406632	0.0756	0.1685	0.1755	0.1475	-0.0929	-0.0999	-0.0719	-0.007	0.021	0.0929	0.0999	0.0719	0.007	0.021	TRUE	FALSE	FALSE	FALSE	FALSE	TRUE	FALSE	TRUE	TRUE	TRUE	TRUE	TRUE	TRUE
SE	ENSG00000227232	WASH7P	chr1:24738:24891:-@chr1:18268:18379:-@chr1:17915:18061:-	0.59	0.65	0.81	0.74	0.61	0.55	0.7	0.56	0.0381282	0.244681	0.426018	0.0266432	0.127301	0.6206	0.7785	0.5855	0.6375	-0.1579	0.0351	-0.0169	0.193	0.141	0.1579	0.0351	0.0169	0.193	0.141	TRUE	FALSE	FALSE	TRUE	FALSE	TRUE	TRUE	TRUE	TRUE	TRUE	TRUE	TRUE	TRUE
SE	ENSG00000118454	ANKRD13C	chr1:70801741:70801782:-@chr1:70790536:70790640:-@chr1:70781164:70781249:-	0.5	0.47	0.33	0.36	0.41	0.58	0.42	0.67	0.0122365	0.445271	0.344053	0.159475	0.173944	0.4856	0.3485	0.5005	0.5525	0.1371	-0.0149	-0.0669	-0.152	-0.204	0.1371	0.0149	0.0669	0.152	0.204	TRUE	FALSE	FALSE	FALSE	FALSE	TRUE	FALSE	TRUE	TRUE	TRUE	TRUE	TRUE	TRUE
SE	ENSG00000143344	RGL1	chr1:183711261:183711424:+@chr1:183775509:183775619:+@chr1:183816700:183816908:+	0.38	0.39	0.54	0.5	0.48	0.36	0.73	0.81	0.0379648	0.311873	0.0312731	0.16457	0.0296366	0.3856	0.5235	0.4255	0.7775	-0.1379	-0.0399	-0.3919	0.098	-0.254	0.1379	0.0399	0.3919	0.098	0.254	TRUE	FALSE	TRUE	FALSE	TRUE	TRUE	TRUE	FALSE	TRUE	FALSE	TRUE	TRUE	FALSE
SE	ENSG00000160058	BSDC1	chr1:32859681:32859741:-@chr1:32852380:32852496:-@chr1:32849431:32849598:-	0.91	0.89	0.76	0.8	0.74	0.87	0.86	0.81	0.0324919	0.197965	0.109371	0.376347	0.104975	0.9006	0.7835	0.8105	0.8425	0.1171	0.0901	0.0581	-0.027	-0.059	0.1171	0.0901	0.0581	0.027	0.059	TRUE	FALSE	FALSE	FALSE	FALSE	TRUE	FALSE	TRUE	TRUE	TRUE	TRUE	TRUE	TRUE
SE	ENSG00000185630	PBX1	chr1:164776779:164776914:+@chr1:164781227:164781386:+@chr1:164790774:164790863:+	0.88	0.87	0.81	0.83	0.68	0.83	0.84	0.87	0.0393271	0.184277	0.274569	0.278048	0.0949451	0.8756	0.8235	0.7605	0.8625	0.0521	0.1151	0.0131	0.063	-0.039	0.0521	0.1151	0.0131	0.063	0.039	TRUE	FALSE	FALSE	FALSE	FALSE	TRUE	FALSE	TRUE	TRUE	TRUE	TRUE	TRUE	TRUE
SE	ENSG00000163374	YY1AP1	chr1:155640111:155640255:-@chr1:155638418:155638568:-@chr1:155631098:155631214:-	0.92	0.93	0.86	0.88	0.77	0.92	0.88	0.88	0.0433956	0.250654	0.0367649	0.405996	0.204638	0.9256	0.8735	0.8505	0.8875	0.0521	0.0751	0.0381	0.023	-0.014	0.0521	0.0751	0.0381	0.023	0.014	TRUE	FALSE	FALSE	FALSE	FALSE	TRUE	FALSE	TRUE	TRUE	TRUE	TRUE	TRUE	TRUE
SE	ENSG00000058453	CROCC	chr1:17256924:17257089:+@chr1:17257786:17257892:+@chr1:17263132:17263368:+	0.76	0.79	0.66	0.61	0.59	0.72	0.67	0.8	0.0298496	0.159474	0.351118	0.398383	0.168504	0.7756	0.6385	0.6605	0.7425	0.1371	0.1151	0.0331	-0.022	-0.104	0.1371	0.1151	0.0331	0.022	0.104	TRUE	FALSE	FALSE	FALSE	FALSE	TRUE	FALSE	TRUE	TRUE	TRUE	TRUE	TRUE	TRUE
SE	ENSG00000225241	NBPF8	chr1:144593363:144593965:+@chr1:144595854:144595952:+@chr1:144598512:144598780:+	0.18	0.1	0.4	0.33	0.3	0.27	0.35	0.36	0.0262353	0.0681596	0.0546884	0.115619	0.445336	0.1406	0.3685	0.2905	0.3625	-0.2279	-0.1499	-0.2219	0.078	0.006	0.2279	0.1499	0.2219	0.078	0.006	TRUE	FALSE	FALSE	FALSE	FALSE	TRUE	FALSE	TRUE	TRUE	TRUE	TRUE	TRUE	TRUE
SE	ENSG00000160688	FLAD1	chr1:154962635:154962733:+@chr1:154962815:154963004:+@chr1:154965041:154965149:+	0.7	0.73	0.78	0.76	0.65	0.76	0.74	0.69	0.0488544	0.471101	0.417882	0.228093	0.128136	0.7156	0.7735	0.7105	0.7225	-0.0579	0.0051	-0.0069	0.063	0.051	0.0579	0.0051	0.0069	0.063	0.051	TRUE	FALSE	FALSE	FALSE	FALSE	TRUE	FALSE	TRUE	TRUE	TRUE	TRUE	TRUE	TRUE
SE	NA	NA	chr1:249148136:249148250:-@chr1:249144881:249144980:-@chr1:249144203:249144715:-	0.94	0.96	0.89	0.86	0.9	0.91	0.9	0.85	0.0339268	0.0474884	0.0928862	0.120837	0.451848	0.9506	0.8785	0.9105	0.8825	0.0721	0.0401	0.0681	-0.032	-0.004	0.0721	0.0401	0.0681	0.032	0.004	TRUE	FALSE	FALSE	FALSE	FALSE	TRUE	FALSE	TRUE	TRUE	TRUE	TRUE	TRUE	TRUE
SE	ENSG00000171163	ZNF692	chr1:249152330:249152520:-@chr1:249152027:249152233:-@chr1:249151433:249151635:-	0.5	0.55	0.74	0.75	0.5	0.3	0.48	0.5	0.0294706	0.21648	0.222694	0.0893987	0.00376093	0.5256	0.7485	0.4055	0.4975	-0.2229	0.1201	0.0281	0.343	0.251	0.2229	0.1201	0.0281	0.343	0.251	TRUE	FALSE	FALSE	FALSE	TRUE	TRUE	TRUE	TRUE	TRUE	TRUE	TRUE	TRUE	TRUE
SE	ENSG00000171163	ZNF692	chr1:249152330:249152520:-@chr1:249152027:249152216:-@chr1:249151433:249151635:-	0.41	0.49	0.65	0.71	0.41	0.49	0.4	0.36	0.0242802	0.469474	0.164904	0.026334	0.0115356	0.4506	0.6835	0.4555	0.3875	-0.2329	-0.0049	0.0631	0.228	0.296	0.2329	0.0049	0.0631	0.228	0.296	TRUE	FALSE	FALSE	TRUE	TRUE	TRUE	TRUE	TRUE	TRUE	TRUE	TRUE	TRUE	TRUE
SE	ENSG00000175279,ENSG00000251503	APITD1,APITD1-CORT	chr1:10490804:10491458:+@chr1:10494714:10494747:+@chr1:10500404:10500470:+	0.08	0.06	0.13	0.16	0.2	0.11	0.11	0.09	0.0331515	0.139961	0.060516	0.417352	0.0891601	0.0706	0.1485	0.1605	0.1075	-0.0779	-0.0899	-0.0369	-0.012	0.041	0.0779	0.0899	0.0369	0.012	0.041	TRUE	FALSE	FALSE	FALSE	FALSE	TRUE	FALSE	TRUE	TRUE	TRUE	TRUE	TRUE	TRUE
SE	ENSG00000163131	CTSS	chr1:150730334:150730456:-@chr1:150727477:150727626:-@chr1:150724257:150724484:-	0.87	0.88	0.93	0.94	0.9	0.93	0.89	0.89	0.00700043	0.0945467	0.0641446	0.22064	0.0413574	0.8756	0.9385	0.9205	0.8975	-0.0629	-0.0449	-0.0219	0.018	0.041	0.0629	0.0449	0.0219	0.018	0.041	TRUE	FALSE	FALSE	FALSE	FALSE	TRUE	FALSE	TRUE	TRUE	TRUE	TRUE	TRUE	TRUE
SE	ENSG00000204178	TMEM57	chr1:25780750:25780873:+@chr1:25783064:25783322:+@chr1:25784882:25785383:+	0.79	0.77	0.86	0.84	0.83	0.79	0.87	0.81	0.0179857	0.145483	0.118824	0.13345	0.43697	0.7806	0.8535	0.8155	0.8475	-0.0729	-0.0349	-0.0669	0.038	0.006	0.0729	0.0349	0.0669	0.038	0.006	TRUE	FALSE	FALSE	FALSE	FALSE	TRUE	FALSE	TRUE	TRUE	TRUE	TRUE	TRUE	TRUE
SE	ENSG00000134744	ZCCHC11	chr1:52975268:52975384:-@chr1:52962678:52962855:-@chr1:52961099:52961187:-	0.83	0.82	0.77	0.76	0.7	0.76	0.83	0.83	0.00813077	0.0993981	0.134438	0.23623	0.0195964	0.8256	0.7685	0.7355	0.8375	0.0571	0.0901	-0.0119	0.033	-0.069	0.0571	0.0901	0.0119	0.033	0.069	TRUE	FALSE	FALSE	FALSE	TRUE	TRUE	TRUE	TRUE	TRUE	TRUE	TRUE	TRUE	TRUE
SE	ENSG00000162613	FUBP1	chr1:78412215:78412261:-@chr1:78411191:78411327:-@chr1:78409740:78409954:-	0.66	0.52	0.12	0.2	0.33	0.08	0.15	0.15	0.027028	0.0744823	0.0512851	0.38608	0.453184	0.5906	0.1635	0.2105	0.1575	0.4271	0.3801	0.4331	-0.047	0.006	0.4271	0.3801	0.4331	0.047	0.006	TRUE	FALSE	FALSE	FALSE	FALSE	TRUE	FALSE	TRUE	TRUE	TRUE	TRUE	TRUE	TRUE
SE	ENSG00000142910	TINAGL1	chr1:32042735:32043059:+@chr1:32044805:32044868:+@chr1:32048750:32048842:+	0.86	0.89	0.96	0.95	0.91	0.93	0.95	0.95	0.044028	0.0605442	0.055982	0.0782552	0.430471	0.8756	0.9585	0.9255	0.9575	-0.0829	-0.0499	-0.0819	0.033	0.001	0.0829	0.0499	0.0819	0.033	0.001	TRUE	FALSE	FALSE	FALSE	FALSE	TRUE	FALSE	TRUE	TRUE	TRUE	TRUE	TRUE	TRUE
SE	ENSG00000160087	UBE2J2	chr1:1209046:1209234:-@chr1:1203242:1203372:-@chr1:1198726:1198766:-	0.74	0.77	0.69	0.65	0.66	0.79	0.6	0.65	0.043221	0.383829	0.0383359	0.269927	0.168574	0.7556	0.6735	0.7305	0.6325	0.0821	0.0251	0.1231	-0.057	0.041	0.0821	0.0251	0.1231	0.057	0.041	TRUE	FALSE	TRUE	FALSE	FALSE	TRUE	FALSE	FALSE	TRUE	FALSE	TRUE	TRUE	FALSE
SE	ENSG00000198160	MIER1	chr1:67405711:67405735:+@chr1:67405869:67405905:+@chr1:67411833:67411978:+	0.11	0.05	0.26	0.3	0.29	0.04	0.16	0.23	0.0206508	0.300087	0.0619013	0.26438	0.108812	0.0806	0.2835	0.1705	0.2025	-0.2029	-0.0899	-0.1219	0.113	0.081	0.2029	0.0899	0.1219	0.113	0.081	TRUE	FALSE	FALSE	FALSE	FALSE	TRUE	FALSE	TRUE	TRUE	TRUE	TRUE	TRUE	TRUE
SE	ENSG00000158161	EYA3	chr1:28365350:28365416:-@chr1:28362055:28362191:-@chr1:28343665:28343750:-	0.46	0.49	0.57	0.61	0.51	0.54	0.58	0.6	0.025828	0.0618363	0.0134436	0.0715028	0.441367	0.4756	0.5935	0.5305	0.5975	-0.1179	-0.0549	-0.1219	0.063	-0.004	0.1179	0.0549	0.1219	0.063	0.004	TRUE	FALSE	TRUE	FALSE	FALSE	TRUE	FALSE	FALSE	TRUE	FALSE	TRUE	TRUE	FALSE
SE	ENSG00000117682	DHDDS	chr1:26772807:26772923:+@chr1:26774050:26774151:+@chr1:26784282:26784396:+	0.78	0.83	0.57	0.52	0.6	0.63	0.76	0.78	0.00887636	0.0178252	0.222694	0.0767298	0.0190349	0.8056	0.5485	0.6205	0.7775	0.2571	0.1851	0.0281	-0.072	-0.229	0.2571	0.1851	0.0281	0.072	0.229	TRUE	TRUE	FALSE	FALSE	TRUE	TRUE	TRUE	FALSE	TRUE	FALSE	TRUE	FALSE	TRUE
SE	ENSG00000159363	ATP13A2	chr1:17313300:17313451:-@chr1:17312958:17313127:-@chr1:17312453:17312853:-	0.78	0.75	0.58	0.58	0.57	0.73	0.57	0.68	0.0267404	0.197998	0.116326	0.267722	0.26977	0.7656	0.5835	0.6555	0.6325	0.1821	0.1101	0.1331	-0.072	-0.049	0.1821	0.1101	0.1331	0.072	0.049	TRUE	FALSE	FALSE	FALSE	FALSE	TRUE	FALSE	TRUE	TRUE	TRUE	TRUE	TRUE	TRUE
SE	ENSG00000221978	CCNL2	chr1:1328059:1328183:-@chr1:1326677:1326955:-@chr1:1326146:1326245:-	0.9	0.86	0.64	0.68	0.73	0.76	0.83	0.74	0.00864414	0.0211042	0.132093	0.0426349	0.0845095	0.8806	0.6635	0.7505	0.7925	0.2171	0.1301	0.0881	-0.087	-0.129	0.2171	0.1301	0.0881	0.087	0.129	TRUE	TRUE	FALSE	TRUE	FALSE	TRUE	TRUE	FALSE	TRUE	FALSE	TRUE	FALSE	TRUE
SE	ENSG00000228794	RP11-206L10.11	chr1:764383:764484:+@chr1:787307:787490:+@chr1:788051:788146:+	0.63	0.72	0.49	0.45	0.62	0.54	0.52	0.57	0.0489014	0.135668	0.0851485	0.0851941	0.0707308	0.6756	0.4735	0.5855	0.5525	0.2021	0.0901	0.1231	-0.112	-0.079	0.2021	0.0901	0.1231	0.112	0.079	TRUE	FALSE	FALSE	FALSE	FALSE	TRUE	FALSE	TRUE	TRUE	TRUE	TRUE	TRUE	TRUE
SE	ENSG00000116584	ARHGEF2	chr1:155936207:155936270:-@chr1:155935422:155935551:-@chr1:155935094:155935203:-	0.62	0.62	0.74	0.71	0.62	0.72	0.73	0.68	0.0424189	0.236716	0.0828893	0.238827	0.320913	0.6206	0.7285	0.6755	0.7125	-0.1079	-0.0549	-0.0919	0.053	0.016	0.1079	0.0549	0.0919	0.053	0.016	TRUE	FALSE	FALSE	FALSE	FALSE	TRUE	FALSE	TRUE	TRUE	TRUE	TRUE	TRUE	TRUE
SE	ENSG00000162813	BPNT1	chr1:220247309:220247413:-@chr1:220246192:220246299:-@chr1:220242726:220242774:-	0.46	0.45	0.56	0.58	0.5	0.64	0.45	0.53	0.0119788	0.168533	0.24365	0.490997	0.14868	0.4556	0.5735	0.5755	0.4975	-0.1179	-0.1199	-0.0419	-0.002	0.076	0.1179	0.1199	0.0419	0.002	0.076	TRUE	FALSE	FALSE	FALSE	FALSE	TRUE	FALSE	TRUE	TRUE	TRUE	TRUE	TRUE	TRUE
SE	ENSG00000197530	MIB2	chr1:1560175:1560281:+@chr1:1560371:1560565:+@chr1:1560666:1560808:+	0.9	0.93	0.86	0.83	0.82	0.86	0.87	0.91	0.0412834	0.0605203	0.276772	0.458438	0.102096	0.9156	0.8485	0.8455	0.8975	0.0671	0.0701	0.0181	0.003	-0.049	0.0671	0.0701	0.0181	0.003	0.049	TRUE	FALSE	FALSE	FALSE	FALSE	TRUE	FALSE	TRUE	TRUE	TRUE	TRUE	TRUE	TRUE
SE	NA	NA	chr1:28995240:28995351:+@chr1:29010098:29010252:+@chr1:29016616:29016698:+	0.55	0.52	0.63	0.59	0.61	0.48	0.64	0.55	0.0472447	0.428164	0.178098	0.250661	0.424985	0.5356	0.6135	0.5505	0.6025	-0.0779	-0.0149	-0.0669	0.063	0.011	0.0779	0.0149	0.0669	0.063	0.011	TRUE	FALSE	FALSE	FALSE	FALSE	TRUE	FALSE	TRUE	TRUE	TRUE	TRUE	TRUE	TRUE
SE	ENSG00000156171	DRAM2	chr1:111682660:111682838:-@chr1:111682123:111682288:-@chr1:111680145:111680208:-	0.89	0.88	0.82	0.8	0.82	0.87	0.84	0.82	0.0193444	0.196415	0.0358512	0.182992	0.107977	0.8856	0.8135	0.8505	0.8375	0.0721	0.0351	0.0481	-0.037	-0.024	0.0721	0.0351	0.0481	0.037	0.024	TRUE	FALSE	FALSE	FALSE	FALSE	TRUE	FALSE	TRUE	TRUE	TRUE	TRUE	TRUE	TRUE
SE	ENSG00000185044	BX004987.4	chr1:143367656:143367743:-@chr1:143361969:143362013:-@chr1:143356625:143357090:-	0.45	0.48	0.41	0.38	0.45	0.6	0.35	0.49	0.0412834	0.272833	0.342223	0.161411	0.375991	0.4656	0.3985	0.5305	0.4275	0.0671	-0.0649	0.0381	-0.132	-0.029	0.0671	0.0649	0.0381	0.132	0.029	TRUE	FALSE	FALSE	FALSE	FALSE	TRUE	FALSE	TRUE	TRUE	TRUE	TRUE	TRUE	TRUE
SE	ENSG00000187801	ZNF643	chr1:40916337:40916760:+@chr1:40919875:40919960:+@chr1:40922617:40922743:+	0.34	0.34	0.19	0.21	0.31	0.07	0.38	0.26	0.0241808	0.219298	0.431019	0.478741	0.138521	0.3406	0.2035	0.1955	0.3275	0.1371	0.1451	0.0131	0.008	-0.124	0.1371	0.1451	0.0131	0.008	0.124	TRUE	FALSE	FALSE	FALSE	FALSE	TRUE	FALSE	TRUE	TRUE	TRUE	TRUE	TRUE	TRUE
SE	ENSG00000123130	ACOT9	chrX:23739998:23740101:-@chrX:23731252:23731325:-@chrX:23725994:23726061:-	0.65	0.64	0.76	0.79	0.66	0.81	0.53	0.79	0.0252127	0.213515	0.447084	0.351603	0.27517	0.6456	0.7785	0.7405	0.6675	-0.1329	-0.0949	-0.0219	0.038	0.111	0.1329	0.0949	0.0219	0.038	0.111	TRUE	FALSE	FALSE	FALSE	FALSE	TRUE	FALSE	TRUE	TRUE	TRUE	TRUE	TRUE	TRUE
SE	NA	NA	chrX:100243182:100243272:+@chrX:100243367:100243547:+@chrX:100245551:100245820:+	0.45	0.32	0.17	0.07	0.38	0.23	0.25	0.18	0.0468779	0.264475	0.0986153	0.0952501	0.128501	0.3856	0.1235	0.3105	0.2225	0.2621	0.0751	0.1631	-0.187	-0.099	0.2621	0.0751	0.1631	0.187	0.099	TRUE	FALSE	FALSE	FALSE	FALSE	TRUE	FALSE	TRUE	TRUE	TRUE	TRUE	TRUE	TRUE
SE	ENSG00000102081	FMR1	chrX:147018985:147019119:+@chrX:147019618:147019680:+@chrX:147022095:147022181:+	0.45	0.33	0.7	0.62	0.39	0.26	0.36	0.39	0.0397558	0.283427	0.45792	0.0332661	0.0292708	0.3906	0.6635	0.3305	0.3825	-0.2729	0.0601	0.0081	0.333	0.281	0.2729	0.0601	0.0081	0.333	0.281	TRUE	FALSE	FALSE	TRUE	TRUE	TRUE	TRUE	TRUE	TRUE	TRUE	TRUE	TRUE	TRUE
SE	ENSG00000101966	XIAP	chrX:122994017:122994143:+@chrX:123019481:123020389:+@chrX:123022469:123022568:+	0.84	0.86	0.79	0.78	0.69	0.78	0.8	0.68	0.0289989	0.118891	0.16376	0.240936	0.307842	0.8506	0.7885	0.7405	0.7475	0.0621	0.1101	0.1031	0.048	0.041	0.0621	0.1101	0.1031	0.048	0.041	TRUE	FALSE	FALSE	FALSE	FALSE	TRUE	FALSE	TRUE	TRUE	TRUE	TRUE	TRUE	TRUE
SE	ENSG00000130021	HDHD1	chrX:7023661:7023879:-@chrX:6995261:6995490:-@chrX:6966961:6968513:-	0.91	0.89	0.98	0.96	0.78	0.85	0.96	0.95	0.0179857	0.122798	0.0344315	0.0629655	0.220237	0.9006	0.9735	0.8205	0.9625	-0.0729	0.0801	-0.0619	0.153	0.011	0.0729	0.0801	0.0619	0.153	0.011	TRUE	FALSE	TRUE	FALSE	FALSE	TRUE	FALSE	FALSE	TRUE	FALSE	TRUE	TRUE	FALSE
SE	NA	NA	chrX:100243182:100243272:+@chrX:100243367:100243373:+@chrX:100245551:100245820:+	0.54	0.59	0.31	0.28	0.43	0.34	0.48	0.33	0.0105766	0.0526291	0.132793	0.13222	0.180716	0.5656	0.2985	0.3905	0.4125	0.2671	0.1751	0.1531	-0.092	-0.114	0.2671	0.1751	0.1531	0.092	0.114	TRUE	FALSE	FALSE	FALSE	FALSE	TRUE	FALSE	TRUE	TRUE	TRUE	TRUE	TRUE	TRUE
SE	ENSG00000147130	ZMYM3	chrX:70462820:70462934:-@chrX:70462020:70462274:-@chrX:70461077:70461194:-	0.9	0.88	0.79	0.75	0.75	0.72	0.85	0.76	0.0291018	0.00920196	0.159201	0.158307	0.268819	0.8906	0.7735	0.7405	0.8125	0.1171	0.1501	0.0781	0.033	-0.039	0.1171	0.1501	0.0781	0.033	0.039	TRUE	TRUE	FALSE	FALSE	FALSE	TRUE	FALSE	FALSE	TRUE	FALSE	TRUE	FALSE	TRUE
SE	ENSG00000102172	SMS	chrX:21985314:21985434:+@chrX:21990015:21990108:+@chrX:21990625:21990689:+	0.72	0.73	0.78	0.78	0.68	0.77	0.77	0.75	0.0240241	0.465891	0.0479754	0.225801	0.170242	0.7256	0.7835	0.7305	0.7675	-0.0579	-0.0049	-0.0419	0.053	0.016	0.0579	0.0049	0.0419	0.053	0.016	TRUE	FALSE	FALSE	FALSE	FALSE	TRUE	FALSE	TRUE	TRUE	TRUE	TRUE	TRUE	TRUE
SE	ENSG00000125962	ARMCX5	chrX:101854640:101854775:+@chrX:101855848:101855960:+@chrX:101856392:101856437:+	0.59	0.55	0.71	0.66	0.55	0.49	0.66	0.53	0.0346398	0.174345	0.354353	0.0270911	0.196794	0.5706	0.6885	0.5255	0.6025	-0.1179	0.0451	-0.0319	0.163	0.086	0.1179	0.0451	0.0319	0.163	0.086	TRUE	FALSE	FALSE	TRUE	FALSE	TRUE	TRUE	TRUE	TRUE	TRUE	TRUE	TRUE	TRUE
SE	ENSG00000047634	SCML1	chrX:17755592:17755800:+@chrX:17762191:17762339:+@chrX:17763576:17763659:+	0.19	0.21	0.49	0.41	0.53	0.48	0.33	0.58	0.0419406	0.0139917	0.141469	0.182565	0.477538	0.2006	0.4535	0.5105	0.4625	-0.2529	-0.3099	-0.2619	-0.057	-0.009	0.2529	0.3099	0.2619	0.057	0.009	TRUE	TRUE	FALSE	FALSE	FALSE	TRUE	FALSE	FALSE	TRUE	FALSE	TRUE	FALSE	TRUE
SE	ENSG00000085185	BCORL1	chrX:129162610:129162836:+@chrX:129168430:129168651:+@chrX:129171342:129171508:+	0.91	0.94	0.85	0.81	0.88	0.89	0.93	0.87	0.0356459	0.110282	0.327273	0.094558	0.0953374	0.9256	0.8335	0.8905	0.9075	0.0921	0.0351	0.0181	-0.057	-0.074	0.0921	0.0351	0.0181	0.057	0.074	TRUE	FALSE	FALSE	FALSE	FALSE	TRUE	FALSE	TRUE	TRUE	TRUE	TRUE	TRUE	TRUE
SE	ENSG00000114346	ECT2	chr3:172468749:172468906:+@chr3:172469940:172470262:+@chr3:172472299:172472450:+	0.6	0.6	0.4	0.39	0.7	0.5	0.79	0.51	0.00672063	0.484337	0.376723	0.142353	0.157135	0.6006	0.3985	0.6055	0.6575	0.2021	-0.0049	-0.0569	-0.207	-0.259	0.2021	0.0049	0.0569	0.207	0.259	TRUE	FALSE	FALSE	FALSE	FALSE	TRUE	FALSE	TRUE	TRUE	TRUE	TRUE	TRUE	TRUE
SE	ENSG00000183624	C3orf37	chr3:128998553:128998758:+@chr3:129007697:129007840:+@chr3:129017197:129017378:+	0.63	0.65	0.81	0.78	0.79	0.76	0.64	0.76	0.00913365	0.0112281	0.23254	0.236319	0.181781	0.6406	0.7985	0.7805	0.7075	-0.1579	-0.1399	-0.0669	0.018	0.091	0.1579	0.1399	0.0669	0.018	0.091	TRUE	TRUE	FALSE	FALSE	FALSE	TRUE	FALSE	FALSE	TRUE	FALSE	TRUE	FALSE	TRUE
SE	ENSG00000156976	EIF4A2	chr3:186505592:186505671:+@chr3:186506099:186506209:+@chr3:186506914:186507685:+	0.17	0.16	0.22	0.23	0.31	0.3	0.22	0.27	0.00735035	0.00136271	0.0844673	0.00425899	0.257886	0.1656	0.2285	0.3105	0.2525	-0.0629	-0.1449	-0.0869	-0.082	-0.024	0.0629	0.1449	0.0869	0.082	0.024	TRUE	TRUE	FALSE	TRUE	FALSE	TRUE	TRUE	FALSE	TRUE	FALSE	TRUE	FALSE	TRUE
SE	ENSG00000187118	CMC1	chr3:28283124:28283303:+@chr3:28304782:28304871:+@chr3:28357824:28357914:+	0.3	0.3	0.41	0.45	0.32	0.33	0.37	0.4	0.0486621	0.0571295	0.0530898	0.0531445	0.130322	0.3006	0.4335	0.3305	0.3925	-0.1329	-0.0299	-0.0919	0.103	0.041	0.1329	0.0299	0.0919	0.103	0.041	TRUE	FALSE	FALSE	FALSE	FALSE	TRUE	FALSE	TRUE	TRUE	TRUE	TRUE	TRUE	TRUE
SE	ENSG00000093167	LRRFIP2	chr3:37216030:37216096:-@chr3:37196105:37196147:-@chr3:37190385:37190529:-	0.1	0.17	0.31	0.27	0.16	0.2	0.2	0.18	0.0420433	0.182116	0.154683	0.0312659	0.0411303	0.1356	0.2935	0.1855	0.1975	-0.1579	-0.0499	-0.0619	0.108	0.096	0.1579	0.0499	0.0619	0.108	0.096	TRUE	FALSE	FALSE	TRUE	TRUE	TRUE	TRUE	TRUE	TRUE	TRUE	TRUE	TRUE	TRUE
SE	ENSG00000152492	CCDC50	chr3:191087708:191087825:+@chr3:191092851:191093378:+@chr3:191097948:191098063:+	0.05	0.03	0.14	0.19	0.09	0.03	0.1	0.02	0.0445772	0.274782	0.309041	0.060473	0.0929511	0.0406	0.1685	0.0655	0.0675	-0.1279	-0.0249	-0.0269	0.103	0.101	0.1279	0.0249	0.0269	0.103	0.101	TRUE	FALSE	FALSE	FALSE	FALSE	TRUE	FALSE	TRUE	TRUE	TRUE	TRUE	TRUE	TRUE
SE	ENSG00000172936	MYD88	chr3:38181355:38181489:+@chr3:38181879:38182059:+@chr3:38182248:38182339:+	0.85	0.8	0.66	0.72	0.76	0.78	0.77	0.77	0.0415978	0.134418	0.154602	0.0993898	0.110825	0.8256	0.6935	0.7755	0.7775	0.1321	0.0501	0.0481	-0.082	-0.084	0.1321	0.0501	0.0481	0.082	0.084	TRUE	FALSE	FALSE	FALSE	FALSE	TRUE	FALSE	TRUE	TRUE	TRUE	TRUE	TRUE	TRUE
SE	NA	NA	chr3:194309754:194309871:+@chr3:194310203:194310355:+@chr3:194310584:194311561:+	0.89	0.9	0.7	0.72	0.82	0.81	0.73	0.85	0.00803756	0.00363752	0.175282	0.0169545	0.196148	0.8956	0.7135	0.8205	0.7975	0.1821	0.0751	0.0981	-0.107	-0.084	0.1821	0.0751	0.0981	0.107	0.084	TRUE	TRUE	FALSE	TRUE	FALSE	TRUE	TRUE	FALSE	TRUE	FALSE	TRUE	FALSE	TRUE
SE	ENSG00000158186	MRAS	chr3:138067692:138067874:+@chr3:138091708:138091918:+@chr3:138116166:138116319:+	0.87	0.85	0.76	0.72	0.77	0.8	0.79	0.82	0.0291018	0.0393244	0.0704088	0.103117	0.0577162	0.8606	0.7435	0.7905	0.8125	0.1171	0.0701	0.0481	-0.047	-0.069	0.1171	0.0701	0.0481	0.047	0.069	TRUE	TRUE	FALSE	FALSE	FALSE	TRUE	FALSE	FALSE	TRUE	FALSE	TRUE	FALSE	TRUE
SE	ENSG00000157036	EXOG	chr3:38537763:38538021:+@chr3:38539120:38539175:+@chr3:38542846:38542985:+	0.55	0.48	0.86	0.75	0.89	0.65	0.72	0.75	0.0301972	0.127223	0.0309451	0.416753	0.215048	0.5156	0.8085	0.7755	0.7425	-0.2929	-0.2599	-0.2269	0.033	0.066	0.2929	0.2599	0.2269	0.033	0.066	TRUE	FALSE	TRUE	FALSE	FALSE	TRUE	FALSE	FALSE	TRUE	FALSE	TRUE	TRUE	FALSE
SE	ENSG00000225697	SLC26A6	chr3:48667075:48667144:-@chr3:48666055:48666147:-@chr3:48665867:48665974:-	0.55	0.53	0.62	0.65	0.53	0.65	0.65	0.57	0.022725	0.264335	0.143459	0.302504	0.345626	0.5406	0.6385	0.5955	0.6175	-0.0979	-0.0549	-0.0769	0.043	0.021	0.0979	0.0549	0.0769	0.043	0.021	TRUE	FALSE	FALSE	FALSE	FALSE	TRUE	FALSE	TRUE	TRUE	TRUE	TRUE	TRUE	TRUE
SE	ENSG00000075651	PLD1	chr3:171406466:171406666:-@chr3:171405161:171405374:-@chr3:171395356:171395484:-	0.93	0.91	0.82	0.84	0.79	0.92	0.8	0.81	0.0138045	0.262693	0.0129749	0.375644	0.128648	0.9206	0.8335	0.8605	0.8125	0.0871	0.0601	0.1081	-0.027	0.021	0.0871	0.0601	0.1081	0.027	0.021	TRUE	FALSE	TRUE	FALSE	FALSE	TRUE	FALSE	FALSE	TRUE	FALSE	TRUE	TRUE	FALSE
SE	ENSG00000114098	ARMC8	chr3:137906148:137906441:+@chr3:137928659:137928735:+@chr3:137940768:137940839:+	0.4	0.42	0.56	0.53	0.52	0.33	0.63	0.47	0.0115066	0.433996	0.156165	0.213215	0.464259	0.4106	0.5485	0.4305	0.5575	-0.1379	-0.0199	-0.1469	0.118	-0.009	0.1379	0.0199	0.1469	0.118	0.009	TRUE	FALSE	FALSE	FALSE	FALSE	TRUE	FALSE	TRUE	TRUE	TRUE	TRUE	TRUE	TRUE
SE	ENSG00000017260	ATP2C1	chr3:130612835:130613181:+@chr3:130613434:130613619:+@chr3:130649260:130649370:+	0.33	0.32	0.39	0.38	0.35	0.42	0.23	0.27	0.00676598	0.156652	0.0836687	0.48212	0.0432502	0.3256	0.3885	0.3905	0.2575	-0.0629	-0.0649	0.0681	-0.002	0.131	0.0629	0.0649	0.0681	0.002	0.131	TRUE	FALSE	FALSE	FALSE	TRUE	TRUE	TRUE	TRUE	TRUE	TRUE	TRUE	TRUE	TRUE
SE	ENSG00000114796	KLHL24	chr3:183361268:183361330:+@chr3:183361874:183361955:+@chr3:183368084:183369064:+	0.06	0.04	0.16	0.18	0.28	0.14	0.12	0.14	0.0070788	0.123914	0.0138655	0.326781	0.0681105	0.0506	0.1735	0.2155	0.1375	-0.1229	-0.1649	-0.0869	-0.042	0.036	0.1229	0.1649	0.0869	0.042	0.036	TRUE	FALSE	TRUE	FALSE	FALSE	TRUE	FALSE	FALSE	TRUE	FALSE	TRUE	TRUE	FALSE
SE	ENSG00000114626	ABTB1	chr3:127396519:127396686:+@chr3:127398416:127398522:+@chr3:127398828:127399028:+	0.06	0.06	0.14	0.15	0.09	0.06	0.11	0.07	0.0194076	0.200369	0.154694	0.0503181	0.106209	0.0606	0.1485	0.0805	0.0975	-0.0879	-0.0199	-0.0369	0.068	0.051	0.0879	0.0199	0.0369	0.068	0.051	TRUE	FALSE	FALSE	FALSE	FALSE	TRUE	FALSE	TRUE	TRUE	TRUE	TRUE	TRUE	TRUE
SE	ENSG00000144681	STAC	chr3:36422097:36422246:+@chr3:36484856:36485132:+@chr3:36524484:36524584:+	0.87	0.85	0.9	0.92	0.8	0.86	0.88	0.86	0.0349832	0.278975	0.176959	0.104949	0.0636629	0.8606	0.9135	0.8355	0.8775	-0.0529	0.0251	-0.0169	0.078	0.036	0.0529	0.0251	0.0169	0.078	0.036	TRUE	FALSE	FALSE	FALSE	FALSE	TRUE	FALSE	TRUE	TRUE	TRUE	TRUE	TRUE	TRUE
SE	NA	NA	chr3:185692955:185693145:+@chr3:185693802:185693958:+@chr3:185697447:185698665:+	0.16	0.2	0.28	0.3	0.47	0.37	0.34	0.49	0.0308331	0.0460846	0.0871638	0.108075	0.166428	0.1806	0.2935	0.4255	0.4225	-0.1129	-0.2449	-0.2419	-0.132	-0.129	0.1129	0.2449	0.2419	0.132	0.129	TRUE	TRUE	FALSE	FALSE	FALSE	TRUE	FALSE	FALSE	TRUE	FALSE	TRUE	FALSE	TRUE
SE	ENSG00000173402	DAG1	chr3:49507565:49507707:+@chr3:49514282:49514333:+@chr3:49547852:49548252:+	0.09	0.04	0.19	0.25	0.17	0.08	0.28	0.12	0.0304457	0.179845	0.152979	0.121404	0.438087	0.0656	0.2235	0.1305	0.2075	-0.1579	-0.0649	-0.1419	0.093	0.016	0.1579	0.0649	0.1419	0.093	0.016	TRUE	FALSE	FALSE	FALSE	FALSE	TRUE	FALSE	TRUE	TRUE	TRUE	TRUE	TRUE	TRUE
SE	ENSG00000118007	STAG1	chr3:136062674:136062848:-@chr3:136060283:136060393:-@chr3:136059333:136059447:-	0.74	0.8	0.88	0.91	0.85	0.69	0.88	0.87	0.0473218	0.480829	0.0788736	0.179055	0.241552	0.7706	0.8985	0.7755	0.8825	-0.1279	-0.0049	-0.1119	0.123	0.016	0.1279	0.0049	0.1119	0.123	0.016	TRUE	FALSE	FALSE	FALSE	FALSE	TRUE	FALSE	TRUE	TRUE	TRUE	TRUE	TRUE	TRUE
SE	ENSG00000145016	KIAA0226	chr3:197427484:197428017:-@chr3:197426058:197426102:-@chr3:197423825:197423920:-	0.07	0.09	0.13	0.15	0.09	0.1	0.09	0.12	0.0241171	0.122473	0.123212	0.0510135	0.128109	0.0806	0.1435	0.1005	0.1125	-0.0629	-0.0199	-0.0319	0.043	0.031	0.0629	0.0199	0.0319	0.043	0.031	TRUE	FALSE	FALSE	FALSE	FALSE	TRUE	FALSE	TRUE	TRUE	TRUE	TRUE	TRUE	TRUE
SE	ENSG00000114346	ECT2	chr3:172468749:172468906:+@chr3:172469940:172470226:+@chr3:172472299:172472450:+	0.59	0.52	0.36	0.32	0.63	0.48	0.75	0.33	0.0284784	0.47992	0.487743	0.0961531	0.253816	0.5556	0.3435	0.5605	0.5475	0.2121	-0.0049	0.0081	-0.217	-0.204	0.2121	0.0049	0.0081	0.217	0.204	TRUE	FALSE	FALSE	FALSE	FALSE	TRUE	FALSE	TRUE	TRUE	TRUE	TRUE	TRUE	TRUE
SE	ENSG00000182923	CEP63	chr3:134205047:134205398:+@chr3:134206861:134206932:+@chr3:134214138:134214206:+	0.08	0.09	0.16	0.14	0.21	0.11	0.09	0.11	0.0245548	0.175631	0.125546	0.424554	0.0421033	0.0856	0.1535	0.1655	0.1075	-0.0679	-0.0799	-0.0219	-0.012	0.046	0.0679	0.0799	0.0219	0.012	0.046	TRUE	FALSE	FALSE	FALSE	FALSE	TRUE	FALSE	TRUE	TRUE	TRUE	TRUE	TRUE	TRUE
SE	ENSG00000163832	C3orf75	chr3:47552638:47552716:-@chr3:47551674:47551744:-@chr3:47545820:47545938:-	0.83	0.82	0.69	0.68	0.8	0.72	0.75	0.73	0.0015163	0.18326	0.0170932	0.149262	0.0304268	0.8256	0.6885	0.7655	0.7475	0.1371	0.0601	0.0781	-0.077	-0.059	0.1371	0.0601	0.0781	0.077	0.059	TRUE	FALSE	TRUE	FALSE	TRUE	TRUE	TRUE	FALSE	TRUE	FALSE	TRUE	TRUE	FALSE
SE	ENSG00000214135	AC024560.3	chr3:197350091:197350253:-@chr3:197349058:197349201:-@chr3:197348575:197348739:-	0.44	0.53	0.26	0.13	0.33	0.4	0.71	0.38	0.0399743	0.0936467	0.377565	0.0897877	0.123473	0.4856	0.1985	0.3705	0.5525	0.2871	0.1151	-0.0669	-0.172	-0.354	0.2871	0.1151	0.0669	0.172	0.354	TRUE	FALSE	FALSE	FALSE	FALSE	TRUE	FALSE	TRUE	TRUE	TRUE	TRUE	TRUE	TRUE
SE	ENSG00000156976	EIF4A2	chr3:186505592:186505671:+@chr3:186506099:186506205:+@chr3:186506914:186507685:+	0.11	0.12	0.21	0.22	0.26	0.3	0.2	0.27	0.00272545	0.0324378	0.0842963	0.0848219	0.310425	0.1156	0.2185	0.2855	0.2425	-0.1029	-0.1699	-0.1269	-0.067	-0.024	0.1029	0.1699	0.1269	0.067	0.024	TRUE	TRUE	FALSE	FALSE	FALSE	TRUE	FALSE	FALSE	TRUE	FALSE	TRUE	FALSE	TRUE
SE	ENSG00000188313	PLSCR1	chr3:146243392:146243434:-@chr3:146239331:146239840:-@chr3:146234793:146234954:-	0.75	0.77	0.64	0.66	0.7	0.59	0.66	0.71	0.00878851	0.142513	0.0981551	0.482578	0.173336	0.7606	0.6535	0.6505	0.6925	0.1071	0.1101	0.0681	0.003	-0.039	0.1071	0.1101	0.0681	0.003	0.039	TRUE	FALSE	FALSE	FALSE	FALSE	TRUE	FALSE	TRUE	TRUE	TRUE	TRUE	TRUE	TRUE
SE	ENSG00000090097	PCBP4	chr3:51994205:51994336:-@chr3:51993911:51994039:-@chr3:51993593:51993667:-	0.79	0.76	0.59	0.63	0.73	0.74	0.77	0.76	0.0144409	0.117939	0.437423	0.0420901	0.0350914	0.7756	0.6135	0.7405	0.7725	0.1621	0.0351	0.0031	-0.127	-0.159	0.1621	0.0351	0.0031	0.127	0.159	TRUE	FALSE	FALSE	TRUE	TRUE	TRUE	TRUE	TRUE	TRUE	TRUE	TRUE	TRUE	TRUE
SE	ENSG00000136521	NDUFB5	chr3:179333771:179333837:+@chr3:179334771:179334832:+@chr3:179336203:179336309:+	0.72	0.65	0.55	0.51	0.67	0.63	0.67	0.54	0.0464641	0.276248	0.224911	0.0237426	0.21275	0.6856	0.5335	0.6555	0.6125	0.1521	0.0301	0.0731	-0.122	-0.079	0.1521	0.0301	0.0731	0.122	0.079	TRUE	FALSE	FALSE	TRUE	FALSE	TRUE	TRUE	TRUE	TRUE	TRUE	TRUE	TRUE	TRUE
SE	ENSG00000075975	MKRN2	chr3:12598513:12598675:+@chr3:12610374:12610502:+@chr3:12611570:12611751:+	0.9	0.87	0.77	0.75	0.84	0.85	0.82	0.83	0.0166871	0.117939	0.0743587	0.0141579	0.0203547	0.8856	0.7635	0.8505	0.8325	0.1221	0.0351	0.0531	-0.087	-0.069	0.1221	0.0351	0.0531	0.087	0.069	TRUE	FALSE	FALSE	TRUE	TRUE	TRUE	TRUE	TRUE	TRUE	TRUE	TRUE	TRUE	TRUE
SE	ENSG00000073792	IGF2BP2	chr3:185414400:185414451:-@chr3:185410487:185410568:-@chr3:185407143:185407415:-	0.55	0.55	0.34	0.32	0.71	0.81	0.73	0.6	0.013788	0.0734579	0.154908	0.0328954	0.0567489	0.5506	0.3335	0.7655	0.6725	0.2171	-0.2149	-0.1219	-0.432	-0.339	0.2171	0.2149	0.1219	0.432	0.339	TRUE	FALSE	FALSE	TRUE	FALSE	TRUE	TRUE	TRUE	TRUE	TRUE	TRUE	TRUE	TRUE
SE	ENSG00000114796	KLHL24	chr3:183353411:183353581:+@chr3:183368084:183369064:+@chr3:183381246:183381430:+	0.91	0.91	0.8	0.8	0.75	0.86	0.84	0.87	2.69828e-05	0.161138	0.099127	0.460064	0.0816142	0.9106	0.8035	0.8105	0.8625	0.1071	0.1001	0.0481	-0.007	-0.059	0.1071	0.1001	0.0481	0.007	0.059	TRUE	FALSE	FALSE	FALSE	FALSE	TRUE	FALSE	TRUE	TRUE	TRUE	TRUE	TRUE	TRUE
SE	ENSG00000163608	C3orf17	chr3:112732796:112732879:-@chr3:112729892:112730253:-@chr3:112727018:112727277:-	0.56	0.54	0.72	0.76	0.63	0.62	0.37	0.65	0.0157889	0.0245283	0.426386	0.0506801	0.174857	0.5506	0.7435	0.6305	0.5175	-0.1929	-0.0799	0.0331	0.113	0.226	0.1929	0.0799	0.0331	0.113	0.226	TRUE	TRUE	FALSE	FALSE	FALSE	TRUE	FALSE	FALSE	TRUE	FALSE	TRUE	FALSE	TRUE
SE	ENSG00000176095	IP6K1	chr3:49823787:49823973:-@chr3:49785251:49785601:-@chr3:49775645:49775855:-	0.67	0.71	0.57	0.56	0.46	0.55	0.56	0.54	0.0439308	0.0585934	0.026367	0.21097	0.220237	0.6906	0.5685	0.5105	0.5575	0.1221	0.1801	0.1331	0.058	0.011	0.1221	0.1801	0.1331	0.058	0.011	TRUE	FALSE	TRUE	FALSE	FALSE	TRUE	FALSE	FALSE	TRUE	FALSE	TRUE	TRUE	FALSE
SE	ENSG00000114796	KLHL24	chr3:183353411:183353535:+@chr3:183354009:183354099:+@chr3:183368084:183369064:+	0.12	0.11	0.22	0.21	0.37	0.18	0.24	0.29	0.00263602	0.165265	0.045438	0.315141	0.136505	0.1156	0.2185	0.2805	0.2725	-0.1029	-0.1649	-0.1569	-0.062	-0.054	0.1029	0.1649	0.1569	0.062	0.054	TRUE	FALSE	TRUE	FALSE	FALSE	TRUE	FALSE	FALSE	TRUE	FALSE	TRUE	TRUE	FALSE
SE	ENSG00000055955,ENSG00000243696	ITIH4,MUSTN1	chr3:52852273:52852299:-@chr3:52852068:52852226:-@chr3:52850900:52851074:-	0.42	0.38	0.64	0.57	0.52	0.53	0.6	0.19	0.0267507	0.0407422	0.497046	0.129192	0.247471	0.4006	0.6085	0.5305	0.4025	-0.2079	-0.1299	-0.0019	0.078	0.206	0.2079	0.1299	0.0019	0.078	0.206	TRUE	TRUE	FALSE	FALSE	FALSE	TRUE	FALSE	FALSE	TRUE	FALSE	TRUE	FALSE	TRUE
SE	ENSG00000145014	TMEM44	chr3:194343953:194344039:-@chr3:194338365:194338505:-@chr3:194337828:194337998:-	0.17	0.13	0.4	0.34	0.19	0.04	0.28	0.1	0.0164376	0.378314	0.346373	0.0731727	0.138795	0.1506	0.3735	0.1205	0.1975	-0.2229	0.0301	-0.0469	0.253	0.176	0.2229	0.0301	0.0469	0.253	0.176	TRUE	FALSE	FALSE	FALSE	FALSE	TRUE	FALSE	TRUE	TRUE	TRUE	TRUE	TRUE	TRUE
SE	ENSG00000163702	IL17RC	chr3:9959607:9959759:+@chr3:9960019:9960093:+@chr3:9960184:9960293:+	0.77	0.8	0.65	0.68	0.71	0.79	0.57	0.83	0.0158797	0.29557	0.328226	0.124184	0.407648	0.7856	0.6685	0.7555	0.7075	0.1171	0.0301	0.0781	-0.087	-0.039	0.1171	0.0301	0.0781	0.087	0.039	TRUE	FALSE	FALSE	FALSE	FALSE	TRUE	FALSE	TRUE	TRUE	TRUE	TRUE	TRUE	TRUE
SE	ENSG00000188313	PLSCR1	chr3:146243392:146243434:-@chr3:146239620:146239840:-@chr3:146239331:146239492:-	0.83	0.83	0.72	0.73	0.72	0.76	0.78	0.76	0.0166877	0.0751861	0.056092	0.278004	0.0344664	0.8306	0.7285	0.7455	0.7775	0.1021	0.0851	0.0531	-0.017	-0.049	0.1021	0.0851	0.0531	0.017	0.049	TRUE	FALSE	FALSE	FALSE	FALSE	TRUE	FALSE	TRUE	TRUE	TRUE	TRUE	TRUE	TRUE
SE	ENSG00000174640	SLCO2A1	chr3:133692507:133692669:-@chr3:133673810:133674037:-@chr3:133672507:133672605:-	0.54	0.57	0.72	0.68	0.61	0.59	0.75	0.7	0.0155842	0.0612681	0.0200132	0.039977	0.228169	0.5556	0.7035	0.6055	0.7325	-0.1479	-0.0499	-0.1769	0.098	-0.029	0.1479	0.0499	0.1769	0.098	0.029	TRUE	FALSE	TRUE	TRUE	FALSE	TRUE	TRUE	FALSE	TRUE	FALSE	TRUE	TRUE	FALSE
SE	ENSG00000163660	CCNL1	chr3:156869518:156869719:-@chr3:156869275:156869380:-@chr3:156868071:156868170:-	0.4	0.36	0.18	0.21	0.28	0.17	0.31	0.32	0.0115349	0.0949359	0.0979434	0.330911	0.0271079	0.3806	0.1985	0.2305	0.3225	0.1821	0.1501	0.0581	-0.032	-0.124	0.1821	0.1501	0.0581	0.032	0.124	TRUE	FALSE	FALSE	FALSE	TRUE	TRUE	TRUE	TRUE	TRUE	TRUE	TRUE	TRUE	TRUE
SE	ENSG00000073711	PPP2R3A	chr3:135684515:135684691:+@chr3:135719901:135722335:+@chr3:135745674:135745940:+	0.89	0.91	0.76	0.78	0.72	0.84	0.83	0.8	0.00630334	0.151055	0.0297916	0.437863	0.0616118	0.9006	0.7735	0.7855	0.8225	0.1271	0.1151	0.0781	-0.012	-0.049	0.1271	0.1151	0.0781	0.012	0.049	TRUE	FALSE	TRUE	FALSE	FALSE	TRUE	FALSE	FALSE	TRUE	FALSE	TRUE	TRUE	FALSE
SE	ENSG00000114867,ENSG00000145191	EIF4G1,EIF2B5	chr3:184032283:184032462:+@chr3:184033277:184033333:+@chr3:184035109:184035285:+	0.14	0.12	0.21	0.22	0.16	0.13	0.17	0.14	0.0176772	0.195385	0.114236	0.0503181	0.0636954	0.1306	0.2185	0.1505	0.1625	-0.0879	-0.0199	-0.0319	0.068	0.056	0.0879	0.0199	0.0319	0.068	0.056	TRUE	FALSE	FALSE	FALSE	FALSE	TRUE	FALSE	TRUE	TRUE	TRUE	TRUE	TRUE	TRUE
SE	ENSG00000114473	IQCG	chr3:197619499:197619630:-@chr3:197618317:197618418:-@chr3:197615946:197616585:-	0.87	0.87	0.78	0.75	0.63	0.78	0.7	0.79	0.0448012	0.140261	0.117044	0.290693	0.393318	0.8706	0.7685	0.7105	0.7525	0.1021	0.1601	0.1181	0.058	0.016	0.1021	0.1601	0.1181	0.058	0.016	TRUE	FALSE	FALSE	FALSE	FALSE	TRUE	FALSE	TRUE	TRUE	TRUE	TRUE	TRUE	TRUE
SE	ENSG00000144554	FANCD2	chr3:10130512:10130634:+@chr3:10131976:10132069:+@chr3:10133865:10133936:+	0.78	0.76	0.7	0.67	0.61	0.75	0.8	0.79	0.0264541	0.218703	0.0803656	0.486536	0.0300264	0.7706	0.6885	0.6855	0.8025	0.0821	0.0851	-0.0319	0.003	-0.114	0.0821	0.0851	0.0319	0.003	0.114	TRUE	FALSE	FALSE	FALSE	TRUE	TRUE	TRUE	TRUE	TRUE	TRUE	TRUE	TRUE	TRUE
SE	ENSG00000114126	TFDP2	chr3:141713862:141713983:-@chr3:141712380:141712427:-@chr3:141697362:141697524:-	0.88	0.91	0.81	0.8	0.91	0.89	0.89	0.9	0.041579	0.317582	0.360741	0.0151769	0.00328261	0.8956	0.8085	0.9055	0.9025	0.0871	-0.0099	-0.0069	-0.097	-0.094	0.0871	0.0099	0.0069	0.097	0.094	TRUE	FALSE	FALSE	TRUE	TRUE	TRUE	TRUE	TRUE	TRUE	TRUE	TRUE	TRUE	TRUE
SE	ENSG00000151276	MAGI1	chr3:65376817:65377033:-@chr3:65372818:65372901:-@chr3:65369207:65369298:-	0.09	0.14	0.34	0.25	0.38	0.18	0.07	0.23	0.0494445	0.162575	0.347596	0.460003	0.148742	0.1156	0.2985	0.2855	0.1575	-0.1829	-0.1699	-0.0419	0.013	0.141	0.1829	0.1699	0.0419	0.013	0.141	TRUE	FALSE	FALSE	FALSE	FALSE	TRUE	FALSE	TRUE	TRUE	TRUE	TRUE	TRUE	TRUE
SE	ENSG00000169814	BTD	chr3:15671509:15671627:+@chr3:15672934:15673002:+@chr3:15676931:15677195:+	0.12	0.12	0.07	0.06	0.12	0.05	0.06	0.06	0.0265701	0.271642	0.000102896	0.319104	0.430471	0.1206	0.0685	0.0905	0.0675	0.0521	0.0301	0.0531	-0.022	0.001	0.0521	0.0301	0.0531	0.022	0.001	TRUE	FALSE	TRUE	FALSE	FALSE	TRUE	FALSE	FALSE	TRUE	FALSE	TRUE	TRUE	FALSE
SE	ENSG00000177311	ZBTB38	chr3:141105714:141105779:+@chr3:141106283:141106729:+@chr3:141122769:141122873:+	0.59	0.53	0.19	0.18	0.5	0.5	0.24	0.36	0.0237247	0.160448	0.0505703	0.0041138	0.149014	0.5606	0.1885	0.5055	0.3075	0.3721	0.0551	0.2531	-0.317	-0.119	0.3721	0.0551	0.2531	0.317	0.119	TRUE	FALSE	FALSE	TRUE	FALSE	TRUE	TRUE	TRUE	TRUE	TRUE	TRUE	TRUE	TRUE
SE	ENSG00000177311	ZBTB38	chr3:141105714:141105779:+@chr3:141115101:141115345:+@chr3:141122769:141122873:+	0.65	0.61	0.23	0.27	0.46	0.61	0.23	0.46	0.00291545	0.2178	0.121097	0.0719342	0.273444	0.6306	0.2535	0.5405	0.3525	0.3771	0.0901	0.2781	-0.287	-0.099	0.3771	0.0901	0.2781	0.287	0.099	TRUE	FALSE	FALSE	FALSE	FALSE	TRUE	FALSE	TRUE	TRUE	TRUE	TRUE	TRUE	TRUE
SE	ENSG00000114423	CBLB	chr3:105400568:105400662:-@chr3:105400323:105400454:-@chr3:105397275:105397415:-	0.63	0.61	0.4	0.45	0.73	0.6	0.67	0.59	0.0264166	0.289788	0.371737	0.0649103	0.0310683	0.6206	0.4285	0.6705	0.6375	0.1921	-0.0499	-0.0169	-0.242	-0.209	0.1921	0.0499	0.0169	0.242	0.209	TRUE	FALSE	FALSE	FALSE	TRUE	TRUE	TRUE	TRUE	TRUE	TRUE	TRUE	TRUE	TRUE
SE	ENSG00000068885,ENSG00000248710	IFT80,RP11-432B6.3	chr3:160116934:160117320:-@chr3:160109334:160109431:-@chr3:160102352:160102434:-	0.18	0.18	0.07	0.07	0.15	0.1	0.08	0.13	2.69828e-05	0.144741	0.11401	0.129159	0.184286	0.1806	0.0735	0.1305	0.1125	0.1071	0.0501	0.0681	-0.057	-0.039	0.1071	0.0501	0.0681	0.057	0.039	TRUE	FALSE	FALSE	FALSE	FALSE	TRUE	FALSE	TRUE	TRUE	TRUE	TRUE	TRUE	TRUE
SE	ENSG00000114026	OGG1	chr3:9798451:9798500:+@chr3:9800918:9800970:+@chr3:9807493:9808353:+	0.11	0.09	0.27	0.22	0.22	0.08	0.13	0.12	0.0342446	0.286606	0.0803656	0.196843	0.061449	0.1006	0.2485	0.1555	0.1325	-0.1479	-0.0549	-0.0319	0.093	0.116	0.1479	0.0549	0.0319	0.093	0.116	TRUE	FALSE	FALSE	FALSE	FALSE	TRUE	FALSE	TRUE	TRUE	TRUE	TRUE	TRUE	TRUE
SE	ENSG00000168297	PXK	chr3:58318617:58318817:+@chr3:58351601:58351651:+@chr3:58355158:58355205:+	0.63	0.68	0.83	0.84	0.53	0.84	0.61	0.71	0.0365396	0.429887	0.429067	0.257805	0.0896051	0.6556	0.8385	0.6905	0.6675	-0.1829	-0.0349	-0.0119	0.148	0.171	0.1829	0.0349	0.0119	0.148	0.171	TRUE	FALSE	FALSE	FALSE	FALSE	TRUE	FALSE	TRUE	TRUE	TRUE	TRUE	TRUE	TRUE
SE	ENSG00000251474	RPL32P3	chr3:129115883:129115983:-@chr3:129115060:129115263:-@chr3:129112478:129112638:-	0.76	0.74	0.64	0.65	0.57	0.69	0.56	0.72	0.014134	0.15057	0.209715	0.432676	0.496048	0.7506	0.6485	0.6355	0.6475	0.1021	0.1151	0.1031	0.013	0.001	0.1021	0.1151	0.1031	0.013	0.001	TRUE	FALSE	FALSE	FALSE	FALSE	TRUE	FALSE	TRUE	TRUE	TRUE	TRUE	TRUE	TRUE
SE	ENSG00000131381	ZFYVE20	chr3:15126242:15126403:-@chr3:15123874:15124115:-@chr3:15122239:15122309:-	0.82	0.81	0.75	0.77	0.75	0.81	0.82	0.81	0.0393271	0.250681	0.216328	0.300249	0.0373758	0.8156	0.7635	0.7855	0.8225	0.0521	0.0301	-0.0069	-0.022	-0.059	0.0521	0.0301	0.0069	0.022	0.059	TRUE	FALSE	FALSE	FALSE	TRUE	TRUE	TRUE	TRUE	TRUE	TRUE	TRUE	TRUE	TRUE
SE	ENSG00000160799	CCDC12	chr3:47023422:47023500:-@chr3:47018428:47018530:-@chr3:47018127:47018333:-	0.28	0.21	0.52	0.52	0.44	0.22	0.27	0.26	0.0403041	0.279389	0.292778	0.167878	0.00522533	0.2456	0.5235	0.3355	0.2725	-0.2779	-0.0899	-0.0269	0.188	0.251	0.2779	0.0899	0.0269	0.188	0.251	TRUE	FALSE	FALSE	FALSE	TRUE	TRUE	TRUE	TRUE	TRUE	TRUE	TRUE	TRUE	TRUE
SE	ENSG00000082996	RNF13	chr3:149638921:149639014:+@chr3:149677843:149677923:+@chr3:149678527:149679925:+	0.88	0.9	0.95	0.94	0.89	0.93	0.95	0.91	0.031933	0.211772	0.104467	0.172301	0.336399	0.8906	0.9485	0.9155	0.9375	-0.0579	-0.0249	-0.0469	0.033	0.011	0.0579	0.0249	0.0469	0.033	0.011	TRUE	FALSE	FALSE	FALSE	FALSE	TRUE	FALSE	TRUE	TRUE	TRUE	TRUE	TRUE	TRUE
SE	ENSG00000068885,ENSG00000248710	IFT80,RP11-432B6.3	chr3:160099291:160099506:-@chr3:160095621:160095678:-@chr3:160095218:160095328:-	0.02	0.02	0.09	0.07	0.12	0.05	0.03	0.03	0.0474675	0.145922	0.000912729	0.436848	0.0644083	0.0206	0.0835	0.0905	0.0375	-0.0629	-0.0699	-0.0169	-0.007	0.046	0.0629	0.0699	0.0169	0.007	0.046	TRUE	FALSE	FALSE	FALSE	FALSE	TRUE	FALSE	TRUE	TRUE	TRUE	TRUE	TRUE	TRUE
SE	ENSG00000163939	PBRM1	chr3:52661289:52661386:-@chr3:52658913:52658957:-@chr3:52651278:52651554:-	0.02	0.03	0.07	0.08	0.07	0.05	0.13	0.11	0.00972226	0.0512589	0.0137941	0.191296	0.0344664	0.0256	0.0785	0.0655	0.1275	-0.0529	-0.0399	-0.1019	0.013	-0.049	0.0529	0.0399	0.1019	0.013	0.049	TRUE	FALSE	TRUE	FALSE	FALSE	TRUE	FALSE	FALSE	TRUE	FALSE	TRUE	TRUE	FALSE
SE	NA	NA	chr3:151488244:151488399:+@chr3:151493483:151493552:+@chr3:151501620:151502682:+	0.51	0.41	0.2	0.17	0.24	0.37	0.41	0.3	0.0479156	0.109599	0.158959	0.15142	0.0870921	0.4606	0.1885	0.3105	0.3625	0.2721	0.1501	0.0981	-0.122	-0.174	0.2721	0.1501	0.0981	0.122	0.174	TRUE	FALSE	FALSE	FALSE	FALSE	TRUE	FALSE	TRUE	TRUE	TRUE	TRUE	TRUE	TRUE
SE	NA	NA	chr3:9731648:9731827:+@chr3:9739395:9739550:+@chr3:9743474:9744078:+	0.47	0.41	0.26	0.21	0.3	0.18	0.41	0.3	0.0193748	0.0698097	0.182824	0.463725	0.113407	0.4406	0.2385	0.2455	0.3625	0.2021	0.1951	0.0781	-0.007	-0.124	0.2021	0.1951	0.0781	0.007	0.124	TRUE	FALSE	FALSE	FALSE	FALSE	TRUE	FALSE	TRUE	TRUE	TRUE	TRUE	TRUE	TRUE
SE	ENSG00000114098	ARMC8	chr3:137958310:137958370:+@chr3:137960625:137960825:+@chr3:137963930:137964025:+	0.54	0.56	0.48	0.46	0.47	0.53	0.56	0.58	0.0146747	0.181785	0.100115	0.23851	0.00926598	0.5506	0.4735	0.5055	0.5775	0.0771	0.0451	-0.0269	-0.032	-0.104	0.0771	0.0451	0.0269	0.032	0.104	TRUE	FALSE	FALSE	FALSE	TRUE	TRUE	TRUE	TRUE	TRUE	TRUE	TRUE	TRUE	TRUE
SE	ENSG00000170364	SETMAR	chr3:4345297:4345552:+@chr3:4354582:4355445:+@chr3:4357896:4358949:+	0.77	0.82	0.54	0.58	0.56	0.61	0.69	0.47	0.0100862	0.0143279	0.14853	0.249722	0.431556	0.7956	0.5635	0.5905	0.5875	0.2321	0.2051	0.2081	-0.027	-0.024	0.2321	0.2051	0.2081	0.027	0.024	TRUE	TRUE	FALSE	FALSE	FALSE	TRUE	FALSE	FALSE	TRUE	FALSE	TRUE	FALSE	TRUE
SE	ENSG00000080822,ENSG00000080819	CLDND1,CPOX	chr3:98241386:98241910:-@chr3:98240497:98240562:-@chr3:98239977:98240286:-	0.32	0.28	0.61	0.57	0.52	0.28	0.63	0.54	0.00460968	0.269687	0.0289562	0.177592	0.493081	0.3006	0.5935	0.4055	0.5925	-0.2929	-0.1049	-0.2919	0.188	0.001	0.2929	0.1049	0.2919	0.188	0.001	TRUE	FALSE	TRUE	FALSE	FALSE	TRUE	FALSE	FALSE	TRUE	FALSE	TRUE	TRUE	FALSE
SE	ENSG00000114378	HYAL1	chr3:50339488:50340411:-@chr3:50338419:50338508:-@chr3:50337320:50338231:-	0.75	0.81	0.68	0.62	0.71	0.69	0.61	0.79	0.046618	0.107257	0.282047	0.154689	0.328813	0.7806	0.6535	0.7055	0.7075	0.1271	0.0751	0.0731	-0.052	-0.054	0.1271	0.0751	0.0731	0.052	0.054	TRUE	FALSE	FALSE	FALSE	FALSE	TRUE	FALSE	TRUE	TRUE	TRUE	TRUE	TRUE	TRUE
SE	ENSG00000114126	TFDP2	chr3:141724283:141724386:-@chr3:141713862:141713983:-@chr3:141712380:141712427:-	0.41	0.42	0.56	0.53	0.52	0.56	0.63	0.44	0.0247365	0.0433958	0.20354	0.458438	0.479874	0.4156	0.5485	0.5455	0.5425	-0.1329	-0.1299	-0.1269	0.003	0.006	0.1329	0.1299	0.1269	0.003	0.006	TRUE	TRUE	FALSE	FALSE	FALSE	TRUE	FALSE	FALSE	TRUE	FALSE	TRUE	FALSE	TRUE
SE	ENSG00000114054	PCCB	chr3:136045645:136045752:+@chr3:136045997:136046097:+@chr3:136046476:136046574:+	0.89	0.9	0.77	0.8	0.69	0.82	0.78	0.84	0.0356843	0.143049	0.115316	0.371708	0.255643	0.8956	0.7885	0.7605	0.8175	0.1071	0.1351	0.0781	0.028	-0.029	0.1071	0.1351	0.0781	0.028	0.029	TRUE	FALSE	FALSE	FALSE	FALSE	TRUE	FALSE	TRUE	TRUE	TRUE	TRUE	TRUE	TRUE
SE	ENSG00000153551	CMTM7	chr3:32483332:32483505:+@chr3:32490946:32491044:+@chr3:32493884:32493965:+	0.64	0.67	0.76	0.8	0.58	0.65	0.54	0.65	0.0224675	0.247895	0.254579	0.0411197	0.0784986	0.6556	0.7835	0.6205	0.6025	-0.1279	0.0351	0.0531	0.163	0.181	0.1279	0.0351	0.0531	0.163	0.181	TRUE	FALSE	FALSE	TRUE	FALSE	TRUE	TRUE	TRUE	TRUE	TRUE	TRUE	TRUE	TRUE
SE	ENSG00000078070	MCCC1	chr3:182817140:182817365:-@chr3:182812347:182812393:-@chr3:182790154:182790275:-	0.96	0.95	0.89	0.91	0.88	0.86	0.91	0.95	0.0393271	0.0164356	0.267816	0.0939379	0.158043	0.9556	0.9035	0.8755	0.9375	0.0521	0.0801	0.0181	0.028	-0.034	0.0521	0.0801	0.0181	0.028	0.034	TRUE	TRUE	FALSE	FALSE	FALSE	TRUE	FALSE	FALSE	TRUE	FALSE	TRUE	FALSE	TRUE
SE	NA	NA	chr3:151488244:151488399:+@chr3:151494592:151494763:+@chr3:151501620:151502682:+	0.42	0.43	0.2	0.16	0.25	0.48	0.33	0.28	0.0204357	0.358311	0.0628748	0.173219	0.029429	0.4256	0.1835	0.3705	0.3125	0.2421	0.0551	0.1131	-0.187	-0.129	0.2421	0.0551	0.1131	0.187	0.129	TRUE	FALSE	FALSE	FALSE	TRUE	TRUE	TRUE	TRUE	TRUE	TRUE	TRUE	TRUE	TRUE
SE	NA	NA	chr3:101498029:101498168:+@chr3:101498578:101498744:+@chr3:101500954:101501134:+	0.46	0.4	0.24	0.19	0.23	0.33	0.45	0.35	0.0177425	0.0798358	0.368031	0.196218	0.0576743	0.4306	0.2185	0.2855	0.4075	0.2121	0.1451	0.0231	-0.067	-0.189	0.2121	0.1451	0.0231	0.067	0.189	TRUE	FALSE	FALSE	FALSE	FALSE	TRUE	FALSE	TRUE	TRUE	TRUE	TRUE	TRUE	TRUE
SE	ENSG00000247081	RP11-318M2.2	chr8:104298066:104298135:-@chr8:104290206:104290249:-@chr8:104258522:104258912:-	0.26	0.36	0.6	0.49	0.56	0.27	0.3	0.23	0.0425032	0.291809	0.299727	0.2667	0.0336691	0.3106	0.5485	0.4205	0.2725	-0.2379	-0.1099	0.0381	0.128	0.276	0.2379	0.1099	0.0381	0.128	0.276	TRUE	FALSE	FALSE	FALSE	TRUE	TRUE	TRUE	TRUE	TRUE	TRUE	TRUE	TRUE	TRUE
SE	ENSG00000132549	VPS13B	chr8:100533127:100533238:+@chr8:100568678:100568881:+@chr8:100587886:100588012:+	0.78	0.77	0.71	0.71	0.67	0.69	0.7	0.74	0.0266803	0.0178038	0.119703	0.113864	0.309266	0.7756	0.7135	0.6855	0.7275	0.0621	0.0901	0.0481	0.028	-0.014	0.0621	0.0901	0.0481	0.028	0.014	TRUE	TRUE	FALSE	FALSE	FALSE	TRUE	FALSE	FALSE	TRUE	FALSE	TRUE	FALSE	TRUE
SE	ENSG00000064313	TAF2	chr8:120843917:120843971:-@chr8:120831586:120831746:-@chr8:120818523:120818641:-	0.61	0.62	0.57	0.55	0.6	0.65	0.63	0.63	0.0355705	0.331491	0.0641446	0.100199	0.0402784	0.6156	0.5635	0.6305	0.6375	0.0521	-0.0149	-0.0219	-0.067	-0.074	0.0521	0.0149	0.0219	0.067	0.074	TRUE	FALSE	FALSE	FALSE	TRUE	TRUE	TRUE	TRUE	TRUE	TRUE	TRUE	TRUE	TRUE
SE	NA	NA	chr8:86129615:86129731:-@chr8:86127150:86127266:-@chr8:86126288:86126860:-	0.15	0.17	0.05	0.07	0.11	0.17	0.12	0.1	0.0106174	0.354209	0.0428829	0.0993898	0.0316858	0.1606	0.0635	0.1455	0.1175	0.0971	0.0151	0.0431	-0.082	-0.054	0.0971	0.0151	0.0431	0.082	0.054	TRUE	FALSE	FALSE	FALSE	TRUE	TRUE	TRUE	TRUE	TRUE	TRUE	TRUE	TRUE	TRUE
SE	ENSG00000104497	SNX16	chr8:82751847:82752317:-@chr8:82741665:82741751:-@chr8:82736027:82736175:-	0.82	0.86	0.65	0.64	0.87	0.82	0.85	0.61	0.0267991	0.391752	0.272524	0.0343872	0.296201	0.8406	0.6485	0.8505	0.7375	0.1921	-0.0099	0.1031	-0.202	-0.089	0.1921	0.0099	0.1031	0.202	0.089	TRUE	FALSE	FALSE	TRUE	FALSE	TRUE	TRUE	TRUE	TRUE	TRUE	TRUE	TRUE	TRUE
SE	ENSG00000104447	TRPS1	chr8:116680101:116680234:-@chr8:116635828:116635985:-@chr8:116631359:116632287:-	0.41	0.44	0.52	0.52	0.27	0.41	0.51	0.71	0.0469597	0.227236	0.151029	0.120031	0.260633	0.4256	0.5235	0.3455	0.6175	-0.0979	0.0801	-0.1919	0.178	-0.094	0.0979	0.0801	0.1919	0.178	0.094	TRUE	FALSE	FALSE	FALSE	FALSE	TRUE	FALSE	TRUE	TRUE	TRUE	TRUE	TRUE	TRUE
SE	ENSG00000029534	ANK1	chr8:41525785:41526082:-@chr8:41521177:41521260:-@chr8:41510744:41513272:-	0.74	0.77	0.86	0.87	0.66	0.81	0.85	0.66	0.0271202	0.437411	0.476866	0.169035	0.231542	0.7556	0.8685	0.7405	0.7625	-0.1129	0.0151	-0.0069	0.128	0.106	0.1129	0.0151	0.0069	0.128	0.106	TRUE	FALSE	FALSE	FALSE	FALSE	TRUE	FALSE	TRUE	TRUE	TRUE	TRUE	TRUE	TRUE
SE	ENSG00000137571	SLCO5A1	chr8:70591613:70591854:-@chr8:70588844:70588908:-@chr8:70584568:70585561:-	0.9	0.89	0.76	0.77	0.68	0.78	0.7	0.73	0.00183139	0.0955335	0.0182312	0.315595	0.0884292	0.8956	0.7685	0.7355	0.7225	0.1271	0.1601	0.1731	0.033	0.046	0.1271	0.1601	0.1731	0.033	0.046	TRUE	FALSE	TRUE	FALSE	FALSE	TRUE	FALSE	FALSE	TRUE	FALSE	TRUE	TRUE	FALSE
SE	ENSG00000164808	KIAA0146	chr8:48626051:48626203:+@chr8:48639762:48639855:+@chr8:48641495:48641609:+	0.87	0.89	0.79	0.76	0.71	0.77	0.81	0.53	0.0191169	0.0581247	0.19112	0.232288	0.300301	0.8806	0.7785	0.7455	0.6775	0.1021	0.1351	0.2031	0.033	0.101	0.1021	0.1351	0.2031	0.033	0.101	TRUE	FALSE	FALSE	FALSE	FALSE	TRUE	FALSE	TRUE	TRUE	TRUE	TRUE	TRUE	TRUE
SE	ENSG00000104419	NDRG1	chr8:134292475:134292510:-@chr8:134276790:134276895:-@chr8:134274290:134274410:-	0.5	0.51	0.61	0.58	0.54	0.62	0.46	0.55	0.0377531	0.147716	0.452144	0.402477	0.144836	0.5056	0.5985	0.5855	0.5125	-0.0929	-0.0799	-0.0069	0.013	0.086	0.0929	0.0799	0.0069	0.013	0.086	TRUE	FALSE	FALSE	FALSE	FALSE	TRUE	FALSE	TRUE	TRUE	TRUE	TRUE	TRUE	TRUE
SE	ENSG00000179950	PUF60	chr8:144911450:144911556:-@chr8:144906483:144906566:-@chr8:144903988:144904083:-	0.75	0.74	0.81	0.81	0.65	0.57	0.79	0.74	0.0243744	0.0910341	0.232555	0.0626542	0.171403	0.7456	0.8135	0.6155	0.7725	-0.0679	0.1301	-0.0269	0.198	0.041	0.0679	0.1301	0.0269	0.198	0.041	TRUE	FALSE	FALSE	FALSE	FALSE	TRUE	FALSE	TRUE	TRUE	TRUE	TRUE	TRUE	TRUE
SE	NA	NA	chr8:67579787:67579936:+@chr8:67588980:67589137:+@chr8:67589877:67590189:+	0.53	0.53	0.45	0.46	0.51	0.3	0.67	0.4	0.0236948	0.227926	0.47191	0.36294	0.322278	0.5306	0.4585	0.4105	0.5425	0.0721	0.1201	-0.0119	0.048	-0.084	0.0721	0.1201	0.0119	0.048	0.084	TRUE	FALSE	FALSE	FALSE	FALSE	TRUE	FALSE	TRUE	TRUE	TRUE	TRUE	TRUE	TRUE
SE	ENSG00000104611	SH2D4A	chr8:19192197:19192368:+@chr8:19214714:19214794:+@chr8:19218714:19218825:+	0.56	0.54	0.62	0.61	0.56	0.63	0.57	0.63	0.0304639	0.190563	0.145628	0.350599	0.389938	0.5506	0.6185	0.6005	0.6075	-0.0679	-0.0499	-0.0569	0.018	0.011	0.0679	0.0499	0.0569	0.018	0.011	TRUE	FALSE	FALSE	FALSE	FALSE	TRUE	FALSE	TRUE	TRUE	TRUE	TRUE	TRUE	TRUE
SE	ENSG00000147419	CCDC25	chr8:27610029:27610104:-@chr8:27606012:27606115:-@chr8:27605594:27605796:-	0.51	0.46	0.3	0.33	0.47	0.41	0.43	0.37	0.022742	0.206635	0.0927295	0.0474829	0.0772538	0.4856	0.3185	0.4455	0.4075	0.1671	0.0401	0.0781	-0.127	-0.089	0.1671	0.0401	0.0781	0.127	0.089	TRUE	FALSE	FALSE	TRUE	FALSE	TRUE	TRUE	TRUE	TRUE	TRUE	TRUE	TRUE	TRUE
SE	ENSG00000179950	PUF60	chr8:144911450:144911556:-@chr8:144906483:144906569:-@chr8:144903988:144904083:-	0.84	0.83	0.91	0.9	0.85	0.73	0.86	0.86	0.00510641	0.311099	0.0521564	0.153564	0.0333141	0.8356	0.9085	0.7955	0.8675	-0.0729	0.0401	-0.0319	0.113	0.041	0.0729	0.0401	0.0319	0.113	0.041	TRUE	FALSE	FALSE	FALSE	FALSE	TRUE	FALSE	TRUE	TRUE	TRUE	TRUE	TRUE	TRUE
SE	ENSG00000104381	GDAP1	chr8:75263509:75263701:+@chr8:75272372:75272545:+@chr8:75274119:75274213:+	0.9	0.89	0.84	0.83	0.82	0.83	0.87	0.87	0.00813077	0.00687211	0.0909805	0.190538	0.0350502	0.8956	0.8385	0.8305	0.8775	0.0571	0.0651	0.0181	0.008	-0.039	0.0571	0.0651	0.0181	0.008	0.039	TRUE	TRUE	FALSE	FALSE	FALSE	TRUE	FALSE	FALSE	TRUE	FALSE	TRUE	FALSE	TRUE
SE	ENSG00000123124	WWP1	chr8:87410801:87410867:+@chr8:87414248:87414432:+@chr8:87423767:87424103:+	0.73	0.69	0.59	0.55	0.77	0.66	0.71	0.54	0.0200077	0.443939	0.260539	0.0982035	0.305298	0.7106	0.5735	0.7205	0.6325	0.1371	-0.0099	0.0781	-0.147	-0.059	0.1371	0.0099	0.0781	0.147	0.059	TRUE	FALSE	FALSE	FALSE	FALSE	TRUE	FALSE	TRUE	TRUE	TRUE	TRUE	TRUE	TRUE
SE	ENSG00000173535	TNFRSF10C	chr8:22960327:22960694:+@chr8:22969233:22969338:+@chr8:22972170:22972283:+	0.34	0.32	0.28	0.27	0.57	0.3	0.18	0.14	0.0431686	0.281744	0.017796	0.220478	0.0483673	0.3306	0.2785	0.4405	0.1675	0.0521	-0.1099	0.1631	-0.162	0.111	0.0521	0.1099	0.1631	0.162	0.111	TRUE	FALSE	TRUE	FALSE	TRUE	TRUE	TRUE	FALSE	TRUE	FALSE	TRUE	TRUE	FALSE
SE	ENSG00000156170	NDUFAF6	chr8:96037214:96037433:+@chr8:96044223:96044322:+@chr8:96047682:96047804:+	0.89	0.89	0.82	0.82	0.72	0.77	0.92	0.79	6.58442e-05	0.0572728	0.369218	0.106914	0.326892	0.8906	0.8235	0.7505	0.8625	0.0671	0.1401	0.0281	0.073	-0.039	0.0671	0.1401	0.0281	0.073	0.039	TRUE	FALSE	FALSE	FALSE	FALSE	TRUE	FALSE	TRUE	TRUE	TRUE	TRUE	TRUE	TRUE
SE	ENSG00000134014	ELP3	chr8:27950584:27950750:+@chr8:27954736:27954835:+@chr8:27957345:27957483:+	0.92	0.94	0.88	0.85	0.7	0.88	0.95	0.94	0.0430837	0.18678	0.112218	0.283242	0.0428909	0.9306	0.8685	0.7955	0.9525	0.0621	0.1351	-0.0219	0.073	-0.084	0.0621	0.1351	0.0219	0.073	0.084	TRUE	FALSE	FALSE	FALSE	TRUE	TRUE	TRUE	TRUE	TRUE	TRUE	TRUE	TRUE	TRUE
SE	ENSG00000214050	FBXO16	chr8:28304688:28304790:-@chr8:28286895:28286920:-@chr8:28285929:28286253:-	0.12	0.17	0.38	0.5	0.24	0.43	0.35	0.29	0.0457083	0.13746	0.0222273	0.236539	0.135845	0.1456	0.4435	0.3405	0.3275	-0.2979	-0.1949	-0.1819	0.103	0.116	0.2979	0.1949	0.1819	0.103	0.116	TRUE	FALSE	TRUE	FALSE	FALSE	TRUE	FALSE	FALSE	TRUE	FALSE	TRUE	TRUE	FALSE
SE	ENSG00000164808	KIAA0146	chr8:48192450:48192605:+@chr8:48196617:48196683:+@chr8:48203622:48203726:+	0.92	0.94	0.86	0.84	0.77	0.88	0.85	0.86	0.0146747	0.157781	0.0213159	0.375064	0.258116	0.9306	0.8535	0.8305	0.8625	0.0771	0.1001	0.0681	0.023	-0.009	0.0771	0.1001	0.0681	0.023	0.009	TRUE	FALSE	TRUE	FALSE	FALSE	TRUE	FALSE	FALSE	TRUE	FALSE	TRUE	TRUE	FALSE
SE	ENSG00000176731	C8orf59	chr8:86132535:86132643:-@chr8:86131552:86131592:-@chr8:86129615:86129731:-	0.47	0.42	0.55	0.61	0.59	0.35	0.5	0.35	0.0386234	0.422291	0.44547	0.264067	0.130773	0.4456	0.5835	0.4755	0.4325	-0.1379	-0.0299	0.0131	0.108	0.151	0.1379	0.0299	0.0131	0.108	0.151	TRUE	FALSE	FALSE	FALSE	FALSE	TRUE	FALSE	TRUE	TRUE	TRUE	TRUE	TRUE	TRUE
SE	ENSG00000147535	PPAPDC1B	chr8:38126400:38126508:-@chr8:38125889:38125979:-@chr8:38125415:38125478:-	0.72	0.7	0.63	0.64	0.74	0.59	0.55	0.68	0.023718	0.342755	0.201441	0.370871	0.423781	0.7106	0.6385	0.6705	0.6225	0.0721	0.0401	0.0881	-0.032	0.016	0.0721	0.0401	0.0881	0.032	0.016	TRUE	FALSE	FALSE	FALSE	FALSE	TRUE	FALSE	TRUE	TRUE	TRUE	TRUE	TRUE	TRUE
SE	ENSG00000147526	TACC1	chr8:38677040:38678153:+@chr8:38682829:38682886:+@chr8:38684686:38684893:+	0.67	0.75	0.37	0.4	0.77	0.46	0.45	0.58	0.0247143	0.331797	0.0798322	0.186022	0.138177	0.7106	0.3885	0.6205	0.5225	0.3221	0.0901	0.1881	-0.232	-0.134	0.3221	0.0901	0.1881	0.232	0.134	TRUE	FALSE	FALSE	FALSE	FALSE	TRUE	FALSE	TRUE	TRUE	TRUE	TRUE	TRUE	TRUE
SE	ENSG00000104529	EEF1D	chr8:144679518:144679845:-@chr8:144671161:144672251:-@chr8:144668899:144669022:-	0.44	0.42	0.51	0.53	0.56	0.64	0.56	0.5	0.0121953	0.0634896	0.0704886	0.138421	0.35997	0.4306	0.5235	0.6055	0.5375	-0.0929	-0.1749	-0.1069	-0.082	-0.014	0.0929	0.1749	0.1069	0.082	0.014	TRUE	FALSE	FALSE	FALSE	FALSE	TRUE	FALSE	TRUE	TRUE	TRUE	TRUE	TRUE	TRUE
SE	ENSG00000104756	KCTD9	chr8:25315715:25315984:-@chr8:25303645:25303766:-@chr8:25298093:25298189:-	0.64	0.7	0.36	0.37	0.22	0.28	0.49	0.37	0.0273593	0.005176	0.055577	0.0791609	0.225929	0.6706	0.3685	0.2555	0.4375	0.3021	0.4151	0.2331	0.113	-0.069	0.3021	0.4151	0.2331	0.113	0.069	TRUE	TRUE	FALSE	FALSE	FALSE	TRUE	FALSE	FALSE	TRUE	FALSE	TRUE	FALSE	TRUE
SE	ENSG00000029534	ANK1	chr8:41542062:41542208:-@chr8:41530034:41530430:-@chr8:41529872:41529944:-	0.68	0.65	0.58	0.59	0.38	0.62	0.51	0.38	0.0478204	0.204029	0.0856432	0.307967	0.140001	0.6656	0.5885	0.5055	0.4525	0.0771	0.1601	0.2131	0.083	0.136	0.0771	0.1601	0.2131	0.083	0.136	TRUE	FALSE	FALSE	FALSE	FALSE	TRUE	FALSE	TRUE	TRUE	TRUE	TRUE	TRUE	TRUE
SE	ENSG00000147421	HMBOX1	chr8:28902878:28902960:+@chr8:28904875:28904970:+@chr8:28906471:28906565:+	0.71	0.76	0.56	0.49	0.62	0.63	0.48	0.64	0.023993	0.0661847	0.131968	0.100127	0.358399	0.7356	0.5285	0.6305	0.5675	0.2071	0.1051	0.1681	-0.102	-0.039	0.2071	0.1051	0.1681	0.102	0.039	TRUE	FALSE	FALSE	FALSE	FALSE	TRUE	FALSE	TRUE	TRUE	TRUE	TRUE	TRUE	TRUE
SE	ENSG00000181135	ZNF707	chr8:144766622:144766712:+@chr8:144772227:144772293:+@chr8:144773243:144773369:+	0.67	0.66	0.58	0.58	0.62	0.82	0.59	0.59	0.020107	0.328884	0.0243019	0.196047	0.00127065	0.6656	0.5835	0.7255	0.5975	0.0821	-0.0599	0.0681	-0.142	-0.014	0.0821	0.0599	0.0681	0.142	0.014	TRUE	FALSE	TRUE	FALSE	FALSE	TRUE	FALSE	FALSE	TRUE	FALSE	TRUE	TRUE	FALSE
SE	ENSG00000187954	CYHR1	chr8:145690192:145690479:-@chr8:145689843:145689995:-@chr8:145678605:145678843:-	0.86	0.88	0.79	0.82	0.75	0.76	0.87	0.65	0.0488987	0.0100631	0.259234	0.0842719	0.386056	0.8706	0.8085	0.7605	0.7675	0.0621	0.1101	0.1031	0.048	0.041	0.0621	0.1101	0.1031	0.048	0.041	TRUE	TRUE	FALSE	FALSE	FALSE	TRUE	FALSE	FALSE	TRUE	FALSE	TRUE	FALSE	TRUE
SE	ENSG00000070718	AP3M2	chr8:42015459:42015630:+@chr8:42019799:42019936:+@chr8:42022589:42022674:+	0.9	0.87	0.81	0.77	0.74	0.8	0.76	0.72	0.0355602	0.0616656	0.0173216	0.337885	0.118622	0.8856	0.7935	0.7755	0.7475	0.0921	0.1101	0.1381	0.018	0.046	0.0921	0.1101	0.1381	0.018	0.046	TRUE	FALSE	TRUE	FALSE	FALSE	TRUE	FALSE	FALSE	TRUE	FALSE	TRUE	TRUE	FALSE
SE	ENSG00000214050	FBXO16	chr8:28340865:28340979:-@chr8:28331289:28331324:-@chr8:28321129:28321335:-	0.79	0.83	0.64	0.61	0.22	0.58	0.82	0.77	0.0109035	0.131824	0.41072	0.216106	0.0206682	0.8106	0.6285	0.4055	0.8025	0.1821	0.4051	0.0081	0.223	-0.174	0.1821	0.4051	0.0081	0.223	0.174	TRUE	FALSE	FALSE	FALSE	TRUE	TRUE	TRUE	TRUE	TRUE	TRUE	TRUE	TRUE	TRUE
SE	ENSG00000164808	KIAA0146	chr8:48173489:48173583:+@chr8:48192450:48192605:+@chr8:48203622:48203726:+	0.69	0.7	0.57	0.53	0.64	0.74	0.59	0.53	0.0367387	0.49937	0.0684716	0.0920056	0.36775	0.6956	0.5535	0.6955	0.5675	0.1421	0.0001	0.1281	-0.142	-0.014	0.1421	0.0001	0.1281	0.142	0.014	TRUE	FALSE	FALSE	FALSE	FALSE	TRUE	FALSE	TRUE	TRUE	TRUE	TRUE	TRUE	TRUE
SE	ENSG00000167700	MFSD3	chr8:145734552:145735398:+@chr8:145735743:145735890:+@chr8:145735981:145736105:+	0.75	0.73	0.63	0.67	0.73	0.61	0.6	0.56	0.0492587	0.233974	0.0195609	0.388447	0.0725941	0.7406	0.6535	0.6755	0.5875	0.0871	0.0651	0.1531	-0.022	0.066	0.0871	0.0651	0.1531	0.022	0.066	TRUE	FALSE	TRUE	FALSE	FALSE	TRUE	FALSE	FALSE	TRUE	FALSE	TRUE	TRUE	FALSE
SE	ENSG00000040341	STAU2	chr8:74621267:74621397:-@chr8:74600889:74601048:-@chr8:74585342:74585477:-	0.88	0.9	0.82	0.82	0.77	0.83	0.83	0.86	0.044863	0.0972703	0.0982607	0.330289	0.156114	0.8906	0.8235	0.8055	0.8525	0.0671	0.0851	0.0381	0.018	-0.029	0.0671	0.0851	0.0381	0.018	0.029	TRUE	FALSE	FALSE	FALSE	FALSE	TRUE	FALSE	TRUE	TRUE	TRUE	TRUE	TRUE	TRUE
SE	ENSG00000215262	KCNU1	chr8:36780008:36780147:+@chr8:36780501:36780562:+@chr8:36788469:36788663:+	0.06	0.09	0.26	0.24	0.28	0.13	0.11	0.14	0.00770157	0.156364	0.0582899	0.333263	0.0172164	0.0756	0.2535	0.2105	0.1325	-0.1779	-0.1349	-0.0569	0.043	0.121	0.1779	0.1349	0.0569	0.043	0.121	TRUE	FALSE	FALSE	FALSE	TRUE	TRUE	TRUE	TRUE	TRUE	TRUE	TRUE	TRUE	TRUE
SE	ENSG00000160957	RECQL4	chr8:145738025:145738154:-@chr8:145737775:145737944:-@chr8:145737527:145737707:-	0.94	0.94	0.89	0.88	0.83	0.93	0.92	0.92	0.0265701	0.236139	0.00148198	0.48113	0.0350502	0.9406	0.8885	0.8855	0.9275	0.0521	0.0551	0.0131	0.003	-0.039	0.0521	0.0551	0.0131	0.003	0.039	TRUE	FALSE	FALSE	FALSE	FALSE	TRUE	FALSE	TRUE	TRUE	TRUE	TRUE	TRUE	TRUE
SE	ENSG00000147324	MFHAS1	chr8:8654875:8655001:-@chr8:8647834:8647944:-@chr8:8641999:8643565:-	0.05	0.08	0.15	0.12	0.1	0.07	0.13	0.12	0.0356328	0.174931	0.0563287	0.0720422	0.375892	0.0656	0.1385	0.0905	0.1325	-0.0729	-0.0249	-0.0669	0.048	0.006	0.0729	0.0249	0.0669	0.048	0.006	TRUE	FALSE	FALSE	FALSE	FALSE	TRUE	FALSE	TRUE	TRUE	TRUE	TRUE	TRUE	TRUE
SE	ENSG00000198169	ZNF251	chr8:145980790:145980970:-@chr8:145980081:145980188:-@chr8:145979577:145979706:-	0.86	0.86	0.79	0.8	0.75	0.81	0.72	0.81	0.0275349	0.122771	0.151737	0.371873	0.334655	0.8606	0.7985	0.7855	0.7725	0.0621	0.0751	0.0881	0.013	0.026	0.0621	0.0751	0.0881	0.013	0.026	TRUE	FALSE	FALSE	FALSE	FALSE	TRUE	FALSE	TRUE	TRUE	TRUE	TRUE	TRUE	TRUE
SE	ENSG00000196922	ZNF252P	chr8:146224989:146225155:-@chr8:146221893:146221993:-@chr8:146219865:146219978:-	0.65	0.61	0.79	0.84	0.82	0.74	0.85	0.69	0.0160734	0.0545445	0.150944	0.282948	0.348927	0.6306	0.8185	0.7855	0.7775	-0.1879	-0.1549	-0.1469	0.033	0.041	0.1879	0.1549	0.1469	0.033	0.041	TRUE	FALSE	FALSE	FALSE	FALSE	TRUE	FALSE	TRUE	TRUE	TRUE	TRUE	TRUE	TRUE
SE	ENSG00000164733	CTSB	chr8:11724763:11724900:-@chr8:11721885:11721972:-@chr8:11710838:11710988:-	0.7	0.81	0.49	0.42	0.7	0.46	0.54	0.55	0.0300624	0.184339	0.082046	0.236701	0.108348	0.7556	0.4585	0.5855	0.5525	0.2971	0.1701	0.2031	-0.127	-0.094	0.2971	0.1701	0.2031	0.127	0.094	TRUE	FALSE	FALSE	FALSE	FALSE	TRUE	FALSE	TRUE	TRUE	TRUE	TRUE	TRUE	TRUE
SE	ENSG00000157349	DDX19B	chr16:70333072:70333257:+@chr16:70346512:70346560:+@chr16:70348805:70348858:+	0.78	0.79	0.92	0.89	0.67	0.83	0.87	0.86	0.0271401	0.386116	0.0027246	0.150386	0.110373	0.7856	0.9085	0.7555	0.8725	-0.1229	0.0301	-0.0869	0.153	0.036	0.1229	0.0301	0.0869	0.153	0.036	TRUE	FALSE	TRUE	FALSE	FALSE	TRUE	FALSE	FALSE	TRUE	FALSE	TRUE	TRUE	FALSE
SE	ENSG00000255439	RP11-196G11.1	chr16:31104633:31104742:-@chr16:31102413:31102663:-@chr16:31099127:31099147:-	0.47	0.49	0.37	0.4	0.49	0.39	0.62	0.49	0.0264582	0.303072	0.21067	0.222815	0.105304	0.4806	0.3885	0.4455	0.5625	0.0921	0.0351	-0.0819	-0.057	-0.174	0.0921	0.0351	0.0819	0.057	0.174	TRUE	FALSE	FALSE	FALSE	FALSE	TRUE	FALSE	TRUE	TRUE	TRUE	TRUE	TRUE	TRUE
SE	ENSG00000185324	CDK10	chr16:89753076:89753205:+@chr16:89753997:89754223:+@chr16:89755660:89755732:+	0.3	0.4	0.65	0.69	0.5	0.56	0.59	0.29	0.0316176	0.0546237	0.316667	0.0392731	0.18421	0.3506	0.6735	0.5355	0.4475	-0.3229	-0.1849	-0.0969	0.138	0.226	0.3229	0.1849	0.0969	0.138	0.226	TRUE	FALSE	FALSE	TRUE	FALSE	TRUE	TRUE	TRUE	TRUE	TRUE	TRUE	TRUE	TRUE
SE	ENSG00000005189	AC004381.6	chr16:20851653:20851790:+@chr16:20855256:20855348:+@chr16:20855951:20856167:+	0.64	0.67	0.77	0.75	0.41	0.66	0.64	0.68	0.0178712	0.263194	0.343618	0.162494	0.0453498	0.6556	0.7635	0.5405	0.6675	-0.1079	0.1151	-0.0119	0.223	0.096	0.1079	0.1151	0.0119	0.223	0.096	TRUE	FALSE	FALSE	FALSE	TRUE	TRUE	TRUE	TRUE	TRUE	TRUE	TRUE	TRUE	TRUE
SE	NA	NA	chr16:23652431:23652678:-@chr16:23649780:23649913:-@chr16:23649391:23649450:-	0.05	0.05	0.13	0.12	0.1	0.11	0.24	0.14	0.0176829	0.0285513	0.103445	0.0658486	0.197342	0.0506	0.1285	0.1105	0.1975	-0.0779	-0.0599	-0.1469	0.018	-0.069	0.0779	0.0599	0.1469	0.018	0.069	TRUE	TRUE	FALSE	FALSE	FALSE	TRUE	FALSE	FALSE	TRUE	FALSE	TRUE	FALSE	TRUE
SE	ENSG00000102878	HSF4	chr16:67201378:67201502:+@chr16:67201727:67201850:+@chr16:67202734:67202839:+	0.76	0.83	0.6	0.51	0.7	0.53	0.45	0.7	0.0288499	0.127717	0.16219	0.300296	0.440882	0.7956	0.5585	0.6205	0.5825	0.2371	0.1751	0.2131	-0.062	-0.024	0.2371	0.1751	0.2131	0.062	0.024	TRUE	FALSE	FALSE	FALSE	FALSE	TRUE	FALSE	TRUE	TRUE	TRUE	TRUE	TRUE	TRUE
SE	ENSG00000103544	C16orf62	chr16:19592847:19592975:+@chr16:19603112:19603196:+@chr16:19612986:19613045:+	0.66	0.64	0.78	0.79	0.51	0.74	0.62	0.73	0.0089976	0.445198	0.333784	0.200727	0.152323	0.6506	0.7885	0.6305	0.6825	-0.1379	0.0201	-0.0319	0.158	0.106	0.1379	0.0201	0.0319	0.158	0.106	TRUE	FALSE	FALSE	FALSE	FALSE	TRUE	FALSE	TRUE	TRUE	TRUE	TRUE	TRUE	TRUE
SE	ENSG00000141013	GAS8	chr16:90094044:90094130:+@chr16:90097584:90097597:+@chr16:90097707:90097904:+	0.05	0.06	0.14	0.14	0.2	0.05	0.11	0.04	0.0156892	0.248947	0.288745	0.44501	0.163816	0.0556	0.1435	0.1305	0.0825	-0.0879	-0.0749	-0.0269	0.013	0.061	0.0879	0.0749	0.0269	0.013	0.061	TRUE	FALSE	FALSE	FALSE	FALSE	TRUE	FALSE	TRUE	TRUE	TRUE	TRUE	TRUE	TRUE
SE	ENSG00000167522	ANKRD11	chr16:89556653:89556969:-@chr16:89497664:89497734:-@chr16:89484692:89484776:-	0.26	0.26	0.1	0.06	0.22	0.26	0.04	0.14	0.0348556	0.297909	0.0955674	0.0146701	0.415514	0.2606	0.0835	0.2455	0.0975	0.1771	0.0151	0.1631	-0.162	-0.014	0.1771	0.0151	0.1631	0.162	0.014	TRUE	FALSE	FALSE	TRUE	FALSE	TRUE	TRUE	TRUE	TRUE	TRUE	TRUE	TRUE	TRUE
SE	ENSG00000102908	NFAT5	chr16:69599869:69600277:+@chr16:69602398:69602451:+@chr16:69660306:69660431:+	0.22	0.25	0.13	0.13	0.35	0.2	0.26	0.27	0.0450501	0.327103	0.10437	0.149305	0.0120232	0.2356	0.1335	0.2805	0.2725	0.1021	-0.0449	-0.0369	-0.147	-0.139	0.1021	0.0449	0.0369	0.147	0.139	TRUE	FALSE	FALSE	FALSE	TRUE	TRUE	TRUE	TRUE	TRUE	TRUE	TRUE	TRUE	TRUE
SE	ENSG00000185864	RP11-645C24.1	chr16:21868580:21868737:-@chr16:21863091:21863367:-@chr16:21858734:21858862:-	0.83	0.85	0.79	0.78	0.65	0.81	0.79	0.74	0.0368951	0.206907	0.0928862	0.314616	0.315472	0.8406	0.7885	0.7355	0.7725	0.0521	0.1051	0.0681	0.053	0.016	0.0521	0.1051	0.0681	0.053	0.016	TRUE	FALSE	FALSE	FALSE	FALSE	TRUE	FALSE	TRUE	TRUE	TRUE	TRUE	TRUE	TRUE
SE	ENSG00000067955	CBFB	chr16:67063630:67063716:+@chr16:67070542:67070658:+@chr16:67100585:67100701:+	0.79	0.82	0.87	0.88	0.76	0.86	0.82	0.83	0.0467476	0.439006	0.145815	0.214185	0.0137106	0.8056	0.8785	0.8155	0.8325	-0.0729	-0.0099	-0.0269	0.063	0.046	0.0729	0.0099	0.0269	0.063	0.046	TRUE	FALSE	FALSE	FALSE	FALSE	TRUE	FALSE	TRUE	TRUE	TRUE	TRUE	TRUE	TRUE
SE	ENSG00000157353	FUK	chr16:70509551:70509670:+@chr16:70510090:70510237:+@chr16:70512175:70512362:+	0.04	0.05	0.12	0.15	0.23	0.21	0.07	0.07	0.0420291	0.00610145	0.0439994	0.0291616	0.0790442	0.0456	0.1385	0.2255	0.0775	-0.0929	-0.1799	-0.0319	-0.087	0.061	0.0929	0.1799	0.0319	0.087	0.061	TRUE	TRUE	FALSE	TRUE	FALSE	TRUE	TRUE	FALSE	TRUE	FALSE	TRUE	FALSE	TRUE
SE	ENSG00000124067	SLC12A4	chr16:68002342:68002597:-@chr16:67996147:67997462:-@chr16:67995478:67995609:-	0.72	0.78	0.52	0.44	0.64	0.68	0.68	0.45	0.0191099	0.0786218	0.175978	0.0434363	0.288299	0.7506	0.4835	0.6655	0.5725	0.2671	0.0851	0.1781	-0.182	-0.089	0.2671	0.0851	0.1781	0.182	0.089	TRUE	FALSE	FALSE	TRUE	FALSE	TRUE	TRUE	TRUE	TRUE	TRUE	TRUE	TRUE	TRUE
SE	NA	NA	chr16:84220507:84220676:-@chr16:84218457:84218505:-@chr16:84217303:84217384:-	0.49	0.54	0.83	0.74	0.57	0.73	0.47	0.39	0.0274264	0.157492	0.129345	0.158348	0.0142326	0.5156	0.7885	0.6555	0.4375	-0.2729	-0.1399	0.0781	0.133	0.351	0.2729	0.1399	0.0781	0.133	0.351	TRUE	FALSE	FALSE	FALSE	TRUE	TRUE	TRUE	TRUE	TRUE	TRUE	TRUE	TRUE	TRUE
SE	ENSG00000185324	CDK10	chr16:89760581:89760640:+@chr16:89760977:89761196:+@chr16:89761339:89761478:+	0.64	0.66	0.59	0.6	0.61	0.47	0.58	0.67	0.0321269	0.184133	0.379733	0.292458	0.295395	0.6506	0.5985	0.5455	0.6325	0.0521	0.1051	0.0181	0.053	-0.034	0.0521	0.1051	0.0181	0.053	0.034	TRUE	FALSE	FALSE	FALSE	FALSE	TRUE	FALSE	TRUE	TRUE	TRUE	TRUE	TRUE	TRUE
SE	ENSG00000167978	SRRM2	chr16:2802627:2802855:+@chr16:2806335:2806607:+@chr16:2807473:2807580:+	0.8	0.82	0.64	0.57	0.74	0.64	0.69	0.68	0.0442314	0.124359	0.0118188	0.149893	0.121677	0.8106	0.6085	0.6955	0.6925	0.2021	0.1151	0.1181	-0.087	-0.084	0.2021	0.1151	0.1181	0.087	0.084	TRUE	FALSE	TRUE	FALSE	FALSE	TRUE	FALSE	FALSE	TRUE	FALSE	TRUE	TRUE	FALSE
SE	ENSG00000242612,ENSG00000103202	DECR2,NME4	chr16:456346:456397:+@chr16:456685:456952:+@chr16:457425:457560:+	0.03	0.06	0.27	0.3	0.1	0.49	0.36	0.14	0.0038475	0.207801	0.149649	0.4805	0.412313	0.0456	0.2885	0.3005	0.2575	-0.2429	-0.2549	-0.2119	-0.012	0.031	0.2429	0.2549	0.2119	0.012	0.031	TRUE	FALSE	FALSE	FALSE	FALSE	TRUE	FALSE	TRUE	TRUE	TRUE	TRUE	TRUE	TRUE
SE	ENSG00000103064	SLC7A6	chr16:68321649:68321774:+@chr16:68324299:68324443:+@chr16:68325112:68325235:+	0.87	0.88	0.92	0.93	0.88	0.84	0.93	0.91	0.00972226	0.347932	0.0357607	0.0850057	0.468741	0.8756	0.9285	0.8655	0.9275	-0.0529	0.0101	-0.0519	0.063	0.001	0.0529	0.0101	0.0519	0.063	0.001	TRUE	FALSE	TRUE	FALSE	FALSE	TRUE	FALSE	FALSE	TRUE	FALSE	TRUE	TRUE	FALSE
SE	ENSG00000047578	KIAA0556	chr16:27585222:27585277:+@chr16:27629746:27629822:+@chr16:27639982:27640151:+	0.74	0.78	0.86	0.83	0.72	0.48	0.71	0.69	0.0389489	0.206889	0.0906315	0.143606	0.0112005	0.7606	0.8485	0.6055	0.7075	-0.0879	0.1551	0.0531	0.243	0.141	0.0879	0.1551	0.0531	0.243	0.141	TRUE	FALSE	FALSE	FALSE	TRUE	TRUE	TRUE	TRUE	TRUE	TRUE	TRUE	TRUE	TRUE
SE	ENSG00000168096	ANKS3	chr16:4779981:4780152:-@chr16:4774751:4774832:-@chr16:4764052:4764187:-	0.36	0.34	0.6	0.57	0.77	0.63	0.47	0.55	0.0040323	0.0583403	0.0667889	0.166174	0.153941	0.3506	0.5885	0.7055	0.5175	-0.2379	-0.3549	-0.1669	-0.117	0.071	0.2379	0.3549	0.1669	0.117	0.071	TRUE	FALSE	FALSE	FALSE	FALSE	TRUE	FALSE	TRUE	TRUE	TRUE	TRUE	TRUE	TRUE
SE	ENSG00000185324	CDK10	chr16:89753997:89754223:+@chr16:89755660:89755714:+@chr16:89756961:89757032:+	0.18	0.21	0.47	0.49	0.38	0.69	0.34	0.25	0.0028835	0.133629	0.113186	0.388181	0.0689863	0.1956	0.4835	0.5405	0.3025	-0.2879	-0.3449	-0.1069	-0.057	0.181	0.2879	0.3449	0.1069	0.057	0.181	TRUE	FALSE	FALSE	FALSE	FALSE	TRUE	FALSE	TRUE	TRUE	TRUE	TRUE	TRUE	TRUE
SE	ENSG00000166747	AP1G1	chr16:71841918:71842053:-@chr16:71841704:71841741:-@chr16:71823182:71823385:-	0.2	0.19	0.32	0.29	0.24	0.06	0.24	0.22	0.0271092	0.365922	0.0440102	0.165644	0.0349397	0.1956	0.3085	0.1555	0.2375	-0.1129	0.0401	-0.0419	0.153	0.071	0.1129	0.0401	0.0419	0.153	0.071	TRUE	FALSE	FALSE	FALSE	TRUE	TRUE	TRUE	TRUE	TRUE	TRUE	TRUE	TRUE	TRUE
SE	NA	NA	chr16:4563697:4563852:-@chr16:4562792:4562948:-@chr16:4560677:4562684:-	0.61	0.61	0.82	0.8	0.85	0.73	0.76	0.68	0.0147551	0.0990927	0.103706	0.406658	0.130048	0.6106	0.8135	0.7955	0.7275	-0.2029	-0.1849	-0.1169	0.018	0.086	0.2029	0.1849	0.1169	0.018	0.086	TRUE	FALSE	FALSE	FALSE	FALSE	TRUE	FALSE	TRUE	TRUE	TRUE	TRUE	TRUE	TRUE
SE	NA	NA	chr16:66586466:66586696:+@chr16:66596975:66597120:+@chr16:66599789:66600190:+	0.86	0.89	0.96	0.94	0.86	0.85	0.87	0.83	0.0305238	0.240971	0.27008	0.0161053	0.0411303	0.8756	0.9535	0.8605	0.8575	-0.0779	0.0151	0.0181	0.093	0.096	0.0779	0.0151	0.0181	0.093	0.096	TRUE	FALSE	FALSE	TRUE	TRUE	TRUE	TRUE	TRUE	TRUE	TRUE	TRUE	TRUE	TRUE
SE	ENSG00000159593	NAE1	chr16:66864750:66864879:-@chr16:66860571:66860683:-@chr16:66860426:66860486:-	0.55	0.58	0.66	0.64	0.61	0.48	0.46	0.5	0.0250741	0.427178	0.0510632	0.175873	0.0214709	0.5656	0.6535	0.5505	0.4875	-0.0879	0.0151	0.0781	0.103	0.166	0.0879	0.0151	0.0781	0.103	0.166	TRUE	FALSE	FALSE	FALSE	TRUE	TRUE	TRUE	TRUE	TRUE	TRUE	TRUE	TRUE	TRUE
SE	ENSG00000178773	CPNE7	chr16:89657415:89657466:+@chr16:89657535:89657668:+@chr16:89661775:89662011:+	0.24	0.27	0.14	0.17	0.22	0.2	0.21	0.08	0.0225889	0.0841568	0.173091	0.0557984	0.470695	0.2556	0.1585	0.2155	0.1525	0.0971	0.0401	0.1031	-0.057	0.006	0.0971	0.0401	0.1031	0.057	0.006	TRUE	FALSE	FALSE	FALSE	FALSE	TRUE	FALSE	TRUE	TRUE	TRUE	TRUE	TRUE	TRUE
SE	ENSG00000162104	ADCY9	chr16:4163751:4165486:-@chr16:4057369:4057559:-@chr16:4043407:4043511:-	0.95	0.94	0.85	0.88	0.8	0.85	0.95	0.91	0.0487471	0.0631	0.375214	0.176557	0.0577162	0.9456	0.8685	0.8305	0.9375	0.0771	0.1151	0.0081	0.038	-0.069	0.0771	0.1151	0.0081	0.038	0.069	TRUE	FALSE	FALSE	FALSE	FALSE	TRUE	FALSE	TRUE	TRUE	TRUE	TRUE	TRUE	TRUE
SE	ENSG00000140950	KIAA1609	chr16:84538207:84538288:-@chr16:84537564:84537753:-@chr16:84531540:84531717:-	0.49	0.45	0.28	0.35	0.38	0.5	0.67	0.27	0.0456816	0.375839	0.489009	0.120461	0.285007	0.4706	0.3185	0.4455	0.4775	0.1521	0.0251	-0.0069	-0.127	-0.159	0.1521	0.0251	0.0069	0.127	0.159	TRUE	FALSE	FALSE	FALSE	FALSE	TRUE	FALSE	TRUE	TRUE	TRUE	TRUE	TRUE	TRUE
SE	ENSG00000103034	NDRG4	chr16:58528868:58528912:+@chr16:58533048:58534981:+@chr16:58537610:58537807:+	0.4	0.44	0.55	0.54	0.57	0.56	0.54	0.44	0.0417751	0.0351499	0.171261	0.0372265	0.244799	0.4206	0.5485	0.5705	0.4975	-0.1279	-0.1499	-0.0769	-0.022	0.051	0.1279	0.1499	0.0769	0.022	0.051	TRUE	TRUE	FALSE	FALSE	FALSE	TRUE	FALSE	FALSE	TRUE	FALSE	TRUE	FALSE	TRUE
SE	ENSG00000124067	SLC12A4	chr16:68002342:68002597:-@chr16:67997340:67997462:-@chr16:67995478:67995609:-	0.93	0.94	0.85	0.84	0.84	0.94	0.89	0.89	0.00271221	0.286142	0.0367649	0.261075	0.027788	0.9356	0.8485	0.8955	0.8975	0.0871	0.0401	0.0381	-0.047	-0.049	0.0871	0.0401	0.0381	0.047	0.049	TRUE	FALSE	FALSE	FALSE	FALSE	TRUE	FALSE	TRUE	TRUE	TRUE	TRUE	TRUE	TRUE
SE	ENSG00000169203,ENSG00000254634	RP11-231C14.4,RP11-231C14.3	chr16:29516794:29516951:-@chr16:29511319:29511595:-@chr16:29506800:29506928:-	0.65	0.72	0.82	0.88	0.81	0.55	0.8	0.66	0.0347388	0.499757	0.296676	0.205117	0.158576	0.6856	0.8535	0.6855	0.7375	-0.1679	0.0001	-0.0519	0.168	0.116	0.1679	0.0001	0.0519	0.168	0.116	TRUE	FALSE	FALSE	FALSE	FALSE	TRUE	FALSE	TRUE	TRUE	TRUE	TRUE	TRUE	TRUE
SE	ENSG00000168807	SNTB2	chr16:69221050:69221649:+@chr16:69269651:69269736:+@chr16:69279505:69279718:+	0.03	0.02	0.07	0.09	0.13	0.04	0.04	0.08	0.0338356	0.189941	0.13697	0.450666	0.289729	0.0256	0.0835	0.0905	0.0675	-0.0579	-0.0649	-0.0419	-0.007	0.016	0.0579	0.0649	0.0419	0.007	0.016	TRUE	FALSE	FALSE	FALSE	FALSE	TRUE	FALSE	TRUE	TRUE	TRUE	TRUE	TRUE	TRUE
SE	ENSG00000102878	HSF4	chr16:67201378:67201502:+@chr16:67201623:67201850:+@chr16:67202734:67202839:+	0.67	0.73	0.53	0.58	0.53	0.64	0.59	0.55	0.035106	0.129645	0.0451962	0.335501	0.308752	0.7006	0.5585	0.5905	0.5775	0.1421	0.1101	0.1231	-0.032	-0.019	0.1421	0.1101	0.1231	0.032	0.019	TRUE	FALSE	TRUE	FALSE	FALSE	TRUE	FALSE	FALSE	TRUE	FALSE	TRUE	TRUE	FALSE
SE	NA	NA	chr16:15149748:15149936:-@chr16:15141712:15141777:-@chr16:15141299:15141407:-	0.55	0.59	0.67	0.65	0.38	0.38	0.65	0.5	0.0434648	0.0335012	0.450013	0.0106981	0.235745	0.5706	0.6635	0.3855	0.5825	-0.0929	0.1851	-0.0119	0.278	0.081	0.0929	0.1851	0.0119	0.278	0.081	TRUE	TRUE	FALSE	TRUE	FALSE	TRUE	TRUE	FALSE	TRUE	FALSE	TRUE	FALSE	TRUE
SE	ENSG00000103274	NUBP1	chr16:10855614:10855716:+@chr16:10861806:10861889:+@chr16:10862904:10863208:+	0.81	0.85	0.91	0.95	0.79	0.94	0.92	0.89	0.0342434	0.345337	0.0437991	0.276975	0.24963	0.8306	0.9335	0.8705	0.9125	-0.1029	-0.0399	-0.0819	0.063	0.021	0.1029	0.0399	0.0819	0.063	0.021	TRUE	FALSE	TRUE	FALSE	FALSE	TRUE	FALSE	FALSE	TRUE	FALSE	TRUE	TRUE	FALSE
SE	ENSG00000008517	IL32	chr16:3115313:3115495:+@chr16:3115785:3115827:+@chr16:3117378:3117416:+	0.77	0.67	0.44	0.54	0.54	0.2	0.51	0.54	0.0430696	0.135742	0.0710692	0.305673	0.289337	0.7206	0.4935	0.3755	0.5325	0.2271	0.3451	0.1881	0.118	-0.039	0.2271	0.3451	0.1881	0.118	0.039	TRUE	FALSE	FALSE	FALSE	FALSE	TRUE	FALSE	TRUE	TRUE	TRUE	TRUE	TRUE	TRUE
SE	ENSG00000170540,ENSG00000260342	ARL6IP1,RP11-1035H13.3	chr16:18809247:18809366:-@chr16:18806786:18806903:-@chr16:18805921:18806005:-	0.88	0.9	0.95	0.95	0.92	0.93	0.94	0.93	0.0478306	0.0478379	0.037089	0.0734552	0.121866	0.8906	0.9535	0.9305	0.9425	-0.0629	-0.0399	-0.0519	0.023	0.011	0.0629	0.0399	0.0519	0.023	0.011	TRUE	FALSE	TRUE	FALSE	FALSE	TRUE	FALSE	FALSE	TRUE	FALSE	TRUE	TRUE	FALSE
SE	ENSG00000103148	NPRL3	chr16:169125:169254:-@chr16:167300:167374:-@chr16:162621:162774:-	0.84	0.79	0.66	0.72	0.72	0.75	0.6	0.83	0.0475663	0.0765285	0.282905	0.170308	0.422263	0.8156	0.6935	0.7405	0.7225	0.1221	0.0751	0.0931	-0.047	-0.029	0.1221	0.0751	0.0931	0.047	0.029	TRUE	FALSE	FALSE	FALSE	FALSE	TRUE	FALSE	TRUE	TRUE	TRUE	TRUE	TRUE	TRUE
SE	ENSG00000135723	FHOD1	chr16:67265333:67265452:-@chr16:67265091:67265252:-@chr16:67264504:67264694:-	0.86	0.84	0.78	0.75	0.92	0.93	0.88	0.9	0.0264541	0.0203723	0.0433012	0.0169321	0.0119571	0.8506	0.7685	0.9305	0.8975	0.0821	-0.0799	-0.0469	-0.162	-0.129	0.0821	0.0799	0.0469	0.162	0.129	TRUE	TRUE	FALSE	TRUE	TRUE	TRUE	TRUE	FALSE	TRUE	FALSE	TRUE	FALSE	TRUE
SE	ENSG00000140987	ZNF434	chr16:3443649:3443814:-@chr16:3440010:3440183:-@chr16:3434459:3434941:-	0.54	0.51	0.61	0.65	0.54	0.55	0.45	0.56	0.0296049	0.16627	0.426844	0.0673651	0.12294	0.5256	0.6335	0.5505	0.5125	-0.1079	-0.0249	0.0131	0.083	0.121	0.1079	0.0249	0.0131	0.083	0.121	TRUE	FALSE	FALSE	FALSE	FALSE	TRUE	FALSE	TRUE	TRUE	TRUE	TRUE	TRUE	TRUE
SE	ENSG00000135541	AHI1	chr6:135811761:135811885:-@chr6:135788719:135788772:-@chr6:135786952:135787511:-	0.8	0.79	0.57	0.63	0.74	0.45	0.86	0.84	0.0459477	0.202796	0.0244601	0.493431	0.0280056	0.7956	0.6035	0.6005	0.8575	0.1921	0.1951	-0.0619	0.003	-0.254	0.1921	0.1951	0.0619	0.003	0.254	TRUE	FALSE	TRUE	FALSE	TRUE	TRUE	TRUE	FALSE	TRUE	FALSE	TRUE	TRUE	FALSE
SE	ENSG00000112186	CAP2	chr6:17463227:17463304:+@chr6:17507400:17507543:+@chr6:17539500:17539689:+	0.34	0.27	0.52	0.53	0.75	0.46	0.5	0.26	0.0468713	0.13378	0.308078	0.33569	0.223637	0.3056	0.5285	0.6105	0.3875	-0.2229	-0.3049	-0.0819	-0.082	0.141	0.2229	0.3049	0.0819	0.082	0.141	TRUE	FALSE	FALSE	FALSE	FALSE	TRUE	FALSE	TRUE	TRUE	TRUE	TRUE	TRUE	TRUE
SE	NA	NA	chr6:34724871:34725328:+@chr6:34725689:34725731:+@chr6:34730372:34730480:+	0.66	0.71	0.82	0.87	0.73	0.7	0.86	0.72	0.022152	0.184999	0.167042	0.0363098	0.297637	0.6856	0.8485	0.7205	0.7975	-0.1629	-0.0349	-0.1119	0.128	0.051	0.1629	0.0349	0.1119	0.128	0.051	TRUE	FALSE	FALSE	TRUE	FALSE	TRUE	TRUE	TRUE	TRUE	TRUE	TRUE	TRUE	TRUE
SE	ENSG00000204392	LSM2	chr6:31774532:31774761:-@chr6:31773852:31773919:-@chr6:31766254:31766284:-	0.91	0.94	0.87	0.85	0.91	0.89	0.88	0.78	0.043808	0.191998	0.154502	0.044446	0.34601	0.9256	0.8635	0.9055	0.8375	0.0621	0.0201	0.0881	-0.042	0.026	0.0621	0.0201	0.0881	0.042	0.026	TRUE	FALSE	FALSE	FALSE	FALSE	TRUE	FALSE	TRUE	TRUE	TRUE	TRUE	TRUE	TRUE
SE	ENSG00000204536	CCHCR1	chr6:31125944:31125971:-@chr6:31124800:31124932:-@chr6:31124508:31124721:-	0.12	0.24	0.39	0.46	0.26	0.65	0.05	0.15	0.0469526	0.187244	0.225227	0.448543	0.0218988	0.1806	0.4285	0.4605	0.1075	-0.2479	-0.2799	0.0731	-0.032	0.321	0.2479	0.2799	0.0731	0.032	0.321	TRUE	FALSE	FALSE	FALSE	TRUE	TRUE	TRUE	TRUE	TRUE	TRUE	TRUE	TRUE	TRUE
SE	ENSG00000146373	RNF217	chr6:125402582:125402653:+@chr6:125403595:125403709:+@chr6:125404010:125404661:+	0.03	0.02	0.09	0.07	0.08	0.03	0.04	0.03	0.0270877	0.190808	0.0710576	0.256827	0.0499838	0.0256	0.0835	0.0605	0.0425	-0.0579	-0.0349	-0.0169	0.023	0.041	0.0579	0.0349	0.0169	0.023	0.041	TRUE	FALSE	FALSE	FALSE	FALSE	TRUE	FALSE	TRUE	TRUE	TRUE	TRUE	TRUE	TRUE
SE	NA	NA	chr6:28104523:28105071:-@chr6:28093401:28093597:-@chr6:28089573:28090989:-	0.11	0.12	0.03	0.02	0.08	0.1	0.05	0.07	0.00271221	0.137728	0.0481639	0.0316235	0.0636309	0.1156	0.0285	0.0955	0.0675	0.0871	0.0201	0.0481	-0.067	-0.039	0.0871	0.0201	0.0481	0.067	0.039	TRUE	FALSE	FALSE	TRUE	FALSE	TRUE	TRUE	TRUE	TRUE	TRUE	TRUE	TRUE	TRUE
SE	ENSG00000137274	BPHL	chr6:3137596:3137727:+@chr6:3138275:3138413:+@chr6:3140620:3140743:+	0.15	0.22	0.34	0.42	0.27	0.11	0.4	0.05	0.0339355	0.461778	0.416708	0.105958	0.271391	0.1856	0.3835	0.1955	0.2325	-0.1979	-0.0099	-0.0469	0.188	0.151	0.1979	0.0099	0.0469	0.188	0.151	TRUE	FALSE	FALSE	FALSE	FALSE	TRUE	FALSE	TRUE	TRUE	TRUE	TRUE	TRUE	TRUE
SE	ENSG00000221988,ENSG00000258388	PPT2,XXbac-BPG300A18.12	chr6:32122364:32122554:+@chr6:32122807:32122960:+@chr6:32123545:32123560:+	0.17	0.15	0.51	0.62	0.23	0.15	0.23	0.17	0.0386593	0.267702	0.169062	0.0197692	0.0259436	0.1606	0.5685	0.1955	0.2075	-0.4079	-0.0349	-0.0469	0.373	0.361	0.4079	0.0349	0.0469	0.373	0.361	TRUE	FALSE	FALSE	TRUE	TRUE	TRUE	TRUE	TRUE	TRUE	TRUE	TRUE	TRUE	TRUE
SE	ENSG00000204348	DOM3Z	chr6:31939706:31940032:-@chr6:31939097:31939458:-@chr6:31938689:31938924:-	0.98	0.96	0.9	0.92	0.94	0.94	0.98	0.97	0.0304696	0.124704	0.222367	0.100575	0.0304191	0.9706	0.9135	0.9455	0.9825	0.0571	0.0251	-0.0119	-0.032	-0.069	0.0571	0.0251	0.0119	0.032	0.069	TRUE	FALSE	FALSE	FALSE	TRUE	TRUE	TRUE	TRUE	TRUE	TRUE	TRUE	TRUE	TRUE
SE	ENSG00000164465	DCBLD1	chr6:117842688:117842739:+@chr6:117846525:117846597:+@chr6:117853423:117853556:+	0.77	0.76	0.65	0.67	0.64	0.73	0.78	0.76	0.0148134	0.171874	0.207098	0.329301	0.00775992	0.7656	0.6635	0.6905	0.7775	0.1021	0.0751	-0.0119	-0.027	-0.114	0.1021	0.0751	0.0119	0.027	0.114	TRUE	FALSE	FALSE	FALSE	TRUE	TRUE	TRUE	TRUE	TRUE	TRUE	TRUE	TRUE	TRUE
SE	ENSG00000112759	SLC29A1	chr6:44187242:44187519:+@chr6:44194997:44195079:+@chr6:44197127:44197208:+	0.64	0.61	0.81	0.76	0.78	0.55	0.67	0.74	0.0218477	0.381119	0.105001	0.243052	0.117815	0.6256	0.7885	0.6705	0.7125	-0.1629	-0.0449	-0.0869	0.118	0.076	0.1629	0.0449	0.0869	0.118	0.076	TRUE	FALSE	FALSE	FALSE	FALSE	TRUE	FALSE	TRUE	TRUE	TRUE	TRUE	TRUE	TRUE
SE	ENSG00000183137	CEP57L1	chr6:109446194:109446234:+@chr6:109466422:109466584:+@chr6:109467961:109468140:+	0.75	0.74	0.5	0.44	0.27	0.52	0.56	0.32	0.0305658	0.110748	0.121062	0.332127	0.432259	0.7456	0.4735	0.4005	0.4475	0.2721	0.3451	0.2981	0.073	0.026	0.2721	0.3451	0.2981	0.073	0.026	TRUE	FALSE	FALSE	FALSE	FALSE	TRUE	FALSE	TRUE	TRUE	TRUE	TRUE	TRUE	TRUE
SE	ENSG00000204314	PRRT1	chr6:32121514:32121613:-@chr6:32120749:32120949:-@chr6:32119872:32119952:-	0.61	0.6	0.56	0.54	0.47	0.55	0.45	0.58	0.0317921	0.132095	0.211937	0.258153	0.359306	0.6056	0.5535	0.5155	0.5225	0.0521	0.0901	0.0831	0.038	0.031	0.0521	0.0901	0.0831	0.038	0.031	TRUE	FALSE	FALSE	FALSE	FALSE	TRUE	FALSE	TRUE	TRUE	TRUE	TRUE	TRUE	TRUE
SE	ENSG00000152894	PTPRK	chr6:128324342:128324377:-@chr6:128322341:128322352:-@chr6:128319865:128320049:-	0.15	0.22	0.32	0.41	0.37	0.27	0.26	0.32	0.0466464	0.0806013	0.0690145	0.294175	0.169914	0.1856	0.3685	0.3255	0.2975	-0.1829	-0.1399	-0.1119	0.043	0.071	0.1829	0.1399	0.1119	0.043	0.071	TRUE	FALSE	FALSE	FALSE	FALSE	TRUE	FALSE	TRUE	TRUE	TRUE	TRUE	TRUE	TRUE
SE	ENSG00000124813	RUNX2	chr6:45479983:45480144:+@chr6:45481187:45481390:+@chr6:45630852:45632086:+	0.36	0.39	0.54	0.5	0.35	0.42	0.16	0.32	0.0155842	0.375457	0.175339	0.0565772	0.0821951	0.3756	0.5235	0.3905	0.2475	-0.1479	-0.0149	0.1281	0.133	0.276	0.1479	0.0149	0.1281	0.133	0.276	TRUE	FALSE	FALSE	FALSE	FALSE	TRUE	FALSE	TRUE	TRUE	TRUE	TRUE	TRUE	TRUE
SE	ENSG00000137221	TJAP1	chr6:43445825:43445970:+@chr6:43446397:43446456:+@chr6:43465619:43465715:+	0.4	0.42	0.5	0.53	0.34	0.37	0.39	0.26	0.020524	0.0672102	0.218183	0.00935463	0.0984211	0.4106	0.5185	0.3605	0.3325	-0.1079	0.0501	0.0781	0.158	0.186	0.1079	0.0501	0.0781	0.158	0.186	TRUE	FALSE	FALSE	TRUE	FALSE	TRUE	TRUE	TRUE	TRUE	TRUE	TRUE	TRUE	TRUE
SE	ENSG00000188428,ENSG00000265818,ENSG00000259040	MUTED,EEF1E1-MUTED,MUTED-TXNDC5	chr6:8062767:8062849:-@chr6:8041372:8041501:-@chr6:8026600:8026658:-	0.43	0.44	0.57	0.57	0.57	0.47	0.65	0.49	0.00990045	0.159184	0.162158	0.254892	0.483998	0.4356	0.5735	0.5255	0.5775	-0.1379	-0.0899	-0.1419	0.048	-0.004	0.1379	0.0899	0.1419	0.048	0.004	TRUE	FALSE	FALSE	FALSE	FALSE	TRUE	FALSE	TRUE	TRUE	TRUE	TRUE	TRUE	TRUE
SE	ENSG00000118518,ENSG00000260527	RNF146,RP11-73O6.4	chr6:127601376:127601485:+@chr6:127607195:127607322:+@chr6:127607761:127609705:+	0.31	0.25	0.43	0.39	0.2	0.32	0.49	0.33	0.0421894	0.425229	0.155648	0.111382	0.484127	0.2806	0.4135	0.2655	0.4175	-0.1329	0.0151	-0.1369	0.148	-0.004	0.1329	0.0151	0.1369	0.148	0.004	TRUE	FALSE	FALSE	FALSE	FALSE	TRUE	FALSE	TRUE	TRUE	TRUE	TRUE	TRUE	TRUE
SE	ENSG00000112367	FIG4	chr6:110056353:110056501:+@chr6:110064313:110064475:+@chr6:110064878:110064975:+	0.7	0.68	0.63	0.61	0.56	0.61	0.68	0.73	0.0210059	0.0606349	0.272026	0.201966	0.0723134	0.6906	0.6235	0.5905	0.7125	0.0671	0.1001	-0.0219	0.033	-0.089	0.0671	0.1001	0.0219	0.033	0.089	TRUE	FALSE	FALSE	FALSE	FALSE	TRUE	FALSE	TRUE	TRUE	TRUE	TRUE	TRUE	TRUE
SE	ENSG00000164663	USP49	chr6:41861671:41862193:-@chr6:41859532:41859613:-@chr6:41839302:41839375:-	0.7	0.67	0.29	0.32	0.79	0.47	0.54	0.49	0.00167051	0.403176	0.0218042	0.143231	0.0138937	0.6856	0.3085	0.6355	0.5225	0.3771	0.0501	0.1631	-0.327	-0.214	0.3771	0.0501	0.1631	0.327	0.214	TRUE	FALSE	TRUE	FALSE	TRUE	TRUE	TRUE	FALSE	TRUE	FALSE	TRUE	TRUE	FALSE
SE	ENSG00000135596	MICAL1	chr6:109772803:109772903:-@chr6:109771503:109771760:-@chr6:109771173:109771288:-	0.74	0.75	0.58	0.61	0.58	0.64	0.7	0.72	0.0247015	0.0699372	0.0943757	0.341437	0.0162377	0.7456	0.5985	0.6155	0.7175	0.1471	0.1301	0.0281	-0.017	-0.119	0.1471	0.1301	0.0281	0.017	0.119	TRUE	FALSE	FALSE	FALSE	TRUE	TRUE	TRUE	TRUE	TRUE	TRUE	TRUE	TRUE	TRUE
SE	NA	NA	chr6:110113785:110113867:+@chr6:110117968:110118054:+@chr6:110146291:110146634:+	0.88	0.89	0.84	0.82	0.61	0.5	0.72	0.83	0.0355705	0.0518554	0.156356	0.05841	0.262315	0.8856	0.8335	0.5605	0.7825	0.0521	0.3251	0.1031	0.273	0.051	0.0521	0.3251	0.1031	0.273	0.051	TRUE	FALSE	FALSE	FALSE	FALSE	TRUE	FALSE	TRUE	TRUE	TRUE	TRUE	TRUE	TRUE
SE	ENSG00000204623	ZNRD1-AS1	chr6:30025892:30025967:-@chr6:29989444:29989538:-@chr6:29968788:29970509:-	0.46	0.43	0.35	0.36	0.48	0.46	0.33	0.48	0.0412618	0.132166	0.368645	0.00886357	0.302259	0.4456	0.3585	0.4755	0.4125	0.0871	-0.0299	0.0331	-0.117	-0.054	0.0871	0.0299	0.0331	0.117	0.054	TRUE	FALSE	FALSE	TRUE	FALSE	TRUE	TRUE	TRUE	TRUE	TRUE	TRUE	TRUE	TRUE
SE	ENSG00000164506	STXBP5	chr6:147655293:147655358:+@chr6:147674459:147674509:+@chr6:147680220:147680459:+	0.86	0.88	0.91	0.93	0.74	0.94	0.87	0.92	0.033062	0.422151	0.20762	0.289625	0.279105	0.8706	0.9235	0.8455	0.9025	-0.0529	0.0251	-0.0319	0.078	0.021	0.0529	0.0251	0.0319	0.078	0.021	TRUE	FALSE	FALSE	FALSE	FALSE	TRUE	FALSE	TRUE	TRUE	TRUE	TRUE	TRUE	TRUE
SE	NA	NA	chr6:97285144:97285353:-@chr6:97279657:97279774:-@chr6:97241998:97247757:-	0.18	0.2	0.1	0.07	0.2	0.1	0.13	0.09	0.0191169	0.303072	0.0592531	0.196631	0.181788	0.1906	0.0885	0.1555	0.1175	0.1021	0.0351	0.0731	-0.067	-0.029	0.1021	0.0351	0.0731	0.067	0.029	TRUE	FALSE	FALSE	FALSE	FALSE	TRUE	FALSE	TRUE	TRUE	TRUE	TRUE	TRUE	TRUE
SE	ENSG00000112561	TFEB	chr6:41658739:41658973:-@chr6:41658401:41658655:-@chr6:41657469:41657549:-	0.9	0.92	0.85	0.86	0.71	0.89	0.82	0.89	0.0321269	0.225525	0.197142	0.33133	0.464383	0.9106	0.8585	0.8055	0.8625	0.0521	0.1051	0.0481	0.053	-0.004	0.0521	0.1051	0.0481	0.053	0.004	TRUE	FALSE	FALSE	FALSE	FALSE	TRUE	FALSE	TRUE	TRUE	TRUE	TRUE	TRUE	TRUE
SE	NA	NA	chr6:79607546:79607676:+@chr6:79607781:79608015:+@chr6:79612709:79612827:+	0.85	0.87	0.74	0.7	0.78	0.75	0.74	0.79	0.0247677	0.023545	0.0729289	0.101598	0.137292	0.8606	0.7235	0.7705	0.7725	0.1371	0.0901	0.0881	-0.047	-0.049	0.1371	0.0901	0.0881	0.047	0.049	TRUE	TRUE	FALSE	FALSE	FALSE	TRUE	FALSE	FALSE	TRUE	FALSE	TRUE	FALSE	TRUE
SE	ENSG00000010704	HFE	chr6:26087509:26087744:+@chr6:26092913:26093188:+@chr6:26093347:26093460:+	0.88	0.86	0.79	0.77	0.76	0.88	0.87	0.85	0.012834	0.295493	0.423189	0.306442	0.0123198	0.8706	0.7835	0.8255	0.8675	0.0871	0.0451	0.0031	-0.042	-0.084	0.0871	0.0451	0.0031	0.042	0.084	TRUE	FALSE	FALSE	FALSE	TRUE	TRUE	TRUE	TRUE	TRUE	TRUE	TRUE	TRUE	TRUE
SE	ENSG00000204580	DDR1	chr6:30850753:30850942:+@chr6:30852315:30852487:+@chr6:30856465:30856591:+	0.68	0.69	0.6	0.61	0.61	0.57	0.66	0.61	0.00474543	0.0602206	0.160704	0.31227	0.194755	0.6856	0.6085	0.5955	0.6425	0.0771	0.0901	0.0431	0.013	-0.034	0.0771	0.0901	0.0431	0.013	0.034	TRUE	FALSE	FALSE	FALSE	FALSE	TRUE	FALSE	TRUE	TRUE	TRUE	TRUE	TRUE	TRUE
SE	ENSG00000213066	FGFR1OP	chr6:167424301:167424381:+@chr6:167426996:167427055:+@chr6:167435897:167436123:+	0.39	0.39	0.33	0.34	0.18	0.17	0.41	0.24	0.032844	0.00646084	0.30827	0.00121444	0.477447	0.3906	0.3385	0.1805	0.3325	0.0521	0.2101	0.0581	0.158	0.006	0.0521	0.2101	0.0581	0.158	0.006	TRUE	TRUE	FALSE	TRUE	FALSE	TRUE	TRUE	FALSE	TRUE	FALSE	TRUE	FALSE	TRUE
SE	ENSG00000137312	FLOT1	chr6:30709569:30709644:-@chr6:30709391:30709481:-@chr6:30708967:30709110:-	0.91	0.89	0.84	0.81	0.76	0.91	0.91	0.87	0.032962	0.285481	0.452344	0.450035	0.0573248	0.9006	0.8285	0.8405	0.8975	0.0721	0.0601	0.0031	-0.012	-0.069	0.0721	0.0601	0.0031	0.012	0.069	TRUE	FALSE	FALSE	FALSE	FALSE	TRUE	FALSE	TRUE	TRUE	TRUE	TRUE	TRUE	TRUE
SE	ENSG00000213722	DDAH2	chr6:31696423:31696522:-@chr6:31696228:31696301:-@chr6:31695950:31696069:-	0.71	0.77	0.54	0.55	0.54	0.59	0.72	0.59	0.0441449	0.0254243	0.212341	0.272031	0.163046	0.7406	0.5485	0.5705	0.6625	0.1921	0.1701	0.0781	-0.022	-0.114	0.1921	0.1701	0.0781	0.022	0.114	TRUE	TRUE	FALSE	FALSE	FALSE	TRUE	FALSE	FALSE	TRUE	FALSE	TRUE	FALSE	TRUE
SE	NA	NA	chr6:33290639:33290793:-@chr6:33289496:33289685:-@chr6:33288513:33289344:-	0.69	0.69	0.6	0.58	0.76	0.72	0.66	0.82	0.0308367	0.108573	0.304144	0.0215978	0.151616	0.6906	0.5935	0.7455	0.7475	0.0971	-0.0549	-0.0569	-0.152	-0.154	0.0971	0.0549	0.0569	0.152	0.154	TRUE	FALSE	FALSE	TRUE	FALSE	TRUE	TRUE	TRUE	TRUE	TRUE	TRUE	TRUE	TRUE
SE	ENSG00000112425	EPM2A	chr6:146007258:146007432:-@chr6:145956381:145956622:-@chr6:145946440:145948829:-	0.83	0.85	0.9	0.91	0.69	0.93	0.76	0.91	0.0214131	0.434668	0.492007	0.290719	0.271138	0.8406	0.9085	0.8155	0.8425	-0.0679	0.0251	-0.0019	0.093	0.066	0.0679	0.0251	0.0019	0.093	0.066	TRUE	FALSE	FALSE	FALSE	FALSE	TRUE	FALSE	TRUE	TRUE	TRUE	TRUE	TRUE	TRUE
SE	ENSG00000235109	ZNF323	chr6:28303859:28304152:-@chr6:28297080:28297555:-@chr6:28295160:28295310:-	0.91	0.91	0.78	0.79	0.72	0.48	0.83	0.58	0.013932	0.118826	0.1786	0.183921	0.325525	0.9106	0.7885	0.6055	0.7125	0.1221	0.3051	0.1981	0.183	0.076	0.1221	0.3051	0.1981	0.183	0.076	TRUE	FALSE	FALSE	FALSE	FALSE	TRUE	FALSE	TRUE	TRUE	TRUE	TRUE	TRUE	TRUE
SE	ENSG00000124508	BTN2A2	chr6:26383324:26383527:+@chr6:26383881:26384143:+@chr6:26388241:26388522:+	0.09	0.16	0.37	0.33	0.46	0.31	0.33	0.34	0.0242317	0.0650929	0.0469408	0.353487	0.336532	0.1256	0.3535	0.3905	0.3425	-0.2279	-0.2649	-0.2169	-0.037	0.011	0.2279	0.2649	0.2169	0.037	0.011	TRUE	FALSE	TRUE	FALSE	FALSE	TRUE	FALSE	FALSE	TRUE	FALSE	TRUE	TRUE	FALSE
SE	ENSG00000096070	BRPF3	chr6:36189945:36190042:+@chr6:36193048:36193141:+@chr6:36196679:36196833:+	0.76	0.72	0.64	0.6	0.64	0.7	0.68	0.54	0.0268254	0.117981	0.155263	0.153676	0.472883	0.7406	0.6235	0.6755	0.6175	0.1171	0.0651	0.1231	-0.052	0.006	0.1171	0.0651	0.1231	0.052	0.006	TRUE	FALSE	FALSE	FALSE	FALSE	TRUE	FALSE	TRUE	TRUE	TRUE	TRUE	TRUE	TRUE
SE	ENSG00000186470	BTN3A2	chr6:26365398:26365580:+@chr6:26368218:26368278:+@chr6:26368793:26369140:+	0.78	0.78	0.9	0.9	0.9	0.82	0.8	0.78	2.07521e-05	0.138599	0.162799	0.256152	0.0281424	0.7806	0.9035	0.8655	0.7975	-0.1229	-0.0849	-0.0169	0.038	0.106	0.1229	0.0849	0.0169	0.038	0.106	TRUE	FALSE	FALSE	FALSE	TRUE	TRUE	TRUE	TRUE	TRUE	TRUE	TRUE	TRUE	TRUE
SE	ENSG00000111880	RNGTT	chr6:89554076:89554240:-@chr6:89511283:89511351:-@chr6:89479493:89479593:-	0.84	0.84	0.76	0.73	0.73	0.81	0.68	0.85	0.0495981	0.177137	0.285905	0.312566	0.413088	0.8406	0.7485	0.7755	0.7725	0.0921	0.0651	0.0681	-0.027	-0.024	0.0921	0.0651	0.0681	0.027	0.024	TRUE	FALSE	FALSE	FALSE	FALSE	TRUE	FALSE	TRUE	TRUE	TRUE	TRUE	TRUE	TRUE
SE	ENSG00000124508	BTN2A2	chr6:26383324:26383527:+@chr6:26384020:26384143:+@chr6:26388241:26388522:+	0.23	0.21	0.35	0.35	0.57	0.27	0.32	0.46	0.0246174	0.200212	0.117676	0.357135	0.322395	0.2206	0.3535	0.4255	0.3975	-0.1329	-0.2049	-0.1769	-0.072	-0.044	0.1329	0.2049	0.1769	0.072	0.044	TRUE	FALSE	FALSE	FALSE	FALSE	TRUE	FALSE	TRUE	TRUE	TRUE	TRUE	TRUE	TRUE
SE	ENSG00000226210	ABC7-42389800N19.1	chr12:87557:87703:+@chr12:87881:88017:+@chr12:88257:88392:+	0.78	0.78	0.66	0.62	0.56	0.66	0.58	0.67	0.0449145	0.0944768	0.0948673	0.339783	0.426467	0.7806	0.6435	0.6155	0.6325	0.1371	0.1651	0.1481	0.028	0.011	0.1371	0.1651	0.1481	0.028	0.011	TRUE	FALSE	FALSE	FALSE	FALSE	TRUE	FALSE	TRUE	TRUE	TRUE	TRUE	TRUE	TRUE
SE	ENSG00000139197	PEX5	chr12:7344165:7344296:+@chr12:7351607:7351709:+@chr12:7354347:7354437:+	0.87	0.87	0.81	0.82	0.65	0.84	0.8	0.8	0.032844	0.213836	7.4036e-05	0.302973	0.146528	0.8706	0.8185	0.7505	0.8075	0.0521	0.1201	0.0631	0.068	0.011	0.0521	0.1201	0.0631	0.068	0.011	TRUE	FALSE	TRUE	FALSE	FALSE	TRUE	FALSE	FALSE	TRUE	FALSE	TRUE	TRUE	FALSE
SE	ENSG00000090612	ZNF268	chr12:133764458:133764658:+@chr12:133768494:133768589:+@chr12:133778730:133783697:+	0.2	0.16	0.33	0.3	0.52	0.37	0.57	0.22	0.0195854	0.0756311	0.211056	0.159441	0.357188	0.1806	0.3185	0.4505	0.4025	-0.1379	-0.2699	-0.2219	-0.132	-0.084	0.1379	0.2699	0.2219	0.132	0.084	TRUE	FALSE	FALSE	FALSE	FALSE	TRUE	FALSE	TRUE	TRUE	TRUE	TRUE	TRUE	TRUE
SE	ENSG00000139178	C1RL	chr12:7261706:7261869:-@chr12:7260847:7261075:-@chr12:7254494:7254683:-	0.91	0.91	0.63	0.61	0.76	0.7	0.75	0.88	0.0104188	0.0531018	0.203496	0.0687727	0.0981181	0.9106	0.6235	0.7355	0.8225	0.2871	0.1751	0.0881	-0.112	-0.199	0.2871	0.1751	0.0881	0.112	0.199	TRUE	FALSE	FALSE	FALSE	FALSE	TRUE	FALSE	TRUE	TRUE	TRUE	TRUE	TRUE	TRUE
SE	ENSG00000179912,ENSG00000258830	R3HDM2,RP11-123K3.4	chr12:57686355:57686450:-@chr12:57682792:57682823:-@chr12:57677607:57677839:-	0.76	0.71	0.88	0.83	0.77	0.76	0.88	0.82	0.0368087	0.197666	0.0455568	0.0815112	0.490817	0.7356	0.8585	0.7705	0.8575	-0.1229	-0.0349	-0.1219	0.088	0.001	0.1229	0.0349	0.1219	0.088	0.001	TRUE	FALSE	TRUE	FALSE	FALSE	TRUE	FALSE	FALSE	TRUE	FALSE	TRUE	TRUE	FALSE
SE	ENSG00000182796	TMEM198B	chr12:56223744:56224867:+@chr12:56225041:56225133:+@chr12:56226743:56227325:+	0.64	0.75	0.38	0.47	0.58	0.45	0.45	0.74	0.0336594	0.0887546	0.318935	0.187644	0.216493	0.6956	0.4285	0.5205	0.6025	0.2671	0.1751	0.0931	-0.092	-0.174	0.2671	0.1751	0.0931	0.092	0.174	TRUE	FALSE	FALSE	FALSE	FALSE	TRUE	FALSE	TRUE	TRUE	TRUE	TRUE	TRUE	TRUE
SE	ENSG00000111271	ACAD10	chr12:112150302:112150461:+@chr12:112153625:112153766:+@chr12:112159475:112159543:+	0.76	0.78	0.69	0.71	0.38	0.75	0.69	0.68	0.0213934	0.237791	0.0211011	0.301933	0.237822	0.7706	0.7035	0.5705	0.6925	0.0671	0.2001	0.0781	0.133	0.011	0.0671	0.2001	0.0781	0.133	0.011	TRUE	FALSE	TRUE	FALSE	FALSE	TRUE	FALSE	FALSE	TRUE	FALSE	TRUE	TRUE	FALSE
SE	ENSG00000135446	CDK4	chr12:58145958:58146230:-@chr12:58145283:58145442:-@chr12:58144990:58145125:-	0.95	0.97	0.9	0.88	0.95	0.9	0.94	0.94	0.0191078	0.210445	0.201064	0.176059	0.0550282	0.9606	0.8935	0.9305	0.9475	0.0671	0.0301	0.0131	-0.037	-0.054	0.0671	0.0301	0.0131	0.037	0.054	TRUE	FALSE	FALSE	FALSE	FALSE	TRUE	FALSE	TRUE	TRUE	TRUE	TRUE	TRUE	TRUE
SE	ENSG00000127314	RAP1B	chr12:69004619:69004832:+@chr12:69018451:69018653:+@chr12:69042479:69042561:+	0.17	0.16	0.31	0.28	0.17	0.42	0.67	0.12	0.0220933	0.238402	0.273347	0.494936	0.384731	0.1656	0.2985	0.3005	0.4025	-0.1329	-0.1349	-0.2369	-0.002	-0.104	0.1329	0.1349	0.2369	0.002	0.104	TRUE	FALSE	FALSE	FALSE	FALSE	TRUE	FALSE	TRUE	TRUE	TRUE	TRUE	TRUE	TRUE
SE	ENSG00000013573	DDX11	chr12:31236747:31236995:+@chr12:31237903:31238060:+@chr12:31240872:31240917:+	0.15	0.13	0.26	0.22	0.16	0.22	0.14	0.17	0.0351562	0.150789	0.187956	0.167554	0.0442889	0.1406	0.2435	0.1955	0.1625	-0.1029	-0.0549	-0.0219	0.048	0.081	0.1029	0.0549	0.0219	0.048	0.081	TRUE	FALSE	FALSE	FALSE	TRUE	TRUE	TRUE	TRUE	TRUE	TRUE	TRUE	TRUE	TRUE
SE	ENSG00000028203	VEZT	chr12:95645716:95645847:+@chr12:95650930:95651015:+@chr12:95656682:95656857:+	0.6	0.57	0.83	0.87	0.74	0.66	0.77	0.52	0.00579651	0.083985	0.342988	0.0579464	0.173763	0.5856	0.8535	0.7055	0.6525	-0.2679	-0.1199	-0.0669	0.148	0.201	0.2679	0.1199	0.0669	0.148	0.201	TRUE	FALSE	FALSE	FALSE	FALSE	TRUE	FALSE	TRUE	TRUE	TRUE	TRUE	TRUE	TRUE
SE	ENSG00000090612	ZNF268	chr12:133758532:133758616:+@chr12:133768494:133768589:+@chr12:133778730:133783697:+	0.18	0.17	0.34	0.34	0.54	0.52	0.5	0.33	0.00972324	0.0015427	0.104345	0.0155151	0.260702	0.1756	0.3435	0.5355	0.4225	-0.1679	-0.3599	-0.2469	-0.192	-0.079	0.1679	0.3599	0.2469	0.192	0.079	TRUE	TRUE	FALSE	TRUE	FALSE	TRUE	TRUE	FALSE	TRUE	FALSE	TRUE	FALSE	TRUE
SE	ENSG00000196498	NCOR2	chr12:124815391:124815444:-@chr12:124811955:124812179:-@chr12:124810737:124810916:-	0.74	0.72	0.87	0.84	0.87	0.63	0.71	0.7	0.0122238	0.434654	0.152229	0.273048	0.0224383	0.7306	0.8585	0.7555	0.7125	-0.1279	-0.0249	0.0181	0.103	0.146	0.1279	0.0249	0.0181	0.103	0.146	TRUE	FALSE	FALSE	FALSE	TRUE	TRUE	TRUE	TRUE	TRUE	TRUE	TRUE	TRUE	TRUE
SE	ENSG00000197905	TEAD4	chr12:3103904:3104158:+@chr12:3120170:3120234:+@chr12:3121336:3121398:+	0.8	0.78	0.87	0.9	0.83	0.91	0.91	0.89	0.022725	0.134018	0.00727811	0.402759	0.212162	0.7906	0.8885	0.8755	0.9075	-0.0979	-0.0849	-0.1169	0.013	-0.019	0.0979	0.0849	0.1169	0.013	0.019	TRUE	FALSE	TRUE	FALSE	FALSE	TRUE	FALSE	FALSE	TRUE	FALSE	TRUE	TRUE	FALSE
SE	ENSG00000076248	UNG	chr12:109536994:109537089:+@chr12:109539707:109539804:+@chr12:109540644:109540732:+	0.8	0.82	0.71	0.7	0.72	0.69	0.75	0.71	0.0145033	0.0197602	0.0592531	0.456942	0.183825	0.8106	0.7085	0.7105	0.7375	0.1021	0.1001	0.0731	-0.002	-0.029	0.1021	0.1001	0.0731	0.002	0.029	TRUE	TRUE	FALSE	FALSE	FALSE	TRUE	FALSE	FALSE	TRUE	FALSE	TRUE	FALSE	TRUE
SE	ENSG00000110841	PPFIBP1	chr12:27835548:27835636:+@chr12:27840318:27840440:+@chr12:27841231:27841356:+	0.82	0.82	0.75	0.76	0.67	0.74	0.71	0.7	0.0275349	0.0992643	0.012684	0.200719	0.0126746	0.8206	0.7585	0.7105	0.7125	0.0621	0.1101	0.1081	0.048	0.046	0.0621	0.1101	0.1081	0.048	0.046	TRUE	FALSE	TRUE	FALSE	FALSE	TRUE	FALSE	FALSE	TRUE	FALSE	TRUE	TRUE	FALSE
SE	ENSG00000050426	LETMD1	chr12:51442817:51442968:+@chr12:51445875:51445990:+@chr12:51449618:51449804:+	0.41	0.45	0.6	0.59	0.35	0.31	0.28	0.4	0.0310558	0.0375619	0.193332	0.0188303	0.0744398	0.4306	0.5985	0.3355	0.3475	-0.1679	0.0951	0.0831	0.263	0.251	0.1679	0.0951	0.0831	0.263	0.251	TRUE	TRUE	FALSE	TRUE	FALSE	TRUE	TRUE	FALSE	TRUE	FALSE	TRUE	FALSE	TRUE
SE	ENSG00000173064	C12orf51	chr12:112717032:112717190:-@chr12:112712651:112712764:-@chr12:112711459:112711599:-	0.88	0.85	0.8	0.76	0.8	0.76	0.85	0.7	0.0432638	0.0450957	0.230243	0.474393	0.495768	0.8656	0.7835	0.7855	0.7825	0.0821	0.0801	0.0831	-0.002	0.001	0.0821	0.0801	0.0831	0.002	0.001	TRUE	TRUE	FALSE	FALSE	FALSE	TRUE	FALSE	FALSE	TRUE	FALSE	TRUE	FALSE	TRUE
SE	ENSG00000139323	POC1B	chr12:89885713:89885892:-@chr12:89861394:89861462:-@chr12:89860547:89860699:-	0.73	0.77	0.57	0.58	0.65	0.56	0.62	0.7	0.0278279	0.0773916	0.12608	0.301253	0.133494	0.7506	0.5785	0.6105	0.6675	0.1721	0.1401	0.0831	-0.032	-0.089	0.1721	0.1401	0.0831	0.032	0.089	TRUE	FALSE	FALSE	FALSE	FALSE	TRUE	FALSE	TRUE	TRUE	TRUE	TRUE	TRUE	TRUE
SE	ENSG00000028203	VEZT	chr12:95645716:95645847:+@chr12:95650926:95651015:+@chr12:95656682:95656857:+	0.71	0.68	0.87	0.94	0.87	0.82	0.9	0.59	0.0340282	0.0237026	0.387722	0.162398	0.246156	0.6956	0.9085	0.8505	0.7525	-0.2129	-0.1549	-0.0569	0.058	0.156	0.2129	0.1549	0.0569	0.058	0.156	TRUE	TRUE	FALSE	FALSE	FALSE	TRUE	FALSE	FALSE	TRUE	FALSE	TRUE	FALSE	TRUE
SE	ENSG00000111325,ENSG00000256028	OGFOD2,RP11-197N18.2	chr12:123461418:123461517:+@chr12:123462528:123462746:+@chr12:123462907:123463116:+	0.08	0.03	0.36	0.45	0.05	0.18	0.16	0.13	0.019042	0.247562	0.0542705	0.0407279	0.0438627	0.0556	0.4085	0.1205	0.1525	-0.3529	-0.0649	-0.0969	0.288	0.256	0.3529	0.0649	0.0969	0.288	0.256	TRUE	FALSE	FALSE	TRUE	TRUE	TRUE	TRUE	TRUE	TRUE	TRUE	TRUE	TRUE	TRUE
SE	ENSG00000257489	RP11-175P13.3	chr12:100593298:100593561:-@chr12:100592622:100592750:-@chr12:100574331:100574494:-	0.61	0.72	0.19	0.21	0.5	0.38	0.75	0.62	0.0330988	0.0566298	0.390567	0.0721921	0.0384119	0.6656	0.2035	0.4455	0.6925	0.4621	0.2201	-0.0269	-0.242	-0.489	0.4621	0.2201	0.0269	0.242	0.489	TRUE	FALSE	FALSE	FALSE	TRUE	TRUE	TRUE	TRUE	TRUE	TRUE	TRUE	TRUE	TRUE
SE	ENSG00000204954	C12orf73	chr12:104350409:104350526:-@chr12:104347192:104347312:-@chr12:104343981:104345408:-	0.34	0.29	0.52	0.61	0.59	0.59	0.48	0.7	0.031552	0.0287629	0.111939	0.329526	0.420158	0.3156	0.5685	0.5955	0.5975	-0.2529	-0.2799	-0.2819	-0.027	-0.029	0.2529	0.2799	0.2819	0.027	0.029	TRUE	TRUE	FALSE	FALSE	FALSE	TRUE	FALSE	FALSE	TRUE	FALSE	TRUE	FALSE	TRUE
SE	ENSG00000111231	GPN3	chr12:110906277:110906526:-@chr12:110905961:110906180:-@chr12:110902911:110903019:-	0.89	0.93	0.72	0.71	0.79	0.89	0.83	0.87	0.0267991	0.202312	0.101158	0.119329	0.0405756	0.9106	0.7185	0.8455	0.8575	0.1921	0.0651	0.0531	-0.127	-0.139	0.1921	0.0651	0.0531	0.127	0.139	TRUE	FALSE	FALSE	FALSE	TRUE	TRUE	TRUE	TRUE	TRUE	TRUE	TRUE	TRUE	TRUE
SE	ENSG00000213809,ENSG00000255819	KLRK1,RP11-277P12.7	chr12:10532299:10532391:-@chr12:10532046:10532081:-@chr12:10531153:10531304:-	0.6	0.64	0.76	0.72	0.66	0.79	0.85	0.8	0.0235333	0.162957	0.0119676	0.438313	0.0553206	0.6206	0.7435	0.7305	0.8325	-0.1229	-0.1099	-0.2119	0.013	-0.089	0.1229	0.1099	0.2119	0.013	0.089	TRUE	FALSE	TRUE	FALSE	FALSE	TRUE	FALSE	FALSE	TRUE	FALSE	TRUE	TRUE	FALSE
SE	ENSG00000150967	ABCB9	chr12:123428938:123429066:-@chr12:123425354:123425542:-@chr12:123424658:123424831:-	0.77	0.78	0.62	0.57	0.79	0.86	0.5	0.53	0.0393264	0.181037	0.0131062	0.0210976	0.0710191	0.7756	0.5985	0.8305	0.5225	0.1771	-0.0549	0.2531	-0.232	0.076	0.1771	0.0549	0.2531	0.232	0.076	TRUE	FALSE	TRUE	TRUE	FALSE	TRUE	TRUE	FALSE	TRUE	FALSE	TRUE	TRUE	FALSE
SE	ENSG00000256667	KLRAP1	chr12:10744879:10744985:-@chr12:10742614:10742764:-@chr12:10741077:10742144:-	0.13	0.12	0.41	0.4	0.14	0.24	0.21	0.14	0.000373791	0.198139	0.170932	0.0728899	0.0459148	0.1256	0.4085	0.1955	0.1825	-0.2829	-0.0699	-0.0569	0.213	0.226	0.2829	0.0699	0.0569	0.213	0.226	TRUE	FALSE	FALSE	FALSE	TRUE	TRUE	TRUE	TRUE	TRUE	TRUE	TRUE	TRUE	TRUE
SE	ENSG00000135454	B4GALNT1	chr12:58025698:58025916:-@chr12:58024983:58025147:-@chr12:58024763:58024869:-	0.9	0.91	0.71	0.66	0.66	0.6	0.8	0.62	0.0317038	0.0317941	0.141012	0.152442	0.400894	0.9056	0.6885	0.6355	0.7175	0.2171	0.2701	0.1881	0.053	-0.029	0.2171	0.2701	0.1881	0.053	0.029	TRUE	TRUE	FALSE	FALSE	FALSE	TRUE	FALSE	FALSE	TRUE	FALSE	TRUE	FALSE	TRUE
SE	ENSG00000111237	VPS29	chr12:110939854:110939916:-@chr12:110936625:110936664:-@chr12:110934103:110934807:-	0.07	0.11	0.28	0.3	0.39	0.44	0.13	0.18	0.0128485	0.00579337	0.0816167	0.0447417	0.043006	0.0906	0.2935	0.4205	0.1625	-0.2029	-0.3299	-0.0719	-0.127	0.131	0.2029	0.3299	0.0719	0.127	0.131	TRUE	TRUE	FALSE	TRUE	TRUE	TRUE	TRUE	FALSE	TRUE	FALSE	TRUE	FALSE	TRUE
SE	ENSG00000166986	MARS	chr12:57883050:57883128:+@chr12:57883207:57883341:+@chr12:57883990:57884162:+	0.49	0.54	0.71	0.69	0.73	0.7	0.61	0.53	0.0270518	0.0161301	0.167954	0.221959	0.0887155	0.5156	0.7035	0.7205	0.5775	-0.1879	-0.2049	-0.0619	-0.017	0.126	0.1879	0.2049	0.0619	0.017	0.126	TRUE	TRUE	FALSE	FALSE	FALSE	TRUE	FALSE	FALSE	TRUE	FALSE	TRUE	FALSE	TRUE
SE	ENSG00000185480	PARPBP	chr12:102576327:102576405:+@chr12:102589090:102589225:+@chr12:102589729:102591298:+	0.24	0.2	0.31	0.33	0.37	0.38	0.41	0.27	0.0384006	0.032245	0.150909	0.0341623	0.394293	0.2206	0.3235	0.3805	0.3475	-0.1029	-0.1599	-0.1269	-0.057	-0.024	0.1029	0.1599	0.1269	0.057	0.024	TRUE	TRUE	FALSE	TRUE	FALSE	TRUE	TRUE	FALSE	TRUE	FALSE	TRUE	FALSE	TRUE
SE	ENSG00000256223	ZNF10	chr12:133707197:133707340:+@chr12:133707423:133707600:+@chr12:133721020:133721111:+	0.54	0.55	0.71	0.75	0.55	0.77	0.72	0.66	0.029068	0.236914	0.0575864	0.32413	0.216296	0.5456	0.7335	0.6655	0.6975	-0.1879	-0.1199	-0.1519	0.068	0.036	0.1879	0.1199	0.1519	0.068	0.036	TRUE	FALSE	FALSE	FALSE	FALSE	TRUE	FALSE	TRUE	TRUE	TRUE	TRUE	TRUE	TRUE
SE	ENSG00000091039	OSBPL8	chr12:76881290:76881398:-@chr12:76853639:76853675:-@chr12:76844631:76844768:-	0.52	0.49	0.36	0.36	0.55	0.39	0.49	0.38	0.0342332	0.385007	0.22253	0.196485	0.192218	0.5056	0.3635	0.4755	0.4425	0.1421	0.0301	0.0631	-0.112	-0.079	0.1421	0.0301	0.0631	0.112	0.079	TRUE	FALSE	FALSE	FALSE	FALSE	TRUE	FALSE	TRUE	TRUE	TRUE	TRUE	TRUE	TRUE
SE	ENSG00000134283	PPHLN1	chr12:42729685:42729776:+@chr12:42745687:42745851:+@chr12:42748963:42749024:+	0.59	0.61	0.54	0.51	0.55	0.47	0.67	0.39	0.0339268	0.131238	0.364788	0.40024	0.479518	0.6006	0.5285	0.5155	0.5375	0.0721	0.0851	0.0631	0.013	-0.009	0.0721	0.0851	0.0631	0.013	0.009	TRUE	FALSE	FALSE	FALSE	FALSE	TRUE	FALSE	TRUE	TRUE	TRUE	TRUE	TRUE	TRUE
SE	ENSG00000167535	CACNB3	chr12:49212254:49212757:+@chr12:49213419:49213725:+@chr12:49217127:49217249:+	0.16	0.05	0.35	0.45	0.35	0.37	0.23	0.15	0.029345	0.0617461	0.160545	0.293835	0.045583	0.1056	0.4035	0.3655	0.1975	-0.2979	-0.2599	-0.0919	0.038	0.206	0.2979	0.2599	0.0919	0.038	0.206	TRUE	FALSE	FALSE	FALSE	TRUE	TRUE	TRUE	TRUE	TRUE	TRUE	TRUE	TRUE	TRUE
SE	ENSG00000134294	SLC38A2	chr12:46764559:46764640:-@chr12:46764295:46764410:-@chr12:46761050:46761123:-	0.71	0.71	0.64	0.65	0.65	0.66	0.59	0.68	0.0275349	0.0341588	0.187483	0.131423	0.458332	0.7106	0.6485	0.6605	0.6425	0.0621	0.0501	0.0681	-0.012	0.006	0.0621	0.0501	0.0681	0.012	0.006	TRUE	TRUE	FALSE	FALSE	FALSE	TRUE	FALSE	FALSE	TRUE	FALSE	TRUE	FALSE	TRUE
SE	ENSG00000050426	LETMD1	chr12:51442082:51442261:+@chr12:51442796:51442968:+@chr12:51450133:51450285:+	0.36	0.38	0.57	0.6	0.29	0.41	0.59	0.43	0.00648817	0.422313	0.156165	0.0718738	0.266658	0.3706	0.5885	0.3555	0.5175	-0.2179	0.0151	-0.1469	0.233	0.071	0.2179	0.0151	0.1469	0.233	0.071	TRUE	FALSE	FALSE	FALSE	FALSE	TRUE	FALSE	TRUE	TRUE	TRUE	TRUE	TRUE	TRUE
SE	ENSG00000089094	KDM2B	chr12:121881815:121882075:-@chr12:121881483:121881596:-@chr12:121880795:121880833:-	0.78	0.77	0.61	0.63	0.86	0.83	0.61	0.67	0.00821261	0.0451016	0.0698399	0.00433616	0.286308	0.7756	0.6235	0.8505	0.6475	0.1521	-0.0749	0.1281	-0.227	-0.024	0.1521	0.0749	0.1281	0.227	0.024	TRUE	TRUE	FALSE	TRUE	FALSE	TRUE	TRUE	FALSE	TRUE	FALSE	TRUE	FALSE	TRUE
SE	ENSG00000004700	RECQL	chr12:21654347:21654603:-@chr12:21654104:21654149:-@chr12:21652489:21652549:-	0.46	0.5	0.65	0.72	0.53	0.76	0.8	0.68	0.0294155	0.187423	0.0563466	0.399698	0.250509	0.4806	0.6885	0.6505	0.7475	-0.2079	-0.1699	-0.2669	0.038	-0.059	0.2079	0.1699	0.2669	0.038	0.059	TRUE	FALSE	FALSE	FALSE	FALSE	TRUE	FALSE	TRUE	TRUE	TRUE	TRUE	TRUE	TRUE
SE	ENSG00000090975	PITPNM2	chr12:123475092:123475256:-@chr12:123474334:123474495:-@chr12:123473271:123473419:-	0.23	0.2	0.5	0.51	0.25	0.4	0.4	0.4	0.00920536	0.18123	0.025378	0.126945	0.0166263	0.2156	0.5085	0.3305	0.4075	-0.2929	-0.1149	-0.1919	0.178	0.101	0.2929	0.1149	0.1919	0.178	0.101	TRUE	FALSE	TRUE	FALSE	TRUE	TRUE	TRUE	FALSE	TRUE	FALSE	TRUE	TRUE	FALSE
SE	ENSG00000060237	WNK1	chr12:987378:987527:+@chr12:989887:990165:+@chr12:990858:990955:+	0.41	0.39	0.46	0.48	0.55	0.34	0.56	0.29	0.0193666	0.358189	0.42591	0.431102	0.405852	0.4006	0.4735	0.4505	0.4325	-0.0729	-0.0499	-0.0319	0.023	0.041	0.0729	0.0499	0.0319	0.023	0.041	TRUE	FALSE	FALSE	FALSE	FALSE	TRUE	FALSE	TRUE	TRUE	TRUE	TRUE	TRUE	TRUE
SE	ENSG00000050426	LETMD1	chr12:51442817:51442968:+@chr12:51449927:51450028:+@chr12:51450133:51450285:+	0.43	0.49	0.27	0.3	0.49	0.36	0.51	0.48	0.0309383	0.363677	0.18494	0.128676	0.00491935	0.4606	0.2885	0.4305	0.5025	0.1721	0.0301	-0.0419	-0.142	-0.214	0.1721	0.0301	0.0419	0.142	0.214	TRUE	FALSE	FALSE	FALSE	TRUE	TRUE	TRUE	TRUE	TRUE	TRUE	TRUE	TRUE	TRUE
SE	ENSG00000121749	TBC1D15	chr12:72266709:72266783:+@chr12:72278591:72278801:+@chr12:72287002:72287104:+	0.63	0.63	0.53	0.55	0.56	0.59	0.72	0.69	0.0380021	0.0954031	0.0556657	0.101988	0.00737941	0.6306	0.5435	0.5805	0.7125	0.0871	0.0501	-0.0819	-0.037	-0.169	0.0871	0.0501	0.0819	0.037	0.169	TRUE	FALSE	FALSE	FALSE	TRUE	TRUE	TRUE	TRUE	TRUE	TRUE	TRUE	TRUE	TRUE
SE	ENSG00000111196	MAGOHB	chr12:10763221:10763279:-@chr12:10762430:10762540:-@chr12:10760453:10760535:-	0.49	0.47	0.61	0.57	0.48	0.55	0.44	0.4	0.0307044	0.227263	0.0879798	0.124033	0.013253	0.4806	0.5935	0.5205	0.4275	-0.1129	-0.0399	0.0531	0.073	0.166	0.1129	0.0399	0.0531	0.073	0.166	TRUE	FALSE	FALSE	FALSE	TRUE	TRUE	TRUE	TRUE	TRUE	TRUE	TRUE	TRUE	TRUE
SE	ENSG00000139197	PEX5	chr12:7354347:7354437:+@chr12:7354837:7354947:+@chr12:7355208:7355300:+	0.71	0.71	0.65	0.64	0.64	0.69	0.59	0.6	0.0222467	0.180267	0.0157536	0.27241	0.0126746	0.7106	0.6485	0.6705	0.6025	0.0621	0.0401	0.1081	-0.022	0.046	0.0621	0.0401	0.1081	0.022	0.046	TRUE	FALSE	TRUE	FALSE	FALSE	TRUE	FALSE	FALSE	TRUE	FALSE	TRUE	TRUE	FALSE
SE	ENSG00000196498	NCOR2	chr12:124826369:124826620:-@chr12:124825148:124825297:-@chr12:124824840:124824989:-	0.76	0.8	0.64	0.64	0.53	0.6	0.64	0.48	0.0451104	0.0289561	0.105629	0.14405	0.257161	0.7806	0.6435	0.5705	0.5675	0.1371	0.2101	0.2131	0.073	0.076	0.1371	0.2101	0.2131	0.073	0.076	TRUE	TRUE	FALSE	FALSE	FALSE	TRUE	FALSE	FALSE	TRUE	FALSE	TRUE	FALSE	TRUE
SE	ENSG00000078246	TULP3	chr12:3040203:3040406:+@chr12:3042584:3042696:+@chr12:3043613:3043727:+	0.92	0.94	0.78	0.81	0.66	0.84	0.85	0.82	0.0147789	0.15045	0.0244368	0.358846	0.0872416	0.9306	0.7985	0.7555	0.8425	0.1321	0.1751	0.0881	0.043	-0.044	0.1321	0.1751	0.0881	0.043	0.044	TRUE	FALSE	TRUE	FALSE	FALSE	TRUE	FALSE	FALSE	TRUE	FALSE	TRUE	TRUE	FALSE
SE	ENSG00000127314	RAP1B	chr12:69004619:69004832:+@chr12:69015226:69015271:+@chr12:69018451:69018653:+	0.4	0.35	0.24	0.17	0.26	0.22	0.15	0.27	0.0342482	0.0309357	0.0980682	0.235316	0.455813	0.3756	0.2085	0.2455	0.2175	0.1671	0.1301	0.1581	-0.037	-0.009	0.1671	0.1301	0.1581	0.037	0.009	TRUE	TRUE	FALSE	FALSE	FALSE	TRUE	FALSE	FALSE	TRUE	FALSE	TRUE	FALSE	TRUE
SE	ENSG00000175203	DCTN2	chr12:57928839:57928937:-@chr12:57928075:57928235:-@chr12:57927021:57927086:-	0.63	0.64	0.54	0.55	0.58	0.5	0.61	0.56	0.00375565	0.129667	0.160704	0.475926	0.15634	0.6356	0.5485	0.5455	0.5925	0.0871	0.0901	0.0431	0.003	-0.044	0.0871	0.0901	0.0431	0.003	0.044	TRUE	FALSE	FALSE	FALSE	FALSE	TRUE	FALSE	TRUE	TRUE	TRUE	TRUE	TRUE	TRUE
SE	ENSG00000111325,ENSG00000256028	OGFOD2,RP11-197N18.2	chr12:123461418:123461517:+@chr12:123462528:123462604:+@chr12:123462907:123463116:+	0.07	0.06	0.39	0.32	0.15	0.1	0.11	0.08	0.0343687	0.108346	0.103829	0.0203752	0.0263097	0.0656	0.3585	0.1305	0.1025	-0.2929	-0.0649	-0.0369	0.228	0.256	0.2929	0.0649	0.0369	0.228	0.256	TRUE	FALSE	FALSE	TRUE	TRUE	TRUE	TRUE	TRUE	TRUE	TRUE	TRUE	TRUE	TRUE
SE	ENSG00000065357	DGKA	chr12:56330207:56330351:+@chr12:56330801:56330874:+@chr12:56331192:56331327:+	0.86	0.89	0.8	0.77	0.71	0.75	0.87	0.83	0.0257698	0.0191976	0.27008	0.0915922	0.0573248	0.8756	0.7885	0.7355	0.8575	0.0871	0.1401	0.0181	0.053	-0.069	0.0871	0.1401	0.0181	0.053	0.069	TRUE	TRUE	FALSE	FALSE	FALSE	TRUE	FALSE	FALSE	TRUE	FALSE	TRUE	FALSE	TRUE
SE	ENSG00000123094	RASSF8	chr12:26111964:26112081:+@chr12:26147970:26148063:+@chr12:26208212:26208379:+	0.33	0.2	0.65	0.57	0.33	0.31	0.52	0.36	0.032015	0.263128	0.111953	0.0364865	0.123179	0.2656	0.6135	0.3255	0.4475	-0.3479	-0.0599	-0.1819	0.288	0.166	0.3479	0.0599	0.1819	0.288	0.166	TRUE	FALSE	FALSE	TRUE	FALSE	TRUE	TRUE	TRUE	TRUE	TRUE	TRUE	TRUE	TRUE
SE	ENSG00000214063	TSPAN4	chr11:850288:850367:+@chr11:862550:862741:+@chr11:864437:864511:+	0.47	0.47	0.54	0.56	0.52	0.56	0.33	0.61	0.0399132	0.084979	0.48438	0.385523	0.342137	0.4706	0.5535	0.5455	0.4775	-0.0829	-0.0749	-0.0069	0.008	0.076	0.0829	0.0749	0.0069	0.008	0.076	TRUE	FALSE	FALSE	FALSE	FALSE	TRUE	FALSE	TRUE	TRUE	TRUE	TRUE	TRUE	TRUE
SE	ENSG00000196954	CASP4	chr11:104817810:104817919:-@chr11:104815475:104815578:-@chr11:104813594:104813700:-	0.65	0.65	0.8	0.84	0.54	0.76	0.8	0.76	0.0375166	0.485894	0.0449793	0.181976	0.165711	0.6506	0.8235	0.6555	0.7875	-0.1729	-0.0049	-0.1369	0.168	0.036	0.1729	0.0049	0.1369	0.168	0.036	TRUE	FALSE	TRUE	FALSE	FALSE	TRUE	FALSE	FALSE	TRUE	FALSE	TRUE	TRUE	FALSE
SE	NA	NA	chr11:63672258:63672515:+@chr11:63673560:63673586:+@chr11:63676349:63678492:+	0.42	0.41	0.32	0.32	0.34	0.33	0.25	0.35	0.0178941	0.0048242	0.137599	0.0804923	0.402335	0.4156	0.3235	0.3405	0.3075	0.0921	0.0751	0.1081	-0.017	0.016	0.0921	0.0751	0.1081	0.017	0.016	TRUE	TRUE	FALSE	FALSE	FALSE	TRUE	FALSE	FALSE	TRUE	FALSE	TRUE	FALSE	TRUE
SE	ENSG00000137713	PPP2R1B	chr11:111625223:111625293:-@chr11:111624167:111624301:-@chr11:111622883:111623056:-	0.77	0.76	0.88	0.85	0.87	0.55	0.85	0.86	0.0304399	0.403129	0.00313788	0.256234	0.37662	0.7656	0.8685	0.7155	0.8625	-0.1029	0.0501	-0.0969	0.153	0.006	0.1029	0.0501	0.0969	0.153	0.006	TRUE	FALSE	TRUE	FALSE	FALSE	TRUE	FALSE	FALSE	TRUE	FALSE	TRUE	TRUE	FALSE
SE	ENSG00000174851	YIF1A	chr11:66053172:66053229:-@chr11:66052852:66053007:-@chr11:66052344:66052437:-	0.62	0.59	0.47	0.48	0.49	0.47	0.63	0.33	0.0259716	0.0171399	0.286885	0.3013	0.480864	0.6056	0.4785	0.4855	0.4875	0.1271	0.1201	0.1181	-0.007	-0.009	0.1271	0.1201	0.1181	0.007	0.009	TRUE	TRUE	FALSE	FALSE	FALSE	TRUE	FALSE	FALSE	TRUE	FALSE	TRUE	FALSE	TRUE
SE	ENSG00000149761	NUDT22	chr11:63994107:63994604:+@chr11:63996719:63996816:+@chr11:63996950:63997043:+	0.23	0.25	0.19	0.18	0.33	0.19	0.2	0.2	0.0368951	0.390593	0.0894346	0.233452	0.0721607	0.2406	0.1885	0.2655	0.2075	0.0521	-0.0249	0.0331	-0.077	-0.019	0.0521	0.0249	0.0331	0.077	0.019	TRUE	FALSE	FALSE	FALSE	FALSE	TRUE	FALSE	TRUE	TRUE	TRUE	TRUE	TRUE	TRUE
SE	ENSG00000172613	RAD9A	chr11:67159423:67159549:+@chr11:67159632:67159702:+@chr11:67160125:67160253:+	0.82	0.82	0.72	0.72	0.74	0.76	0.81	0.7	3.25318e-05	0.0506951	0.239823	0.100575	0.302291	0.8206	0.7235	0.7555	0.7625	0.0971	0.0651	0.0581	-0.032	-0.039	0.0971	0.0651	0.0581	0.032	0.039	TRUE	FALSE	FALSE	FALSE	FALSE	TRUE	FALSE	TRUE	TRUE	TRUE	TRUE	TRUE	TRUE
SE	ENSG00000205531	NAP1L4	chr11:3013484:3013607:-@chr11:3000437:3000467:-@chr11:2999514:2999572:-	0.62	0.63	0.72	0.71	0.63	0.75	0.74	0.52	0.0023866	0.2267	0.465549	0.384382	0.29723	0.6256	0.7185	0.6955	0.6375	-0.0929	-0.0699	-0.0119	0.023	0.081	0.0929	0.0699	0.0119	0.023	0.081	TRUE	FALSE	FALSE	FALSE	FALSE	TRUE	FALSE	TRUE	TRUE	TRUE	TRUE	TRUE	TRUE
SE	ENSG00000166435	XRRA1	chr11:74617284:74617501:-@chr11:74570203:74570328:-@chr11:74563034:74563127:-	0.07	0.06	0.39	0.32	0.12	0.08	0.07	0.17	0.0343687	0.136137	0.216981	0.0205052	0.0383804	0.0656	0.3585	0.1055	0.1275	-0.2929	-0.0399	-0.0619	0.253	0.231	0.2929	0.0399	0.0619	0.253	0.231	TRUE	FALSE	FALSE	TRUE	TRUE	TRUE	TRUE	TRUE	TRUE	TRUE	TRUE	TRUE	TRUE
SE	ENSG00000162298	SYVN1	chr11:64900393:64900545:-@chr11:64899719:64900251:-@chr11:64898941:64899067:-	0.74	0.76	0.65	0.66	0.6	0.74	0.77	0.75	0.0133203	0.238907	0.168679	0.424719	0.00991683	0.7506	0.6585	0.6755	0.7675	0.0921	0.0751	-0.0169	-0.017	-0.109	0.0921	0.0751	0.0169	0.017	0.109	TRUE	FALSE	FALSE	FALSE	TRUE	TRUE	TRUE	TRUE	TRUE	TRUE	TRUE	TRUE	TRUE
SE	ENSG00000130413	STK33	chr11:8498797:8498830:-@chr11:8498234:8498298:-@chr11:8496228:8496613:-	0.26	0.36	0.58	0.48	0.45	0.36	0.3	0.63	0.0431199	0.136983	0.250433	0.103647	0.388368	0.3106	0.5335	0.4105	0.4725	-0.2229	-0.0999	-0.1619	0.123	0.061	0.2229	0.0999	0.1619	0.123	0.061	TRUE	FALSE	FALSE	FALSE	FALSE	TRUE	FALSE	TRUE	TRUE	TRUE	TRUE	TRUE	TRUE
SE	ENSG00000149743	TRPT1	chr11:63991757:63991813:-@chr11:63991572:63991634:-@chr11:63991271:63991439:-	0.76	0.65	0.5	0.4	0.58	0.52	0.74	0.42	0.0391501	0.088586	0.296111	0.123117	0.275654	0.7056	0.4535	0.5555	0.5875	0.2521	0.1501	0.1181	-0.102	-0.134	0.2521	0.1501	0.1181	0.102	0.134	TRUE	FALSE	FALSE	FALSE	FALSE	TRUE	FALSE	TRUE	TRUE	TRUE	TRUE	TRUE	TRUE
SE	ENSG00000137500	CCDC90B	chr11:82996596:82997394:-@chr11:82991184:82991303:-@chr11:82985682:82985783:-	0.96	0.95	0.85	0.86	0.78	0.8	0.93	0.87	0.00312509	0.00761052	0.171724	0.0295487	0.168922	0.9556	0.8585	0.7955	0.9075	0.0971	0.1601	0.0481	0.063	-0.049	0.0971	0.1601	0.0481	0.063	0.049	TRUE	TRUE	FALSE	TRUE	FALSE	TRUE	TRUE	FALSE	TRUE	FALSE	TRUE	FALSE	TRUE
SE	ENSG00000198561	CTNND1	chr11:57582866:57582972:+@chr11:57583387:57583473:+@chr11:57583769:57586652:+	0.03	0.05	0.11	0.08	0.05	0.02	0.06	0.04	0.0480954	0.498001	0.168679	0.0527864	0.0807313	0.0406	0.0985	0.0405	0.0575	-0.0579	0.0001	-0.0169	0.058	0.041	0.0579	0.0001	0.0169	0.058	0.041	TRUE	FALSE	FALSE	FALSE	FALSE	TRUE	FALSE	TRUE	TRUE	TRUE	TRUE	TRUE	TRUE
SE	ENSG00000023171	GRAMD1B	chr11:123448075:123448285:+@chr11:123449118:123449138:+@chr11:123455020:123455040:+	0.11	0.1	0.05	0.03	0.07	0.07	0.04	0.05	0.0243396	0.0552642	0.0102225	0.0914324	0.258116	0.1056	0.0435	0.0755	0.0525	0.0621	0.0301	0.0531	-0.032	-0.009	0.0621	0.0301	0.0531	0.032	0.009	TRUE	FALSE	TRUE	FALSE	FALSE	TRUE	FALSE	FALSE	TRUE	FALSE	TRUE	TRUE	FALSE
SE	ENSG00000078124	ACER3	chr11:76571917:76572123:+@chr11:76637601:76637711:+@chr11:76670023:76670075:+	0.82	0.8	0.9	0.89	0.75	0.86	0.86	0.8	0.0215874	0.499429	0.261844	0.178414	0.140442	0.8106	0.8985	0.8105	0.8375	-0.0879	0.0001	-0.0269	0.088	0.061	0.0879	0.0001	0.0269	0.088	0.061	TRUE	FALSE	FALSE	FALSE	FALSE	TRUE	FALSE	TRUE	TRUE	TRUE	TRUE	TRUE	TRUE
SE	ENSG00000162144	CYBASC3	chr11:61124002:61124200:-@chr11:61120428:61120611:-@chr11:61118463:61118619:-	0.07	0.07	0.12	0.12	0.08	0.19	0.07	0.07	0.000103639	0.213603	0.00499417	0.405388	0.000118106	0.0706	0.1235	0.1405	0.0775	-0.0529	-0.0699	-0.0069	-0.017	0.046	0.0529	0.0699	0.0069	0.017	0.046	TRUE	FALSE	FALSE	FALSE	FALSE	TRUE	FALSE	TRUE	TRUE	TRUE	TRUE	TRUE	TRUE
SE	ENSG00000149179	C11orf49	chr11:47176727:47176812:+@chr11:47178574:47178769:+@chr11:47179364:47179473:+	0.86	0.82	0.76	0.73	0.74	0.76	0.75	0.79	0.0387904	0.0501536	0.080431	0.368358	0.189261	0.8406	0.7485	0.7555	0.7775	0.0921	0.0851	0.0631	-0.007	-0.029	0.0921	0.0851	0.0631	0.007	0.029	TRUE	FALSE	FALSE	FALSE	FALSE	TRUE	FALSE	TRUE	TRUE	TRUE	TRUE	TRUE	TRUE
SE	ENSG00000137693	YAP1	chr11:102076624:102076817:+@chr11:102080248:102080295:+@chr11:102094353:102094483:+	0.42	0.42	0.24	0.25	0.32	0.2	0.31	0.29	0.00985196	0.116593	0.0264822	0.411466	0.0259445	0.4206	0.2485	0.2655	0.3075	0.1721	0.1551	0.1131	-0.017	-0.059	0.1721	0.1551	0.1131	0.017	0.059	TRUE	FALSE	TRUE	FALSE	TRUE	TRUE	TRUE	FALSE	TRUE	FALSE	TRUE	TRUE	FALSE
SE	ENSG00000173992	CCS	chr11:66360690:66360771:+@chr11:66361081:66361185:+@chr11:66366587:66366724:+	0.71	0.75	0.57	0.63	0.67	0.68	0.59	0.58	0.0454273	0.108833	0.0384334	0.115594	0.389938	0.7306	0.6035	0.6805	0.5925	0.1271	0.0501	0.1381	-0.077	0.011	0.1271	0.0501	0.1381	0.077	0.011	TRUE	FALSE	TRUE	FALSE	FALSE	TRUE	FALSE	FALSE	TRUE	FALSE	TRUE	TRUE	FALSE
SE	ENSG00000109920	FNBP4	chr11:47745580:47745724:-@chr11:47744528:47744868:-@chr11:47741481:47741638:-	0.91	0.9	0.95	0.96	0.88	0.93	0.91	0.96	0.0102975	0.439865	0.188652	0.150224	0.32128	0.9056	0.9585	0.9105	0.9425	-0.0529	-0.0049	-0.0369	0.048	0.016	0.0529	0.0049	0.0369	0.048	0.016	TRUE	FALSE	FALSE	FALSE	FALSE	TRUE	FALSE	TRUE	TRUE	TRUE	TRUE	TRUE	TRUE
SE	ENSG00000124942	AHNAK	chr11:62303941:62304039:-@chr11:62303711:62303759:-@chr11:62303417:62303570:-	0.09	0.09	0.03	0.02	0.09	0.04	0.05	0.08	0.0222467	0.281293	0.225371	0.164502	0.097008	0.0906	0.0285	0.0705	0.0725	0.0621	0.0201	0.0181	-0.042	-0.044	0.0621	0.0201	0.0181	0.042	0.044	TRUE	FALSE	FALSE	FALSE	FALSE	TRUE	FALSE	TRUE	TRUE	TRUE	TRUE	TRUE	TRUE
SE	ENSG00000109920	FNBP4	chr11:47754089:47754222:-@chr11:47753669:47753771:-@chr11:47752926:47753113:-	0.23	0.22	0.15	0.15	0.36	0.27	0.23	0.17	0.0229366	0.137639	0.32456	0.0828733	0.159118	0.2256	0.1535	0.3205	0.2075	0.0721	-0.0949	0.0181	-0.167	-0.054	0.0721	0.0949	0.0181	0.167	0.054	TRUE	FALSE	FALSE	FALSE	FALSE	TRUE	FALSE	TRUE	TRUE	TRUE	TRUE	TRUE	TRUE
SE	ENSG00000132740	IGHMBP2	chr11:68696651:68696825:+@chr11:68697791:68697902:+@chr11:68700767:68700949:+	0.02	0.03	0.09	0.1	0.11	0.26	0.05	0.1	0.0052825	0.136166	0.129895	0.218349	0.32128	0.0256	0.0985	0.1905	0.0825	-0.0729	-0.1649	-0.0569	-0.092	0.016	0.0729	0.1649	0.0569	0.092	0.016	TRUE	FALSE	FALSE	FALSE	FALSE	TRUE	FALSE	TRUE	TRUE	TRUE	TRUE	TRUE	TRUE
SE	ENSG00000020922	MRE11A	chr11:94180385:94180604:-@chr11:94178976:94179056:-@chr11:94170343:94170401:-	0.09	0.08	0.17	0.17	0.19	0.13	0.16	0.09	0.0187619	0.107893	0.199846	0.415708	0.222648	0.0856	0.1735	0.1655	0.1325	-0.0879	-0.0799	-0.0469	0.008	0.041	0.0879	0.0799	0.0469	0.008	0.041	TRUE	FALSE	FALSE	FALSE	FALSE	TRUE	FALSE	TRUE	TRUE	TRUE	TRUE	TRUE	TRUE
SE	ENSG00000166435	XRRA1	chr11:74617284:74617501:-@chr11:74574026:74574066:-@chr11:74563034:74563127:-	0.17	0.19	0.34	0.31	0.27	0.11	0.11	0.16	0.0102131	0.44111	0.178124	0.168033	0.0205595	0.1806	0.3285	0.1955	0.1425	-0.1479	-0.0149	0.0381	0.133	0.186	0.1479	0.0149	0.0381	0.133	0.186	TRUE	FALSE	FALSE	FALSE	TRUE	TRUE	TRUE	TRUE	TRUE	TRUE	TRUE	TRUE	TRUE
SE	ENSG00000166452	AKIP1	chr11:8936373:8936477:+@chr11:8938834:8938914:+@chr11:8940884:8941626:+	0.89	0.93	0.77	0.82	0.81	0.88	0.85	0.8	0.0401761	0.154307	0.0682404	0.183327	0.218953	0.9106	0.7985	0.8505	0.8325	0.1121	0.0601	0.0781	-0.052	-0.034	0.1121	0.0601	0.0781	0.052	0.034	TRUE	FALSE	FALSE	FALSE	FALSE	TRUE	FALSE	TRUE	TRUE	TRUE	TRUE	TRUE	TRUE
SE	ENSG00000149428	HYOU1	chr11:118926782:118926879:-@chr11:118926462:118926555:-@chr11:118926205:118926283:-	0.76	0.75	0.69	0.71	0.74	0.8	0.72	0.73	0.0393271	0.315626	0.0478355	0.114345	0.0867561	0.7556	0.7035	0.7755	0.7325	0.0521	-0.0199	0.0231	-0.072	-0.029	0.0521	0.0199	0.0231	0.072	0.029	TRUE	FALSE	FALSE	FALSE	FALSE	TRUE	FALSE	TRUE	TRUE	TRUE	TRUE	TRUE	TRUE
SE	ENSG00000130413	STK33	chr11:8457041:8457126:-@chr11:8435042:8435239:-@chr11:8413418:8414257:-	0.74	0.77	0.82	0.8	0.8	0.86	0.88	0.85	0.0488544	0.0947478	0.0148087	0.300167	0.0468462	0.7556	0.8135	0.8355	0.8725	-0.0579	-0.0799	-0.1169	-0.022	-0.059	0.0579	0.0799	0.1169	0.022	0.059	TRUE	FALSE	TRUE	FALSE	TRUE	TRUE	TRUE	FALSE	TRUE	FALSE	TRUE	TRUE	FALSE
SE	ENSG00000005801	ZNF195	chr11:3392205:3392300:-@chr11:3390022:3390085:-@chr11:3388074:3388287:-	0.52	0.48	0.33	0.34	0.41	0.41	0.43	0.47	0.0317512	0.0747985	0.137313	0.0218903	0.0452641	0.5006	0.3385	0.4155	0.4575	0.1621	0.0851	0.0431	-0.077	-0.119	0.1621	0.0851	0.0431	0.077	0.119	TRUE	FALSE	FALSE	TRUE	TRUE	TRUE	TRUE	TRUE	TRUE	TRUE	TRUE	TRUE	TRUE
SE	ENSG00000184154	LRTOMT	chr11:71799343:71799426:+@chr11:71800075:71800211:+@chr11:71804542:71804747:+	0.73	0.76	0.63	0.59	0.63	0.66	0.65	0.77	0.0190544	0.0234799	0.361822	0.14087	0.158376	0.7456	0.6135	0.6505	0.7175	0.1321	0.0951	0.0281	-0.037	-0.104	0.1321	0.0951	0.0281	0.037	0.104	TRUE	TRUE	FALSE	FALSE	FALSE	TRUE	FALSE	FALSE	TRUE	FALSE	TRUE	FALSE	TRUE
SE	ENSG00000149716	ORAOV1	chr11:69489958:69490165:-@chr11:69489319:69489534:-@chr11:69486517:69486587:-	0.04	0.06	0.13	0.1	0.09	0.11	0.1	0.07	0.0373712	0.0309238	0.0782018	0.274762	0.166227	0.0506	0.1185	0.1055	0.0925	-0.0679	-0.0549	-0.0419	0.013	0.026	0.0679	0.0549	0.0419	0.013	0.026	TRUE	TRUE	FALSE	FALSE	FALSE	TRUE	FALSE	FALSE	TRUE	FALSE	TRUE	FALSE	TRUE
SE	ENSG00000162194	C11orf48	chr11:62439036:62439241:-@chr11:62437354:62437487:-@chr11:62434995:62435219:-	0.2	0.22	0.12	0.09	0.29	0.17	0.22	0.09	0.0191169	0.373936	0.295562	0.132381	0.276794	0.2106	0.1085	0.2355	0.1625	0.1021	-0.0249	0.0481	-0.127	-0.054	0.1021	0.0249	0.0481	0.127	0.054	TRUE	FALSE	FALSE	FALSE	FALSE	TRUE	FALSE	TRUE	TRUE	TRUE	TRUE	TRUE	TRUE
SE	ENSG00000132749	MTL5	chr11:68512459:68512579:-@chr11:68509786:68509862:-@chr11:68503600:68506256:-	0.5	0.53	0.29	0.28	0.4	0.38	0.35	0.45	0.0134812	0.0149451	0.129636	0.0132133	0.126638	0.5156	0.2885	0.3955	0.4075	0.2271	0.1201	0.1081	-0.107	-0.119	0.2271	0.1201	0.1081	0.107	0.119	TRUE	TRUE	FALSE	TRUE	FALSE	TRUE	TRUE	FALSE	TRUE	FALSE	TRUE	FALSE	TRUE
SE	ENSG00000173039	RELA	chr11:65429650:65429676:-@chr11:65429408:65429559:-@chr11:65429158:65429306:-	0.73	0.76	0.62	0.62	0.73	0.76	0.75	0.66	0.0377317	0.419731	0.295336	0.0385234	0.147567	0.7456	0.6235	0.7505	0.7125	0.1221	-0.0049	0.0331	-0.127	-0.089	0.1221	0.0049	0.0331	0.127	0.089	TRUE	FALSE	FALSE	TRUE	FALSE	TRUE	TRUE	TRUE	TRUE	TRUE	TRUE	TRUE	TRUE
SE	ENSG00000166311	SMPD1	chr11:6412614:6413426:+@chr11:6414446:6414617:+@chr11:6414847:6414923:+	0.58	0.55	0.45	0.4	0.54	0.56	0.49	0.53	0.0288379	0.324225	0.105605	0.0415251	0.0560039	0.5656	0.4285	0.5555	0.5175	0.1371	0.0101	0.0481	-0.127	-0.089	0.1371	0.0101	0.0481	0.127	0.089	TRUE	FALSE	FALSE	TRUE	FALSE	TRUE	TRUE	TRUE	TRUE	TRUE	TRUE	TRUE	TRUE
SE	ENSG00000110536,ENSG00000213619	PTPMT1,NDUFS3	chr11:47587458:47587538:+@chr11:47591252:47591443:+@chr11:47593023:47595013:+	0.8	0.84	0.65	0.69	0.75	0.66	0.71	0.69	0.0176859	0.103373	0.033119	0.278055	0.158943	0.8206	0.6735	0.7105	0.7075	0.1471	0.1101	0.1131	-0.037	-0.034	0.1471	0.1101	0.1131	0.037	0.034	TRUE	FALSE	TRUE	FALSE	FALSE	TRUE	FALSE	FALSE	TRUE	FALSE	TRUE	TRUE	FALSE
SE	ENSG00000173914	RBM4B	chr11:66436086:66436762:-@chr11:66433743:66433964:-@chr11:66432470:66433049:-	0.22	0.27	0.15	0.09	0.43	0.2	0.18	0.35	0.0449701	0.315154	0.403705	0.161039	0.155375	0.2456	0.1235	0.3205	0.2725	0.1221	-0.0749	-0.0269	-0.197	-0.149	0.1221	0.0749	0.0269	0.197	0.149	TRUE	FALSE	FALSE	FALSE	FALSE	TRUE	FALSE	TRUE	TRUE	TRUE	TRUE	TRUE	TRUE
SE	ENSG00000258529,ENSG00000086848	RP11-108O10.8,ALG9	chr11:111742075:111742305:-@chr11:111740951:111741093:-@chr11:111739325:111739459:-	0.76	0.77	0.88	0.89	0.75	0.87	0.88	0.83	0.00193518	0.280282	0.0737123	0.219681	0.238061	0.7656	0.8885	0.8155	0.8625	-0.1229	-0.0499	-0.0969	0.073	0.026	0.1229	0.0499	0.0969	0.073	0.026	TRUE	FALSE	FALSE	FALSE	FALSE	TRUE	FALSE	TRUE	TRUE	TRUE	TRUE	TRUE	TRUE
SE	NA	NA	chr11:65305438:65305653:+@chr11:65305741:65305795:+@chr11:65305913:65306182:+	0.94	0.95	0.89	0.87	0.95	0.89	0.95	0.88	0.0278408	0.309255	0.311934	0.187588	0.226651	0.9456	0.8835	0.9255	0.9225	0.0621	0.0201	0.0231	-0.042	-0.039	0.0621	0.0201	0.0231	0.042	0.039	TRUE	FALSE	FALSE	FALSE	FALSE	TRUE	FALSE	TRUE	TRUE	TRUE	TRUE	TRUE	TRUE
SE	ENSG00000149582	TMEM25	chr11:118401803:118401949:+@chr11:118402490:118402586:+@chr11:118403632:118403922:+	0.3	0.28	0.23	0.22	0.18	0.17	0.11	0.42	0.0342852	0.0159478	0.463133	0.00856391	0.412231	0.2906	0.2285	0.1805	0.2725	0.0621	0.1101	0.0181	0.048	-0.044	0.0621	0.1101	0.0181	0.048	0.044	TRUE	TRUE	FALSE	FALSE	FALSE	TRUE	FALSE	FALSE	TRUE	FALSE	TRUE	FALSE	TRUE
SE	NA	NA	chr11:61100654:61100801:+@chr11:61101021:61101122:+@chr11:61102092:61102203:+	0.14	0.16	0.24	0.27	0.38	0.4	0.31	0.42	0.020524	0.00173851	0.0736278	0.0127604	0.135509	0.1506	0.2585	0.3955	0.3725	-0.1079	-0.2449	-0.2219	-0.137	-0.114	0.1079	0.2449	0.2219	0.137	0.114	TRUE	TRUE	FALSE	TRUE	FALSE	TRUE	TRUE	FALSE	TRUE	FALSE	TRUE	FALSE	TRUE
SE	ENSG00000166435	XRRA1	chr11:74659973:74660232:-@chr11:74656063:74656130:-@chr11:74651830:74651927:-	0.82	0.81	0.71	0.72	0.75	0.67	0.84	0.73	0.00312509	0.117	0.372413	0.475926	0.201183	0.8156	0.7185	0.7155	0.7925	0.0971	0.1001	0.0231	0.003	-0.074	0.0971	0.1001	0.0231	0.003	0.074	TRUE	FALSE	FALSE	FALSE	FALSE	TRUE	FALSE	TRUE	TRUE	TRUE	TRUE	TRUE	TRUE
SE	ENSG00000132256	TRIM5	chr11:5699434:5699664:-@chr11:5688919:5688941:-@chr11:5687211:5687311:-	0.84	0.87	0.74	0.75	0.76	0.57	0.82	0.77	0.0289773	0.147352	0.115736	0.280243	0.129334	0.8556	0.7485	0.6705	0.8025	0.1071	0.1851	0.0531	0.078	-0.054	0.1071	0.1851	0.0531	0.078	0.054	TRUE	FALSE	FALSE	FALSE	FALSE	TRUE	FALSE	TRUE	TRUE	TRUE	TRUE	TRUE	TRUE
SE	ENSG00000175224	ATG13	chr11:46638826:46639440:+@chr11:46651595:46651650:+@chr11:46665829:46665910:+	0.36	0.42	0.49	0.53	0.29	0.61	0.66	0.58	0.0447068	0.377847	0.0236078	0.389702	0.0821559	0.3906	0.5135	0.4555	0.6275	-0.1229	-0.0649	-0.2369	0.058	-0.114	0.1229	0.0649	0.2369	0.058	0.114	TRUE	FALSE	TRUE	FALSE	FALSE	TRUE	FALSE	FALSE	TRUE	FALSE	TRUE	TRUE	FALSE
SE	ENSG00000134802	SLC43A3	chr11:57193462:57193825:-@chr11:57193014:57193143:-@chr11:57191455:57191501:-	0.83	0.83	0.7	0.73	0.85	0.82	0.77	0.79	0.0436449	0.309299	0.0758403	0.0146265	0.0402101	0.8306	0.7185	0.8405	0.7875	0.1121	-0.0099	0.0431	-0.122	-0.069	0.1121	0.0099	0.0431	0.122	0.069	TRUE	FALSE	FALSE	TRUE	TRUE	TRUE	TRUE	TRUE	TRUE	TRUE	TRUE	TRUE	TRUE
SE	ENSG00000121236	TRIM6	chr11:5617865:5618144:+@chr11:5624838:5624965:+@chr11:5625764:5625859:+	0.2	0.15	0.29	0.35	0.25	0.5	0.3	0.51	0.0341788	0.170852	0.12622	0.364558	0.275085	0.1756	0.3235	0.3805	0.4125	-0.1479	-0.2049	-0.2369	-0.057	-0.089	0.1479	0.2049	0.2369	0.057	0.089	TRUE	FALSE	FALSE	FALSE	FALSE	TRUE	FALSE	TRUE	TRUE	TRUE	TRUE	TRUE	TRUE
SE	ENSG00000014216	CAPN1	chr11:64953388:64953521:+@chr11:64953641:64953809:+@chr11:64954686:64954769:+	0.95	0.93	0.89	0.88	0.84	0.89	0.92	0.93	0.0431686	0.0931248	0.290521	0.303838	0.0137661	0.9406	0.8885	0.8705	0.9325	0.0521	0.0701	0.0081	0.018	-0.044	0.0521	0.0701	0.0081	0.018	0.044	TRUE	FALSE	FALSE	FALSE	FALSE	TRUE	FALSE	TRUE	TRUE	TRUE	TRUE	TRUE	TRUE
SE	ENSG00000133318	RTN3	chr11:63448922:63449250:+@chr11:63472323:63472379:+@chr11:63486174:63488504:+	0.16	0.17	0.1	0.07	0.13	0.05	0.12	0.13	0.0469388	0.161774	0.0232393	0.445232	0.0846786	0.1656	0.0885	0.0955	0.1325	0.0771	0.0701	0.0331	-0.007	-0.044	0.0771	0.0701	0.0331	0.007	0.044	TRUE	FALSE	FALSE	FALSE	FALSE	TRUE	FALSE	TRUE	TRUE	TRUE	TRUE	TRUE	TRUE
SE	ENSG00000110171	TRIM3	chr11:6495021:6495214:-@chr11:6486795:6486962:-@chr11:6479295:6479526:-	0.94	0.93	0.86	0.88	0.87	0.89	0.92	0.9	0.0305994	0.0415667	0.135265	0.251931	0.0454758	0.9356	0.8735	0.8855	0.9175	0.0621	0.0501	0.0181	-0.012	-0.044	0.0621	0.0501	0.0181	0.012	0.044	TRUE	TRUE	FALSE	FALSE	FALSE	TRUE	FALSE	FALSE	TRUE	FALSE	TRUE	FALSE	TRUE
SE	ENSG00000104064	GABPB1	chr15:50647182:50647605:-@chr15:50638569:50638592:-@chr15:50601888:50601995:-	0.22	0.2	0.33	0.3	0.36	0.26	0.3	0.41	0.0164868	0.134927	0.106592	0.480965	0.285293	0.2106	0.3185	0.3155	0.3625	-0.1079	-0.1049	-0.1519	0.003	-0.044	0.1079	0.1049	0.1519	0.003	0.044	TRUE	FALSE	FALSE	FALSE	FALSE	TRUE	FALSE	TRUE	TRUE	TRUE	TRUE	TRUE	TRUE
SE	ENSG00000140307,ENSG00000227161	GTF2A2,AC092755.4	chr15:59949605:59949737:-@chr15:59944405:59944525:-@chr15:59942868:59942963:-	0.76	0.77	0.82	0.83	0.65	0.74	0.78	0.67	0.00700043	0.193225	0.326193	0.106571	0.163181	0.7656	0.8285	0.7005	0.7325	-0.0629	0.0651	0.0331	0.128	0.096	0.0629	0.0651	0.0331	0.128	0.096	TRUE	FALSE	FALSE	FALSE	FALSE	TRUE	FALSE	TRUE	TRUE	TRUE	TRUE	TRUE	TRUE
SE	ENSG00000173575	CHD2	chr15:93514995:93515157:+@chr15:93515495:93515647:+@chr15:93518109:93518180:+	0.84	0.8	0.73	0.67	0.67	0.81	0.77	0.71	0.0480489	0.236299	0.0970279	0.330046	0.201088	0.8206	0.7035	0.7455	0.7475	0.1171	0.0751	0.0731	-0.042	-0.044	0.1171	0.0751	0.0731	0.042	0.044	TRUE	FALSE	FALSE	FALSE	FALSE	TRUE	FALSE	TRUE	TRUE	TRUE	TRUE	TRUE	TRUE
SE	ENSG00000180229	HERC2P3	chr15:20710644:20710746:-@chr15:20688656:20688770:-@chr15:20671448:20671623:-	0.26	0.11	0.52	0.58	0.57	0.38	0.5	0.28	0.0463669	0.0705	0.133601	0.289282	0.188895	0.1856	0.5535	0.4805	0.3975	-0.3679	-0.2949	-0.2119	0.073	0.156	0.3679	0.2949	0.2119	0.073	0.156	TRUE	FALSE	FALSE	FALSE	FALSE	TRUE	FALSE	TRUE	TRUE	TRUE	TRUE	TRUE	TRUE
SE	ENSG00000073417	PDE8A	chr15:85626787:85626875:+@chr15:85634275:85634412:+@chr15:85641179:85641267:+	0.44	0.49	0.58	0.6	0.4	0.68	0.61	0.54	0.0414652	0.335266	0.0613797	0.395238	0.402605	0.4656	0.5935	0.5455	0.5825	-0.1279	-0.0799	-0.1169	0.048	0.011	0.1279	0.0799	0.1169	0.048	0.011	TRUE	FALSE	FALSE	FALSE	FALSE	TRUE	FALSE	TRUE	TRUE	TRUE	TRUE	TRUE	TRUE
SE	ENSG00000137819	PAQR5	chr15:69629680:69629840:+@chr15:69652305:69652470:+@chr15:69672222:69672349:+	0.53	0.51	0.64	0.68	0.52	0.58	0.77	0.81	0.0244166	0.223377	0.00929019	0.0577225	0.0218796	0.5206	0.6635	0.5555	0.7975	-0.1429	-0.0349	-0.2769	0.108	-0.134	0.1429	0.0349	0.2769	0.108	0.134	TRUE	FALSE	TRUE	FALSE	TRUE	TRUE	TRUE	FALSE	TRUE	FALSE	TRUE	TRUE	FALSE
SE	ENSG00000259328	RP11-152F13.7	chr15:82970155:82970343:+@chr15:82970439:82970476:+@chr15:82970614:82970704:+	0.8	0.64	0.26	0.37	0.65	0.63	0.55	0.6	0.0330467	0.260246	0.158714	0.0495166	0.0446313	0.7206	0.3185	0.6455	0.5825	0.4021	0.0751	0.1381	-0.327	-0.264	0.4021	0.0751	0.1381	0.327	0.264	TRUE	FALSE	FALSE	TRUE	TRUE	TRUE	TRUE	TRUE	TRUE	TRUE	TRUE	TRUE	TRUE
SE	ENSG00000255769	RP11-152F13.3	chr15:82798116:82798350:-@chr15:82769979:82770067:-@chr15:82769535:82769723:-	0.17	0.28	0.54	0.45	0.34	0.1	0.66	0.54	0.0322971	0.499743	0.0212602	0.116806	0.144667	0.2256	0.4985	0.2255	0.6075	-0.2729	0.0001	-0.3819	0.273	-0.109	0.2729	0.0001	0.3819	0.273	0.109	TRUE	FALSE	TRUE	FALSE	FALSE	TRUE	FALSE	FALSE	TRUE	FALSE	TRUE	TRUE	FALSE
SE	ENSG00000137831	UACA	chr15:70970438:70970545:-@chr15:70969447:70969479:-@chr15:70968832:70968930:-	0.67	0.64	0.76	0.73	0.7	0.57	0.54	0.51	0.0242223	0.42723	0.0142575	0.166327	0.00444637	0.6556	0.7485	0.6405	0.5325	-0.0929	0.0151	0.1231	0.108	0.216	0.0929	0.0151	0.1231	0.108	0.216	TRUE	FALSE	TRUE	FALSE	TRUE	TRUE	TRUE	FALSE	TRUE	FALSE	TRUE	TRUE	FALSE
SE	ENSG00000176700	SCAND2	chr15:85174691:85175529:+@chr15:85177055:85177612:+@chr15:85180578:85180651:+	0.2	0.23	0.13	0.11	0.09	0.17	0.3	0.13	0.0232246	0.13648	0.474159	0.408739	0.224037	0.2156	0.1235	0.1355	0.2225	0.0921	0.0801	-0.0069	-0.012	-0.099	0.0921	0.0801	0.0069	0.012	0.099	TRUE	FALSE	FALSE	FALSE	FALSE	TRUE	FALSE	TRUE	TRUE	TRUE	TRUE	TRUE	TRUE
SE	ENSG00000140319	SRP14	chr15:40331294:40331389:-@chr15:40331077:40331149:-@chr15:40330483:40330595:-	0.8	0.78	0.72	0.71	0.55	0.76	0.76	0.83	0.028129	0.216155	0.397805	0.339987	0.125061	0.7906	0.7185	0.6605	0.8025	0.0721	0.1301	-0.0119	0.058	-0.084	0.0721	0.1301	0.0119	0.058	0.084	TRUE	FALSE	FALSE	FALSE	FALSE	TRUE	FALSE	TRUE	TRUE	TRUE	TRUE	TRUE	TRUE
SE	ENSG00000104164	PLDN	chr15:45879417:45879723:+@chr15:45884333:45884474:+@chr15:45890078:45891760:+	0.86	0.9	0.72	0.74	0.69	0.51	0.55	0.62	0.020832	0.0934079	0.0179676	0.192973	0.0670407	0.8806	0.7335	0.6055	0.5925	0.1471	0.2751	0.2881	0.128	0.141	0.1471	0.2751	0.2881	0.128	0.141	TRUE	FALSE	TRUE	FALSE	FALSE	TRUE	FALSE	FALSE	TRUE	FALSE	TRUE	TRUE	FALSE
SE	ENSG00000047346	FAM214A	chr15:52970203:52970319:-@chr15:52905870:52906054:-@chr15:52903772:52903974:-	0.93	0.88	0.73	0.73	0.77	0.79	0.76	0.83	0.0465884	0.0476971	0.077502	0.0630801	0.151227	0.9056	0.7335	0.7855	0.8025	0.1721	0.1201	0.1031	-0.052	-0.069	0.1721	0.1201	0.1031	0.052	0.069	TRUE	TRUE	FALSE	FALSE	FALSE	TRUE	FALSE	FALSE	TRUE	FALSE	TRUE	FALSE	TRUE
SE	ENSG00000166949	SMAD3	chr15:67473579:67473791:+@chr15:67477065:67477202:+@chr15:67479703:67479847:+	0.82	0.85	0.91	0.94	0.87	0.89	0.9	0.91	0.0245207	0.0605442	0.0437721	0.0828049	0.240748	0.8356	0.9285	0.8855	0.9125	-0.0929	-0.0499	-0.0769	0.043	0.016	0.0929	0.0499	0.0769	0.043	0.016	TRUE	FALSE	TRUE	FALSE	FALSE	TRUE	FALSE	FALSE	TRUE	FALSE	TRUE	TRUE	FALSE
SE	ENSG00000156958	GALK2	chr15:49531418:49531564:+@chr15:49574184:49574282:+@chr15:49575763:49575915:+	0.81	0.79	0.74	0.73	0.57	0.82	0.75	0.85	0.0342852	0.285487	0.456992	0.40642	0.200414	0.8006	0.7385	0.7005	0.8075	0.0621	0.1001	-0.0069	0.038	-0.069	0.0621	0.1001	0.0069	0.038	0.069	TRUE	FALSE	FALSE	FALSE	FALSE	TRUE	FALSE	TRUE	TRUE	TRUE	TRUE	TRUE	TRUE
SE	ENSG00000137822	TUBGCP4	chr15:43693914:43694048:+@chr15:43695881:43696040:+@chr15:43696611:43696750:+	0.82	0.85	0.69	0.7	0.79	0.75	0.81	0.65	0.0212311	0.0711112	0.214436	0.0683562	0.354819	0.8356	0.6985	0.7755	0.7375	0.1371	0.0601	0.0981	-0.077	-0.039	0.1371	0.0601	0.0981	0.077	0.039	TRUE	FALSE	FALSE	FALSE	FALSE	TRUE	FALSE	TRUE	TRUE	TRUE	TRUE	TRUE	TRUE
SE	NA	NA	chr15:40453210:40453456:+@chr15:40457254:40457397:+@chr15:40462263:40462322:+	0.73	0.64	0.93	0.85	0.91	0.84	0.84	0.79	0.0382813	0.0418186	0.0767151	0.413863	0.144571	0.6856	0.8935	0.8805	0.8225	-0.2079	-0.1949	-0.1369	0.013	0.071	0.2079	0.1949	0.1369	0.013	0.071	TRUE	TRUE	FALSE	FALSE	FALSE	TRUE	FALSE	FALSE	TRUE	FALSE	TRUE	FALSE	TRUE
SE	ENSG00000051180	RAD51	chr15:40993262:40993399:+@chr15:40998375:40998492:+@chr15:41001223:41001314:+	0.78	0.78	0.83	0.84	0.73	0.69	0.7	0.69	0.0295422	0.0925737	0.017637	0.0404756	0.00161912	0.7806	0.8385	0.7155	0.7025	-0.0579	0.0651	0.0781	0.123	0.136	0.0579	0.0651	0.0781	0.123	0.136	TRUE	FALSE	TRUE	TRUE	TRUE	TRUE	TRUE	FALSE	TRUE	FALSE	TRUE	TRUE	FALSE
SE	ENSG00000179151	EDC3	chr15:74979432:74979520:-@chr15:74969282:74969363:-@chr15:74967302:74967483:-	0.18	0.22	0.37	0.33	0.5	0.2	0.29	0.41	0.015589	0.243438	0.104606	0.495751	0.479304	0.2006	0.3535	0.3555	0.3575	-0.1529	-0.1549	-0.1569	-0.002	-0.004	0.1529	0.1549	0.1569	0.002	0.004	TRUE	FALSE	FALSE	FALSE	FALSE	TRUE	FALSE	TRUE	TRUE	TRUE	TRUE	TRUE	TRUE
SE	ENSG00000166734	CASC4	chr15:44620883:44620985:+@chr15:44624186:44624276:+@chr15:44629961:44630105:+	0.86	0.88	0.78	0.78	0.85	0.87	0.82	0.84	0.0346085	0.377268	0.0732448	0.0402411	0.0607921	0.8706	0.7835	0.8655	0.8375	0.0871	0.0051	0.0331	-0.082	-0.054	0.0871	0.0051	0.0331	0.082	0.054	TRUE	FALSE	FALSE	TRUE	FALSE	TRUE	TRUE	TRUE	TRUE	TRUE	TRUE	TRUE	TRUE
SE	ENSG00000250988	RP11-752G15.6	chr15:83423381:83423536:+@chr15:83425482:83425537:+@chr15:83425656:83425958:+	0.72	0.71	0.5	0.54	0.61	0.46	0.47	0.5	0.0266312	0.127308	0.0133373	0.429192	0.179373	0.7156	0.5235	0.5405	0.4925	0.1921	0.1751	0.2231	-0.017	0.031	0.1921	0.1751	0.2231	0.017	0.031	TRUE	FALSE	TRUE	FALSE	FALSE	TRUE	FALSE	FALSE	TRUE	FALSE	TRUE	TRUE	FALSE
SE	ENSG00000179335	CLK3	chr15:74912350:74912566:+@chr15:74914835:74914901:+@chr15:74917243:74917359:+	0.54	0.57	0.44	0.41	0.5	0.38	0.44	0.49	0.0126128	0.151258	0.0678194	0.411888	0.151116	0.5556	0.4285	0.4455	0.4725	0.1271	0.1101	0.0831	-0.017	-0.044	0.1271	0.1101	0.0831	0.017	0.044	TRUE	FALSE	FALSE	FALSE	FALSE	TRUE	FALSE	TRUE	TRUE	TRUE	TRUE	TRUE	TRUE
SE	ENSG00000137807	KIF23	chr15:69732647:69732826:+@chr15:69733107:69733418:+@chr15:69737129:69737380:+	0.26	0.28	0.22	0.21	0.25	0.25	0.2	0.22	0.0368951	0.179974	0.0328386	0.0369736	0.470687	0.2706	0.2185	0.2555	0.2175	0.0521	0.0151	0.0531	-0.037	0.001	0.0521	0.0151	0.0531	0.037	0.001	TRUE	FALSE	TRUE	FALSE	FALSE	TRUE	FALSE	FALSE	TRUE	FALSE	TRUE	TRUE	FALSE
SE	ENSG00000137776	SLTM	chr15:59209134:59209198:-@chr15:59205698:59205895:-@chr15:59204762:59204809:-	0.49	0.51	0.6	0.59	0.59	0.6	0.55	0.32	0.015384	0.0117254	0.350513	0.402866	0.201406	0.5006	0.5985	0.6005	0.4425	-0.0979	-0.0999	0.0581	-0.002	0.156	0.0979	0.0999	0.0581	0.002	0.156	TRUE	TRUE	FALSE	FALSE	FALSE	TRUE	FALSE	FALSE	TRUE	FALSE	TRUE	FALSE	TRUE
SE	ENSG00000168970	JMJD7-PLA2G4B	chr15:42138867:42139033:+@chr15:42139535:42139721:+@chr15:42139847:42140346:+	0.95	0.95	0.88	0.89	0.54	0.85	0.92	0.83	0.0275349	0.177062	0.184229	0.219879	0.457409	0.9506	0.8885	0.7005	0.8825	0.0621	0.2501	0.0681	0.188	0.006	0.0621	0.2501	0.0681	0.188	0.006	TRUE	FALSE	FALSE	FALSE	FALSE	TRUE	FALSE	TRUE	TRUE	TRUE	TRUE	TRUE	TRUE
SE	ENSG00000140386	SCAPER	chr15:77087621:77087781:-@chr15:77085574:77085732:-@chr15:77067196:77067458:-	0.08	0.04	0.21	0.25	0.42	0.22	0.12	0.24	0.0134292	0.108618	0.129708	0.2609	0.291846	0.0606	0.2335	0.3255	0.1875	-0.1729	-0.2649	-0.1269	-0.092	0.046	0.1729	0.2649	0.1269	0.092	0.046	TRUE	FALSE	FALSE	FALSE	FALSE	TRUE	FALSE	TRUE	TRUE	TRUE	TRUE	TRUE	TRUE
SE	ENSG00000104133	SPG11	chr15:44898223:44898289:-@chr15:44896303:44896395:-@chr15:44892665:44892830:-	0.1	0.17	0.32	0.25	0.25	0.22	0.15	0.18	0.0443694	0.0823173	0.234715	0.188809	0.070805	0.1356	0.2885	0.2405	0.1725	-0.1529	-0.1049	-0.0369	0.048	0.116	0.1529	0.1049	0.0369	0.048	0.116	TRUE	FALSE	FALSE	FALSE	FALSE	TRUE	FALSE	TRUE	TRUE	TRUE	TRUE	TRUE	TRUE
SE	ENSG00000128829	EIF2AK4	chr15:40270279:40270348:+@chr15:40278006:40278089:+@chr15:40280184:40280306:+	0.77	0.75	0.67	0.67	0.6	0.7	0.74	0.68	0.0375333	0.137415	0.182469	0.391012	0.187972	0.7606	0.6735	0.6555	0.7175	0.0871	0.1051	0.0431	0.018	-0.044	0.0871	0.1051	0.0431	0.018	0.044	TRUE	FALSE	FALSE	FALSE	FALSE	TRUE	FALSE	TRUE	TRUE	TRUE	TRUE	TRUE	TRUE
SE	ENSG00000137868	STRA6	chr15:74488349:74488488:-@chr15:74487993:74488016:-@chr15:74487643:74487809:-	0.9	0.89	0.75	0.75	0.81	0.76	0.75	0.84	0.0115199	0.066079	0.142896	0.18613	0.238209	0.8956	0.7535	0.7905	0.8025	0.1421	0.1051	0.0931	-0.037	-0.049	0.1421	0.1051	0.0931	0.037	0.049	TRUE	FALSE	FALSE	FALSE	FALSE	TRUE	FALSE	TRUE	TRUE	TRUE	TRUE	TRUE	TRUE
SE	ENSG00000074603	DPP8	chr15:65748563:65748709:-@chr15:65746601:65746753:-@chr15:65744298:65744440:-	0.79	0.8	0.71	0.69	0.74	0.52	0.84	0.74	0.0159355	0.190774	0.4878	0.323022	0.150032	0.7956	0.7035	0.6355	0.7975	0.0921	0.1601	-0.0019	0.068	-0.094	0.0921	0.1601	0.0019	0.068	0.094	TRUE	FALSE	FALSE	FALSE	FALSE	TRUE	FALSE	TRUE	TRUE	TRUE	TRUE	TRUE	TRUE
SE	ENSG00000181026	AEN	chr15:89173289:89173455:+@chr15:89173614:89173614:+@chr15:89174333:89175512:+	0.51	0.49	0.42	0.44	0.42	0.49	0.37	0.47	0.0226253	0.226428	0.188786	0.291798	0.462554	0.5006	0.4335	0.4605	0.4275	0.0671	0.0401	0.0731	-0.027	0.006	0.0671	0.0401	0.0731	0.027	0.006	TRUE	FALSE	FALSE	FALSE	FALSE	TRUE	FALSE	TRUE	TRUE	TRUE	TRUE	TRUE	TRUE
SE	ENSG00000137871	ZNF280D	chr15:56999461:56999504:-@chr15:56999280:56999348:-@chr15:56996319:56996465:-	0.75	0.75	0.69	0.67	0.57	0.75	0.67	0.67	0.0445269	0.259785	5.59186e-05	0.437569	0.320655	0.7506	0.6835	0.6655	0.6775	0.0671	0.0851	0.0731	0.018	0.006	0.0671	0.0851	0.0731	0.018	0.006	TRUE	FALSE	TRUE	FALSE	FALSE	TRUE	FALSE	FALSE	TRUE	FALSE	TRUE	TRUE	FALSE
SE	ENSG00000259248	RP11-265M18.2	chr15:63886894:63886985:-@chr15:63885948:63886076:-@chr15:63879909:63881299:-	0.17	0.2	0.26	0.31	0.42	0.16	0.33	0.35	0.0499634	0.275573	0.00811968	0.482895	0.113106	0.1856	0.2885	0.2955	0.3475	-0.1029	-0.1099	-0.1619	-0.007	-0.059	0.1029	0.1099	0.1619	0.007	0.059	TRUE	FALSE	TRUE	FALSE	FALSE	TRUE	FALSE	FALSE	TRUE	FALSE	TRUE	TRUE	FALSE
SE	ENSG00000103995	CEP152	chr15:49044546:49044666:-@chr15:49040640:49040807:-@chr15:49037093:49037189:-	0.83	0.86	0.74	0.78	0.78	0.83	0.72	0.75	0.0471364	0.190146	0.0201952	0.146363	0.252582	0.8456	0.7635	0.8105	0.7425	0.0821	0.0351	0.1031	-0.047	0.021	0.0821	0.0351	0.1031	0.047	0.021	TRUE	FALSE	TRUE	FALSE	FALSE	TRUE	FALSE	FALSE	TRUE	FALSE	TRUE	TRUE	FALSE
SE	ENSG00000128829	EIF2AK4	chr15:40303482:40303547:+@chr15:40308703:40308873:+@chr15:40309309:40309443:+	0.87	0.84	0.7	0.63	0.81	0.81	0.83	0.85	0.0381459	0.11656	0.355583	0.0733449	0.0490948	0.8556	0.6685	0.8155	0.8475	0.1871	0.0401	0.0081	-0.147	-0.179	0.1871	0.0401	0.0081	0.147	0.179	TRUE	FALSE	FALSE	FALSE	TRUE	TRUE	TRUE	TRUE	TRUE	TRUE	TRUE	TRUE	TRUE
SE	NA	NA	chr15:41021703:41021832:+@chr15:41022051:41022172:+@chr15:41023253:41024356:+	0.96	0.95	0.88	0.9	0.91	0.92	0.94	0.95	0.0305994	0.0225104	0.363233	0.0950267	0.0325008	0.9556	0.8935	0.9205	0.9525	0.0621	0.0351	0.0031	-0.027	-0.059	0.0621	0.0351	0.0031	0.027	0.059	TRUE	FALSE	FALSE	FALSE	TRUE	TRUE	TRUE	TRUE	TRUE	TRUE	TRUE	TRUE	TRUE
SE	ENSG00000149636	DSN1	chr20:35401797:35402154:-@chr20:35399276:35399876:-@chr20:35396372:35396445:-	0.95	0.94	0.87	0.88	0.87	0.93	0.9	0.91	0.00647647	0.20455	0.0251045	0.268235	0.0242777	0.9456	0.8785	0.9055	0.9125	0.0671	0.0401	0.0331	-0.027	-0.034	0.0671	0.0401	0.0331	0.027	0.034	TRUE	FALSE	FALSE	FALSE	FALSE	TRUE	FALSE	TRUE	TRUE	TRUE	TRUE	TRUE	TRUE
SE	ENSG00000101347	SAMHD1	chr20:35532560:35532652:-@chr20:35526843:35526947:-@chr20:35526225:35526362:-	0.89	0.91	0.79	0.82	0.81	0.72	0.82	0.87	0.0264582	0.0984347	0.142423	0.272854	0.15124	0.9006	0.8085	0.7705	0.8525	0.0921	0.1301	0.0481	0.038	-0.044	0.0921	0.1301	0.0481	0.038	0.044	TRUE	FALSE	FALSE	FALSE	FALSE	TRUE	FALSE	TRUE	TRUE	TRUE	TRUE	TRUE	TRUE
SE	ENSG00000101198	NKAIN4	chr20:61875376:61875436:-@chr20:61873891:61873975:-@chr20:61872136:61872858:-	0.9	0.84	0.63	0.61	0.47	0.65	0.76	0.49	0.0287637	0.0777097	0.158301	0.318441	0.478744	0.8706	0.6235	0.5655	0.6325	0.2471	0.3051	0.2381	0.058	-0.009	0.2471	0.3051	0.2381	0.058	0.009	TRUE	FALSE	FALSE	FALSE	FALSE	TRUE	FALSE	TRUE	TRUE	TRUE	TRUE	TRUE	TRUE
SE	ENSG00000078699	CBFA2T2	chr20:32150171:32150480:+@chr20:32161780:32162067:+@chr20:32194762:32194905:+	0.51	0.59	0.79	0.71	0.6	0.74	0.65	0.68	0.034149	0.14684	0.0825222	0.229531	0.129953	0.5506	0.7535	0.6755	0.6725	-0.2029	-0.1249	-0.1219	0.078	0.081	0.2029	0.1249	0.1219	0.078	0.081	TRUE	FALSE	FALSE	FALSE	FALSE	TRUE	FALSE	TRUE	TRUE	TRUE	TRUE	TRUE	TRUE
SE	ENSG00000171456	ASXL1	chr20:30956818:30956926:+@chr20:30959581:30959677:+@chr20:30959967:30960352:+	0.17	0.21	0.11	0.07	0.07	0.14	0.14	0.07	0.0361927	0.110872	0.110069	0.362722	0.344811	0.1906	0.0935	0.1105	0.1125	0.0971	0.0801	0.0781	-0.017	-0.019	0.0971	0.0801	0.0781	0.017	0.019	TRUE	FALSE	FALSE	FALSE	FALSE	TRUE	FALSE	TRUE	TRUE	TRUE	TRUE	TRUE	TRUE
SE	ENSG00000101391	CDK5RAP1	chr20:31960448:31960503:-@chr20:31958305:31958435:-@chr20:31954665:31954814:-	0.9	0.91	0.82	0.81	0.83	0.85	0.88	0.9	0.00271221	0.0359519	0.290232	0.0994413	0.0254243	0.9056	0.8185	0.8455	0.8975	0.0871	0.0601	0.0081	-0.027	-0.079	0.0871	0.0601	0.0081	0.027	0.079	TRUE	TRUE	FALSE	FALSE	TRUE	TRUE	TRUE	FALSE	TRUE	FALSE	TRUE	FALSE	TRUE
SE	ENSG00000214078	CPNE1	chr20:34220233:34220307:-@chr20:34220085:34220156:-@chr20:34219867:34219947:-	0.65	0.62	0.48	0.48	0.55	0.64	0.51	0.52	0.0319938	0.289513	0.0299848	0.118041	0.043486	0.6356	0.4835	0.6005	0.5225	0.1521	0.0351	0.1131	-0.117	-0.039	0.1521	0.0351	0.1131	0.117	0.039	TRUE	FALSE	TRUE	FALSE	FALSE	TRUE	FALSE	FALSE	TRUE	FALSE	TRUE	TRUE	FALSE
SE	ENSG00000101040	ZMYND8	chr20:45905058:45905539:-@chr20:45891029:45891172:-@chr20:45878031:45878183:-	0.69	0.63	0.79	0.84	0.68	0.71	0.79	0.62	0.0303097	0.198101	0.324866	0.039571	0.208809	0.6606	0.8185	0.7005	0.7125	-0.1579	-0.0399	-0.0519	0.118	0.106	0.1579	0.0399	0.0519	0.118	0.106	TRUE	FALSE	FALSE	TRUE	FALSE	TRUE	TRUE	TRUE	TRUE	TRUE	TRUE	TRUE	TRUE
SE	NA	NA	chr20:32582011:32582163:-@chr20:32580866:32580956:-@chr20:32580294:32580711:-	0.53	0.51	0.66	0.66	0.29	0.65	0.54	0.46	0.0228934	0.422082	0.398634	0.243522	0.0789137	0.5206	0.6635	0.4755	0.5075	-0.1429	0.0451	0.0131	0.188	0.156	0.1429	0.0451	0.0131	0.188	0.156	TRUE	FALSE	FALSE	FALSE	FALSE	TRUE	FALSE	TRUE	TRUE	TRUE	TRUE	TRUE	TRUE
SE	ENSG00000101150	TPD52L2	chr20:62505021:62505169:+@chr20:62514072:62514173:+@chr20:62520543:62520591:+	0.79	0.78	0.86	0.85	0.78	0.83	0.84	0.86	0.00510641	0.251918	0.0247551	0.151825	0.470687	0.7856	0.8585	0.8105	0.8575	-0.0729	-0.0249	-0.0719	0.048	0.001	0.0729	0.0249	0.0719	0.048	0.001	TRUE	FALSE	TRUE	FALSE	FALSE	TRUE	FALSE	FALSE	TRUE	FALSE	TRUE	TRUE	FALSE
SE	ENSG00000149636	DSN1	chr20:35402065:35402230:-@chr20:35399828:35399876:-@chr20:35399276:35399596:-	0.57	0.56	0.66	0.65	0.43	0.53	0.66	0.7	0.00320859	0.177867	0.0443409	0.0891897	0.191914	0.5656	0.6585	0.4855	0.6875	-0.0929	0.0801	-0.1219	0.173	-0.029	0.0929	0.0801	0.1219	0.173	0.029	TRUE	FALSE	TRUE	FALSE	FALSE	TRUE	FALSE	FALSE	TRUE	FALSE	TRUE	TRUE	FALSE
SE	ENSG00000087586	AURKA	chr20:54967224:54967351:-@chr20:54965612:54965721:-@chr20:54963743:54963840:-	0.58	0.59	0.75	0.71	0.73	0.65	0.63	0.69	0.0351638	0.107841	0.110232	0.253324	0.11577	0.5856	0.7335	0.6955	0.6675	-0.1479	-0.1099	-0.0819	0.038	0.066	0.1479	0.1099	0.0819	0.038	0.066	TRUE	FALSE	FALSE	FALSE	FALSE	TRUE	FALSE	TRUE	TRUE	TRUE	TRUE	TRUE	TRUE
SE	ENSG00000196756	RP4-564F22.2	chr20:37055062:37055146:-@chr20:37054583:37054696:-@chr20:37050739:37050888:-	0.44	0.36	0.24	0.18	0.25	0.5	0.47	0.18	0.0369835	0.450155	0.360205	0.201074	0.279606	0.4006	0.2135	0.3805	0.3325	0.1871	0.0201	0.0681	-0.167	-0.119	0.1871	0.0201	0.0681	0.167	0.119	TRUE	FALSE	FALSE	FALSE	FALSE	TRUE	FALSE	TRUE	TRUE	TRUE	TRUE	TRUE	TRUE
SE	ENSG00000124155	PIGT	chr20:44045157:44045334:+@chr20:44047918:44048035:+@chr20:44048144:44048230:+	0.21	0.19	0.1	0.07	0.13	0.11	0.24	0.07	0.0154197	0.0170062	0.365188	0.0931563	0.270059	0.2006	0.0885	0.1255	0.1625	0.1121	0.0751	0.0381	-0.037	-0.074	0.1121	0.0751	0.0381	0.037	0.074	TRUE	TRUE	FALSE	FALSE	FALSE	TRUE	FALSE	FALSE	TRUE	FALSE	TRUE	FALSE	TRUE
SE	ENSG00000101166	SLMO2	chr20:57617754:57617901:-@chr20:57613521:57613689:-@chr20:57611745:57611815:-	0.82	0.81	0.74	0.76	0.71	0.83	0.7	0.77	0.0305994	0.313562	0.140989	0.389155	0.405144	0.8156	0.7535	0.7755	0.7425	0.0621	0.0401	0.0731	-0.022	0.011	0.0621	0.0401	0.0731	0.022	0.011	TRUE	FALSE	FALSE	FALSE	FALSE	TRUE	FALSE	TRUE	TRUE	TRUE	TRUE	TRUE	TRUE
SE	ENSG00000125826	RBCK1	chr20:400202:400375:+@chr20:401515:401675:+@chr20:402771:402882:+	0.76	0.75	0.83	0.84	0.74	0.79	0.76	0.8	0.00427209	0.331478	0.175732	0.107887	0.112609	0.7556	0.8385	0.7705	0.7875	-0.0829	-0.0149	-0.0319	0.068	0.051	0.0829	0.0149	0.0319	0.068	0.051	TRUE	FALSE	FALSE	FALSE	FALSE	TRUE	FALSE	TRUE	TRUE	TRUE	TRUE	TRUE	TRUE
SE	ENSG00000125846	ZNF133	chr20:18286942:18287037:+@chr20:18287350:18287391:+@chr20:18295713:18297635:+	0.1	0.13	0.22	0.19	0.22	0.15	0.13	0.23	0.0228629	0.120787	0.188647	0.348583	0.375156	0.1156	0.2085	0.1905	0.1875	-0.0929	-0.0749	-0.0719	0.018	0.021	0.0929	0.0749	0.0719	0.018	0.021	TRUE	FALSE	FALSE	FALSE	FALSE	TRUE	FALSE	TRUE	TRUE	TRUE	TRUE	TRUE	TRUE
SE	ENSG00000124151	NCOA3	chr20:46266392:46266527:+@chr20:46267752:46267946:+@chr20:46268366:46268566:+	0.84	0.85	0.92	0.92	0.79	0.87	0.88	0.85	0.0177491	0.422287	0.147539	0.137275	0.0879886	0.8456	0.9235	0.8355	0.8725	-0.0779	0.0101	-0.0269	0.088	0.051	0.0779	0.0101	0.0269	0.088	0.051	TRUE	FALSE	FALSE	FALSE	FALSE	TRUE	FALSE	TRUE	TRUE	TRUE	TRUE	TRUE	TRUE
SE	ENSG00000146918	NCAPG2	chr7:158456876:158456988:-@chr7:158454886:158455059:-@chr7:158451030:158451100:-	0.83	0.83	0.77	0.78	0.72	0.79	0.81	0.77	0.032844	0.149198	0.169415	0.350602	0.251312	0.8306	0.7785	0.7605	0.7975	0.0521	0.0701	0.0331	0.018	-0.019	0.0521	0.0701	0.0331	0.018	0.019	TRUE	FALSE	FALSE	FALSE	FALSE	TRUE	FALSE	TRUE	TRUE	TRUE	TRUE	TRUE	TRUE
SE	ENSG00000127947	PTPN12	chr7:77210744:77210820:+@chr7:77212872:77212967:+@chr7:77214860:77214898:+	0.59	0.53	0.42	0.37	0.46	0.49	0.51	0.47	0.0287883	0.0926972	0.121974	0.0635775	0.0463966	0.5606	0.3985	0.4805	0.4975	0.1621	0.0801	0.0631	-0.082	-0.099	0.1621	0.0801	0.0631	0.082	0.099	TRUE	FALSE	FALSE	FALSE	TRUE	TRUE	TRUE	TRUE	TRUE	TRUE	TRUE	TRUE	TRUE
SE	ENSG00000160813	PPP1R35	chr7:100033471:100033687:-@chr7:100033254:100033390:-@chr7:100032905:100033156:-	0.66	0.74	0.51	0.55	0.7	0.59	0.63	0.54	0.0492143	0.270451	0.106465	0.124606	0.196484	0.7006	0.5335	0.6505	0.5925	0.1671	0.0501	0.1081	-0.117	-0.059	0.1671	0.0501	0.1081	0.117	0.059	TRUE	FALSE	FALSE	FALSE	FALSE	TRUE	FALSE	TRUE	TRUE	TRUE	TRUE	TRUE	TRUE
SE	ENSG00000136244	IL6	chr7:22766766:22766900:+@chr7:22767063:22767253:+@chr7:22768312:22768425:+	0.6	0.61	0.92	0.9	0.61	0.73	0.84	0.83	0.00281221	0.2267	0.000369575	0.0755821	0.0235219	0.6056	0.9135	0.6755	0.8425	-0.3079	-0.0699	-0.2369	0.238	0.071	0.3079	0.0699	0.2369	0.238	0.071	TRUE	FALSE	TRUE	FALSE	TRUE	TRUE	TRUE	FALSE	TRUE	FALSE	TRUE	TRUE	FALSE
SE	ENSG00000164828	SUN1	chr7:882978:883157:+@chr7:889157:889240:+@chr7:889560:889670:+	0.25	0.26	0.2	0.2	0.31	0.48	0.16	0.19	0.0267512	0.169357	0.0552292	0.130336	0.202302	0.2556	0.2035	0.4005	0.1825	0.0521	-0.1449	0.0731	-0.197	0.021	0.0521	0.1449	0.0731	0.197	0.021	TRUE	FALSE	FALSE	FALSE	FALSE	TRUE	FALSE	TRUE	TRUE	TRUE	TRUE	TRUE	TRUE
SE	NA	NA	chr7:101459184:101459373:+@chr7:101559395:101559505:+@chr7:101671378:101671425:+	0.69	0.72	0.76	0.78	0.68	0.79	0.76	0.8	0.0368357	0.320954	0.0473219	0.329028	0.311372	0.7056	0.7735	0.7405	0.7875	-0.0679	-0.0349	-0.0819	0.033	-0.014	0.0679	0.0349	0.0819	0.033	0.014	TRUE	FALSE	TRUE	FALSE	FALSE	TRUE	FALSE	FALSE	TRUE	FALSE	TRUE	TRUE	FALSE
SE	ENSG00000136279	DBNL	chr7:44089824:44089879:+@chr7:44092466:44092540:+@chr7:44096356:44096502:+	0.83	0.8	0.76	0.73	0.72	0.64	0.75	0.75	0.043527	0.0762858	0.0823109	0.16804	0.323166	0.8156	0.7485	0.6855	0.7575	0.0671	0.1301	0.0581	0.063	-0.009	0.0671	0.1301	0.0581	0.063	0.009	TRUE	FALSE	FALSE	FALSE	FALSE	TRUE	FALSE	TRUE	TRUE	TRUE	TRUE	TRUE	TRUE
SE	ENSG00000198874	TYW1	chr7:66548417:66548526:+@chr7:66563528:66563705:+@chr7:66582470:66582605:+	0.83	0.83	0.9	0.9	0.85	0.89	0.86	0.86	5.62116e-05	0.136281	0.00020602	0.20111	0.00019279	0.8306	0.9035	0.8755	0.8675	-0.0729	-0.0449	-0.0369	0.028	0.036	0.0729	0.0449	0.0369	0.028	0.036	TRUE	FALSE	FALSE	FALSE	FALSE	TRUE	FALSE	TRUE	TRUE	TRUE	TRUE	TRUE	TRUE
SE	ENSG00000105982	RNF32	chr7:156437193:156437451:+@chr7:156439148:156439254:+@chr7:156447270:156447412:+	0.26	0.2	0.42	0.35	0.45	0.25	0.25	0.19	0.0385141	0.208605	0.474164	0.399291	0.0368116	0.2306	0.3885	0.3555	0.2275	-0.1579	-0.1249	0.0031	0.033	0.161	0.1579	0.1249	0.0031	0.033	0.161	TRUE	FALSE	FALSE	FALSE	TRUE	TRUE	TRUE	TRUE	TRUE	TRUE	TRUE	TRUE	TRUE
SE	ENSG00000132436	FIGNL1	chr7:50517999:50518088:-@chr7:50516816:50517421:-@chr7:50515879:50515987:-	0.76	0.75	0.64	0.66	0.57	0.7	0.66	0.74	0.0148134	0.163895	0.221541	0.437794	0.200049	0.7556	0.6535	0.6405	0.7075	0.1021	0.1151	0.0481	0.013	-0.054	0.1021	0.1151	0.0481	0.013	0.054	TRUE	FALSE	FALSE	FALSE	FALSE	TRUE	FALSE	TRUE	TRUE	TRUE	TRUE	TRUE	TRUE
SE	ENSG00000239521	GATS	chr7:99820220:99820343:-@chr7:99809017:99809617:-@chr7:99798278:99800226:-	0.95	0.96	0.88	0.89	0.83	0.56	0.89	0.86	0.00618903	0.154299	0.049932	0.197518	0.37662	0.9556	0.8885	0.7005	0.8825	0.0671	0.2551	0.0731	0.188	0.006	0.0671	0.2551	0.0731	0.188	0.006	TRUE	FALSE	TRUE	FALSE	FALSE	TRUE	FALSE	FALSE	TRUE	FALSE	TRUE	TRUE	FALSE
SE	NA	NA	chr7:108209934:108210167:-@chr7:108206274:108206466:-@chr7:108202671:108205549:-	0.71	0.68	0.54	0.54	0.51	0.6	0.65	0.52	0.0319938	0.0894255	0.172623	0.386184	0.293201	0.6956	0.5435	0.5605	0.5925	0.1521	0.1351	0.1031	-0.017	-0.049	0.1521	0.1351	0.1031	0.017	0.049	TRUE	FALSE	FALSE	FALSE	FALSE	TRUE	FALSE	TRUE	TRUE	TRUE	TRUE	TRUE	TRUE
SE	ENSG00000128581	RABL5	chr7:100964952:100965093:-@chr7:100961405:100961494:-@chr7:100959621:100959823:-	0.78	0.84	0.66	0.62	0.74	0.76	0.67	0.65	0.0276601	0.145307	0.0521771	0.0308471	0.209441	0.8106	0.6435	0.7555	0.6675	0.1671	0.0551	0.1431	-0.112	-0.024	0.1671	0.0551	0.1431	0.112	0.024	TRUE	FALSE	FALSE	TRUE	FALSE	TRUE	TRUE	TRUE	TRUE	TRUE	TRUE	TRUE	TRUE
SE	ENSG00000183696	UPP1	chr7:48141421:48141467:+@chr7:48142894:48143008:+@chr7:48146470:48146679:+	0.33	0.18	0.62	0.69	0.42	0.4	0.41	0.41	0.0375733	0.138186	0.138729	0.0376728	0.0465257	0.2556	0.6585	0.4155	0.4175	-0.4029	-0.1599	-0.1619	0.243	0.241	0.4029	0.1599	0.1619	0.243	0.241	TRUE	FALSE	FALSE	TRUE	TRUE	TRUE	TRUE	TRUE	TRUE	TRUE	TRUE	TRUE	TRUE
SE	ENSG00000106397	PLOD3	chr7:100852134:100852238:-@chr7:100850859:100851005:-@chr7:100850060:100850185:-	0.82	0.84	0.91	0.89	0.88	0.92	0.91	0.87	0.0163298	0.0626256	0.0666543	0.470177	0.408172	0.8306	0.9035	0.9055	0.8975	-0.0729	-0.0749	-0.0669	-0.002	0.006	0.0729	0.0749	0.0669	0.002	0.006	TRUE	FALSE	FALSE	FALSE	FALSE	TRUE	FALSE	TRUE	TRUE	TRUE	TRUE	TRUE	TRUE
SE	ENSG00000001631	KRIT1	chr7:91874741:91874909:-@chr7:91874216:91874485:-@chr7:91871348:91871451:-	0.25	0.26	0.73	0.64	0.23	0.25	0.31	0.24	0.0313556	0.252753	0.288745	0.0260748	0.0109733	0.2556	0.6885	0.2455	0.2825	-0.4329	0.0101	-0.0269	0.443	0.406	0.4329	0.0101	0.0269	0.443	0.406	TRUE	FALSE	FALSE	TRUE	TRUE	TRUE	TRUE	TRUE	TRUE	TRUE	TRUE	TRUE	TRUE
SE	ENSG00000002746	HECW1	chr7:43152198:43152536:+@chr7:43153756:43153990:+@chr7:43351362:43351686:+	0.27	0.28	0.53	0.5	0.32	0.3	0.42	0.17	0.0120559	0.0512589	0.432274	0.00602361	0.164906	0.2756	0.5185	0.3155	0.3025	-0.2429	-0.0399	-0.0269	0.203	0.216	0.2429	0.0399	0.0269	0.203	0.216	TRUE	FALSE	FALSE	TRUE	FALSE	TRUE	TRUE	TRUE	TRUE	TRUE	TRUE	TRUE	TRUE
SE	ENSG00000169919	GUSB	chr7:65445211:65445396:-@chr7:65444373:65444528:-@chr7:65441002:65441189:-	0.16	0.18	0.29	0.34	0.48	0.04	0.2	0.23	0.0388656	0.370108	0.0638537	0.42467	0.0540399	0.1706	0.3185	0.2655	0.2225	-0.1479	-0.0949	-0.0519	0.053	0.096	0.1479	0.0949	0.0519	0.053	0.096	TRUE	FALSE	FALSE	FALSE	FALSE	TRUE	FALSE	TRUE	TRUE	TRUE	TRUE	TRUE	TRUE
SE	ENSG00000128581	RABL5	chr7:100964952:100965093:-@chr7:100962237:100962313:-@chr7:100961405:100961494:-	0.88	0.83	0.75	0.71	0.8	0.75	0.63	0.72	0.0345106	0.0836523	0.0549898	0.139055	0.225992	0.8556	0.7335	0.7805	0.6825	0.1221	0.0751	0.1731	-0.047	0.051	0.1221	0.0751	0.1731	0.047	0.051	TRUE	FALSE	FALSE	FALSE	FALSE	TRUE	FALSE	TRUE	TRUE	TRUE	TRUE	TRUE	TRUE
SE	NA	NA	chr7:27135713:27136007:+@chr7:27138717:27138985:+@chr7:27139398:27139877:+	0.85	0.84	0.92	0.91	0.85	0.96	0.92	0.94	0.00510641	0.224548	0.0172942	0.454462	0.14643	0.8456	0.9185	0.9105	0.9375	-0.0729	-0.0649	-0.0919	0.008	-0.019	0.0729	0.0649	0.0919	0.008	0.019	TRUE	FALSE	TRUE	FALSE	FALSE	TRUE	FALSE	FALSE	TRUE	FALSE	TRUE	TRUE	FALSE
SE	ENSG00000126870	WDR60	chr7:158711431:158711560:+@chr7:158715068:158715240:+@chr7:158716262:158716424:+	0.87	0.85	0.78	0.75	0.72	0.82	0.6	0.73	0.0217143	0.166131	0.103021	0.456632	0.186378	0.8606	0.7685	0.7755	0.6725	0.0921	0.0851	0.1881	-0.007	0.096	0.0921	0.0851	0.1881	0.007	0.096	TRUE	FALSE	FALSE	FALSE	FALSE	TRUE	FALSE	TRUE	TRUE	TRUE	TRUE	TRUE	TRUE
SE	ENSG00000169919	GUSB	chr7:65445211:65445396:-@chr7:65444386:65444528:-@chr7:65441002:65441189:-	0.59	0.57	0.75	0.78	0.69	0.49	0.63	0.81	0.00747863	0.452739	0.174355	0.163464	0.364667	0.5806	0.7685	0.5955	0.7275	-0.1879	-0.0149	-0.1469	0.173	0.041	0.1879	0.0149	0.1469	0.173	0.041	TRUE	FALSE	FALSE	FALSE	FALSE	TRUE	FALSE	TRUE	TRUE	TRUE	TRUE	TRUE	TRUE
SE	ENSG00000146733	PSPH	chr7:56119007:56119160:-@chr7:56110841:56110954:-@chr7:56101654:56101847:-	0.12	0.09	0.27	0.24	0.18	0.07	0.11	0.11	0.00939405	0.364041	0.290559	0.11944	0.0324769	0.1056	0.2585	0.1305	0.1175	-0.1529	-0.0249	-0.0119	0.128	0.141	0.1529	0.0249	0.0119	0.128	0.141	TRUE	FALSE	FALSE	FALSE	TRUE	TRUE	TRUE	TRUE	TRUE	TRUE	TRUE	TRUE	TRUE
SE	NA	NA	chr7:92747176:92747336:-@chr7:92744108:92744208:-@chr7:92728826:92735418:-	0.85	0.85	0.77	0.79	0.82	0.7	0.9	0.79	0.0492045	0.19422	0.488908	0.406703	0.21013	0.8506	0.7835	0.7655	0.8525	0.0671	0.0851	-0.0019	0.018	-0.069	0.0671	0.0851	0.0019	0.018	0.069	TRUE	FALSE	FALSE	FALSE	FALSE	TRUE	FALSE	TRUE	TRUE	TRUE	TRUE	TRUE	TRUE
SE	ENSG00000174368	PMS2P2	chr7:74984790:74984929:-@chr7:74982816:74982902:-@chr7:74981057:74981240:-	0.19	0.2	0.4	0.46	0.42	0.24	0.27	0.27	0.0377357	0.180884	0.0168643	0.230858	0.0614181	0.1956	0.4335	0.3355	0.2775	-0.2379	-0.1399	-0.0819	0.098	0.156	0.2379	0.1399	0.0819	0.098	0.156	TRUE	FALSE	TRUE	FALSE	FALSE	TRUE	FALSE	FALSE	TRUE	FALSE	TRUE	TRUE	FALSE
SE	ENSG00000106462	EZH2	chr7:148512598:148512638:-@chr7:148512006:148512131:-@chr7:148511051:148511229:-	0.66	0.7	0.78	0.74	0.79	0.71	0.76	0.81	0.047778	0.137275	0.0402973	0.438924	0.233617	0.6806	0.7635	0.7555	0.7925	-0.0829	-0.0749	-0.1119	0.008	-0.029	0.0829	0.0749	0.1119	0.008	0.029	TRUE	FALSE	TRUE	FALSE	FALSE	TRUE	FALSE	FALSE	TRUE	FALSE	TRUE	TRUE	FALSE
SE	NA	NA	chr7:128607334:128607446:-@chr7:128597278:128597369:-@chr7:128594234:128595439:-	0.62	0.63	0.55	0.54	0.78	0.52	0.61	0.58	0.00345326	0.427779	0.170071	0.280152	0.0710568	0.6256	0.5485	0.6555	0.6025	0.0771	-0.0299	0.0231	-0.107	-0.054	0.0771	0.0299	0.0231	0.107	0.054	TRUE	FALSE	FALSE	FALSE	FALSE	TRUE	FALSE	TRUE	TRUE	TRUE	TRUE	TRUE	TRUE
SE	ENSG00000006576	PHTF2	chr7:77569347:77569619:+@chr7:77569845:77569976:+@chr7:77572017:77572103:+	0.73	0.74	0.55	0.55	0.83	0.63	0.57	0.65	0.00744954	0.49968	0.103243	0.15925	0.179573	0.7356	0.5535	0.7355	0.6175	0.1821	0.0001	0.1181	-0.182	-0.064	0.1821	0.0001	0.1181	0.182	0.064	TRUE	FALSE	FALSE	FALSE	FALSE	TRUE	FALSE	TRUE	TRUE	TRUE	TRUE	TRUE	TRUE
SE	NA	NA	chr7:43679048:43679280:-@chr7:43670783:43671381:-@chr7:43648055:43649240:-	0.71	0.7	0.92	0.89	0.88	0.97	0.9	0.87	0.0129528	0.0614697	0.0143712	0.357259	0.258461	0.7056	0.9085	0.9305	0.8925	-0.2029	-0.2249	-0.1869	-0.022	0.016	0.2029	0.2249	0.1869	0.022	0.016	TRUE	FALSE	TRUE	FALSE	FALSE	TRUE	FALSE	FALSE	TRUE	FALSE	TRUE	TRUE	FALSE
SE	ENSG00000164828	SUN1	chr7:856252:856310:+@chr7:872142:872238:+@chr7:878435:878623:+	0.65	0.63	0.71	0.74	0.57	0.74	0.74	0.73	0.0271852	0.427303	0.0177002	0.285314	0.26383	0.6406	0.7285	0.6605	0.7425	-0.0879	-0.0199	-0.1019	0.068	-0.014	0.0879	0.0199	0.1019	0.068	0.014	TRUE	FALSE	TRUE	FALSE	FALSE	TRUE	FALSE	FALSE	TRUE	FALSE	TRUE	TRUE	FALSE
SE	ENSG00000165209	STRBP	chr9:125932181:125932325:-@chr9:125930468:125930537:-@chr9:125923256:125923347:-	0.04	0.09	0.18	0.14	0.18	0.13	0.06	0.1	0.0475676	0.0559187	0.283317	0.466398	0.0577218	0.0656	0.1635	0.1605	0.0875	-0.0979	-0.0949	-0.0219	0.003	0.076	0.0979	0.0949	0.0219	0.003	0.076	TRUE	FALSE	FALSE	FALSE	FALSE	TRUE	FALSE	TRUE	TRUE	TRUE	TRUE	TRUE	TRUE
SE	ENSG00000106868	SUSD1	chr9:114820708:114820966:-@chr9:114814679:114814718:-@chr9:114804147:114804240:-	0.56	0.5	0.79	0.79	0.66	0.49	0.74	0.74	0.0366103	0.330576	0.0442877	0.120211	0.000118106	0.5306	0.7935	0.5805	0.7475	-0.2629	-0.0499	-0.2169	0.213	0.046	0.2629	0.0499	0.2169	0.213	0.046	TRUE	FALSE	TRUE	FALSE	FALSE	TRUE	FALSE	FALSE	TRUE	FALSE	TRUE	TRUE	FALSE
SE	ENSG00000107186	MPDZ	chr9:13123152:13123297:-@chr9:13122086:13122169:-@chr9:13121738:13121931:-	0.88	0.9	0.73	0.67	0.49	0.68	0.46	0.83	0.0377292	0.0965418	0.210458	0.218349	0.414766	0.8906	0.7035	0.5905	0.6525	0.1871	0.3001	0.2381	0.113	0.051	0.1871	0.3001	0.2381	0.113	0.051	TRUE	FALSE	FALSE	FALSE	FALSE	TRUE	FALSE	TRUE	TRUE	TRUE	TRUE	TRUE	TRUE
SE	ENSG00000204054	RP11-492E3.1	chr9:132250939:132251578:+@chr9:132255695:132255874:+@chr9:132265602:132265951:+	0.76	0.74	0.58	0.6	0.71	0.71	0.62	0.54	0.00436826	0.0913335	0.0662481	0.0270797	0.452441	0.7506	0.5935	0.7155	0.5875	0.1571	0.0351	0.1631	-0.122	0.006	0.1571	0.0351	0.1631	0.122	0.006	TRUE	FALSE	FALSE	TRUE	FALSE	TRUE	TRUE	TRUE	TRUE	TRUE	TRUE	TRUE	TRUE
SE	ENSG00000157654,ENSG00000241978	PALM2-AKAP2,AKAP2	chr9:112694207:112694308:+@chr9:112704966:112705661:+@chr9:112778234:112778319:+	0.68	0.67	0.73	0.72	0.72	0.75	0.82	0.83	0.0093956	0.0597859	0.00120422	0.288975	0.00270609	0.6756	0.7285	0.7405	0.8325	-0.0529	-0.0649	-0.1569	-0.012	-0.104	0.0529	0.0649	0.1569	0.012	0.104	TRUE	FALSE	TRUE	FALSE	TRUE	TRUE	TRUE	FALSE	TRUE	FALSE	TRUE	TRUE	FALSE
SE	ENSG00000188566	NDOR1	chr9:140108232:140108330:+@chr9:140108419:140108520:+@chr9:140108656:140108865:+	0.91	0.93	0.78	0.8	0.73	0.72	0.61	0.8	0.00630334	0.00603526	0.135596	0.0342939	0.275683	0.9206	0.7935	0.7305	0.7125	0.1271	0.1901	0.2081	0.063	0.081	0.1271	0.1901	0.2081	0.063	0.081	TRUE	TRUE	FALSE	TRUE	FALSE	TRUE	TRUE	FALSE	TRUE	FALSE	TRUE	FALSE	TRUE
SE	ENSG00000204054	RP11-492E3.1	chr9:132250939:132251578:+@chr9:132255698:132255874:+@chr9:132265602:132265951:+	0.86	0.84	0.76	0.75	0.8	0.82	0.77	0.69	0.0202772	0.070399	0.0977821	0.0390997	0.344412	0.8506	0.7585	0.8155	0.7375	0.0921	0.0351	0.1131	-0.057	0.021	0.0921	0.0351	0.1131	0.057	0.021	TRUE	FALSE	FALSE	TRUE	FALSE	TRUE	TRUE	TRUE	TRUE	TRUE	TRUE	TRUE	TRUE
SE	ENSG00000119125	GDA	chr9:74834395:74834422:+@chr9:74838036:74838143:+@chr9:74840593:74840700:+	0.5	0.52	0.59	0.56	0.48	0.42	0.48	0.42	0.0373712	0.14619	0.151489	0.0513741	0.0525294	0.5106	0.5785	0.4555	0.4575	-0.0679	0.0551	0.0531	0.123	0.121	0.0679	0.0551	0.0531	0.123	0.121	TRUE	FALSE	FALSE	FALSE	FALSE	TRUE	FALSE	TRUE	TRUE	TRUE	TRUE	TRUE	TRUE
SE	ENSG00000147853	AK3	chr9:4740937:4741309:-@chr9:4722506:4722625:-@chr9:4719135:4719307:-	0.96	0.93	0.86	0.83	0.92	0.93	0.9	0.92	0.0223125	0.249507	0.143118	0.0399335	0.0353994	0.9456	0.8485	0.9305	0.9175	0.0971	0.0151	0.0281	-0.082	-0.069	0.0971	0.0151	0.0281	0.082	0.069	TRUE	FALSE	FALSE	TRUE	TRUE	TRUE	TRUE	TRUE	TRUE	TRUE	TRUE	TRUE	TRUE
SE	ENSG00000107077	KDM4C	chr9:7103685:7103870:+@chr9:7105402:7105500:+@chr9:7128066:7128236:+	0.08	0.06	0.14	0.12	0.38	0.1	0.08	0.13	0.0236835	0.213877	0.161988	0.284528	0.278894	0.0706	0.1335	0.2455	0.1125	-0.0629	-0.1749	-0.0419	-0.112	0.021	0.0629	0.1749	0.0419	0.112	0.021	TRUE	FALSE	FALSE	FALSE	FALSE	TRUE	FALSE	TRUE	TRUE	TRUE	TRUE	TRUE	TRUE
SE	ENSG00000107140	TESK1	chr9:35606834:35606980:+@chr9:35607324:35607406:+@chr9:35607579:35607669:+	0.61	0.59	0.72	0.75	0.67	0.82	0.8	0.54	0.0127277	0.146161	0.329369	0.450069	0.359879	0.6006	0.7385	0.7505	0.6775	-0.1379	-0.1499	-0.0769	-0.012	0.061	0.1379	0.1499	0.0769	0.012	0.061	TRUE	FALSE	FALSE	FALSE	FALSE	TRUE	FALSE	TRUE	TRUE	TRUE	TRUE	TRUE	TRUE
SE	NA	NA	chr9:130699713:130699802:-@chr9:130698832:130698934:-@chr9:130697374:130698059:-	0.96	0.96	0.9	0.9	0.93	0.91	0.86	0.83	8.95831e-05	0.0838612	0.0423412	0.129364	0.0879886	0.9606	0.9035	0.9255	0.8525	0.0571	0.0351	0.1081	-0.022	0.051	0.0571	0.0351	0.1081	0.022	0.051	TRUE	FALSE	TRUE	FALSE	FALSE	TRUE	FALSE	FALSE	TRUE	FALSE	TRUE	TRUE	FALSE
SE	ENSG00000148187	MRRF	chr9:125054028:125054119:+@chr9:125075506:125075665:+@chr9:125084819:125085742:+	0.93	0.93	0.84	0.84	0.83	0.93	0.88	0.88	4.00281e-05	0.267958	0.000153199	0.279165	0.000129082	0.9306	0.8435	0.8855	0.8875	0.0871	0.0451	0.0431	-0.042	-0.044	0.0871	0.0451	0.0431	0.042	0.044	TRUE	FALSE	FALSE	FALSE	FALSE	TRUE	FALSE	TRUE	TRUE	TRUE	TRUE	TRUE	TRUE
SE	ENSG00000119321	FKBP15	chr9:115973757:115973872:-@chr9:115969492:115969576:-@chr9:115968789:115968858:-	0.72	0.75	0.63	0.65	0.73	0.59	0.72	0.6	0.021947	0.246638	0.22523	0.40256	0.378102	0.7356	0.6435	0.6655	0.6675	0.0921	0.0701	0.0681	-0.022	-0.024	0.0921	0.0701	0.0681	0.022	0.024	TRUE	FALSE	FALSE	FALSE	FALSE	TRUE	FALSE	TRUE	TRUE	TRUE	TRUE	TRUE	TRUE
SE	ENSG00000155621	C9orf85	chr9:74561922:74562028:+@chr9:74586421:74586534:+@chr9:74597573:74599390:+	0.32	0.31	0.52	0.56	0.55	0.24	0.48	0.3	0.021958	0.340051	0.263949	0.261572	0.16998	0.3156	0.5435	0.4005	0.3975	-0.2279	-0.0849	-0.0819	0.143	0.146	0.2279	0.0849	0.0819	0.143	0.146	TRUE	FALSE	FALSE	FALSE	FALSE	TRUE	FALSE	TRUE	TRUE	TRUE	TRUE	TRUE	TRUE
SE	ENSG00000137074	APTX	chr9:32989757:32989893:-@chr9:32988081:32988127:-@chr9:32987542:32987844:-	0.92	0.95	0.84	0.8	0.91	0.78	0.93	0.79	0.0254264	0.202678	0.251376	0.37451	0.319986	0.9356	0.8235	0.8505	0.8675	0.1121	0.0851	0.0681	-0.027	-0.044	0.1121	0.0851	0.0681	0.027	0.044	TRUE	FALSE	FALSE	FALSE	FALSE	TRUE	FALSE	TRUE	TRUE	TRUE	TRUE	TRUE	TRUE
SE	ENSG00000221829	FANCG	chr9:35078602:35078733:-@chr9:35078138:35078340:-@chr9:35077261:35077396:-	0.93	0.92	0.86	0.83	0.84	0.87	0.87	0.88	0.0435269	0.05957	0.0152741	0.314504	0.113183	0.9256	0.8485	0.8605	0.8825	0.0771	0.0651	0.0431	-0.012	-0.034	0.0771	0.0651	0.0431	0.012	0.034	TRUE	FALSE	FALSE	FALSE	FALSE	TRUE	FALSE	TRUE	TRUE	TRUE	TRUE	TRUE	TRUE
SE	ENSG00000160271	RALGDS	chr9:135983375:135983793:-@chr9:135982472:135982687:-@chr9:135982032:135982135:-	0.96	0.97	0.92	0.9	0.89	0.88	0.89	0.95	0.0355705	0.00363752	0.213206	0.104437	0.363676	0.9656	0.9135	0.8905	0.9275	0.0521	0.0751	0.0381	0.023	-0.014	0.0521	0.0751	0.0381	0.023	0.014	TRUE	TRUE	FALSE	FALSE	FALSE	TRUE	FALSE	FALSE	TRUE	FALSE	TRUE	FALSE	TRUE
SE	ENSG00000197646	PDCD1LG2	chr9:5534745:5535050:+@chr9:5549335:5549604:+@chr9:5557618:5557752:+	0.66	0.67	0.54	0.57	0.73	0.63	0.69	0.77	0.0356843	0.378354	0.1618	0.106467	0.0538823	0.6656	0.5585	0.6855	0.7375	0.1071	-0.0199	-0.0719	-0.127	-0.179	0.1071	0.0199	0.0719	0.127	0.179	TRUE	FALSE	FALSE	FALSE	FALSE	TRUE	FALSE	TRUE	TRUE	TRUE	TRUE	TRUE	TRUE
SE	ENSG00000148341	SH3GLB2	chr9:131772050:131772150:-@chr9:131771732:131771746:-@chr9:131771385:131771625:-	0.46	0.44	0.18	0.26	0.25	0.27	0.4	0.3	0.047708	0.00315828	0.150576	0.241269	0.0880609	0.4506	0.2235	0.2655	0.3575	0.2271	0.1851	0.0931	-0.042	-0.134	0.2271	0.1851	0.0931	0.042	0.134	TRUE	TRUE	FALSE	FALSE	FALSE	TRUE	FALSE	FALSE	TRUE	FALSE	TRUE	FALSE	TRUE
SE	ENSG00000041982	TNC	chr9:117815019:117815294:-@chr9:117810539:117810811:-@chr9:117808689:117808961:-	0.68	0.64	0.47	0.53	0.74	0.52	0.73	0.52	0.0318924	0.428513	0.416659	0.215942	0.211704	0.6606	0.5035	0.6355	0.6325	0.1571	0.0251	0.0281	-0.132	-0.129	0.1571	0.0251	0.0281	0.132	0.129	TRUE	FALSE	FALSE	FALSE	FALSE	TRUE	FALSE	TRUE	TRUE	TRUE	TRUE	TRUE	TRUE
SE	ENSG00000106689	LHX2	chr9:126783378:126783583:+@chr9:126784098:126784146:+@chr9:126794699:126795442:+	0.06	0.05	0.14	0.14	0.25	0.19	0.16	0.13	0.0187619	0.0501601	0.0328057	0.109882	0.323166	0.0556	0.1435	0.2255	0.1525	-0.0879	-0.1699	-0.0969	-0.082	-0.009	0.0879	0.1699	0.0969	0.082	0.009	TRUE	FALSE	TRUE	FALSE	FALSE	TRUE	FALSE	FALSE	TRUE	FALSE	TRUE	TRUE	FALSE
SE	ENSG00000185920	PTCH1	chr9:98278751:98279247:-@chr9:98268689:98268881:-@chr9:98247967:98248156:-	0.77	0.75	0.85	0.87	0.74	0.9	0.84	0.87	0.0100075	0.283544	0.0212512	0.35962	0.481419	0.7606	0.8635	0.8255	0.8625	-0.1029	-0.0649	-0.1019	0.038	0.001	0.1029	0.0649	0.1019	0.038	0.001	TRUE	FALSE	TRUE	FALSE	FALSE	TRUE	FALSE	FALSE	TRUE	FALSE	TRUE	TRUE	FALSE
SE	ENSG00000130713	EXOSC2	chr9:133570879:133570980:+@chr9:133572969:133573014:+@chr9:133574716:133574781:+	0.56	0.55	0.65	0.66	0.59	0.61	0.63	0.59	0.00278568	0.0418021	0.0869467	0.0379328	0.13232	0.5556	0.6585	0.6055	0.6175	-0.1029	-0.0499	-0.0619	0.053	0.041	0.1029	0.0499	0.0619	0.053	0.041	TRUE	FALSE	FALSE	TRUE	FALSE	TRUE	TRUE	TRUE	TRUE	TRUE	TRUE	TRUE	TRUE
SE	ENSG00000172889	EGFL7	chr9:139559144:139559237:+@chr9:139562693:139562814:+@chr9:139563009:139563125:+	0.72	0.75	0.65	0.64	0.59	0.75	0.74	0.62	0.041579	0.295205	0.282264	0.397006	0.31523	0.7356	0.6485	0.6755	0.6875	0.0871	0.0601	0.0481	-0.027	-0.039	0.0871	0.0601	0.0481	0.027	0.039	TRUE	FALSE	FALSE	FALSE	FALSE	TRUE	FALSE	TRUE	TRUE	TRUE	TRUE	TRUE	TRUE
SE	ENSG00000106714	CNTNAP3	chr9:39085733:39085820:-@chr9:39078687:39078917:-@chr9:39078382:39078453:-	0.57	0.61	0.37	0.42	0.47	0.4	0.52	0.63	0.0156067	0.0449153	0.454694	0.21916	0.0714897	0.5906	0.3985	0.4405	0.5825	0.1921	0.1501	0.0081	-0.042	-0.184	0.1921	0.1501	0.0081	0.042	0.184	TRUE	TRUE	FALSE	FALSE	FALSE	TRUE	FALSE	FALSE	TRUE	FALSE	TRUE	FALSE	TRUE
SE	ENSG00000204054	RP11-492E3.1	chr9:132250939:132251578:+@chr9:132255757:132255874:+@chr9:132265602:132265951:+	0.57	0.52	0.44	0.39	0.54	0.59	0.5	0.39	0.034661	0.280285	0.154178	0.0251174	0.3238	0.5456	0.4185	0.5705	0.4525	0.1271	-0.0249	0.0931	-0.152	-0.034	0.1271	0.0249	0.0931	0.152	0.034	TRUE	FALSE	FALSE	TRUE	FALSE	TRUE	TRUE	TRUE	TRUE	TRUE	TRUE	TRUE	TRUE
SE	ENSG00000165699	TSC1	chr9:135819930:135820020:-@chr9:135810420:135810482:-@chr9:135804154:135804339:-	0.89	0.91	0.8	0.83	0.84	0.78	0.83	0.86	0.0317455	0.0931585	0.0712625	0.469356	0.130522	0.9006	0.8185	0.8155	0.8525	0.0821	0.0851	0.0481	0.003	-0.034	0.0821	0.0851	0.0481	0.003	0.034	TRUE	FALSE	FALSE	FALSE	FALSE	TRUE	FALSE	TRUE	TRUE	TRUE	TRUE	TRUE	TRUE
SE	ENSG00000198000	NOL8	chr9:95083950:95084028:-@chr9:95082225:95082661:-@chr9:95081503:95081638:-	0.73	0.67	0.52	0.46	0.62	0.34	0.53	0.25	0.0197266	0.178778	0.131428	0.48187	0.307561	0.7006	0.4935	0.4855	0.3975	0.2071	0.2151	0.3031	0.008	0.096	0.2071	0.2151	0.3031	0.008	0.096	TRUE	FALSE	FALSE	FALSE	FALSE	TRUE	FALSE	TRUE	TRUE	TRUE	TRUE	TRUE	TRUE
SE	ENSG00000164330	EBF1	chr5:158139978:158140155:-@chr5:158139162:158139341:-@chr5:158134987:158135181:-	0.82	0.79	0.68	0.68	0.64	0.6	0.81	0.76	0.0397985	0.0106447	0.351153	0.103139	0.0703131	0.8056	0.6835	0.6255	0.7925	0.1221	0.1801	0.0131	0.058	-0.109	0.1221	0.1801	0.0131	0.058	0.109	TRUE	TRUE	FALSE	FALSE	FALSE	TRUE	FALSE	FALSE	TRUE	FALSE	TRUE	FALSE	TRUE
SE	ENSG00000113594	LIFR	chr5:38556436:38556748:-@chr5:38555107:38555167:-@chr5:38530608:38530768:-	0.05	0.04	0.12	0.12	0.08	0.03	0.09	0.08	0.0212067	0.325792	0.0117863	0.117997	0.0442256	0.0456	0.1235	0.0605	0.0925	-0.0779	-0.0149	-0.0469	0.063	0.031	0.0779	0.0149	0.0469	0.063	0.031	TRUE	FALSE	FALSE	FALSE	FALSE	TRUE	FALSE	TRUE	TRUE	TRUE	TRUE	TRUE	TRUE
SE	ENSG00000197603	C5orf42	chr5:37138822:37138950:-@chr5:37125346:37125542:-@chr5:37122532:37122590:-	0.7	0.74	0.57	0.52	0.64	0.64	0.66	0.64	0.0175408	0.0811604	0.0728336	0.0786861	0.053129	0.7206	0.5485	0.6455	0.6575	0.1721	0.0751	0.0631	-0.097	-0.109	0.1721	0.0751	0.0631	0.097	0.109	TRUE	FALSE	FALSE	FALSE	FALSE	TRUE	FALSE	TRUE	TRUE	TRUE	TRUE	TRUE	TRUE
SE	ENSG00000146094	DOK3	chr5:176937921:176938275:-@chr5:176937544:176937582:-@chr5:176936476:176936658:-	0.42	0.46	0.54	0.56	0.62	0.87	0.71	0.37	0.0308331	0.119113	0.32074	0.179825	0.488742	0.4406	0.5535	0.7505	0.5475	-0.1129	-0.3099	-0.1069	-0.197	0.006	0.1129	0.3099	0.1069	0.197	0.006	TRUE	FALSE	FALSE	FALSE	FALSE	TRUE	FALSE	TRUE	TRUE	TRUE	TRUE	TRUE	TRUE
SE	ENSG00000131504	DIAPH1	chr5:140998365:140998622:-@chr5:140967791:140967817:-@chr5:140966609:140966764:-	0.78	0.79	0.84	0.84	0.76	0.78	0.82	0.85	0.0240241	0.252753	0.0730916	0.0484474	0.479495	0.7856	0.8435	0.7755	0.8425	-0.0579	0.0101	-0.0569	0.068	0.001	0.0579	0.0101	0.0569	0.068	0.001	TRUE	FALSE	FALSE	TRUE	FALSE	TRUE	TRUE	TRUE	TRUE	TRUE	TRUE	TRUE	TRUE
SE	ENSG00000035499	DEPDC1B	chr5:59899218:59899394:-@chr5:59894902:59895087:-@chr5:59892739:59893741:-	0.97	0.96	0.91	0.89	0.95	0.95	0.92	0.96	0.0243396	0.155243	0.267816	0.057111	0.120566	0.9656	0.9035	0.9555	0.9475	0.0621	0.0101	0.0181	-0.052	-0.044	0.0621	0.0101	0.0181	0.052	0.044	TRUE	FALSE	FALSE	FALSE	FALSE	TRUE	FALSE	TRUE	TRUE	TRUE	TRUE	TRUE	TRUE
SE	ENSG00000171720	HDAC3	chr5:141016115:141016197:-@chr5:141014378:141014520:-@chr5:141009611:141009692:-	0.54	0.51	0.65	0.62	0.5	0.62	0.61	0.58	0.0168073	0.313889	0.0341984	0.216719	0.110623	0.5256	0.6385	0.5655	0.6025	-0.1129	-0.0399	-0.0769	0.073	0.036	0.1129	0.0399	0.0769	0.073	0.036	TRUE	FALSE	TRUE	FALSE	FALSE	TRUE	FALSE	FALSE	TRUE	FALSE	TRUE	TRUE	FALSE
SE	ENSG00000164329	PAPD4	chr5:78944885:78945013:+@chr5:78952781:78952824:+@chr5:78964715:78964851:+	0.82	0.81	0.87	0.88	0.56	0.65	0.88	0.75	0.00735035	0.0673862	0.466103	0.0514748	0.272148	0.8156	0.8785	0.6105	0.8225	-0.0629	0.2051	-0.0069	0.268	0.056	0.0629	0.2051	0.0069	0.268	0.056	TRUE	FALSE	FALSE	FALSE	FALSE	TRUE	FALSE	TRUE	TRUE	TRUE	TRUE	TRUE	TRUE
SE	ENSG00000158987,ENSG00000217128	RAPGEF6,FNIP1	chr5:130788747:130788870:-@chr5:130785716:130785739:-@chr5:130782176:130782396:-	0.06	0.09	0.17	0.17	0.28	0.32	0.09	0.12	0.0469597	0.00803199	0.112846	0.0489588	0.0790442	0.0756	0.1735	0.3055	0.1125	-0.0979	-0.2299	-0.0369	-0.132	0.061	0.0979	0.2299	0.0369	0.132	0.061	TRUE	TRUE	FALSE	TRUE	FALSE	TRUE	TRUE	FALSE	TRUE	FALSE	TRUE	FALSE	TRUE
SE	ENSG00000155542	SETD9	chr5:56205087:56205570:+@chr5:56206996:56207363:+@chr5:56208838:56208961:+	0.9	0.85	0.73	0.77	0.84	0.82	0.84	0.81	0.0345405	0.169405	0.153879	0.0558915	0.0501813	0.8756	0.7535	0.8355	0.8325	0.1221	0.0401	0.0431	-0.082	-0.079	0.1221	0.0401	0.0431	0.082	0.079	TRUE	FALSE	FALSE	FALSE	FALSE	TRUE	FALSE	TRUE	TRUE	TRUE	TRUE	TRUE	TRUE
SE	ENSG00000145730	PAM	chr5:102296862:102296933:+@chr5:102309820:102310140:+@chr5:102325976:102326105:+	0.65	0.71	0.85	0.88	0.72	0.85	0.89	0.68	0.0272238	0.157385	0.235531	0.218934	0.299415	0.6806	0.8685	0.7905	0.7925	-0.1879	-0.1099	-0.1119	0.078	0.076	0.1879	0.1099	0.1119	0.078	0.076	TRUE	FALSE	FALSE	FALSE	FALSE	TRUE	FALSE	TRUE	TRUE	TRUE	TRUE	TRUE	TRUE
SE	ENSG00000049167	ERCC8	chr5:60194103:60194227:-@chr5:60187864:60189470:-@chr5:60186716:60186913:-	0.29	0.3	0.43	0.47	0.47	0.35	0.42	0.38	0.0351265	0.145856	0.0476695	0.31896	0.122901	0.2956	0.4535	0.4155	0.4075	-0.1579	-0.1199	-0.1119	0.038	0.046	0.1579	0.1199	0.1119	0.038	0.046	TRUE	FALSE	TRUE	FALSE	FALSE	TRUE	FALSE	FALSE	TRUE	FALSE	TRUE	TRUE	FALSE
SE	NA	NA	chr5:159520108:159521072:-@chr5:159507658:159507777:-@chr5:159502892:159505175:-	0.29	0.31	0.14	0.19	0.21	0.15	0.23	0.17	0.0446922	0.0664497	0.0843846	0.353094	0.212233	0.3006	0.1685	0.1855	0.2075	0.1321	0.1151	0.0931	-0.017	-0.039	0.1321	0.1151	0.0931	0.017	0.039	TRUE	FALSE	FALSE	FALSE	FALSE	TRUE	FALSE	TRUE	TRUE	TRUE	TRUE	TRUE	TRUE
SE	ENSG00000161013	MGAT4B	chr5:179233193:179233334:-@chr5:179229804:179230030:-@chr5:179228784:179228969:-	0.31	0.27	0.18	0.22	0.6	0.17	0.2	0.18	0.0474158	0.361262	0.0468117	0.271431	0.412076	0.2906	0.2035	0.3905	0.1975	0.0871	-0.0999	0.0931	-0.187	0.006	0.0871	0.0999	0.0931	0.187	0.006	TRUE	FALSE	TRUE	FALSE	FALSE	TRUE	FALSE	FALSE	TRUE	FALSE	TRUE	TRUE	FALSE
SE	ENSG00000152942	RAD17	chr5:68666862:68666998:+@chr5:68667861:68668044:+@chr5:68669657:68669914:+	0.74	0.76	0.82	0.86	0.89	0.8	0.77	0.85	0.0471088	0.127518	0.167826	0.452058	0.320768	0.7506	0.8435	0.8505	0.8175	-0.0929	-0.0999	-0.0669	-0.007	0.026	0.0929	0.0999	0.0669	0.007	0.026	TRUE	FALSE	FALSE	FALSE	FALSE	TRUE	FALSE	TRUE	TRUE	TRUE	TRUE	TRUE	TRUE
SE	ENSG00000055147	FAM114A2	chr5:153374479:153374532:-@chr5:153374152:153374303:-@chr5:153371269:153372670:-	0.03	0.03	0.09	0.08	0.11	0.07	0.07	0.06	0.0238804	0.0928433	0.0331057	0.39067	0.0642122	0.0306	0.0885	0.0955	0.0725	-0.0579	-0.0649	-0.0419	-0.007	0.016	0.0579	0.0649	0.0419	0.007	0.016	TRUE	FALSE	FALSE	FALSE	FALSE	TRUE	FALSE	TRUE	TRUE	TRUE	TRUE	TRUE	TRUE
SE	ENSG00000172795	DCP2	chr5:112337264:112337371:+@chr5:112339639:112339774:+@chr5:112343635:112343739:+	0.57	0.6	0.76	0.72	0.56	0.65	0.68	0.68	0.013861	0.340937	0.0451376	0.0854379	0.106561	0.5856	0.7435	0.6105	0.6875	-0.1579	-0.0249	-0.1019	0.133	0.056	0.1579	0.0249	0.1019	0.133	0.056	TRUE	FALSE	TRUE	FALSE	FALSE	TRUE	FALSE	FALSE	TRUE	FALSE	TRUE	TRUE	FALSE
SE	ENSG00000145901	TNIP1	chr5:150414563:150414628:-@chr5:150413169:150413360:-@chr5:150411848:150411944:-	0.64	0.67	0.46	0.43	0.4	0.57	0.54	0.5	0.00486481	0.148632	0.0201195	0.354666	0.0460701	0.6556	0.4485	0.4905	0.5275	0.2071	0.1651	0.1281	-0.042	-0.079	0.2071	0.1651	0.1281	0.042	0.079	TRUE	FALSE	TRUE	FALSE	TRUE	TRUE	TRUE	FALSE	TRUE	FALSE	TRUE	TRUE	FALSE
SE	ENSG00000164171	ITGA2	chr5:52285156:52285362:+@chr5:52322578:52322698:+@chr5:52337942:52338051:+	0.76	0.75	0.92	0.91	0.91	0.94	0.84	0.9	0.00108692	0.0180007	0.073459	0.288975	0.201794	0.7556	0.9185	0.9305	0.8775	-0.1629	-0.1749	-0.1219	-0.012	0.041	0.1629	0.1749	0.1219	0.012	0.041	TRUE	TRUE	FALSE	FALSE	FALSE	TRUE	FALSE	FALSE	TRUE	FALSE	TRUE	FALSE	TRUE
SE	ENSG00000112992	NNT	chr5:43677827:43677908:+@chr5:43700221:43700339:+@chr5:43702723:43702838:+	0.86	0.86	0.8	0.81	0.65	0.85	0.8	0.81	0.032844	0.242879	0.0355821	0.345512	0.329128	0.8606	0.8085	0.7555	0.8125	0.0521	0.1051	0.0481	0.053	-0.004	0.0521	0.1051	0.0481	0.053	0.004	TRUE	FALSE	FALSE	FALSE	FALSE	TRUE	FALSE	TRUE	TRUE	TRUE	TRUE	TRUE	TRUE
SE	ENSG00000015479	MATR3	chr5:138611810:138611839:+@chr5:138642928:138644016:+@chr5:138650364:138650425:+	0.62	0.58	0.4	0.45	0.65	0.57	0.47	0.6	0.0188653	0.389216	0.266675	0.0371151	0.153766	0.6006	0.4285	0.6155	0.5425	0.1721	-0.0149	0.0581	-0.187	-0.114	0.1721	0.0149	0.0581	0.187	0.114	TRUE	FALSE	FALSE	TRUE	FALSE	TRUE	TRUE	TRUE	TRUE	TRUE	TRUE	TRUE	TRUE
SE	ENSG00000145734	BDP1	chr5:70858101:70858347:+@chr5:70858602:70858722:+@chr5:70860581:70863649:+	0.19	0.23	0.08	0.12	0.04	0.2	0.22	0.03	0.0318598	0.238359	0.279013	0.41561	0.405572	0.2106	0.1035	0.1255	0.1325	0.1071	0.0851	0.0781	-0.022	-0.029	0.1071	0.0851	0.0781	0.022	0.029	TRUE	FALSE	FALSE	FALSE	FALSE	TRUE	FALSE	TRUE	TRUE	TRUE	TRUE	TRUE	TRUE
SE	ENSG00000205302	SNX2	chr5:122130961:122131078:+@chr5:122135390:122135550:+@chr5:122137564:122137630:+	0.69	0.75	0.54	0.61	0.44	0.69	0.69	0.62	0.0475915	0.218246	0.166001	0.479962	0.115956	0.7206	0.5785	0.5705	0.6625	0.1421	0.1501	0.0581	0.008	-0.084	0.1421	0.1501	0.0581	0.008	0.084	TRUE	FALSE	FALSE	FALSE	FALSE	TRUE	FALSE	TRUE	TRUE	TRUE	TRUE	TRUE	TRUE
SE	ENSG00000164327	RICTOR	chr5:38949814:38950822:-@chr5:38949458:38949529:-@chr5:38947366:38947543:-	0.22	0.24	0.17	0.16	0.12	0.19	0.18	0.17	0.0289989	0.141197	0.0411248	0.429547	0.0794108	0.2306	0.1685	0.1605	0.1825	0.0621	0.0701	0.0481	0.008	-0.014	0.0621	0.0701	0.0481	0.008	0.014	TRUE	FALSE	FALSE	FALSE	FALSE	TRUE	FALSE	TRUE	TRUE	TRUE	TRUE	TRUE	TRUE
SE	ENSG00000156475	PPP2R2B	chr5:146435228:146435700:-@chr5:146257565:146257758:-@chr5:146080608:146080705:-	0.91	0.89	0.83	0.82	0.78	0.77	0.85	0.87	0.028129	0.0141827	0.0772324	0.00856391	0.0636309	0.9006	0.8285	0.7805	0.8675	0.0721	0.1201	0.0331	0.048	-0.039	0.0721	0.1201	0.0331	0.048	0.039	TRUE	TRUE	FALSE	FALSE	FALSE	TRUE	FALSE	FALSE	TRUE	FALSE	TRUE	FALSE	TRUE
SE	ENSG00000152377	SPOCK1	chr5:136834868:136835018:-@chr5:136834062:136834247:-@chr5:136602699:136602744:-	0.63	0.64	0.76	0.74	0.68	0.73	0.72	0.8	0.011196	0.0997969	0.0928808	0.159221	0.394465	0.6356	0.7535	0.7105	0.7675	-0.1179	-0.0749	-0.1319	0.043	-0.014	0.1179	0.0749	0.1319	0.043	0.014	TRUE	FALSE	FALSE	FALSE	FALSE	TRUE	FALSE	TRUE	TRUE	TRUE	TRUE	TRUE	TRUE
SE	ENSG00000145725	PPIP5K2	chr5:102509562:102509676:+@chr5:102512568:102512611:+@chr5:102513368:102513475:+	0.24	0.26	0.15	0.12	0.36	0.33	0.29	0.18	0.0163407	0.0198264	0.453198	0.0046134	0.146052	0.2506	0.1385	0.3505	0.2425	0.1121	-0.0999	0.0081	-0.212	-0.104	0.1121	0.0999	0.0081	0.212	0.104	TRUE	TRUE	FALSE	TRUE	FALSE	TRUE	TRUE	FALSE	TRUE	FALSE	TRUE	FALSE	TRUE
SE	ENSG00000155324	GRAMD3	chr5:125801118:125801237:+@chr5:125805369:125805480:+@chr5:125807930:125807996:+	0.57	0.59	0.66	0.7	0.67	0.54	0.64	0.53	0.0410488	0.361857	0.431777	0.225633	0.160597	0.5806	0.6835	0.6105	0.5925	-0.1029	-0.0299	-0.0119	0.073	0.091	0.1029	0.0299	0.0119	0.073	0.091	TRUE	FALSE	FALSE	FALSE	FALSE	TRUE	FALSE	TRUE	TRUE	TRUE	TRUE	TRUE	TRUE
SE	ENSG00000092199	HNRNPC	chr14:21679969:21680082:-@chr14:21679565:21679725:-@chr14:21677296:21679465:-	0.98	0.97	0.89	0.87	0.94	0.85	0.91	0.9	0.013226	0.168655	0.00672523	0.384123	0.0785546	0.9756	0.8835	0.9005	0.9125	0.0921	0.0751	0.0631	-0.017	-0.029	0.0921	0.0751	0.0631	0.017	0.029	TRUE	FALSE	TRUE	FALSE	FALSE	TRUE	FALSE	FALSE	TRUE	FALSE	TRUE	TRUE	FALSE
SE	NA	NA	chr14:55493844:55494189:+@chr14:55498581:55498709:+@chr14:55509670:55516206:+	0.29	0.23	0.38	0.45	0.34	0.39	0.41	0.38	0.0400501	0.0564954	0.0447997	0.198228	0.367027	0.2606	0.4185	0.3705	0.4025	-0.1579	-0.1099	-0.1419	0.048	0.016	0.1579	0.1099	0.1419	0.048	0.016	TRUE	FALSE	TRUE	FALSE	FALSE	TRUE	FALSE	FALSE	TRUE	FALSE	TRUE	TRUE	FALSE
SE	ENSG00000092036,ENSG00000259132	HAUS4,RP11-298I3.5	chr14:23419523:23419619:-@chr14:23417077:23417222:-@chr14:23416810:23416940:-	0.91	0.89	0.78	0.82	0.79	0.82	0.87	0.84	0.042342	0.0260945	0.0896125	0.406271	0.0785121	0.9006	0.8035	0.8105	0.8625	0.0971	0.0901	0.0381	-0.007	-0.059	0.0971	0.0901	0.0381	0.007	0.059	TRUE	TRUE	FALSE	FALSE	FALSE	TRUE	FALSE	FALSE	TRUE	FALSE	TRUE	FALSE	TRUE
SE	ENSG00000100445	SDR39U1	chr14:24911552:24911658:-@chr14:24911384:24911466:-@chr14:24909989:24910132:-	0.79	0.82	0.61	0.67	0.27	0.47	0.27	0.6	0.0374368	0.069939	0.135078	0.102792	0.216962	0.8056	0.6435	0.3755	0.4425	0.1621	0.4301	0.3631	0.268	0.201	0.1621	0.4301	0.3631	0.268	0.201	TRUE	FALSE	FALSE	FALSE	FALSE	TRUE	FALSE	TRUE	TRUE	TRUE	TRUE	TRUE	TRUE
SE	ENSG00000171723	GPHN	chr14:67389383:67389655:+@chr14:67390911:67391009:+@chr14:67431908:67432042:+	0.9	0.93	0.85	0.83	0.82	0.78	0.89	0.9	0.0345742	0.0262355	0.264529	0.13345	0.0259445	0.9156	0.8435	0.8055	0.9025	0.0721	0.1101	0.0131	0.038	-0.059	0.0721	0.1101	0.0131	0.038	0.059	TRUE	TRUE	FALSE	FALSE	TRUE	TRUE	TRUE	FALSE	TRUE	FALSE	TRUE	FALSE	TRUE
SE	ENSG00000100526	CDKN3	chr14:54875463:54875507:+@chr14:54878202:54878424:+@chr14:54882617:54882648:+	0.5	0.49	0.65	0.63	0.41	0.56	0.39	0.33	0.00629071	0.478543	0.0672083	0.143909	0.0239115	0.4956	0.6435	0.4905	0.3675	-0.1479	0.0051	0.1281	0.153	0.276	0.1479	0.0051	0.1281	0.153	0.276	TRUE	FALSE	FALSE	FALSE	TRUE	TRUE	TRUE	TRUE	TRUE	TRUE	TRUE	TRUE	TRUE
SE	ENSG00000092140	G2E3	chr14:31066626:31066732:+@chr14:31067689:31067805:+@chr14:31070976:31071100:+	0.7	0.7	0.85	0.84	0.62	0.8	0.8	0.8	0.00922754	0.448059	2.70792e-05	0.189944	0.0333141	0.7006	0.8485	0.7155	0.8075	-0.1479	-0.0149	-0.1069	0.133	0.041	0.1479	0.0149	0.1069	0.133	0.041	TRUE	FALSE	TRUE	FALSE	FALSE	TRUE	FALSE	FALSE	TRUE	FALSE	TRUE	TRUE	FALSE
SE	ENSG00000126790	C14orf149	chr14:59942587:59942724:-@chr14:59941157:59941244:-@chr14:59939406:59939808:-	0.07	0.05	0.12	0.1	0.07	0.12	0.16	0.1	0.0324823	0.16976	0.10229	0.350966	0.280881	0.0606	0.1135	0.1005	0.1375	-0.0529	-0.0399	-0.0769	0.013	-0.024	0.0529	0.0399	0.0769	0.013	0.024	TRUE	FALSE	FALSE	FALSE	FALSE	TRUE	FALSE	TRUE	TRUE	TRUE	TRUE	TRUE	TRUE
SE	ENSG00000054654	SYNE2	chr14:64630120:64630299:+@chr14:64632003:64632128:+@chr14:64633951:64634105:+	0.91	0.87	0.77	0.71	0.67	0.65	0.83	0.76	0.0331876	0.0138791	0.0938844	0.102582	0.162979	0.8906	0.7435	0.6655	0.8025	0.1471	0.2251	0.0881	0.078	-0.059	0.1471	0.2251	0.0881	0.078	0.059	TRUE	TRUE	FALSE	FALSE	FALSE	TRUE	FALSE	FALSE	TRUE	FALSE	TRUE	FALSE	TRUE
SE	ENSG00000092199	HNRNPC	chr14:21679969:21680082:-@chr14:21679565:21679722:-@chr14:21677296:21679465:-	0.96	0.93	0.83	0.83	0.91	0.83	0.86	0.87	0.0433141	0.15081	0.0509832	0.240229	0.043486	0.9456	0.8335	0.8755	0.8725	0.1121	0.0701	0.0731	-0.042	-0.039	0.1121	0.0701	0.0731	0.042	0.039	TRUE	FALSE	FALSE	FALSE	FALSE	TRUE	FALSE	TRUE	TRUE	TRUE	TRUE	TRUE	TRUE
SE	ENSG00000092330	TINF2	chr14:24711347:24711880:-@chr14:24711096:24711200:-@chr14:24710881:24710982:-	0.86	0.94	0.66	0.69	0.73	0.85	0.71	0.92	0.039624	0.150779	0.296287	0.144705	0.199449	0.9006	0.6785	0.7955	0.8225	0.2221	0.1051	0.0781	-0.117	-0.144	0.2221	0.1051	0.0781	0.117	0.144	TRUE	FALSE	FALSE	FALSE	FALSE	TRUE	FALSE	TRUE	TRUE	TRUE	TRUE	TRUE	TRUE
SE	ENSG00000185024	BRF1	chr14:105713408:105714222:-@chr14:105707602:105707751:-@chr14:105695157:105695250:-	0.86	0.76	0.5	0.59	0.47	0.59	0.58	0.7	0.0310228	0.0382468	0.0891401	0.44026	0.16473	0.8106	0.5485	0.5355	0.6475	0.2621	0.2751	0.1631	0.013	-0.099	0.2621	0.2751	0.1631	0.013	0.099	TRUE	TRUE	FALSE	FALSE	FALSE	TRUE	FALSE	FALSE	TRUE	FALSE	TRUE	FALSE	TRUE
SE	ENSG00000100889	PCK2	chr14:24571962:24572099:+@chr14:24572369:24572464:+@chr14:24572719:24573339:+	0.94	0.9	0.77	0.69	0.74	0.75	0.79	0.92	0.0418921	0.0300684	0.266675	0.370685	0.129944	0.9206	0.7335	0.7505	0.8625	0.1871	0.1701	0.0581	-0.017	-0.129	0.1871	0.1701	0.0581	0.017	0.129	TRUE	TRUE	FALSE	FALSE	FALSE	TRUE	FALSE	FALSE	TRUE	FALSE	TRUE	FALSE	TRUE
SE	ENSG00000119699	TGFB3	chr14:76427266:76427419:-@chr14:76426612:76426729:-@chr14:76424442:76425688:-	0.05	0.06	0.16	0.16	0.28	0.19	0.09	0.08	0.0127235	0.0735566	0.014562	0.166788	0.0190326	0.0556	0.1635	0.2405	0.0925	-0.1079	-0.1849	-0.0369	-0.077	0.071	0.1079	0.1849	0.0369	0.077	0.071	TRUE	FALSE	FALSE	FALSE	TRUE	TRUE	TRUE	TRUE	TRUE	TRUE	TRUE	TRUE	TRUE
SE	ENSG00000119703	ZC2HC1C	chr14:75537258:75538099:+@chr14:75540274:75540338:+@chr14:75544235:75544799:+	0.19	0.12	0.4	0.5	0.37	0.28	0.16	0.44	0.0249055	0.0485894	0.234496	0.105579	0.239568	0.1556	0.4535	0.3305	0.3075	-0.2979	-0.1749	-0.1519	0.123	0.146	0.2979	0.1749	0.1519	0.123	0.146	TRUE	TRUE	FALSE	FALSE	FALSE	TRUE	FALSE	FALSE	TRUE	FALSE	TRUE	FALSE	TRUE
SE	ENSG00000092020	PPP2R3C	chr14:35579731:35579835:-@chr14:35579025:35579137:-@chr14:35577345:35577442:-	0.6	0.58	0.66	0.65	0.7	0.69	0.63	0.78	0.0304639	0.0159869	0.174543	0.0110988	0.302294	0.5906	0.6585	0.7005	0.7125	-0.0679	-0.1099	-0.1219	-0.042	-0.054	0.0679	0.1099	0.1219	0.042	0.054	TRUE	TRUE	FALSE	FALSE	FALSE	TRUE	FALSE	FALSE	TRUE	FALSE	TRUE	FALSE	TRUE
SE	ENSG00000139990	DCAF5	chr14:69542062:69542128:-@chr14:69529101:69529228:-@chr14:69517637:69522328:-	0.88	0.88	0.77	0.78	0.9	0.82	0.71	0.8	0.0166877	0.383774	0.117044	0.133099	0.392442	0.8806	0.7785	0.8655	0.7625	0.1021	0.0151	0.1181	-0.087	0.016	0.1021	0.0151	0.1181	0.087	0.016	TRUE	FALSE	FALSE	FALSE	FALSE	TRUE	FALSE	TRUE	TRUE	TRUE	TRUE	TRUE	TRUE
SE	ENSG00000100600	LGMN	chr14:93207407:93207524:-@chr14:93200027:93200155:-@chr14:93198994:93199160:-	0.15	0.17	0.23	0.25	0.46	0.3	0.3	0.07	0.0143672	0.106013	0.413553	0.160458	0.366627	0.1606	0.2435	0.3855	0.1925	-0.0829	-0.2249	-0.0319	-0.142	0.051	0.0829	0.2249	0.0319	0.142	0.051	TRUE	FALSE	FALSE	FALSE	FALSE	TRUE	FALSE	TRUE	TRUE	TRUE	TRUE	TRUE	TRUE
SE	ENSG00000100722	ZC3H14	chr14:89044329:89044484:+@chr14:89063078:89063152:+@chr14:89068268:89068427:+	0.83	0.84	0.76	0.77	0.74	0.8	0.81	0.7	0.00618903	0.146699	0.203315	0.42841	0.465136	0.8356	0.7685	0.7755	0.7625	0.0671	0.0601	0.0731	-0.007	0.006	0.0671	0.0601	0.0731	0.007	0.006	TRUE	FALSE	FALSE	FALSE	FALSE	TRUE	FALSE	TRUE	TRUE	TRUE	TRUE	TRUE	TRUE
SE	ENSG00000165533	TTC8	chr14:89310150:89310194:+@chr14:89319315:89319400:+@chr14:89323534:89323621:+	0.57	0.52	0.31	0.37	0.42	0.63	0.51	0.6	0.0194841	0.45507	0.391852	0.155357	0.0355784	0.5456	0.3435	0.5305	0.5625	0.2021	0.0151	-0.0169	-0.187	-0.219	0.2021	0.0151	0.0169	0.187	0.219	TRUE	FALSE	FALSE	FALSE	TRUE	TRUE	TRUE	TRUE	TRUE	TRUE	TRUE	TRUE	TRUE
SE	ENSG00000140105	WARS	chr14:100841113:100841286:-@chr14:100840473:100840602:-@chr14:100835424:100835595:-	0.06	0.04	0.16	0.17	0.22	0.04	0.04	0.15	0.0113902	0.257792	0.259291	0.387573	0.221866	0.0506	0.1685	0.1355	0.1025	-0.1179	-0.0849	-0.0519	0.033	0.066	0.1179	0.0849	0.0519	0.033	0.066	TRUE	FALSE	FALSE	FALSE	FALSE	TRUE	FALSE	TRUE	TRUE	TRUE	TRUE	TRUE	TRUE
SE	ENSG00000100578	KIAA0586	chr14:58894103:58894355:+@chr14:58894990:58895181:+@chr14:58896081:58896151:+	0.32	0.23	0.62	0.53	0.31	0.57	0.69	0.29	0.0206846	0.201515	0.230291	0.243062	0.377514	0.2756	0.5785	0.4455	0.4975	-0.3029	-0.1699	-0.2219	0.133	0.081	0.3029	0.1699	0.2219	0.133	0.081	TRUE	FALSE	FALSE	FALSE	FALSE	TRUE	FALSE	TRUE	TRUE	TRUE	TRUE	TRUE	TRUE
SE	ENSG00000100744	C14orf129	chr14:96829863:96829905:+@chr14:96846025:96846125:+@chr14:96848584:96848842:+	0.88	0.87	0.82	0.82	0.74	0.81	0.8	0.79	0.0318621	0.110429	0.00507974	0.219665	0.0653529	0.8756	0.8235	0.7805	0.8025	0.0521	0.0951	0.0731	0.043	0.021	0.0521	0.0951	0.0731	0.043	0.021	TRUE	FALSE	TRUE	FALSE	FALSE	TRUE	FALSE	FALSE	TRUE	FALSE	TRUE	TRUE	FALSE
SE	ENSG00000100890,ENSG00000258790	RP11-173D9.3,KIAA0391	chr14:35592158:35593437:+@chr14:35595941:35595988:+@chr14:35596685:35596817:+	0.8	0.84	0.93	0.91	0.73	0.81	0.82	0.81	0.0377609	0.227223	0.469446	0.0773219	0.0143356	0.8206	0.9235	0.7755	0.8225	-0.1029	0.0451	-0.0019	0.148	0.101	0.1029	0.0451	0.0019	0.148	0.101	TRUE	FALSE	FALSE	FALSE	TRUE	TRUE	TRUE	TRUE	TRUE	TRUE	TRUE	TRUE	TRUE
SE	ENSG00000080823	MOK	chr14:102698872:102699045:-@chr14:102698044:102698158:-@chr14:102695794:102695994:-	0.51	0.6	0.28	0.34	0.4	0.31	0.33	0.31	0.0289618	0.0451851	0.0552455	0.242799	0.363676	0.5556	0.3135	0.3605	0.3275	0.2421	0.1951	0.2281	-0.047	-0.014	0.2421	0.1951	0.2281	0.047	0.014	TRUE	TRUE	FALSE	FALSE	FALSE	TRUE	FALSE	FALSE	TRUE	FALSE	TRUE	FALSE	TRUE
SE	ENSG00000136305	CIDEB	chr14:24779855:24780576:-@chr14:24779613:24779754:-@chr14:24777685:24778036:-	0.12	0.14	0.24	0.2	0.28	0.18	0.16	0.2	0.0427622	0.135663	0.0887526	0.425871	0.165711	0.1306	0.2235	0.2355	0.1875	-0.0929	-0.1049	-0.0569	-0.012	0.036	0.0929	0.1049	0.0569	0.012	0.036	TRUE	FALSE	FALSE	FALSE	FALSE	TRUE	FALSE	TRUE	TRUE	TRUE	TRUE	TRUE	TRUE
SE	ENSG00000165929	TC2N	chr14:92264129:92264245:-@chr14:92258711:92258902:-@chr14:92253857:92253971:-	0.84	0.83	0.75	0.73	0.74	0.73	0.77	0.71	0.013226	0.00306748	0.09805	0.405611	0.457717	0.8356	0.7435	0.7405	0.7475	0.0921	0.0951	0.0881	0.003	-0.004	0.0921	0.0951	0.0881	0.003	0.004	TRUE	TRUE	FALSE	FALSE	FALSE	TRUE	FALSE	FALSE	TRUE	FALSE	TRUE	FALSE	TRUE
SE	ENSG00000167733,ENSG00000130255	HSD11B1L,RPL36	chr19:5681035:5681282:+@chr19:5684830:5685130:+@chr19:5686911:5687002:+	0.58	0.64	0.43	0.46	0.64	0.19	0.71	0.37	0.03374	0.27578	0.38673	0.460524	0.331665	0.6106	0.4485	0.4205	0.5475	0.1621	0.1901	0.0631	0.028	-0.099	0.1621	0.1901	0.0631	0.028	0.099	TRUE	FALSE	FALSE	FALSE	FALSE	TRUE	FALSE	TRUE	TRUE	TRUE	TRUE	TRUE	TRUE
SE	ENSG00000089351	GRAMD1A	chr19:35502378:35502458:+@chr19:35504160:35504272:+@chr19:35504445:35504595:+	0.56	0.61	0.74	0.75	0.76	0.81	0.52	0.81	0.0414199	0.0143546	0.32842	0.169079	0.346773	0.5856	0.7485	0.7905	0.6725	-0.1629	-0.2049	-0.0869	-0.042	0.076	0.1629	0.2049	0.0869	0.042	0.076	TRUE	TRUE	FALSE	FALSE	FALSE	TRUE	FALSE	FALSE	TRUE	FALSE	TRUE	FALSE	TRUE
SE	NA	NA	chr19:42721784:42721944:-@chr19:42720832:42721197:-@chr19:42719285:42719404:-	0.76	0.72	0.57	0.57	0.68	0.73	0.93	0.45	0.0385911	0.228984	0.443364	0.0585201	0.34793	0.7406	0.5735	0.7105	0.6975	0.1671	0.0301	0.0431	-0.137	-0.124	0.1671	0.0301	0.0431	0.137	0.124	TRUE	FALSE	FALSE	FALSE	FALSE	TRUE	FALSE	TRUE	TRUE	TRUE	TRUE	TRUE	TRUE
SE	ENSG00000081665	ZNF506	chr19:19917751:19917877:-@chr19:19916840:19916935:-@chr19:19903520:19906469:-	0.27	0.29	0.41	0.46	0.54	0.45	0.34	0.39	0.0358299	0.0571458	0.0693736	0.187985	0.104357	0.2806	0.4385	0.5005	0.3725	-0.1579	-0.2199	-0.0919	-0.062	0.066	0.1579	0.2199	0.0919	0.062	0.066	TRUE	FALSE	FALSE	FALSE	FALSE	TRUE	FALSE	TRUE	TRUE	TRUE	TRUE	TRUE	TRUE
SE	ENSG00000182141	ZNF708	chr19:21512012:21512212:-@chr19:21510762:21510943:-@chr19:21492048:21492143:-	0.33	0.34	0.55	0.57	0.36	0.35	0.43	0.22	0.00591599	0.030406	0.490562	0.0071553	0.133865	0.3356	0.5635	0.3605	0.3325	-0.2279	-0.0249	0.0031	0.203	0.231	0.2279	0.0249	0.0031	0.203	0.231	TRUE	FALSE	FALSE	TRUE	FALSE	TRUE	TRUE	TRUE	TRUE	TRUE	TRUE	TRUE	TRUE
SE	ENSG00000198131	ZNF544	chr19:58757667:58757793:+@chr19:58758112:58758160:+@chr19:58772217:58775008:+	0.67	0.71	0.82	0.82	0.86	0.76	0.73	0.82	0.0465179	0.103451	0.130328	0.448997	0.26654	0.6906	0.8235	0.8155	0.7825	-0.1329	-0.1249	-0.0919	0.008	0.041	0.1329	0.1249	0.0919	0.008	0.041	TRUE	FALSE	FALSE	FALSE	FALSE	TRUE	FALSE	TRUE	TRUE	TRUE	TRUE	TRUE	TRUE
SE	ENSG00000161558	TMEM143	chr19:48866548:48866788:-@chr19:48863329:48863440:-@chr19:48846578:48846708:-	0.22	0.12	0.49	0.37	0.42	0.28	0.18	0.3	0.0403751	0.0881256	0.217312	0.242774	0.0798736	0.1706	0.4335	0.3555	0.2475	-0.2629	-0.1849	-0.0769	0.078	0.186	0.2629	0.1849	0.0769	0.078	0.186	TRUE	FALSE	FALSE	FALSE	FALSE	TRUE	FALSE	TRUE	TRUE	TRUE	TRUE	TRUE	TRUE
SE	ENSG00000087088	BAX	chr19:49458117:49458219:+@chr19:49458805:49458856:+@chr19:49458944:49459090:+	0.7	0.76	0.89	0.84	0.75	0.86	0.69	0.79	0.0366156	0.181897	0.402768	0.238268	0.105239	0.7306	0.8685	0.8105	0.7475	-0.1379	-0.0799	-0.0169	0.058	0.121	0.1379	0.0799	0.0169	0.058	0.121	TRUE	FALSE	FALSE	FALSE	FALSE	TRUE	FALSE	TRUE	TRUE	TRUE	TRUE	TRUE	TRUE
SE	NA	NA	chr19:49496252:49496610:-@chr19:49494559:49494795:-@chr19:49490451:49490642:-	0.76	0.7	0.57	0.61	0.73	0.71	0.61	0.69	0.0394359	0.447772	0.147336	0.0294481	0.166107	0.7306	0.5935	0.7255	0.6575	0.1371	0.0051	0.0731	-0.132	-0.064	0.1371	0.0051	0.0731	0.132	0.064	TRUE	FALSE	FALSE	TRUE	FALSE	TRUE	TRUE	TRUE	TRUE	TRUE	TRUE	TRUE	TRUE
SE	ENSG00000105223	PLD3	chr19:40871460:40871492:+@chr19:40871625:40871837:+@chr19:40872326:40872417:+	0.47	0.49	0.59	0.56	0.43	0.54	0.47	0.53	0.0205076	0.443989	0.267604	0.17297	0.109319	0.4806	0.5785	0.4905	0.5075	-0.0979	-0.0099	-0.0269	0.088	0.071	0.0979	0.0099	0.0269	0.088	0.071	TRUE	FALSE	FALSE	FALSE	FALSE	TRUE	FALSE	TRUE	TRUE	TRUE	TRUE	TRUE	TRUE
SE	NA	NA	chr19:44732599:44732725:+@chr19:44733886:44733969:+@chr19:44738855:44741421:+	0.75	0.78	0.84	0.82	0.8	0.79	0.82	0.72	0.0380498	0.114934	0.425639	0.0665659	0.228238	0.7656	0.8335	0.8005	0.7775	-0.0679	-0.0349	-0.0119	0.033	0.056	0.0679	0.0349	0.0119	0.033	0.056	TRUE	FALSE	FALSE	FALSE	FALSE	TRUE	FALSE	TRUE	TRUE	TRUE	TRUE	TRUE	TRUE
SE	ENSG00000053501	USE1	chr19:17329173:17329200:+@chr19:17330022:17330196:+@chr19:17330440:17330638:+	0.82	0.8	0.67	0.66	0.81	0.51	0.58	0.77	0.0112978	0.254518	0.202915	0.493614	0.453677	0.8106	0.6685	0.6655	0.6825	0.1421	0.1451	0.1281	0.003	-0.014	0.1421	0.1451	0.1281	0.003	0.014	TRUE	FALSE	FALSE	FALSE	FALSE	TRUE	FALSE	TRUE	TRUE	TRUE	TRUE	TRUE	TRUE
SE	ENSG00000105607	GCDH	chr19:13002085:13002209:+@chr19:13002301:13002336:+@chr19:13002645:13002788:+	0.91	0.87	0.75	0.74	0.83	0.89	0.89	0.87	0.0393608	0.286678	0.453716	0.0779236	0.00912122	0.8906	0.7485	0.8655	0.8875	0.1421	0.0251	0.0031	-0.117	-0.139	0.1421	0.0251	0.0031	0.117	0.139	TRUE	FALSE	FALSE	FALSE	TRUE	TRUE	TRUE	TRUE	TRUE	TRUE	TRUE	TRUE	TRUE
SE	ENSG00000105132,ENSG00000251369	ZNF550,AC003682.1	chr19:58057825:58059361:-@chr19:58055019:58055951:-@chr19:58053208:58054611:-	0.43	0.44	0.36	0.33	0.38	0.27	0.29	0.32	0.0407155	0.151384	0.0303776	0.399045	0.116252	0.4356	0.3485	0.3305	0.3125	0.0871	0.1051	0.1231	0.018	0.036	0.0871	0.1051	0.1231	0.018	0.036	TRUE	FALSE	TRUE	FALSE	FALSE	TRUE	FALSE	FALSE	TRUE	FALSE	TRUE	TRUE	FALSE
SE	ENSG00000197808	ZNF461	chr19:37147350:37147445:-@chr19:37134696:37134764:-@chr19:37128283:37130945:-	0.68	0.66	0.46	0.43	0.57	0.5	0.3	0.24	0.00456297	0.070647	0.0145124	0.095758	0.032574	0.6706	0.4485	0.5405	0.2775	0.2221	0.1301	0.3931	-0.092	0.171	0.2221	0.1301	0.3931	0.092	0.171	TRUE	FALSE	TRUE	FALSE	TRUE	TRUE	TRUE	FALSE	TRUE	FALSE	TRUE	TRUE	FALSE
SE	ENSG00000123159	GIPC1	chr19:14606849:14606944:-@chr19:14602468:14602558:-@chr19:14591405:14591590:-	0.13	0.11	0.2	0.17	0.07	0.14	0.08	0.13	0.036439	0.412533	0.404044	0.119918	0.076861	0.1206	0.1885	0.1105	0.1125	-0.0679	0.0101	0.0081	0.078	0.076	0.0679	0.0101	0.0081	0.078	0.076	TRUE	FALSE	FALSE	FALSE	FALSE	TRUE	FALSE	TRUE	TRUE	TRUE	TRUE	TRUE	TRUE
SE	ENSG00000105486	LIG1	chr19:48660271:48660397:-@chr19:48657129:48657224:-@chr19:48654489:48654596:-	0.91	0.89	0.78	0.76	0.77	0.83	0.87	0.79	0.00618503	0.0845149	0.171767	0.23851	0.170541	0.9006	0.7735	0.8055	0.8375	0.1271	0.0951	0.0631	-0.032	-0.064	0.1271	0.0951	0.0631	0.032	0.064	TRUE	FALSE	FALSE	FALSE	FALSE	TRUE	FALSE	TRUE	TRUE	TRUE	TRUE	TRUE	TRUE
SE	ENSG00000105221	AKT2	chr19:40747845:40747976:-@chr19:40745952:40746017:-@chr19:40744812:40744880:-	0.78	0.76	0.83	0.82	0.79	0.84	0.82	0.78	0.037598	0.135784	0.136782	0.403442	0.235534	0.7706	0.8285	0.8205	0.8075	-0.0579	-0.0499	-0.0369	0.008	0.021	0.0579	0.0499	0.0369	0.008	0.021	TRUE	FALSE	FALSE	FALSE	FALSE	TRUE	FALSE	TRUE	TRUE	TRUE	TRUE	TRUE	TRUE
SE	ENSG00000105676	ARMC6	chr19:19144387:19144739:+@chr19:19144940:19145047:+@chr19:19148361:19148516:+	0.65	0.7	0.41	0.38	0.54	0.39	0.44	0.19	0.00997272	0.097716	0.10243	0.253843	0.325412	0.6756	0.3985	0.4705	0.3225	0.2771	0.2051	0.3531	-0.072	0.076	0.2771	0.2051	0.3531	0.072	0.076	TRUE	FALSE	FALSE	FALSE	FALSE	TRUE	FALSE	TRUE	TRUE	TRUE	TRUE	TRUE	TRUE
SE	ENSG00000010361	FUZ	chr19:50316253:50316567:-@chr19:50315872:50315993:-@chr19:50315508:50315592:-	0.72	0.77	0.61	0.58	0.73	0.5	0.67	0.74	0.0271377	0.233466	0.265981	0.43967	0.0774457	0.7456	0.5985	0.6205	0.7125	0.1471	0.1251	0.0331	-0.022	-0.114	0.1471	0.1251	0.0331	0.022	0.114	TRUE	FALSE	FALSE	FALSE	FALSE	TRUE	FALSE	TRUE	TRUE	TRUE	TRUE	TRUE	TRUE
SE	ENSG00000105136	ZNF419	chr19:57999079:57999351:+@chr19:58001515:58001553:+@chr19:58002839:58002965:+	0.29	0.21	0.44	0.38	0.44	0.27	0.49	0.3	0.046486	0.199727	0.164883	0.321683	0.463614	0.2506	0.4135	0.3605	0.4025	-0.1629	-0.1099	-0.1519	0.053	0.011	0.1629	0.1099	0.1519	0.053	0.011	TRUE	FALSE	FALSE	FALSE	FALSE	TRUE	FALSE	TRUE	TRUE	TRUE	TRUE	TRUE	TRUE
SE	ENSG00000127511	SIN3B	chr19:16973163:16973370:+@chr19:16973695:16973790:+@chr19:16974491:16974607:+	0.05	0.07	0.1	0.12	0.1	0.07	0.08	0.1	0.033062	0.123138	0.0615053	0.169031	0.196978	0.0606	0.1135	0.0905	0.0975	-0.0529	-0.0299	-0.0369	0.023	0.016	0.0529	0.0299	0.0369	0.023	0.016	TRUE	FALSE	FALSE	FALSE	FALSE	TRUE	FALSE	TRUE	TRUE	TRUE	TRUE	TRUE	TRUE
SE	ENSG00000214046	C19orf42	chr19:16770206:16770258:-@chr19:16764846:16764936:-@chr19:16756959:16758072:-	0.87	0.85	0.81	0.79	0.64	0.9	0.81	0.76	0.0282858	0.315971	0.0909677	0.432755	0.367185	0.8606	0.8035	0.7755	0.7925	0.0571	0.0851	0.0681	0.028	0.011	0.0571	0.0851	0.0681	0.028	0.011	TRUE	FALSE	FALSE	FALSE	FALSE	TRUE	FALSE	TRUE	TRUE	TRUE	TRUE	TRUE	TRUE
SE	ENSG00000121417	ZNF211	chr19:58144535:58144804:+@chr19:58145391:58145429:+@chr19:58145997:58146123:+	0.29	0.33	0.51	0.54	0.47	0.77	0.43	0.52	0.00753929	0.139726	0.0621509	0.317623	0.244433	0.3106	0.5285	0.6255	0.4825	-0.2179	-0.3149	-0.1719	-0.097	0.046	0.2179	0.3149	0.1719	0.097	0.046	TRUE	FALSE	FALSE	FALSE	FALSE	TRUE	FALSE	TRUE	TRUE	TRUE	TRUE	TRUE	TRUE
SE	ENSG00000099875	MKNK2	chr19:2046366:2046467:-@chr19:2046185:2046282:-@chr19:2043502:2043581:-	0.87	0.85	0.78	0.76	0.78	0.81	0.79	0.78	0.012834	0.0501829	0.0303453	0.149701	0.130091	0.8606	0.7735	0.8005	0.7925	0.0871	0.0601	0.0681	-0.027	-0.019	0.0871	0.0601	0.0681	0.027	0.019	TRUE	FALSE	TRUE	FALSE	FALSE	TRUE	FALSE	FALSE	TRUE	FALSE	TRUE	TRUE	FALSE
SE	NA	NA	chr19:30199161:30199330:-@chr19:30196181:30196301:-@chr19:30189793:30193884:-	0.07	0.13	0.23	0.31	0.46	0.32	0.18	0.44	0.0423299	0.0539224	0.167326	0.148284	0.39738	0.1006	0.2735	0.3955	0.3175	-0.1729	-0.2949	-0.2169	-0.122	-0.044	0.1729	0.2949	0.2169	0.122	0.044	TRUE	FALSE	FALSE	FALSE	FALSE	TRUE	FALSE	TRUE	TRUE	TRUE	TRUE	TRUE	TRUE
SE	ENSG00000126456	IRF3	chr19:50168888:50169132:-@chr19:50167931:50168103:-@chr19:50166600:50166771:-	0.85	0.86	0.6	0.64	0.65	0.82	0.7	0.64	0.0230787	0.203116	0.048921	0.196498	0.142931	0.8556	0.6235	0.7405	0.6775	0.2321	0.1151	0.1781	-0.117	-0.054	0.2321	0.1151	0.1781	0.117	0.054	TRUE	FALSE	TRUE	FALSE	FALSE	TRUE	FALSE	FALSE	TRUE	FALSE	TRUE	TRUE	FALSE
SE	ENSG00000213020	ZNF611	chr19:53217268:53217394:-@chr19:53210645:53210791:-@chr19:53206066:53210117:-	0.1	0.09	0.17	0.16	0.21	0.14	0.11	0.15	0.00510641	0.119483	0.13697	0.393542	0.181667	0.0956	0.1685	0.1805	0.1375	-0.0729	-0.0849	-0.0419	-0.012	0.031	0.0729	0.0849	0.0419	0.012	0.031	TRUE	FALSE	FALSE	FALSE	FALSE	TRUE	FALSE	TRUE	TRUE	TRUE	TRUE	TRUE	TRUE
SE	NA	NA	chr19:12662144:12662356:-@chr19:12661277:12661466:-@chr19:12639384:12639510:-	0.11	0.12	0.17	0.16	0.26	0.17	0.16	0.22	0.00724889	0.12622	0.110232	0.22461	0.257082	0.1156	0.1685	0.2205	0.1975	-0.0529	-0.1049	-0.0819	-0.052	-0.029	0.0529	0.1049	0.0819	0.052	0.029	TRUE	FALSE	FALSE	FALSE	FALSE	TRUE	FALSE	TRUE	TRUE	TRUE	TRUE	TRUE	TRUE
SE	ENSG00000177380	PPFIA3	chr19:49639981:49640168:+@chr19:49641462:49641684:+@chr19:49642925:49643088:+	0.79	0.78	0.65	0.64	0.73	0.79	0.8	0.85	0.0015163	0.314148	0.153566	0.0779236	0.0398823	0.7856	0.6485	0.7655	0.8325	0.1371	0.0201	-0.0469	-0.117	-0.184	0.1371	0.0201	0.0469	0.117	0.184	TRUE	FALSE	FALSE	FALSE	TRUE	TRUE	TRUE	TRUE	TRUE	TRUE	TRUE	TRUE	TRUE
SE	NA	NA	chr17:79520100:79520153:-@chr17:79518954:79519078:-@chr17:79517274:79518229:-	0.25	0.2	0.13	0.1	0.16	0.12	0.1	0.1	0.0469177	0.0688597	0.0673732	0.195125	0.293387	0.2256	0.1185	0.1455	0.1075	0.1071	0.0801	0.1181	-0.027	0.011	0.1071	0.0801	0.1181	0.027	0.011	TRUE	FALSE	FALSE	FALSE	FALSE	TRUE	FALSE	TRUE	TRUE	TRUE	TRUE	TRUE	TRUE
SE	ENSG00000172660	TAF15	chr17:34151082:34151202:+@chr17:34160911:34160945:+@chr17:34161570:34161602:+	0.6	0.62	0.52	0.53	0.46	0.53	0.53	0.64	0.0159427	0.0895264	0.399846	0.286808	0.226739	0.6106	0.5285	0.5005	0.5925	0.0821	0.1101	0.0181	0.028	-0.064	0.0821	0.1101	0.0181	0.028	0.064	TRUE	FALSE	FALSE	FALSE	FALSE	TRUE	FALSE	TRUE	TRUE	TRUE	TRUE	TRUE	TRUE
SE	ENSG00000169992	NLGN2	chr17:7311502:7312031:+@chr17:7315476:7315526:+@chr17:7317663:7317812:+	0.93	0.95	0.87	0.88	0.73	0.88	0.91	0.8	0.024573	0.165573	0.191218	0.266405	0.409166	0.9406	0.8785	0.8105	0.8625	0.0621	0.1301	0.0781	0.068	0.016	0.0621	0.1301	0.0781	0.068	0.016	TRUE	FALSE	FALSE	FALSE	FALSE	TRUE	FALSE	TRUE	TRUE	TRUE	TRUE	TRUE	TRUE
SE	ENSG00000175662	TOM1L2	chr17:17796975:17797124:-@chr17:17787948:17788082:-@chr17:17786019:17786177:-	0.78	0.77	0.87	0.84	0.76	0.8	0.8	0.81	0.0398069	0.357062	0.0204983	0.0568446	0.0804152	0.7756	0.8585	0.7855	0.8125	-0.0829	-0.0099	-0.0369	0.073	0.046	0.0829	0.0099	0.0369	0.073	0.046	TRUE	FALSE	FALSE	FALSE	FALSE	TRUE	FALSE	TRUE	TRUE	TRUE	TRUE	TRUE	TRUE
SE	ENSG00000171634	BPTF	chr17:65870933:65871136:+@chr17:65882244:65882432:+@chr17:65887960:65888150:+	0.44	0.46	0.38	0.36	0.46	0.46	0.33	0.46	0.0146747	0.181905	0.29794	0.0324218	0.367373	0.4506	0.3735	0.4655	0.4025	0.0771	-0.0149	0.0481	-0.092	-0.029	0.0771	0.0149	0.0481	0.092	0.029	TRUE	FALSE	FALSE	TRUE	FALSE	TRUE	TRUE	TRUE	TRUE	TRUE	TRUE	TRUE	TRUE
SE	ENSG00000166484	MAPK7	chr17:19281034:19281414:+@chr17:19285094:19285779:+@chr17:19286126:19286259:+	0.89	0.9	0.81	0.82	0.86	0.89	0.84	0.91	0.00474543	0.251163	0.387555	0.062656	0.158469	0.8956	0.8185	0.8805	0.8825	0.0771	0.0151	0.0131	-0.062	-0.064	0.0771	0.0151	0.0131	0.062	0.064	TRUE	FALSE	FALSE	FALSE	FALSE	TRUE	FALSE	TRUE	TRUE	TRUE	TRUE	TRUE	TRUE
SE	ENSG00000181350	FAM211A	chr17:16351159:16351274:-@chr17:16350194:16350345:-@chr17:16345328:16347445:-	0.3	0.32	0.37	0.38	0.35	0.3	0.39	0.39	0.0214131	0.281265	0.034688	0.144445	0.0884259	0.3106	0.3785	0.3305	0.3975	-0.0679	-0.0199	-0.0869	0.048	-0.019	0.0679	0.0199	0.0869	0.048	0.019	TRUE	FALSE	TRUE	FALSE	FALSE	TRUE	FALSE	FALSE	TRUE	FALSE	TRUE	TRUE	FALSE
SE	ENSG00000167740	CYB5D2	chr17:4053185:4053325:+@chr17:4054238:4054316:+@chr17:4057968:4058154:+	0.05	0.05	0.1	0.11	0.16	0.05	0.04	0.04	0.0295422	0.234983	0.0219942	0.488338	0.0277096	0.0506	0.1085	0.1105	0.0475	-0.0579	-0.0599	0.0031	-0.002	0.061	0.0579	0.0599	0.0031	0.002	0.061	TRUE	FALSE	FALSE	FALSE	TRUE	TRUE	TRUE	TRUE	TRUE	TRUE	TRUE	TRUE	TRUE
SE	ENSG00000125450	NUP85	chr17:73222146:73222252:+@chr17:73227435:73227518:+@chr17:73227668:73227733:+	0.76	0.79	0.68	0.71	0.61	0.69	0.77	0.72	0.0344462	0.0881471	0.259556	0.235677	0.113103	0.7756	0.6985	0.6555	0.7525	0.0771	0.1201	0.0231	0.043	-0.054	0.0771	0.1201	0.0231	0.043	0.054	TRUE	FALSE	FALSE	FALSE	FALSE	TRUE	FALSE	TRUE	TRUE	TRUE	TRUE	TRUE	TRUE
SE	ENSG00000125450	NUP85	chr17:73211849:73211918:+@chr17:73214280:73214401:+@chr17:73221198:73221332:+	0.83	0.84	0.73	0.74	0.66	0.78	0.66	0.75	0.00304749	0.159246	0.111198	0.432676	0.334655	0.8356	0.7385	0.7255	0.7125	0.0971	0.1101	0.1231	0.013	0.026	0.0971	0.1101	0.1231	0.013	0.026	TRUE	FALSE	FALSE	FALSE	FALSE	TRUE	FALSE	TRUE	TRUE	TRUE	TRUE	TRUE	TRUE
SE	NA	NA	chr17:5329556:5329619:+@chr17:5331391:5331531:+@chr17:5335862:5336340:+	0.52	0.56	0.36	0.4	0.41	0.45	0.34	0.48	0.0156102	0.0329638	0.158019	0.107365	0.357384	0.5406	0.3835	0.4355	0.4175	0.1571	0.1051	0.1231	-0.052	-0.034	0.1571	0.1051	0.1231	0.052	0.034	TRUE	TRUE	FALSE	FALSE	FALSE	TRUE	FALSE	FALSE	TRUE	FALSE	TRUE	FALSE	TRUE
SE	ENSG00000141503	MINK1	chr17:4795444:4795529:+@chr17:4795697:4795807:+@chr17:4795951:4796063:+	0.73	0.74	0.56	0.54	0.48	0.72	0.69	0.67	0.00599563	0.237723	0.0397229	0.370333	0.00495164	0.7356	0.5535	0.6055	0.6875	0.1821	0.1301	0.0481	-0.052	-0.134	0.1821	0.1301	0.0481	0.052	0.134	TRUE	FALSE	FALSE	FALSE	TRUE	TRUE	TRUE	TRUE	TRUE	TRUE	TRUE	TRUE	TRUE
SE	ENSG00000121067	SPOP	chr17:47699308:47699429:-@chr17:47697983:47698032:-@chr17:47696596:47696747:-	0.12	0.1	0.17	0.16	0.23	0.09	0.14	0.25	0.037598	0.286606	0.169338	0.486275	0.324972	0.1106	0.1685	0.1655	0.2025	-0.0579	-0.0549	-0.0919	0.003	-0.034	0.0579	0.0549	0.0919	0.003	0.034	TRUE	FALSE	FALSE	FALSE	FALSE	TRUE	FALSE	TRUE	TRUE	TRUE	TRUE	TRUE	TRUE
SE	ENSG00000262304	RP11-235E17.2	chr17:3512603:3512705:-@chr17:3511721:3511859:-@chr17:3495361:3495677:-	0.44	0.48	0.59	0.6	0.41	0.3	0.52	0.73	0.0358291	0.147022	0.171732	0.0701159	0.400776	0.4606	0.5985	0.3605	0.6325	-0.1379	0.1001	-0.1719	0.238	-0.034	0.1379	0.1001	0.1719	0.238	0.034	TRUE	FALSE	FALSE	FALSE	FALSE	TRUE	FALSE	TRUE	TRUE	TRUE	TRUE	TRUE	TRUE
SE	ENSG00000125454	SLC25A19	chr17:73285435:73285530:-@chr17:73282714:73282883:-@chr17:73282385:73282540:-	0.93	0.92	0.86	0.88	0.87	0.91	0.91	0.89	0.0393271	0.184673	0.135265	0.234133	0.0697934	0.9256	0.8735	0.8955	0.9075	0.0521	0.0301	0.0181	-0.022	-0.034	0.0521	0.0301	0.0181	0.022	0.034	TRUE	FALSE	FALSE	FALSE	FALSE	TRUE	FALSE	TRUE	TRUE	TRUE	TRUE	TRUE	TRUE
SE	NA	NA	chr17:5329291:5329402:+@chr17:5331391:5331531:+@chr17:5335862:5336340:+	0.48	0.54	0.28	0.37	0.4	0.4	0.39	0.5	0.0481705	0.0873398	0.238962	0.169871	0.115469	0.5106	0.3285	0.4055	0.4525	0.1821	0.1051	0.0581	-0.077	-0.124	0.1821	0.1051	0.0581	0.077	0.124	TRUE	FALSE	FALSE	FALSE	FALSE	TRUE	FALSE	TRUE	TRUE	TRUE	TRUE	TRUE	TRUE
SE	ENSG00000129255	MPDU1	chr17:7489050:7489115:+@chr17:7489264:7489396:+@chr17:7490010:7490095:+	0.6	0.56	0.49	0.45	0.52	0.5	0.54	0.54	0.0315738	0.0746802	0.175746	0.119186	0.0819123	0.5806	0.4735	0.5155	0.5475	0.1071	0.0651	0.0331	-0.042	-0.074	0.1071	0.0651	0.0331	0.042	0.074	TRUE	FALSE	FALSE	FALSE	FALSE	TRUE	FALSE	TRUE	TRUE	TRUE	TRUE	TRUE	TRUE
SE	ENSG00000125457	MIF4GD	chr17:73264164:73264273:-@chr17:73263827:73263982:-@chr17:73263619:73263711:-	0.78	0.78	0.68	0.68	0.72	0.69	0.65	0.71	3.25318e-05	0.0648105	0.100746	0.156728	0.458492	0.7806	0.6835	0.7105	0.6875	0.0971	0.0701	0.0931	-0.027	-0.004	0.0971	0.0701	0.0931	0.027	0.004	TRUE	FALSE	FALSE	FALSE	FALSE	TRUE	FALSE	TRUE	TRUE	TRUE	TRUE	TRUE	TRUE
SE	ENSG00000108591	DRG2	chr17:18001584:18001673:+@chr17:18002331:18002391:+@chr17:18002947:18003037:+	0.71	0.7	0.61	0.6	0.66	0.62	0.51	0.7	0.00294719	0.0897163	0.253892	0.148472	0.486679	0.7056	0.6085	0.6455	0.6125	0.0971	0.0601	0.0931	-0.037	-0.004	0.0971	0.0601	0.0931	0.037	0.004	TRUE	FALSE	FALSE	FALSE	FALSE	TRUE	FALSE	TRUE	TRUE	TRUE	TRUE	TRUE	TRUE
SE	ENSG00000109083	IFT20	chr17:26662366:26662515:-@chr17:26659172:26659207:-@chr17:26658885:26659013:-	0.09	0.08	0.16	0.19	0.2	0.09	0.13	0.1	0.0389709	0.221649	0.103829	0.349191	0.0595844	0.0856	0.1785	0.1505	0.1225	-0.0929	-0.0649	-0.0369	0.028	0.056	0.0929	0.0649	0.0369	0.028	0.056	TRUE	FALSE	FALSE	FALSE	FALSE	TRUE	FALSE	TRUE	TRUE	TRUE	TRUE	TRUE	TRUE
SE	ENSG00000141542	RAB40B	chr17:80617456:80617533:-@chr17:80616367:80616589:-@chr17:80614943:80616010:-	0.69	0.61	0.36	0.45	0.2	0.36	0.71	0.5	0.0295412	0.0452655	0.390392	0.171661	0.134988	0.6506	0.4085	0.2855	0.6125	0.2421	0.3651	0.0381	0.123	-0.204	0.2421	0.3651	0.0381	0.123	0.204	TRUE	TRUE	FALSE	FALSE	FALSE	TRUE	FALSE	FALSE	TRUE	FALSE	TRUE	FALSE	TRUE
SE	ENSG00000010244	ZNF207	chr17:30692349:30692506:+@chr17:30693684:30693776:+@chr17:30694791:30695033:+	0.18	0.19	0.12	0.13	0.09	0.04	0.11	0.11	0.00841314	0.0617443	0.0203602	0.120743	0.146528	0.1856	0.1285	0.0705	0.1175	0.0571	0.1151	0.0681	0.058	0.011	0.0571	0.1151	0.0681	0.058	0.011	TRUE	FALSE	TRUE	FALSE	FALSE	TRUE	FALSE	FALSE	TRUE	FALSE	TRUE	TRUE	FALSE
SE	ENSG00000002919	SNX11	chr17:46189936:46190022:+@chr17:46190663:46190763:+@chr17:46196066:46196161:+	0.55	0.57	0.68	0.64	0.54	0.56	0.67	0.6	0.0371066	0.377268	0.117482	0.0325411	0.330528	0.5606	0.6635	0.5555	0.6425	-0.1029	0.0051	-0.0819	0.108	0.021	0.1029	0.0051	0.0819	0.108	0.021	TRUE	FALSE	FALSE	TRUE	FALSE	TRUE	TRUE	TRUE	TRUE	TRUE	TRUE	TRUE	TRUE
SE	ENSG00000087157	PGS1	chr17:76388557:76388746:+@chr17:76392389:76392466:+@chr17:76394333:76394432:+	0.84	0.88	0.72	0.68	0.65	0.74	0.89	0.9	0.0148028	0.0679492	0.13026	0.479683	0.0233606	0.8606	0.7035	0.7005	0.9025	0.1571	0.1601	-0.0419	0.003	-0.199	0.1571	0.1601	0.0419	0.003	0.199	TRUE	FALSE	FALSE	FALSE	TRUE	TRUE	TRUE	TRUE	TRUE	TRUE	TRUE	TRUE	TRUE
SE	ENSG00000108848	LUC7L3	chr17:48826580:48826705:+@chr17:48827862:48828002:+@chr17:48828108:48828213:+	0.85	0.83	0.74	0.77	0.6	0.71	0.73	0.67	0.0304221	0.0900761	0.0544732	0.156347	0.151129	0.8406	0.7585	0.6605	0.7075	0.0821	0.1801	0.1331	0.098	0.051	0.0821	0.1801	0.1331	0.098	0.051	TRUE	FALSE	FALSE	FALSE	FALSE	TRUE	FALSE	TRUE	TRUE	TRUE	TRUE	TRUE	TRUE
SE	ENSG00000197681,ENSG00000174093	TBC1D3,RP11-1407O15.2	chr17:36341112:36341206:-@chr17:36340099:36340727:-@chr17:36339576:36339728:-	0.58	0.56	0.65	0.62	0.61	0.67	0.6	0.48	0.036439	0.109826	0.382277	0.430703	0.179093	0.5706	0.6385	0.6455	0.5475	-0.0679	-0.0749	0.0231	-0.007	0.091	0.0679	0.0749	0.0231	0.007	0.091	TRUE	FALSE	FALSE	FALSE	FALSE	TRUE	FALSE	TRUE	TRUE	TRUE	TRUE	TRUE	TRUE
SE	ENSG00000013306	SLC25A39	chr17:42400652:42400711:-@chr17:42400176:42400220:-@chr17:42399787:42399896:-	0.79	0.78	0.84	0.84	0.79	0.75	0.73	0.79	0.0286388	0.348083	0.329314	0.0887924	0.121441	0.7856	0.8435	0.7755	0.7675	-0.0579	0.0101	0.0181	0.068	0.076	0.0579	0.0101	0.0181	0.068	0.076	TRUE	FALSE	FALSE	FALSE	FALSE	TRUE	FALSE	TRUE	TRUE	TRUE	TRUE	TRUE	TRUE
SE	ENSG00000182446	NPLOC4	chr17:79536042:79536137:-@chr17:79534960:79535101:-@chr17:79534443:79534559:-	0.04	0.02	0.17	0.12	0.17	0.25	0.07	0.25	0.0459734	0.0597675	0.184634	0.158322	0.434684	0.0306	0.1485	0.2155	0.1675	-0.1179	-0.1849	-0.1369	-0.067	-0.019	0.1179	0.1849	0.1369	0.067	0.019	TRUE	FALSE	FALSE	FALSE	FALSE	TRUE	FALSE	TRUE	TRUE	TRUE	TRUE	TRUE	TRUE
SE	ENSG00000167107	ACSF2	chr17:48540756:48540913:+@chr17:48541179:48541270:+@chr17:48541579:48541655:+	0.5	0.54	0.72	0.7	0.62	0.56	0.72	0.79	0.0155795	0.093769	0.0234262	0.0648083	0.194268	0.5206	0.7135	0.5955	0.7625	-0.1929	-0.0749	-0.2419	0.118	-0.049	0.1929	0.0749	0.2419	0.118	0.049	TRUE	FALSE	TRUE	FALSE	FALSE	TRUE	FALSE	FALSE	TRUE	FALSE	TRUE	TRUE	FALSE
SE	ENSG00000108395	TRIM37	chr17:57089689:57089807:-@chr17:57078959:57079075:-@chr17:57075561:57076820:-	0.89	0.9	0.75	0.71	0.62	0.72	0.58	0.65	0.031799	0.0705321	0.039001	0.222096	0.0726862	0.8956	0.7335	0.6755	0.6225	0.1621	0.2201	0.2731	0.058	0.111	0.1621	0.2201	0.2731	0.058	0.111	TRUE	FALSE	TRUE	FALSE	FALSE	TRUE	FALSE	FALSE	TRUE	FALSE	TRUE	TRUE	FALSE
SE	ENSG00000141510	TP53	chr17:7576853:7576926:-@chr17:7573927:7574033:-@chr17:7571720:7573008:-	0.78	0.78	0.57	0.62	0.72	0.61	0.58	0.75	0.0442524	0.146302	0.213008	0.19705	0.270822	0.7806	0.5985	0.6705	0.6725	0.1821	0.1101	0.1081	-0.072	-0.074	0.1821	0.1101	0.1081	0.072	0.074	TRUE	FALSE	FALSE	FALSE	FALSE	TRUE	FALSE	TRUE	TRUE	TRUE	TRUE	TRUE	TRUE
SE	ENSG00000136436	CALCOCO2	chr17:46908397:46908440:+@chr17:46919060:46919249:+@chr17:46925426:46925528:+	0.5	0.47	0.56	0.57	0.57	0.5	0.48	0.45	0.0438099	0.166018	0.299526	0.28228	0.0328019	0.4856	0.5685	0.5405	0.4725	-0.0829	-0.0549	0.0131	0.028	0.096	0.0829	0.0549	0.0131	0.028	0.096	TRUE	FALSE	FALSE	FALSE	TRUE	TRUE	TRUE	TRUE	TRUE	TRUE	TRUE	TRUE	TRUE
SE	ENSG00000185813	PCYT2	chr17:79865649:79865733:-@chr17:79865430:79865474:-@chr17:79864636:79864774:-	0.82	0.76	0.65	0.59	0.63	0.73	0.83	0.78	0.0293761	0.121601	0.31677	0.211094	0.0207202	0.7906	0.6235	0.6855	0.8125	0.1671	0.1051	-0.0219	-0.062	-0.189	0.1671	0.1051	0.0219	0.062	0.189	TRUE	FALSE	FALSE	FALSE	TRUE	TRUE	TRUE	TRUE	TRUE	TRUE	TRUE	TRUE	TRUE
SE	ENSG00000266173,ENSG00000125695	STRADA,RP11-51F16.8	chr17:61787851:61787974:-@chr17:61784607:61784778:-@chr17:61783995:61784099:-	0.81	0.79	0.69	0.64	0.63	0.73	0.72	0.68	0.0396829	0.126167	0.0406333	0.399899	0.172213	0.8006	0.6685	0.6855	0.7075	0.1321	0.1151	0.0931	-0.017	-0.039	0.1321	0.1151	0.0931	0.017	0.039	TRUE	FALSE	TRUE	FALSE	FALSE	TRUE	FALSE	FALSE	TRUE	FALSE	TRUE	TRUE	FALSE
SE	ENSG00000141480	ARRB2	chr17:4621183:4621318:+@chr17:4621556:4621640:+@chr17:4621907:4621979:+	0.85	0.8	0.73	0.7	0.47	0.82	0.74	0.49	0.0469177	0.249349	0.170914	0.38236	0.290571	0.8256	0.7185	0.6505	0.6225	0.1071	0.1751	0.2031	0.068	0.096	0.1071	0.1751	0.2031	0.068	0.096	TRUE	FALSE	FALSE	FALSE	FALSE	TRUE	FALSE	TRUE	TRUE	TRUE	TRUE	TRUE	TRUE
SE	ENSG00000141698	NT5C3L	chr17:39987053:39987142:-@chr17:39985042:39985204:-@chr17:39983678:39983878:-	0.94	0.9	0.83	0.8	0.83	0.9	0.95	0.96	0.0326881	0.185716	0.136014	0.180487	0.0196647	0.9206	0.8185	0.8705	0.9625	0.1021	0.0501	-0.0419	-0.052	-0.144	0.1021	0.0501	0.0419	0.052	0.144	TRUE	FALSE	FALSE	FALSE	TRUE	TRUE	TRUE	TRUE	TRUE	TRUE	TRUE	TRUE	TRUE
SE	ENSG00000181523	SGSH	chr17:78188832:78188937:-@chr17:78188414:78188582:-@chr17:78187971:78188127:-	0.8	0.82	0.73	0.71	0.78	0.69	0.78	0.62	0.0116084	0.175652	0.207923	0.384123	0.436867	0.8106	0.7235	0.7405	0.7075	0.0871	0.0701	0.1031	-0.017	0.016	0.0871	0.0701	0.1031	0.017	0.016	TRUE	FALSE	FALSE	FALSE	FALSE	TRUE	FALSE	TRUE	TRUE	TRUE	TRUE	TRUE	TRUE
SE	ENSG00000141068	KSR1	chr17:25924294:25924462:+@chr17:25928386:25928427:+@chr17:25930860:25930914:+	0.63	0.61	0.49	0.43	0.56	0.47	0.66	0.54	0.0446693	0.126371	0.431221	0.205796	0.103544	0.6206	0.4635	0.5205	0.6075	0.1571	0.1001	0.0131	-0.057	-0.144	0.1571	0.1001	0.0131	0.057	0.144	TRUE	FALSE	FALSE	FALSE	FALSE	TRUE	FALSE	TRUE	TRUE	TRUE	TRUE	TRUE	TRUE
SE	NA	NA	chr17:57208642:57208728:-@chr17:57196680:57196856:-@chr17:57187308:57189706:-	0.38	0.36	0.48	0.45	0.64	0.55	0.52	0.5	0.0195341	0.05353	0.0046617	0.0903312	0.0622345	0.3706	0.4685	0.6005	0.5175	-0.0979	-0.2299	-0.1469	-0.132	-0.049	0.0979	0.2299	0.1469	0.132	0.049	TRUE	FALSE	TRUE	FALSE	FALSE	TRUE	FALSE	FALSE	TRUE	FALSE	TRUE	TRUE	FALSE
SE	ENSG00000109046	WSB1	chr17:25621106:25621461:+@chr17:25628814:25628982:+@chr17:25631806:25631937:+	0.71	0.68	0.8	0.85	0.74	0.79	0.73	0.81	0.0330518	0.0773879	0.132453	0.124515	0.207727	0.6956	0.8285	0.7705	0.7775	-0.1329	-0.0749	-0.0819	0.058	0.051	0.1329	0.0749	0.0819	0.058	0.051	TRUE	FALSE	FALSE	FALSE	FALSE	TRUE	FALSE	TRUE	TRUE	TRUE	TRUE	TRUE	TRUE
SE	ENSG00000108469	RECQL5	chr17:73647266:73647345:-@chr17:73646597:73646798:-@chr17:73627530:73627748:-	0.04	0.02	0.09	0.1	0.06	0.08	0.06	0.06	0.0259115	0.0467085	0.0870868	0.115678	0.0546999	0.0306	0.0985	0.0755	0.0675	-0.0679	-0.0449	-0.0369	0.023	0.031	0.0679	0.0449	0.0369	0.023	0.031	TRUE	FALSE	FALSE	FALSE	FALSE	TRUE	FALSE	TRUE	TRUE	TRUE	TRUE	TRUE	TRUE
SE	ENSG00000141522	ARHGDIA	chr17:79827418:79827501:-@chr17:79827206:79827282:-@chr17:79827049:79827112:-	0.35	0.41	0.52	0.55	0.52	0.5	0.48	0.43	0.0350425	0.055862	0.0855796	0.17741	0.0710191	0.3806	0.5385	0.5155	0.4625	-0.1579	-0.1349	-0.0819	0.023	0.076	0.1579	0.1349	0.0819	0.023	0.076	TRUE	FALSE	FALSE	FALSE	FALSE	TRUE	FALSE	TRUE	TRUE	TRUE	TRUE	TRUE	TRUE
SE	ENSG00000142494	SLC47A1	chr17:19445706:19445807:+@chr17:19449748:19449816:+@chr17:19451298:19451446:+	0.78	0.75	0.62	0.64	0.64	0.73	0.77	0.69	0.0133592	0.16382	0.302739	0.21086	0.106441	0.7656	0.6335	0.6905	0.7375	0.1321	0.0751	0.0281	-0.057	-0.104	0.1321	0.0751	0.0281	0.057	0.104	TRUE	FALSE	FALSE	FALSE	FALSE	TRUE	FALSE	TRUE	TRUE	TRUE	TRUE	TRUE	TRUE
SE	ENSG00000183010	PYCR1	chr17:79892529:79892621:-@chr17:79892202:79892365:-@chr17:79890269:79891252:-	0.59	0.59	0.49	0.51	0.64	0.57	0.5	0.53	0.0380021	0.333461	0.0711333	0.0873852	0.214624	0.5906	0.5035	0.6105	0.5225	0.0871	-0.0199	0.0681	-0.107	-0.019	0.0871	0.0199	0.0681	0.107	0.019	TRUE	FALSE	FALSE	FALSE	FALSE	TRUE	FALSE	TRUE	TRUE	TRUE	TRUE	TRUE	TRUE
SE	ENSG00000214941	ZSWIM7	chr17:15902833:15903006:-@chr17:15897071:15897092:-@chr17:15890580:15890682:-	0.93	0.96	0.86	0.84	0.83	0.87	0.86	0.93	0.0232246	0.040523	0.212227	0.470177	0.194268	0.9456	0.8535	0.8555	0.9025	0.0921	0.0901	0.0431	-0.002	-0.049	0.0921	0.0901	0.0431	0.002	0.049	TRUE	TRUE	FALSE	FALSE	FALSE	TRUE	FALSE	FALSE	TRUE	FALSE	TRUE	FALSE	TRUE
SE	ENSG00000171634	BPTF	chr17:65924471:65924717:+@chr17:65925075:65925236:+@chr17:65925452:65925603:+	0.02	0.04	0.07	0.09	0.1	0.11	0.1	0.06	0.033062	0.0166325	0.0822138	0.0950267	0.438804	0.0306	0.0835	0.1105	0.0875	-0.0529	-0.0799	-0.0569	-0.027	-0.004	0.0529	0.0799	0.0569	0.027	0.004	TRUE	TRUE	FALSE	FALSE	FALSE	TRUE	FALSE	FALSE	TRUE	FALSE	TRUE	FALSE	TRUE
SE	ENSG00000011143	MKS1	chr17:56293449:56293604:-@chr17:56292102:56292259:-@chr17:56291620:56291748:-	0.79	0.73	0.6	0.58	0.61	0.45	0.62	0.62	0.0454501	0.0915061	0.0714342	0.299073	0.0862987	0.7606	0.5935	0.5355	0.6275	0.1671	0.2251	0.1331	0.058	-0.034	0.1671	0.2251	0.1331	0.058	0.034	TRUE	FALSE	FALSE	FALSE	FALSE	TRUE	FALSE	TRUE	TRUE	TRUE	TRUE	TRUE	TRUE
SE	ENSG00000138443	ABI2	chr2:204255769:204255866:+@chr2:204259423:204259569:+@chr2:204260379:204260503:+	0.91	0.93	0.84	0.85	0.81	0.84	0.83	0.88	0.0195128	0.0273994	0.116918	0.22064	0.340097	0.9206	0.8485	0.8305	0.8625	0.0721	0.0901	0.0581	0.018	-0.014	0.0721	0.0901	0.0581	0.018	0.014	TRUE	TRUE	FALSE	FALSE	FALSE	TRUE	FALSE	FALSE	TRUE	FALSE	TRUE	FALSE	TRUE
SE	ENSG00000142330	CAPN10	chr2:241534441:241534721:+@chr2:241535736:241535938:+@chr2:241537305:241537504:+	0.75	0.78	0.65	0.63	0.74	0.56	0.67	0.74	0.0145373	0.215378	0.176977	0.457626	0.143471	0.7656	0.6435	0.6555	0.7125	0.1221	0.1101	0.0531	-0.012	-0.069	0.1221	0.1101	0.0531	0.012	0.069	TRUE	FALSE	FALSE	FALSE	FALSE	TRUE	FALSE	TRUE	TRUE	TRUE	TRUE	TRUE	TRUE
SE	ENSG00000115275	MOGS	chr2:74692441:74692537:-@chr2:74691623:74691849:-@chr2:74690317:74690513:-	0.96	0.94	0.88	0.87	0.85	0.85	0.93	0.93	0.028129	0.0343883	0.213405	0.0596923	0.0229939	0.9506	0.8785	0.8555	0.9375	0.0721	0.0951	0.0131	0.023	-0.059	0.0721	0.0951	0.0131	0.023	0.059	TRUE	TRUE	FALSE	FALSE	TRUE	TRUE	TRUE	FALSE	TRUE	FALSE	TRUE	FALSE	TRUE
SE	ENSG00000115760	BIRC6	chr2:32658712:32658872:+@chr2:32660564:32660653:+@chr2:32661121:32661252:+	0.51	0.54	0.76	0.7	0.42	0.31	0.73	0.48	0.0245694	0.0981249	0.305783	0.0246625	0.252335	0.5256	0.7335	0.3705	0.6125	-0.2079	0.1551	-0.0869	0.363	0.121	0.2079	0.1551	0.0869	0.363	0.121	TRUE	FALSE	FALSE	TRUE	FALSE	TRUE	TRUE	TRUE	TRUE	TRUE	TRUE	TRUE	TRUE
SE	ENSG00000168385	42249	chr2:242263631:242263656:+@chr2:242265382:242265528:+@chr2:242274541:242274627:+	0.52	0.57	0.33	0.4	0.56	0.37	0.54	0.47	0.033138	0.284912	0.261947	0.232899	0.0503725	0.5456	0.3685	0.4705	0.5125	0.1771	0.0751	0.0331	-0.102	-0.144	0.1771	0.0751	0.0331	0.102	0.144	TRUE	FALSE	FALSE	FALSE	FALSE	TRUE	FALSE	TRUE	TRUE	TRUE	TRUE	TRUE	TRUE
SE	NA	NA	chr2:32390910:32390972:+@chr2:32396356:32396442:+@chr2:32399132:32399216:+	0.56	0.54	0.47	0.49	0.67	0.49	0.5	0.52	0.0226253	0.381703	0.0772324	0.22836	0.074601	0.5506	0.4835	0.5855	0.5175	0.0671	-0.0349	0.0331	-0.102	-0.034	0.0671	0.0349	0.0331	0.102	0.034	TRUE	FALSE	FALSE	FALSE	FALSE	TRUE	FALSE	TRUE	TRUE	TRUE	TRUE	TRUE	TRUE
SE	ENSG00000143995	MEIS1	chr2:66664869:66665095:+@chr2:66666975:66667116:+@chr2:66667694:66667744:+	0.63	0.58	0.76	0.72	0.56	0.8	0.67	0.62	0.0279568	0.313147	0.15767	0.357223	0.0533478	0.6056	0.7435	0.6855	0.6525	-0.1379	-0.0799	-0.0469	0.058	0.091	0.1379	0.0799	0.0469	0.058	0.091	TRUE	FALSE	FALSE	FALSE	FALSE	TRUE	FALSE	TRUE	TRUE	TRUE	TRUE	TRUE	TRUE
SE	NA	NA	chr2:30369750:30369928:+@chr2:30379494:30379658:+@chr2:30381485:30383399:+	0.97	0.94	0.88	0.9	0.81	0.95	0.84	0.9	0.0470057	0.248852	0.0962701	0.464124	0.346863	0.9556	0.8935	0.8855	0.8775	0.0621	0.0701	0.0781	0.008	0.016	0.0621	0.0701	0.0781	0.008	0.016	TRUE	FALSE	FALSE	FALSE	FALSE	TRUE	FALSE	TRUE	TRUE	TRUE	TRUE	TRUE	TRUE
SE	ENSG00000169607	CKAP2L	chr2:113522139:113522254:-@chr2:113520080:113520146:-@chr2:113518290:113518341:-	0.47	0.48	0.56	0.54	0.6	0.59	0.52	0.45	0.0202192	0.00132494	0.355	0.041568	0.15633	0.4756	0.5535	0.6005	0.4925	-0.0779	-0.1249	-0.0169	-0.047	0.061	0.0779	0.1249	0.0169	0.047	0.061	TRUE	TRUE	FALSE	FALSE	FALSE	TRUE	FALSE	FALSE	TRUE	FALSE	TRUE	FALSE	TRUE
SE	ENSG00000003393	ALS2	chr2:202645600:202645895:-@chr2:202644702:202644806:-@chr2:202633589:202633668:-	0.19	0.15	0.36	0.38	0.24	0.17	0.14	0.39	0.0143143	0.22223	0.282187	0.0546391	0.284088	0.1706	0.3735	0.2105	0.2725	-0.2029	-0.0399	-0.1019	0.163	0.101	0.2029	0.0399	0.1019	0.163	0.101	TRUE	FALSE	FALSE	FALSE	FALSE	TRUE	FALSE	TRUE	TRUE	TRUE	TRUE	TRUE	TRUE
SE	ENSG00000144136	SLC20A1	chr2:113410279:113410375:+@chr2:113410466:113410524:+@chr2:113414699:113414818:+	0.49	0.42	0.15	0.19	0.22	0.56	0.28	0.3	0.0176067	0.392414	0.0587409	0.207311	0.0297184	0.4556	0.1735	0.3955	0.2975	0.2821	0.0601	0.1581	-0.222	-0.124	0.2821	0.0601	0.1581	0.222	0.124	TRUE	FALSE	FALSE	FALSE	TRUE	TRUE	TRUE	TRUE	TRUE	TRUE	TRUE	TRUE	TRUE
SE	ENSG00000115020	PIKFYVE	chr2:209138308:209138457:+@chr2:209141436:209141554:+@chr2:209150450:209150657:+	0.51	0.46	0.24	0.2	0.22	0.51	0.33	0.13	0.00879929	0.286208	0.113093	0.247463	0.455703	0.4856	0.2235	0.3705	0.2375	0.2621	0.1151	0.2481	-0.147	-0.014	0.2621	0.1151	0.2481	0.147	0.014	TRUE	FALSE	FALSE	FALSE	FALSE	TRUE	FALSE	TRUE	TRUE	TRUE	TRUE	TRUE	TRUE
SE	ENSG00000064933	PMS1	chr2:190682743:190682906:+@chr2:190708690:190708806:+@chr2:190717381:190717503:+	0.86	0.87	0.75	0.78	0.76	0.8	0.8	0.65	0.0399485	0.0726524	0.161976	0.290342	0.356799	0.8656	0.7685	0.7855	0.7325	0.0971	0.0801	0.1331	-0.017	0.036	0.0971	0.0801	0.1331	0.017	0.036	TRUE	FALSE	FALSE	FALSE	FALSE	TRUE	FALSE	TRUE	TRUE	TRUE	TRUE	TRUE	TRUE
SE	ENSG00000071054	MAP4K4	chr2:102483674:102483771:+@chr2:102484491:102484499:+@chr2:102486084:102486259:+	0.04	0.07	0.37	0.35	0.04	0.36	0.02	0.3	0.00302163	0.260502	0.285608	0.252322	0.197553	0.0556	0.3635	0.2055	0.1675	-0.3079	-0.1499	-0.1119	0.158	0.196	0.3079	0.1499	0.1119	0.158	0.196	TRUE	FALSE	FALSE	FALSE	FALSE	TRUE	FALSE	TRUE	TRUE	TRUE	TRUE	TRUE	TRUE
SE	ENSG00000003393	ALS2	chr2:202645600:202645895:-@chr2:202643164:202643210:-@chr2:202633589:202633668:-	0.24	0.29	0.54	0.44	0.22	0.21	0.14	0.44	0.0445824	0.155164	0.433687	0.0558957	0.201933	0.2656	0.4935	0.2205	0.2975	-0.2279	0.0451	-0.0319	0.273	0.196	0.2279	0.0451	0.0319	0.273	0.196	TRUE	FALSE	FALSE	FALSE	FALSE	TRUE	FALSE	TRUE	TRUE	TRUE	TRUE	TRUE	TRUE
SE	ENSG00000068781	STON1-GTF2A1L	chr2:48757308:48757355:+@chr2:48757852:48757968:+@chr2:48807726:48809702:+	0.1	0.15	0.5	0.39	0.23	0.33	0.34	0.26	0.0336297	0.0742861	0.0394023	0.0801191	0.0916964	0.1256	0.4485	0.2855	0.3075	-0.3229	-0.1599	-0.1819	0.163	0.141	0.3229	0.1599	0.1819	0.163	0.141	TRUE	FALSE	TRUE	FALSE	FALSE	TRUE	FALSE	FALSE	TRUE	FALSE	TRUE	TRUE	FALSE
SE	ENSG00000115657,ENSG00000198925	ABCB6,ATG9A	chr2:220081086:220081187:-@chr2:220080719:220080902:-@chr2:220079683:220079804:-	0.84	0.87	0.76	0.77	0.81	0.86	0.83	0.81	0.037515	0.334803	0.133808	0.101931	0.0259445	0.8556	0.7685	0.8405	0.8275	0.0871	0.0151	0.0281	-0.072	-0.059	0.0871	0.0151	0.0281	0.072	0.059	TRUE	FALSE	FALSE	FALSE	TRUE	TRUE	TRUE	TRUE	TRUE	TRUE	TRUE	TRUE	TRUE
SE	NA	NA	chr2:71357310:71357394:-@chr2:71356847:71356947:-@chr2:71351336:71351673:-	0.1	0.08	0.17	0.17	0.15	0.11	0.17	0.18	0.0394244	0.10865	0.0165423	0.150833	0.173715	0.0906	0.1735	0.1355	0.1825	-0.0829	-0.0449	-0.0919	0.038	-0.009	0.0829	0.0449	0.0919	0.038	0.009	TRUE	FALSE	TRUE	FALSE	FALSE	TRUE	FALSE	FALSE	TRUE	FALSE	TRUE	TRUE	FALSE
SE	ENSG00000028116	VRK2	chr2:58275962:58276102:+@chr2:58285487:58285623:+@chr2:58311224:58311273:+	0.01	0.03	0.09	0.06	0.26	0.14	0.04	0.02	0.0480954	0.0952906	0.168679	0.132381	0.0807313	0.0206	0.0785	0.2055	0.0375	-0.0579	-0.1849	-0.0169	-0.127	0.041	0.0579	0.1849	0.0169	0.127	0.041	TRUE	FALSE	FALSE	FALSE	FALSE	TRUE	FALSE	TRUE	TRUE	TRUE	TRUE	TRUE	TRUE
SE	ENSG00000115685	PPP1R7	chr2:242089902:242089962:+@chr2:242092891:242093019:+@chr2:242097222:242097277:+	0.39	0.39	0.51	0.5	0.6	0.43	0.57	0.29	0.0116149	0.183576	0.396763	0.455109	0.350139	0.3906	0.5085	0.5205	0.4375	-0.1179	-0.1299	-0.0469	-0.012	0.071	0.1179	0.1299	0.0469	0.012	0.071	TRUE	FALSE	FALSE	FALSE	FALSE	TRUE	FALSE	TRUE	TRUE	TRUE	TRUE	TRUE	TRUE
SE	ENSG00000135926	TMBIM1	chr2:219157189:219157280:-@chr2:219150486:219150661:-@chr2:219146663:219146904:-	0.6	0.48	0.29	0.17	0.33	0.1	0.5	0.46	0.0342533	0.0852589	0.268094	0.465757	0.0597861	0.5406	0.2335	0.2205	0.4875	0.3071	0.3201	0.0531	0.013	-0.254	0.3071	0.3201	0.0531	0.013	0.254	TRUE	FALSE	FALSE	FALSE	FALSE	TRUE	FALSE	TRUE	TRUE	TRUE	TRUE	TRUE	TRUE
SE	ENSG00000135931	ARMC9	chr2:232127019:232127111:+@chr2:232135695:232135785:+@chr2:232137668:232137791:+	0.63	0.65	0.72	0.73	0.5	0.69	0.52	0.7	0.01433	0.373485	0.42052	0.203749	0.217447	0.6406	0.7285	0.6005	0.6175	-0.0879	0.0401	0.0231	0.128	0.111	0.0879	0.0401	0.0231	0.128	0.111	TRUE	FALSE	FALSE	FALSE	FALSE	TRUE	FALSE	TRUE	TRUE	TRUE	TRUE	TRUE	TRUE
SE	ENSG00000123600	METTL8	chr2:172195694:172196064:-@chr2:172188314:172188377:-@chr2:172187069:172187208:-	0.16	0.18	0.09	0.08	0.24	0.16	0.19	0.29	0.0196811	0.267896	0.181593	0.101707	0.0966852	0.1706	0.0885	0.2055	0.2475	0.0821	-0.0349	-0.0769	-0.117	-0.159	0.0821	0.0349	0.0769	0.117	0.159	TRUE	FALSE	FALSE	FALSE	FALSE	TRUE	FALSE	TRUE	TRUE	TRUE	TRUE	TRUE	TRUE
SE	ENSG00000003509	C2orf56	chr2:37468721:37468934:+@chr2:37469778:37469836:+@chr2:37471006:37471116:+	0.8	0.83	0.62	0.63	0.81	0.67	0.59	0.78	0.0143162	0.246638	0.208221	0.169918	0.31201	0.8156	0.6285	0.7455	0.6925	0.1871	0.0701	0.1231	-0.117	-0.064	0.1871	0.0701	0.1231	0.117	0.064	TRUE	FALSE	FALSE	FALSE	FALSE	TRUE	FALSE	TRUE	TRUE	TRUE	TRUE	TRUE	TRUE
SE	ENSG00000144504	ANKMY1	chr2:241439375:241439540:-@chr2:241421600:241421678:-@chr2:241420354:241420514:-	0.4	0.38	0.27	0.21	0.2	0.49	0.31	0.59	0.048342	0.414429	0.358541	0.297431	0.180902	0.3906	0.2435	0.3505	0.4575	0.1471	0.0401	-0.0669	-0.107	-0.214	0.1471	0.0401	0.0669	0.107	0.214	TRUE	FALSE	FALSE	FALSE	FALSE	TRUE	FALSE	TRUE	TRUE	TRUE	TRUE	TRUE	TRUE
SE	ENSG00000123600	METTL8	chr2:172248553:172248707:-@chr2:172216932:172217023:-@chr2:172195694:172196064:-	0.93	0.94	0.84	0.83	0.75	0.79	0.92	0.86	0.00218602	0.0346025	0.207847	0.0933968	0.144708	0.9356	0.8385	0.7755	0.8975	0.0971	0.1601	0.0381	0.063	-0.059	0.0971	0.1601	0.0381	0.063	0.059	TRUE	TRUE	FALSE	FALSE	FALSE	TRUE	FALSE	FALSE	TRUE	FALSE	TRUE	FALSE	TRUE
SE	ENSG00000064933	PMS1	chr2:190660495:190660677:+@chr2:190670378:190670480:+@chr2:190682743:190682906:+	0.93	0.96	0.86	0.89	0.87	0.88	0.91	0.92	0.0440319	0.053687	0.168969	0.459904	0.0929522	0.9456	0.8785	0.8805	0.9225	0.0671	0.0651	0.0231	-0.002	-0.044	0.0671	0.0651	0.0231	0.002	0.044	TRUE	FALSE	FALSE	FALSE	FALSE	TRUE	FALSE	TRUE	TRUE	TRUE	TRUE	TRUE	TRUE
SE	NA	NA	chr2:111881310:111881446:+@chr2:111881627:111881716:+@chr2:111921710:111926022:+	0.11	0.06	0.18	0.22	0.1	0.09	0.21	0.18	0.0367041	0.330943	0.0412311	0.0559436	0.4861	0.0856	0.2035	0.1005	0.2025	-0.1179	-0.0149	-0.1169	0.103	0.001	0.1179	0.0149	0.1169	0.103	0.001	TRUE	FALSE	TRUE	FALSE	FALSE	TRUE	FALSE	FALSE	TRUE	FALSE	TRUE	TRUE	FALSE
SE	ENSG00000115282	TTC31	chr2:74710449:74710537:+@chr2:74717152:74717254:+@chr2:74717371:74717600:+	0.6	0.62	0.68	0.69	0.56	0.81	0.68	0.7	0.0173023	0.319462	0.0131335	0.494929	0.274115	0.6106	0.6885	0.6905	0.6975	-0.0779	-0.0799	-0.0869	-0.002	-0.009	0.0779	0.0799	0.0869	0.002	0.009	TRUE	FALSE	TRUE	FALSE	FALSE	TRUE	FALSE	FALSE	TRUE	FALSE	TRUE	TRUE	FALSE
SE	ENSG00000198925	ATG9A	chr2:220086994:220087172:-@chr2:220086772:220086889:-@chr2:220085802:220086024:-	0.98	0.96	0.9	0.91	0.86	0.83	0.92	0.86	0.0295376	0.0136596	0.108088	0.0610607	0.386591	0.9706	0.9085	0.8505	0.8975	0.0621	0.1201	0.0731	0.058	0.011	0.0621	0.1201	0.0731	0.058	0.011	TRUE	TRUE	FALSE	FALSE	FALSE	TRUE	FALSE	FALSE	TRUE	FALSE	TRUE	FALSE	TRUE
SE	ENSG00000144283	PKP4	chr2:159389692:159389828:+@chr2:159389950:159390046:+@chr2:159433783:159433895:+	0.08	0.06	0.11	0.13	0.3	0.1	0.24	0.06	0.0349832	0.201349	0.254057	0.280247	0.384497	0.0706	0.1235	0.2055	0.1575	-0.0529	-0.1349	-0.0869	-0.082	-0.034	0.0529	0.1349	0.0869	0.082	0.034	TRUE	FALSE	FALSE	FALSE	FALSE	TRUE	FALSE	TRUE	TRUE	TRUE	TRUE	TRUE	TRUE
SE	ENSG00000204792	AC104135.3	chr2:75155366:75158663:+@chr2:75159326:75159416:+@chr2:75159788:75160151:+	0.21	0.24	0.33	0.34	0.34	0.19	0.28	0.36	0.0271202	0.327103	0.105845	0.26428	0.415701	0.2256	0.3385	0.2705	0.3275	-0.1129	-0.0449	-0.1019	0.068	0.011	0.1129	0.0449	0.1019	0.068	0.011	TRUE	FALSE	FALSE	FALSE	FALSE	TRUE	FALSE	TRUE	TRUE	TRUE	TRUE	TRUE	TRUE
SE	ENSG00000072195	SPEG	chr2:220309547:220309883:+@chr2:220312696:220313993:+@chr2:220315858:220316001:+	0.95	0.88	0.67	0.73	0.82	0.87	0.86	0.75	0.0235612	0.142952	0.136565	0.0345763	0.127969	0.9156	0.7035	0.8505	0.8125	0.2121	0.0651	0.1031	-0.147	-0.109	0.2121	0.0651	0.1031	0.147	0.109	TRUE	FALSE	FALSE	TRUE	FALSE	TRUE	TRUE	TRUE	TRUE	TRUE	TRUE	TRUE	TRUE
SE	ENSG00000163029	SMC6	chr2:17934893:17935096:-@chr2:17934245:17934331:-@chr2:17927094:17927218:-	0.12	0.11	0.18	0.17	0.29	0.1	0.16	0.15	0.00676598	0.266883	0.0117863	0.427206	0.0642122	0.1156	0.1785	0.2005	0.1625	-0.0629	-0.0849	-0.0469	-0.022	0.016	0.0629	0.0849	0.0469	0.022	0.016	TRUE	FALSE	FALSE	FALSE	FALSE	TRUE	FALSE	TRUE	TRUE	TRUE	TRUE	TRUE	TRUE
SE	NA	NA	chr2:74758983:74759052:+@chr2:74759746:74759841:+@chr2:74759947:74760683:+	0.94	0.94	0.82	0.84	0.97	0.92	0.9	0.91	0.0309376	0.377763	0.0607386	0.0461856	0.0212073	0.9406	0.8335	0.9505	0.9125	0.1071	-0.0099	0.0281	-0.117	-0.079	0.1071	0.0099	0.0281	0.117	0.079	TRUE	FALSE	FALSE	TRUE	TRUE	TRUE	TRUE	TRUE	TRUE	TRUE	TRUE	TRUE	TRUE
SE	ENSG00000179528	LBX2	chr2:74729963:74730343:-@chr2:74728624:74728741:-@chr2:74724644:74725445:-	0.16	0.19	0.31	0.32	0.53	0.34	0.35	0.43	0.0201475	0.105637	0.0426779	0.209506	0.148527	0.1756	0.3185	0.4405	0.3975	-0.1429	-0.2649	-0.2219	-0.122	-0.079	0.1429	0.2649	0.2219	0.122	0.079	TRUE	FALSE	TRUE	FALSE	FALSE	TRUE	FALSE	FALSE	TRUE	FALSE	TRUE	TRUE	FALSE
SE	ENSG00000005436	GCFC2	chr2:75921367:75921553:-@chr2:75919103:75919226:-@chr2:75917764:75917845:-	0.77	0.79	0.84	0.87	0.61	0.41	0.78	0.7	0.0344757	0.112932	0.276497	0.0862712	0.0916909	0.7806	0.8585	0.5155	0.7475	-0.0779	0.2651	0.0331	0.343	0.111	0.0779	0.2651	0.0331	0.343	0.111	TRUE	FALSE	FALSE	FALSE	FALSE	TRUE	FALSE	TRUE	TRUE	TRUE	TRUE	TRUE	TRUE
SE	ENSG00000143933	CALM2	chr2:47403580:47403740:-@chr2:47399553:47399598:-@chr2:47397873:47397903:-	0.07	0.06	0.16	0.18	0.21	0.08	0.16	0.22	0.0136544	0.206219	0.067785	0.39112	0.286308	0.0656	0.1735	0.1505	0.1975	-0.1079	-0.0849	-0.1319	0.023	-0.024	0.1079	0.0849	0.1319	0.023	0.024	TRUE	FALSE	FALSE	FALSE	FALSE	TRUE	FALSE	TRUE	TRUE	TRUE	TRUE	TRUE	TRUE
SE	ENSG00000222041	LINC00152	chr2:87882777:87882865:+@chr2:87899588:87899741:+@chr2:87906112:87906324:+	0.11	0.13	0.18	0.16	0.07	0.12	0.14	0.06	0.0297212	0.286127	0.398524	0.0909704	0.16601	0.1206	0.1735	0.1005	0.1075	-0.0529	0.0201	0.0131	0.073	0.066	0.0529	0.0201	0.0131	0.073	0.066	TRUE	FALSE	FALSE	FALSE	FALSE	TRUE	FALSE	TRUE	TRUE	TRUE	TRUE	TRUE	TRUE
SE	ENSG00000115750	TAF1B	chr2:10008405:10008558:+@chr2:10015994:10016147:+@chr2:10022835:10022934:+	0.78	0.82	0.66	0.64	0.51	0.77	0.69	0.78	0.0228982	0.221122	0.203287	0.480523	0.145362	0.8006	0.6535	0.6455	0.7425	0.1471	0.1551	0.0581	0.008	-0.089	0.1471	0.1551	0.0581	0.008	0.089	TRUE	FALSE	FALSE	FALSE	FALSE	TRUE	FALSE	TRUE	TRUE	TRUE	TRUE	TRUE	TRUE
SE	ENSG00000115525	ST3GAL5	chr2:86073500:86073686:-@chr2:86071519:86071677:-@chr2:86066271:86067515:-	0.77	0.81	0.52	0.56	0.74	0.79	0.78	0.74	0.00649975	0.299728	0.245674	0.0113292	0.00784712	0.7906	0.5435	0.7705	0.7675	0.2471	0.0201	0.0231	-0.227	-0.224	0.2471	0.0201	0.0231	0.227	0.224	TRUE	FALSE	FALSE	TRUE	TRUE	TRUE	TRUE	TRUE	TRUE	TRUE	TRUE	TRUE	TRUE
SE	ENSG00000237298	AC009948.3	chr2:179388179:179388363:+@chr2:179396041:179396305:+@chr2:179400459:179400555:+	0.39	0.4	0.61	0.59	0.58	0.37	0.52	0.41	0.00495408	0.282762	0.195601	0.223596	0.121395	0.3956	0.6035	0.4805	0.4725	-0.2079	-0.0849	-0.0769	0.123	0.131	0.2079	0.0849	0.0769	0.123	0.131	TRUE	FALSE	FALSE	FALSE	FALSE	TRUE	FALSE	TRUE	TRUE	TRUE	TRUE	TRUE	TRUE
SE	ENSG00000088179	PTPN4	chr2:120677645:120677817:+@chr2:120684174:120684242:+@chr2:120690000:120690125:+	0.5	0.39	0.74	0.68	0.62	0.62	0.8	0.38	0.039931	0.0950772	0.299393	0.102915	0.338945	0.4456	0.7135	0.6255	0.5975	-0.2679	-0.1799	-0.1519	0.088	0.116	0.2679	0.1799	0.1519	0.088	0.116	TRUE	FALSE	FALSE	FALSE	FALSE	TRUE	FALSE	TRUE	TRUE	TRUE	TRUE	TRUE	TRUE
SE	ENSG00000136699	SMPD4	chr2:130921947:130922018:-@chr2:130914824:130914969:-@chr2:130914158:130914248:-	0.42	0.48	0.57	0.63	0.63	0.47	0.62	0.54	0.0347106	0.198709	0.0592576	0.32762	0.390306	0.4506	0.6035	0.5555	0.5875	-0.1529	-0.1049	-0.1369	0.048	0.016	0.1529	0.1049	0.1369	0.048	0.016	TRUE	FALSE	FALSE	FALSE	FALSE	TRUE	FALSE	TRUE	TRUE	TRUE	TRUE	TRUE	TRUE
SE	NA	NA	chr2:111881310:111881446:+@chr2:111907621:111907724:+@chr2:111921710:111926022:+	0.39	0.38	0.49	0.49	0.4	0.5	0.4	0.35	0.0152374	0.198139	0.460174	0.294661	0.069085	0.3856	0.4935	0.4555	0.3825	-0.1079	-0.0699	0.0031	0.038	0.111	0.1079	0.0699	0.0031	0.038	0.111	TRUE	FALSE	FALSE	FALSE	FALSE	TRUE	FALSE	TRUE	TRUE	TRUE	TRUE	TRUE	TRUE
SE	ENSG00000144182,ENSG00000185414,ENSG00000241962	LIPT1,MRPL30,C2orf15	chr2:99772764:99772889:+@chr2:99774760:99774875:+@chr2:99778420:99779613:+	0.06	0.07	0.19	0.16	0.2	0.11	0.17	0.09	0.0300066	0.138157	0.158312	0.378584	0.239694	0.0656	0.1785	0.1605	0.1375	-0.1129	-0.0949	-0.0719	0.018	0.041	0.1129	0.0949	0.0719	0.018	0.041	TRUE	FALSE	FALSE	FALSE	FALSE	TRUE	FALSE	TRUE	TRUE	TRUE	TRUE	TRUE	TRUE
SE	ENSG00000204120	GIGYF2	chr2:233562015:233562102:+@chr2:233568134:233568199:+@chr2:233599865:233599948:+	0.61	0.55	0.69	0.73	0.58	0.62	0.71	0.7	0.0414546	0.287767	0.0688664	0.0325507	0.484582	0.5806	0.7135	0.6055	0.7125	-0.1329	-0.0249	-0.1319	0.108	0.001	0.1329	0.0249	0.1319	0.108	0.001	TRUE	FALSE	FALSE	TRUE	FALSE	TRUE	TRUE	TRUE	TRUE	TRUE	TRUE	TRUE	TRUE
SE	ENSG00000079156	OSBPL6	chr2:179203718:179203821:+@chr2:179204399:179204491:+@chr2:179213951:179214116:+	0.62	0.62	0.76	0.77	0.58	0.54	0.77	0.58	0.0114809	0.108209	0.315412	0.0228326	0.264836	0.6206	0.7685	0.5655	0.6825	-0.1479	0.0551	-0.0619	0.203	0.086	0.1479	0.0551	0.0619	0.203	0.086	TRUE	FALSE	FALSE	TRUE	FALSE	TRUE	TRUE	TRUE	TRUE	TRUE	TRUE	TRUE	TRUE
SE	ENSG00000091409	ITGA6	chr2:173352854:173352956:+@chr2:173354213:173354386:+@chr2:173355752:173355850:+	0.78	0.79	0.89	0.9	0.86	0.9	0.91	0.91	0.0022794	0.0575219	0.0103613	0.319722	0.0884259	0.7856	0.8985	0.8855	0.9175	-0.1129	-0.0999	-0.1319	0.013	-0.019	0.1129	0.0999	0.1319	0.013	0.019	TRUE	FALSE	TRUE	FALSE	FALSE	TRUE	FALSE	FALSE	TRUE	FALSE	TRUE	TRUE	FALSE
SE	ENSG00000158019	BRE	chr2:28521205:28521358:+@chr2:28532949:28533020:+@chr2:28561317:28561767:+	0.06	0.06	0.14	0.12	0.03	0.1	0.1	0.09	0.0410138	0.413432	0.0331057	0.156147	0.0721573	0.0606	0.1335	0.0705	0.1025	-0.0729	-0.0099	-0.0419	0.063	0.031	0.0729	0.0099	0.0419	0.063	0.031	TRUE	FALSE	FALSE	FALSE	FALSE	TRUE	FALSE	TRUE	TRUE	TRUE	TRUE	TRUE	TRUE
SE	ENSG00000151779	NBAS	chr2:15326866:15327004:-@chr2:15319112:15319240:-@chr2:15307032:15307447:-	0.8	0.75	0.62	0.68	0.68	0.57	0.64	0.63	0.0475663	0.0935045	0.0556229	0.378115	0.389938	0.7756	0.6535	0.6305	0.6425	0.1221	0.1451	0.1331	0.023	0.011	0.1221	0.1451	0.1331	0.023	0.011	TRUE	FALSE	FALSE	FALSE	FALSE	TRUE	FALSE	TRUE	TRUE	TRUE	TRUE	TRUE	TRUE
SE	ENSG00000114933	INO80D	chr2:206950625:206950906:-@chr2:206928293:206928408:-@chr2:206927875:206927968:-	0.13	0.08	0.26	0.33	0.16	0.42	0.24	0.19	0.028398	0.188329	0.0402253	0.492759	0.117815	0.1056	0.2985	0.2955	0.2225	-0.1929	-0.1899	-0.1169	0.003	0.076	0.1929	0.1899	0.1169	0.003	0.076	TRUE	FALSE	TRUE	FALSE	FALSE	TRUE	FALSE	FALSE	TRUE	FALSE	TRUE	TRUE	FALSE
SE	ENSG00000114956	DGUOK	chr2:74173846:74174033:+@chr2:74177712:74177859:+@chr2:74185273:74185372:+	0.21	0.25	0.43	0.41	0.26	0.23	0.24	0.24	0.0155795	0.253193	0.273479	0.00791355	0.016931	0.2306	0.4235	0.2505	0.2475	-0.1929	-0.0199	-0.0169	0.173	0.176	0.1929	0.0199	0.0169	0.173	0.176	TRUE	FALSE	FALSE	TRUE	TRUE	TRUE	TRUE	TRUE	TRUE	TRUE	TRUE	TRUE	TRUE
SE	NA	NA	chr2:155295104:155295238:+@chr2:155303110:155303277:+@chr2:155306923:155310489:+	0.13	0.12	0.31	0.32	0.43	0.2	0.46	0.43	0.00079777	0.168821	0.00707502	0.494442	0.0215436	0.1256	0.3185	0.3205	0.4525	-0.1929	-0.1949	-0.3269	-0.002	-0.134	0.1929	0.1949	0.3269	0.002	0.134	TRUE	FALSE	TRUE	FALSE	TRUE	TRUE	TRUE	FALSE	TRUE	FALSE	TRUE	TRUE	FALSE
SE	ENSG00000115661	STK16	chr2:220111379:220111598:+@chr2:220111835:220111968:+@chr2:220112137:220112257:+	0.86	0.83	0.69	0.71	0.83	0.67	0.83	0.76	0.0117805	0.227913	0.206937	0.315389	0.0950275	0.8456	0.7035	0.7555	0.8025	0.1421	0.0901	0.0431	-0.052	-0.099	0.1421	0.0901	0.0431	0.052	0.099	TRUE	FALSE	FALSE	FALSE	FALSE	TRUE	FALSE	TRUE	TRUE	TRUE	TRUE	TRUE	TRUE
SE	ENSG00000115459	ELMOD3	chr2:85582678:85582839:+@chr2:85583725:85583790:+@chr2:85584090:85584375:+	0.19	0.07	0.45	0.37	0.19	0.29	0.21	0.32	0.0375442	0.142762	0.113337	0.0635202	0.0939114	0.1306	0.4135	0.2455	0.2725	-0.2829	-0.1149	-0.1419	0.168	0.141	0.2829	0.1149	0.1419	0.168	0.141	TRUE	FALSE	FALSE	FALSE	FALSE	TRUE	FALSE	TRUE	TRUE	TRUE	TRUE	TRUE	TRUE
SE	NA	NA	chr4:153456093:153456185:-@chr4:153333632:153333681:-@chr4:153332455:153333024:-	0.64	0.66	0.38	0.27	0.39	0.2	0.32	0.28	0.0491381	0.0823436	0.00660552	0.413288	0.384231	0.6506	0.3285	0.3005	0.3075	0.3221	0.3501	0.3431	0.028	0.021	0.3221	0.3501	0.3431	0.028	0.021	TRUE	FALSE	TRUE	FALSE	FALSE	TRUE	FALSE	FALSE	TRUE	FALSE	TRUE	TRUE	FALSE
SE	ENSG00000129187	DCTD	chr4:183838464:183838630:-@chr4:183837826:183838010:-@chr4:183836614:183836728:-	0.15	0.12	0.22	0.24	0.2	0.19	0.07	0.09	0.0222647	0.0629785	0.0696402	0.0782552	0.00509328	0.1356	0.2335	0.2005	0.0875	-0.0979	-0.0649	0.0481	0.033	0.146	0.0979	0.0649	0.0481	0.033	0.146	TRUE	FALSE	FALSE	FALSE	TRUE	TRUE	TRUE	TRUE	TRUE	TRUE	TRUE	TRUE	TRUE
SE	ENSG00000071205	ARHGAP10	chr4:148968043:148968202:+@chr4:148984299:148984451:+@chr4:148985567:148985658:+	0.6	0.7	0.37	0.32	0.55	0.35	0.51	0.39	0.0302689	0.132213	0.0671131	0.235485	0.145215	0.6506	0.3485	0.4555	0.4575	0.3021	0.1951	0.1931	-0.107	-0.109	0.3021	0.1951	0.1931	0.107	0.109	TRUE	FALSE	FALSE	FALSE	FALSE	TRUE	FALSE	TRUE	TRUE	TRUE	TRUE	TRUE	TRUE
SE	ENSG00000138777	PPA2	chr4:106395051:106395227:-@chr4:106377853:106377902:-@chr4:106374755:106374799:-	0.89	0.91	0.96	0.95	0.88	0.95	0.9	0.87	0.031933	0.337362	0.346599	0.238259	0.0566229	0.9006	0.9585	0.9205	0.8925	-0.0579	-0.0199	0.0081	0.038	0.066	0.0579	0.0199	0.0081	0.038	0.066	TRUE	FALSE	FALSE	FALSE	FALSE	TRUE	FALSE	TRUE	TRUE	TRUE	TRUE	TRUE	TRUE
SE	ENSG00000109323	MANBA	chr4:103645019:103645124:-@chr4:103644028:103644198:-@chr4:103635595:103635718:-	0.9	0.89	0.82	0.84	0.84	0.83	0.84	0.88	0.0305994	0.00869887	0.195504	0.313364	0.158043	0.8956	0.8335	0.8405	0.8675	0.0621	0.0551	0.0281	-0.007	-0.034	0.0621	0.0551	0.0281	0.007	0.034	TRUE	TRUE	FALSE	FALSE	FALSE	TRUE	FALSE	FALSE	TRUE	FALSE	TRUE	FALSE	TRUE
SE	ENSG00000168152	THAP9	chr4:83828938:83829088:+@chr4:83831850:83831964:+@chr4:83838097:83841284:+	0.12	0.12	0.04	0.06	0.18	0.04	0.17	0.18	0.0492045	0.476684	0.0276243	0.267297	0.0102264	0.1206	0.0535	0.1155	0.1825	0.0671	0.0051	-0.0619	-0.062	-0.129	0.0671	0.0051	0.0619	0.062	0.129	TRUE	FALSE	TRUE	FALSE	TRUE	TRUE	TRUE	FALSE	TRUE	FALSE	TRUE	TRUE	FALSE
SE	ENSG00000185619	PCGF3	chr4:724759:724899:+@chr4:726233:726287:+@chr4:727461:727578:+	0.05	0.05	0.13	0.12	0.17	0.26	0.08	0.04	0.0176829	0.0832783	0.272682	0.144943	0.0910904	0.0506	0.1285	0.2205	0.0675	-0.0779	-0.1699	-0.0169	-0.092	0.061	0.0779	0.1699	0.0169	0.092	0.061	TRUE	FALSE	FALSE	FALSE	FALSE	TRUE	FALSE	TRUE	TRUE	TRUE	TRUE	TRUE	TRUE
SE	ENSG00000035928	RFC1	chr4:39329144:39329376:-@chr4:39328183:39328260:-@chr4:39324960:39325037:-	0.93	0.93	0.86	0.86	0.85	0.84	0.89	0.86	6.58442e-05	0.0171907	0.0930805	0.104244	0.207396	0.9306	0.8635	0.8505	0.8825	0.0671	0.0801	0.0481	0.013	-0.019	0.0671	0.0801	0.0481	0.013	0.019	TRUE	TRUE	FALSE	FALSE	FALSE	TRUE	FALSE	FALSE	TRUE	FALSE	TRUE	FALSE	TRUE
SE	ENSG00000138777	PPA2	chr4:106395051:106395227:-@chr4:106374755:106374799:-@chr4:106370507:106370560:-	0.28	0.24	0.08	0.12	0.26	0.16	0.14	0.4	0.0161302	0.261991	0.459119	0.115826	0.202841	0.2606	0.1035	0.2155	0.2775	0.1571	0.0451	-0.0169	-0.112	-0.174	0.1571	0.0451	0.0169	0.112	0.174	TRUE	FALSE	FALSE	FALSE	FALSE	TRUE	FALSE	TRUE	TRUE	TRUE	TRUE	TRUE	TRUE
SE	ENSG00000151612	ZNF827	chr4:146686131:146686317:-@chr4:146684242:146684274:-@chr4:146681888:146682750:-	0.54	0.55	0.3	0.28	0.38	0.28	0.57	0.57	0.0037523	0.0723382	0.0439994	0.274936	0.010471	0.5456	0.2935	0.3355	0.5775	0.2521	0.2101	-0.0319	-0.042	-0.284	0.2521	0.2101	0.0319	0.042	0.284	TRUE	FALSE	FALSE	FALSE	TRUE	TRUE	TRUE	TRUE	TRUE	TRUE	TRUE	TRUE	TRUE
SE	ENSG00000138698	RAP1GDS1	chr4:99300168:99300314:+@chr4:99308587:99308658:+@chr4:99313103:99313231:+	0.04	0.03	0.13	0.1	0.05	0.03	0.18	0.03	0.0398069	0.240617	0.244664	0.0334123	0.474539	0.0356	0.1185	0.0455	0.1125	-0.0829	-0.0099	-0.0769	0.073	0.006	0.0829	0.0099	0.0769	0.073	0.006	TRUE	FALSE	FALSE	TRUE	FALSE	TRUE	TRUE	TRUE	TRUE	TRUE	TRUE	TRUE	TRUE
SE	ENSG00000109618	SEPSECS	chr4:25161878:25162204:-@chr4:25161132:25161386:-@chr4:25160575:25160729:-	0.17	0.18	0.06	0.09	0.18	0.08	0.07	0.09	0.0399485	0.283011	0.021554	0.222815	0.341901	0.1756	0.0785	0.1355	0.0875	0.0971	0.0401	0.0881	-0.057	-0.009	0.0971	0.0401	0.0881	0.057	0.009	TRUE	FALSE	TRUE	FALSE	FALSE	TRUE	FALSE	FALSE	TRUE	FALSE	TRUE	TRUE	FALSE
SE	ENSG00000157426	AASDH	chr4:57253528:57253638:-@chr4:57248643:57248763:-@chr4:57244314:57244630:-	0.31	0.4	0.54	0.62	0.39	0.69	0.49	0.37	0.0321149	0.207983	0.196574	0.42187	0.0982731	0.3556	0.5835	0.5455	0.4375	-0.2279	-0.1899	-0.0819	0.038	0.146	0.2279	0.1899	0.0819	0.038	0.146	TRUE	FALSE	FALSE	FALSE	FALSE	TRUE	FALSE	TRUE	TRUE	TRUE	TRUE	TRUE	TRUE
SE	ENSG00000129116	PALLD	chr4:169753156:169753322:+@chr4:169798874:169799545:+@chr4:169812073:169812208:+	0.8	0.78	0.85	0.88	0.63	0.91	0.8	0.77	0.0331515	0.465941	0.462897	0.313702	0.0351858	0.7906	0.8685	0.7755	0.7925	-0.0779	0.0151	-0.0019	0.093	0.076	0.0779	0.0151	0.0019	0.093	0.076	TRUE	FALSE	FALSE	FALSE	TRUE	TRUE	TRUE	TRUE	TRUE	TRUE	TRUE	TRUE	TRUE
SE	ENSG00000163697	APBB2	chr4:41145004:41145159:-@chr4:41140059:41140173:-@chr4:41102656:41102767:-	0.13	0.12	0.05	0.07	0.09	0.08	0.03	0.03	0.0305994	0.0201845	0.0187187	0.0994413	0.121845	0.1256	0.0635	0.0905	0.0375	0.0621	0.0351	0.0881	-0.027	0.026	0.0621	0.0351	0.0881	0.027	0.026	TRUE	FALSE	TRUE	FALSE	FALSE	TRUE	FALSE	FALSE	TRUE	FALSE	TRUE	TRUE	FALSE
SE	ENSG00000138698	RAP1GDS1	chr4:99264290:99264412:+@chr4:99273627:99273752:+@chr4:99300168:99300314:+	0.95	0.93	0.89	0.87	0.8	0.82	0.91	0.92	0.0282858	0.00683708	0.150011	0.0207641	0.0484802	0.9406	0.8835	0.8155	0.9225	0.0571	0.1251	0.0181	0.068	-0.039	0.0571	0.1251	0.0181	0.068	0.039	TRUE	TRUE	FALSE	TRUE	FALSE	TRUE	TRUE	FALSE	TRUE	FALSE	TRUE	FALSE	TRUE
SE	NA	NA	chr4:38869354:38869455:+@chr4:38879692:38880047:+@chr4:38893364:38893451:+	0.79	0.8	0.67	0.67	0.67	0.67	0.73	0.76	0.0112126	0.0114035	0.0987478	0.0527864	0.0615137	0.7956	0.6735	0.6755	0.7525	0.1221	0.1201	0.0431	-0.002	-0.079	0.1221	0.1201	0.0431	0.002	0.079	TRUE	TRUE	FALSE	FALSE	FALSE	TRUE	FALSE	FALSE	TRUE	FALSE	TRUE	FALSE	TRUE
SE	ENSG00000138778	CENPE	chr4:104095893:104096060:-@chr4:104084636:104084710:-@chr4:104084294:104084413:-	0.4	0.44	0.56	0.53	0.62	0.75	0.6	0.65	0.0204477	0.0641249	0.0130648	0.131537	0.0669453	0.4206	0.5485	0.6905	0.6325	-0.1279	-0.2699	-0.2119	-0.142	-0.084	0.1279	0.2699	0.2119	0.142	0.084	TRUE	FALSE	TRUE	FALSE	FALSE	TRUE	FALSE	FALSE	TRUE	FALSE	TRUE	TRUE	FALSE
SE	ENSG00000197894	ADH5	chr4:100006266:100006367:-@chr4:100003126:100003267:-@chr4:100002516:100002603:-	0.81	0.8	0.75	0.75	0.77	0.72	0.78	0.78	0.0318621	0.127069	0.0909805	0.461218	0.000216123	0.8056	0.7535	0.7505	0.7875	0.0521	0.0551	0.0181	0.003	-0.034	0.0521	0.0551	0.0181	0.003	0.034	TRUE	FALSE	FALSE	FALSE	FALSE	TRUE	FALSE	TRUE	TRUE	TRUE	TRUE	TRUE	TRUE
SE	ENSG00000168826	ZBTB49	chr4:4303716:4304818:+@chr4:4314768:4314841:+@chr4:4322367:4323513:+	0.39	0.44	0.71	0.64	0.35	0.4	0.17	0.32	0.015872	0.213193	0.126472	0.0124348	0.0356108	0.4156	0.6785	0.3805	0.2525	-0.2629	0.0351	0.1631	0.298	0.426	0.2629	0.0351	0.1631	0.298	0.426	TRUE	FALSE	FALSE	TRUE	TRUE	TRUE	TRUE	TRUE	TRUE	TRUE	TRUE	TRUE	TRUE
SE	ENSG00000109618	SEPSECS	chr4:25161878:25162204:-@chr4:25161250:25161386:-@chr4:25160575:25160729:-	0.12	0.11	0.06	0.05	0.13	0.04	0.04	0.08	0.00813077	0.33644	0.119703	0.301346	0.368527	0.1156	0.0585	0.0905	0.0675	0.0571	0.0251	0.0481	-0.032	-0.009	0.0571	0.0251	0.0481	0.032	0.009	TRUE	FALSE	FALSE	FALSE	FALSE	TRUE	FALSE	TRUE	TRUE	TRUE	TRUE	TRUE	TRUE
SE	NA	NA	chr4:79570755:79570863:+@chr4:79584072:79584165:+@chr4:79601915:79605655:+	0.43	0.43	0.53	0.51	0.59	0.19	0.31	0.15	0.0322263	0.444564	0.124314	0.318388	0.0841394	0.4306	0.5235	0.3955	0.2375	-0.0929	0.0351	0.1931	0.128	0.286	0.0929	0.0351	0.1931	0.128	0.286	TRUE	FALSE	FALSE	FALSE	FALSE	TRUE	FALSE	TRUE	TRUE	TRUE	TRUE	TRUE	TRUE
SE	ENSG00000063978	RNF4	chr4:2472714:2472836:+@chr4:2492064:2492229:+@chr4:2498734:2498848:+	0.75	0.78	0.84	0.82	0.73	0.88	0.85	0.85	0.0380498	0.328999	0.0499838	0.405971	0.119571	0.7656	0.8335	0.8105	0.8575	-0.0679	-0.0449	-0.0919	0.023	-0.024	0.0679	0.0449	0.0919	0.023	0.024	TRUE	FALSE	TRUE	FALSE	FALSE	TRUE	FALSE	FALSE	TRUE	FALSE	TRUE	TRUE	FALSE
SE	ENSG00000163697	APBB2	chr4:41102656:41102767:-@chr4:41067593:41067690:-@chr4:41035253:41035321:-	0.51	0.47	0.61	0.59	0.57	0.32	0.62	0.61	0.0360851	0.400987	0.0426533	0.216984	0.130091	0.4906	0.6035	0.4505	0.6225	-0.1129	0.0401	-0.1319	0.153	-0.019	0.1129	0.0401	0.1319	0.153	0.019	TRUE	FALSE	TRUE	FALSE	FALSE	TRUE	FALSE	FALSE	TRUE	FALSE	TRUE	TRUE	FALSE
SE	ENSG00000123737	EXOSC9	chr4:122724070:122724172:+@chr4:122725777:122725914:+@chr4:122728695:122728777:+	0.84	0.86	0.78	0.8	0.68	0.76	0.82	0.84	0.0287969	0.0919163	0.227518	0.164532	0.0487595	0.8506	0.7935	0.7255	0.8375	0.0571	0.1251	0.0131	0.068	-0.044	0.0571	0.1251	0.0131	0.068	0.044	TRUE	FALSE	FALSE	FALSE	FALSE	TRUE	FALSE	TRUE	TRUE	TRUE	TRUE	TRUE	TRUE
SE	ENSG00000108039	XPNPEP1	chr10:111637548:111637625:-@chr10:111635286:111635357:-@chr10:111633125:111633185:-	0.47	0.49	0.54	0.56	0.57	0.48	0.65	0.58	0.0183203	0.229201	0.065595	0.348211	0.13777	0.4806	0.5535	0.5305	0.6225	-0.0729	-0.0499	-0.1419	0.023	-0.069	0.0729	0.0499	0.1419	0.023	0.069	TRUE	FALSE	FALSE	FALSE	FALSE	TRUE	FALSE	TRUE	TRUE	TRUE	TRUE	TRUE	TRUE
SE	ENSG00000108039	XPNPEP1	chr10:111667449:111667573:-@chr10:111652770:111652833:-@chr10:111651480:111651584:-	0.84	0.89	0.76	0.72	0.73	0.84	0.83	0.76	0.0326325	0.193161	0.143627	0.274236	0.152594	0.8656	0.7435	0.7905	0.8025	0.1221	0.0751	0.0631	-0.047	-0.059	0.1221	0.0751	0.0631	0.047	0.059	TRUE	FALSE	FALSE	FALSE	FALSE	TRUE	FALSE	TRUE	TRUE	TRUE	TRUE	TRUE	TRUE
SE	ENSG00000165806	CASP7	chr10:115439426:115439737:+@chr10:115451723:115451829:+@chr10:115457253:115457362:+	0.42	0.5	0.73	0.62	0.55	0.46	0.56	0.64	0.0471521	0.245692	0.0610552	0.0722932	0.206582	0.4606	0.6785	0.5105	0.6075	-0.2179	-0.0499	-0.1469	0.168	0.071	0.2179	0.0499	0.1469	0.168	0.071	TRUE	FALSE	FALSE	FALSE	FALSE	TRUE	FALSE	TRUE	TRUE	TRUE	TRUE	TRUE	TRUE
SE	ENSG00000136758	YME1L1	chr10:27434357:27434519:-@chr10:27425205:27425314:-@chr10:27423760:27423910:-	0.78	0.78	0.87	0.87	0.76	0.78	0.74	0.9	3.53955e-05	0.356072	0.332081	0.0336991	0.33475	0.7806	0.8735	0.7755	0.8275	-0.0929	0.0051	-0.0469	0.098	0.046	0.0929	0.0051	0.0469	0.098	0.046	TRUE	FALSE	FALSE	TRUE	FALSE	TRUE	TRUE	TRUE	TRUE	TRUE	TRUE	TRUE	TRUE
SE	ENSG00000136754	ABI1	chr10:27054147:27054247:-@chr10:27047991:27048164:-@chr10:27044584:27044670:-	0.51	0.55	0.61	0.65	0.55	0.68	0.54	0.6	0.0342434	0.194193	0.171739	0.438403	0.141856	0.5306	0.6335	0.6205	0.5775	-0.1029	-0.0899	-0.0469	0.013	0.056	0.1029	0.0899	0.0469	0.013	0.056	TRUE	FALSE	FALSE	FALSE	FALSE	TRUE	FALSE	TRUE	TRUE	TRUE	TRUE	TRUE	TRUE
SE	ENSG00000120549	KIAA1217	chr10:24831622:24831699:+@chr10:24831812:24833410:+@chr10:24833910:24834032:+	0.67	0.69	0.57	0.59	0.62	0.59	0.61	0.47	0.0106174	0.0355034	0.15087	0.140981	0.347826	0.6806	0.5835	0.6105	0.5475	0.0971	0.0701	0.1331	-0.027	0.036	0.0971	0.0701	0.1331	0.027	0.036	TRUE	TRUE	FALSE	FALSE	FALSE	TRUE	FALSE	FALSE	TRUE	FALSE	TRUE	FALSE	TRUE
SE	NA	NA	chr10:102820999:102821872:+@chr10:102822299:102822860:+@chr10:102823963:102824178:+	0.93	0.96	0.85	0.85	0.9	0.88	0.92	0.89	0.0498768	0.0609022	0.12449	0.070383	0.0765243	0.9456	0.8535	0.8955	0.9125	0.0921	0.0501	0.0331	-0.042	-0.059	0.0921	0.0501	0.0331	0.042	0.059	TRUE	FALSE	FALSE	FALSE	FALSE	TRUE	FALSE	TRUE	TRUE	TRUE	TRUE	TRUE	TRUE
SE	ENSG00000136754	ABI1	chr10:27054147:27054247:-@chr10:27047991:27048167:-@chr10:27040527:27040712:-	0.89	0.9	0.84	0.84	0.8	0.73	0.84	0.83	0.0267512	0.0829792	0.00719558	0.140503	0.430471	0.8956	0.8435	0.7705	0.8425	0.0521	0.1251	0.0531	0.073	0.001	0.0521	0.1251	0.0531	0.073	0.001	TRUE	FALSE	TRUE	FALSE	FALSE	TRUE	FALSE	FALSE	TRUE	FALSE	TRUE	TRUE	FALSE
SE	ENSG00000107938	C10orf137	chr10:127414251:127414407:+@chr10:127417572:127417673:+@chr10:127417927:127418048:+	0.59	0.68	0.84	0.88	0.64	0.73	0.81	0.76	0.0405412	0.239856	0.0617972	0.06047	0.0801242	0.6356	0.8635	0.6905	0.7925	-0.2279	-0.0549	-0.1569	0.173	0.071	0.2279	0.0549	0.1569	0.173	0.071	TRUE	FALSE	FALSE	FALSE	FALSE	TRUE	FALSE	TRUE	TRUE	TRUE	TRUE	TRUE	TRUE
SE	ENSG00000119979	FAM45A	chr10:120863611:120863709:+@chr10:120864823:120865007:+@chr10:120867480:120867676:+	0.05	0.08	0.15	0.17	0.56	0.1	0.1	0.04	0.0197422	0.22402	0.381519	0.295226	0.0901532	0.0656	0.1635	0.3355	0.0775	-0.0979	-0.2699	-0.0119	-0.172	0.086	0.0979	0.2699	0.0119	0.172	0.086	TRUE	FALSE	FALSE	FALSE	FALSE	TRUE	FALSE	TRUE	TRUE	TRUE	TRUE	TRUE	TRUE
SE	ENSG00000107779	BMPR1A	chr10:88598622:88598736:+@chr10:88635624:88635842:+@chr10:88649819:88649981:+	0.93	0.91	0.87	0.86	0.75	0.81	0.78	0.85	0.0431686	0.0564275	0.099636	0.108971	0.20794	0.9206	0.8685	0.7855	0.8225	0.0521	0.1351	0.0981	0.083	0.046	0.0521	0.1351	0.0981	0.083	0.046	TRUE	FALSE	FALSE	FALSE	FALSE	TRUE	FALSE	TRUE	TRUE	TRUE	TRUE	TRUE	TRUE
SE	ENSG00000203791,ENSG00000258539	METTL10,RP11-12J10.3	chr10:126453961:126454177:-@chr10:126450869:126451127:-@chr10:126447406:126449072:-	0.44	0.45	0.38	0.4	0.39	0.32	0.37	0.24	0.0433956	0.120113	0.14297	0.254145	0.212114	0.4456	0.3935	0.3605	0.3125	0.0521	0.0851	0.1331	0.033	0.081	0.0521	0.0851	0.1331	0.033	0.081	TRUE	FALSE	FALSE	FALSE	FALSE	TRUE	FALSE	TRUE	TRUE	TRUE	TRUE	TRUE	TRUE
SE	ENSG00000099204	ABLIM1	chr10:116211383:116211430:-@chr10:116207639:116207779:-@chr10:116205071:116205162:-	0.58	0.61	0.47	0.45	0.63	0.56	0.43	0.54	0.0127379	0.456361	0.149905	0.0683577	0.346686	0.5956	0.4635	0.6005	0.4925	0.1321	-0.0049	0.1031	-0.137	-0.029	0.1321	0.0049	0.1031	0.137	0.029	TRUE	FALSE	FALSE	FALSE	FALSE	TRUE	FALSE	TRUE	TRUE	TRUE	TRUE	TRUE	TRUE
SE	ENSG00000148516	ZEB1	chr10:31610064:31610461:+@chr10:31676053:31676195:+@chr10:31749966:31750166:+	0.53	0.5	0.36	0.39	0.73	0.3	0.19	0.48	0.0122365	0.492734	0.221705	0.313781	0.422864	0.5156	0.3785	0.5205	0.3425	0.1371	-0.0049	0.1731	-0.142	0.036	0.1371	0.0049	0.1731	0.142	0.036	TRUE	FALSE	FALSE	FALSE	FALSE	TRUE	FALSE	TRUE	TRUE	TRUE	TRUE	TRUE	TRUE
SE	ENSG00000197142	ACSL5	chr10:114186016:114186117:+@chr10:114186546:114186617:+@chr10:114186976:114188138:+	0.82	0.8	0.92	0.92	0.91	0.86	0.94	0.86	0.0289773	0.0750374	0.1145	0.203247	0.377494	0.8106	0.9235	0.8905	0.9075	-0.1129	-0.0799	-0.0969	0.033	0.016	0.1129	0.0799	0.0969	0.033	0.016	TRUE	FALSE	FALSE	FALSE	FALSE	TRUE	FALSE	TRUE	TRUE	TRUE	TRUE	TRUE	TRUE
SE	ENSG00000148516	ZEB1	chr10:31608101:31608221:+@chr10:31749966:31750166:+@chr10:31784708:31784767:+	0.67	0.66	0.73	0.71	0.64	0.71	0.75	0.74	0.0270877	0.373587	0.00364744	0.215415	0.0785546	0.6656	0.7235	0.6805	0.7525	-0.0579	-0.0149	-0.0869	0.043	-0.029	0.0579	0.0149	0.0869	0.043	0.029	TRUE	FALSE	TRUE	FALSE	FALSE	TRUE	FALSE	FALSE	TRUE	FALSE	TRUE	TRUE	FALSE
SE	ENSG00000196139	AKR1C3	chr10:5122938:5123093:+@chr10:5123872:5124077:+@chr10:5138602:5138769:+	0.1	0.12	0.32	0.34	0.31	0.21	0.35	0.28	0.00209335	0.0930687	0.0419318	0.196715	0.402605	0.1106	0.3335	0.2655	0.3225	-0.2229	-0.1549	-0.2119	0.068	0.011	0.2229	0.1549	0.2119	0.068	0.011	TRUE	FALSE	TRUE	FALSE	FALSE	TRUE	FALSE	FALSE	TRUE	FALSE	TRUE	TRUE	FALSE
SE	ENSG00000166348	USP54	chr10:75265066:75265184:-@chr10:75264608:75264748:-@chr10:75260413:75260596:-	0.75	0.72	0.63	0.59	0.67	0.75	0.45	0.24	0.0216347	0.354566	0.0815216	0.0992662	0.116496	0.7356	0.6135	0.7155	0.3525	0.1221	0.0201	0.3831	-0.102	0.261	0.1221	0.0201	0.3831	0.102	0.261	TRUE	FALSE	FALSE	FALSE	FALSE	TRUE	FALSE	TRUE	TRUE	TRUE	TRUE	TRUE	TRUE
SE	ENSG00000120008	WDR11	chr10:122626081:122626276:+@chr10:122626578:122626681:+@chr10:122630682:122630858:+	0.97	0.95	0.89	0.9	0.83	0.88	0.93	0.87	0.0295376	0.0606349	0.150277	0.184025	0.405985	0.9606	0.8985	0.8605	0.9075	0.0621	0.1001	0.0531	0.038	-0.009	0.0621	0.1001	0.0531	0.038	0.009	TRUE	FALSE	FALSE	FALSE	FALSE	TRUE	FALSE	TRUE	TRUE	TRUE	TRUE	TRUE	TRUE
SE	ENSG00000108021	FAM208B	chr10:5726801:5727138:+@chr10:5751493:5751626:+@chr10:5754786:5754881:+	0.32	0.33	0.26	0.26	0.22	0.23	0.24	0.29	0.0223687	0.00317199	0.13846	0.0513962	0.392001	0.3256	0.2635	0.2305	0.2725	0.0621	0.0951	0.0531	0.033	-0.009	0.0621	0.0951	0.0531	0.033	0.009	TRUE	TRUE	FALSE	FALSE	FALSE	TRUE	FALSE	FALSE	TRUE	FALSE	TRUE	FALSE	TRUE
SE	ENSG00000197321	SVIL	chr10:29818634:29818773:-@chr10:29815890:29815985:-@chr10:29813401:29813644:-	0.09	0.09	0.03	0.03	0.04	0.08	0.04	0.02	8.95831e-05	0.217969	0.056092	0.181297	0.373152	0.0906	0.0335	0.0655	0.0375	0.0571	0.0251	0.0531	-0.032	-0.004	0.0571	0.0251	0.0531	0.032	0.004	TRUE	FALSE	FALSE	FALSE	FALSE	TRUE	FALSE	TRUE	TRUE	TRUE	TRUE	TRUE	TRUE
SE	ENSG00000095787	WAC	chr10:28879649:28879761:+@chr10:28884662:28884970:+@chr10:28897115:28897360:+	0.6	0.59	0.52	0.51	0.61	0.63	0.49	0.54	0.00458758	0.0837981	0.100609	0.0169545	0.450643	0.5956	0.5185	0.6255	0.5225	0.0771	-0.0299	0.0731	-0.107	-0.004	0.0771	0.0299	0.0731	0.107	0.004	TRUE	FALSE	FALSE	TRUE	FALSE	TRUE	TRUE	TRUE	TRUE	TRUE	TRUE	TRUE	TRUE
SE	ENSG00000224597	RP11-534G20.3	chr10:29704286:29704341:+@chr10:29747203:29747449:+@chr10:29771762:29774636:+	0.84	0.86	0.67	0.62	0.6	0.75	0.62	0.68	0.024253	0.130791	0.0384278	0.373267	0.420157	0.8506	0.6485	0.6805	0.6575	0.2021	0.1701	0.1931	-0.032	-0.009	0.2021	0.1701	0.1931	0.032	0.009	TRUE	FALSE	TRUE	FALSE	FALSE	TRUE	FALSE	FALSE	TRUE	FALSE	TRUE	TRUE	FALSE
SE	NA	NA	chr10:51387653:51387763:+@chr10:51729802:51730218:+@chr10:51732772:51734610:+	0.24	0.29	0.08	0.13	0.18	0.24	0.1	0.06	0.0236996	0.167105	0.0166285	0.059276	0.292077	0.2656	0.1085	0.2155	0.0875	0.1571	0.0501	0.1781	-0.107	0.021	0.1571	0.0501	0.1781	0.107	0.021	TRUE	FALSE	TRUE	FALSE	FALSE	TRUE	FALSE	FALSE	TRUE	FALSE	TRUE	TRUE	FALSE
SE	ENSG00000095485	CWF19L1	chr10:102020723:102020801:-@chr10:102016019:102016233:-@chr10:102013178:102013296:-	0.82	0.85	0.72	0.73	0.71	0.81	0.78	0.86	0.0289773	0.19269	0.438274	0.29847	0.121039	0.8356	0.7285	0.7655	0.8275	0.1071	0.0701	0.0081	-0.037	-0.099	0.1071	0.0701	0.0081	0.037	0.099	TRUE	FALSE	FALSE	FALSE	FALSE	TRUE	FALSE	TRUE	TRUE	TRUE	TRUE	TRUE	TRUE
SE	ENSG00000165813	C10orf118	chr10:115889650:115889730:-@chr10:115887220:115887430:-@chr10:115885645:115885864:-	0.89	0.88	0.81	0.82	0.79	0.86	0.8	0.69	0.00647647	0.179904	0.122318	0.396384	0.218973	0.8856	0.8185	0.8305	0.7525	0.0671	0.0551	0.1331	-0.012	0.066	0.0671	0.0551	0.1331	0.012	0.066	TRUE	FALSE	FALSE	FALSE	FALSE	TRUE	FALSE	TRUE	TRUE	TRUE	TRUE	TRUE	TRUE
SE	ENSG00000165406	42071	chr10:46089683:46090354:-@chr10:46048560:46048652:-@chr10:46028558:46028737:-	0.2	0.26	0.41	0.35	0.39	0.3	0.39	0.4	0.0336272	0.0863471	0.0495979	0.303852	0.317507	0.2306	0.3835	0.3505	0.4025	-0.1529	-0.1199	-0.1719	0.033	-0.019	0.1529	0.1199	0.1719	0.033	0.019	TRUE	FALSE	TRUE	FALSE	FALSE	TRUE	FALSE	FALSE	TRUE	FALSE	TRUE	TRUE	FALSE
SE	ENSG00000095794	CREM	chr10:35484830:35485070:+@chr10:35490379:35490414:+@chr10:35495823:35495979:+	0.29	0.36	0.59	0.63	0.25	0.42	0.38	0.4	0.0160705	0.446424	0.132721	0.0886697	0.0132251	0.3256	0.6135	0.3405	0.3975	-0.2879	-0.0149	-0.0719	0.273	0.216	0.2879	0.0149	0.0719	0.273	0.216	TRUE	FALSE	FALSE	FALSE	TRUE	TRUE	TRUE	TRUE	TRUE	TRUE	TRUE	TRUE	TRUE
SE	ENSG00000187522	HSPA14	chr10:14882074:14882156:+@chr10:14884133:14884845:+@chr10:14885370:14886747:+	0.69	0.76	0.53	0.56	0.77	0.66	0.6	0.6	0.0411	0.472675	0.0906848	0.087016	0.0816142	0.7256	0.5485	0.7205	0.6075	0.1771	0.0051	0.1181	-0.172	-0.059	0.1771	0.0051	0.1181	0.172	0.059	TRUE	FALSE	FALSE	FALSE	FALSE	TRUE	FALSE	TRUE	TRUE	TRUE	TRUE	TRUE	TRUE
SE	ENSG00000134470	IL15RA	chr10:6019368:6019574:-@chr10:6008108:6008302:-@chr10:6002330:6002530:-	0.76	0.81	0.66	0.69	0.64	0.79	0.41	0.77	0.042767	0.271302	0.242442	0.338294	0.365738	0.7856	0.6785	0.7205	0.5975	0.1071	0.0651	0.1881	-0.042	0.081	0.1071	0.0651	0.1881	0.042	0.081	TRUE	FALSE	FALSE	FALSE	FALSE	TRUE	FALSE	TRUE	TRUE	TRUE	TRUE	TRUE	TRUE
SE	NA	NA	chr13:73302042:73302145:+@chr13:73303064:73303231:+@chr13:73305419:73305525:+	0.79	0.8	0.88	0.9	0.83	0.76	0.88	0.85	0.0186926	0.455177	0.0470807	0.101571	0.185707	0.7956	0.8935	0.8005	0.8725	-0.0979	-0.0049	-0.0769	0.093	0.021	0.0979	0.0049	0.0769	0.093	0.021	TRUE	FALSE	TRUE	FALSE	FALSE	TRUE	FALSE	FALSE	TRUE	FALSE	TRUE	TRUE	FALSE
SE	ENSG00000176124	DLEU1	chr13:50656307:50656693:+@chr13:50657278:50657330:+@chr13:50678840:50679433:+	0.41	0.42	0.5	0.51	0.37	0.39	0.49	0.42	0.00331803	0.0869172	0.200376	0.0109817	0.202786	0.4156	0.5085	0.3855	0.4625	-0.0929	0.0301	-0.0469	0.123	0.046	0.0929	0.0301	0.0469	0.123	0.046	TRUE	FALSE	FALSE	TRUE	FALSE	TRUE	TRUE	TRUE	TRUE	TRUE	TRUE	TRUE	TRUE
SE	ENSG00000174032	SLC25A30	chr13:45992435:45992516:-@chr13:45985497:45985615:-@chr13:45983062:45983209:-	0.63	0.57	0.78	0.79	0.77	0.71	0.71	0.63	0.0466858	0.0379812	0.135323	0.18832	0.106007	0.6006	0.7885	0.7455	0.6775	-0.1879	-0.1449	-0.0769	0.043	0.111	0.1879	0.1449	0.0769	0.043	0.111	TRUE	TRUE	FALSE	FALSE	FALSE	TRUE	FALSE	FALSE	TRUE	FALSE	TRUE	FALSE	TRUE
SE	ENSG00000180776	ZDHHC20	chr13:22033193:22033508:-@chr13:21999791:21999817:-@chr13:21995200:21995303:-	0.8	0.77	0.88	0.89	0.82	0.79	0.84	0.84	0.0336708	0.180306	0.0774526	0.0424898	0.0413574	0.7856	0.8885	0.8105	0.8475	-0.1029	-0.0249	-0.0619	0.078	0.041	0.1029	0.0249	0.0619	0.078	0.041	TRUE	FALSE	FALSE	TRUE	FALSE	TRUE	TRUE	TRUE	TRUE	TRUE	TRUE	TRUE	TRUE
SE	ENSG00000150510	FAM124A	chr13:51805484:51805515:+@chr13:51819448:51819555:+@chr13:51825604:51826337:+	0.14	0.12	0.25	0.29	0.16	0.16	0.13	0.18	0.0244166	0.0918303	0.207113	0.0596209	0.0409677	0.1306	0.2735	0.1655	0.1625	-0.1429	-0.0349	-0.0319	0.108	0.111	0.1429	0.0349	0.0319	0.108	0.111	TRUE	FALSE	FALSE	FALSE	TRUE	TRUE	TRUE	TRUE	TRUE	TRUE	TRUE	TRUE	TRUE
SE	ENSG00000150401	DCUN1D2	chr13:114144982:114145023:-@chr13:114134890:114135058:-@chr13:114128439:114128569:-	0.74	0.76	0.47	0.55	0.54	0.59	0.71	0.56	0.0465847	0.0304009	0.19054	0.187324	0.150677	0.7506	0.5135	0.5705	0.6425	0.2371	0.1801	0.1081	-0.057	-0.129	0.2371	0.1801	0.1081	0.057	0.129	TRUE	TRUE	FALSE	FALSE	FALSE	TRUE	FALSE	FALSE	TRUE	FALSE	TRUE	FALSE	TRUE
SE	ENSG00000120694	HSPH1	chr13:31728770:31728892:-@chr13:31726989:31727088:-@chr13:31725084:31725328:-	0.15	0.12	0.07	0.05	0.13	0.05	0.07	0.06	0.0385812	0.24337	0.0649835	0.281955	0.255739	0.1356	0.0635	0.0955	0.0725	0.0721	0.0401	0.0631	-0.032	-0.009	0.0721	0.0401	0.0631	0.032	0.009	TRUE	FALSE	FALSE	FALSE	FALSE	TRUE	FALSE	TRUE	TRUE	TRUE	TRUE	TRUE	TRUE
SE	ENSG00000139668	WDFY2	chr13:52277732:52277786:+@chr13:52293334:52293484:+@chr13:52301814:52301926:+	0.43	0.46	0.59	0.54	0.57	0.63	0.48	0.56	0.035338	0.0381466	0.133422	0.224023	0.247048	0.4456	0.5685	0.6055	0.5275	-0.1229	-0.1599	-0.0819	-0.037	0.041	0.1229	0.1599	0.0819	0.037	0.041	TRUE	TRUE	FALSE	FALSE	FALSE	TRUE	FALSE	FALSE	TRUE	FALSE	TRUE	FALSE	TRUE
SE	ENSG00000083535	PIBF1	chr13:73401148:73401256:+@chr13:73401871:73402052:+@chr13:73409381:73409506:+	0.84	0.84	0.64	0.67	0.69	0.76	0.83	0.81	0.0269559	0.0992643	0.199558	0.129502	0.00999912	0.8406	0.6585	0.7305	0.8275	0.1821	0.1101	0.0131	-0.072	-0.169	0.1821	0.1101	0.0131	0.072	0.169	TRUE	FALSE	FALSE	FALSE	TRUE	TRUE	TRUE	TRUE	TRUE	TRUE	TRUE	TRUE	TRUE
SE	ENSG00000169062	UPF3A	chr13:115057109:115057267:+@chr13:115064315:115064475:+@chr13:115067206:115067500:+	0.94	0.91	0.77	0.8	0.92	0.91	0.79	0.83	0.0122365	0.39896	0.0295105	0.0283368	0.19181	0.9256	0.7885	0.9205	0.8175	0.1371	0.0051	0.1081	-0.132	-0.029	0.1371	0.0051	0.1081	0.132	0.029	TRUE	FALSE	TRUE	TRUE	FALSE	TRUE	TRUE	FALSE	TRUE	FALSE	TRUE	TRUE	FALSE
SE	ENSG00000100297,ENSG00000240293	MCM5,CTA-286B10.7	chr22:35799200:35799326:+@chr22:35799407:35799535:+@chr22:35802546:35802718:+	0.95	0.97	0.91	0.9	0.81	0.95	0.95	0.91	0.0368951	0.238907	0.216252	0.399641	0.183825	0.9606	0.9085	0.8855	0.9375	0.0521	0.0751	0.0231	0.023	-0.029	0.0521	0.0751	0.0231	0.023	0.029	TRUE	FALSE	FALSE	FALSE	FALSE	TRUE	FALSE	TRUE	TRUE	TRUE	TRUE	TRUE	TRUE
SE	ENSG00000099910	KLHL22	chr22:20850047:20850170:-@chr22:20847435:20847504:-@chr22:20843272:20843531:-	0.05	0.07	0.12	0.1	0.11	0.13	0.26	0.08	0.0297212	0.0227602	0.207053	0.243371	0.302175	0.0606	0.1135	0.1255	0.1775	-0.0529	-0.0649	-0.1169	-0.012	-0.064	0.0529	0.0649	0.1169	0.012	0.064	TRUE	TRUE	FALSE	FALSE	FALSE	TRUE	FALSE	FALSE	TRUE	FALSE	TRUE	FALSE	TRUE
SE	NA	NA	chr22:18165980:18166087:+@chr22:18171752:18171908:+@chr22:18209443:18213621:+	0.41	0.39	0.56	0.57	0.72	0.39	0.64	0.26	0.00668551	0.254318	0.407166	0.484534	0.331327	0.4006	0.5685	0.5605	0.4575	-0.1679	-0.1599	-0.0569	0.008	0.111	0.1679	0.1599	0.0569	0.008	0.111	TRUE	FALSE	FALSE	FALSE	FALSE	TRUE	FALSE	TRUE	TRUE	TRUE	TRUE	TRUE	TRUE
SE	ENSG00000100099	HPS4	chr22:26877688:26878206:-@chr22:26875231:26875321:-@chr22:26872959:26873102:-	0.87	0.86	0.93	0.94	0.83	0.91	0.93	0.9	0.00550347	0.423802	0.0629339	0.18002	0.229064	0.8656	0.9385	0.8755	0.9225	-0.0729	-0.0099	-0.0569	0.063	0.016	0.0729	0.0099	0.0569	0.063	0.016	TRUE	FALSE	FALSE	FALSE	FALSE	TRUE	FALSE	TRUE	TRUE	TRUE	TRUE	TRUE	TRUE
SE	ENSG00000100300	TSPO	chr22:43547520:43547610:+@chr22:43555216:43555426:+@chr22:43557058:43557196:+	0.91	0.93	0.84	0.85	0.81	0.89	0.91	0.91	0.0195128	0.171856	0.400591	0.445624	0.0244621	0.9206	0.8485	0.8555	0.9175	0.0721	0.0651	0.0031	-0.007	-0.069	0.0721	0.0651	0.0031	0.007	0.069	TRUE	FALSE	FALSE	FALSE	TRUE	TRUE	TRUE	TRUE	TRUE	TRUE	TRUE	TRUE	TRUE
SE	NA	NA	chr22:18171752:18171908:+@chr22:18178907:18178976:+@chr22:18209443:18213621:+	0.36	0.35	0.41	0.43	0.25	0.46	0.36	0.54	0.0268982	0.485231	0.230928	0.328555	0.385667	0.3556	0.4235	0.3605	0.4575	-0.0679	-0.0049	-0.1019	0.063	-0.034	0.0679	0.0049	0.1019	0.063	0.034	TRUE	FALSE	FALSE	FALSE	FALSE	TRUE	FALSE	TRUE	TRUE	TRUE	TRUE	TRUE	TRUE
SE	ENSG00000054611	TBC1D22A	chr22:47193341:47193517:+@chr22:47274549:47274619:+@chr22:47287162:47287290:+	0.7	0.68	0.77	0.8	0.62	0.82	0.84	0.84	0.022725	0.393664	0.020848	0.321525	0.0816142	0.6906	0.7885	0.7255	0.8475	-0.0979	-0.0349	-0.1569	0.063	-0.059	0.0979	0.0349	0.1569	0.063	0.059	TRUE	FALSE	TRUE	FALSE	FALSE	TRUE	FALSE	FALSE	TRUE	FALSE	TRUE	TRUE	FALSE
SE	ENSG00000015475	BID	chr22:18257147:18257261:-@chr22:18226569:18226779:-@chr22:18222115:18222254:-	0.83	0.86	0.73	0.73	0.56	0.66	0.9	0.79	0.0410696	0.0579039	0.460287	0.128704	0.136694	0.8456	0.7335	0.6155	0.8525	0.1121	0.2301	-0.0069	0.118	-0.119	0.1121	0.2301	0.0069	0.118	0.119	TRUE	FALSE	FALSE	FALSE	FALSE	TRUE	FALSE	TRUE	TRUE	TRUE	TRUE	TRUE	TRUE
SE	ENSG00000186575	NF2	chr22:29999545:30000101:+@chr22:30032740:30032865:+@chr22:30035079:30035201:+	0.55	0.63	0.85	0.87	0.91	0.74	0.72	0.88	0.0375203	0.0862938	0.0909124	0.38155	0.306237	0.5906	0.8635	0.8305	0.8075	-0.2729	-0.2399	-0.2169	0.033	0.056	0.2729	0.2399	0.2169	0.033	0.056	TRUE	FALSE	FALSE	FALSE	FALSE	TRUE	FALSE	TRUE	TRUE	TRUE	TRUE	TRUE	TRUE
SE	ENSG00000100330	MTMR3	chr22:30374925:30375041:+@chr22:30384469:30384551:+@chr22:30387493:30387659:+	0.87	0.87	0.76	0.75	0.7	0.81	0.64	0.83	0.0122249	0.148616	0.203915	0.488543	0.447173	0.8706	0.7585	0.7605	0.7425	0.1121	0.1101	0.1281	-0.002	0.016	0.1121	0.1101	0.1281	0.002	0.016	TRUE	FALSE	FALSE	FALSE	FALSE	TRUE	FALSE	TRUE	TRUE	TRUE	TRUE	TRUE	TRUE
SE	ENSG00000100031	GGT1	chr22:24999114:24999494:+@chr22:25003921:25003990:+@chr22:25005932:25006000:+	0.12	0.07	0.29	0.38	0.35	0.42	0.58	0.3	0.0335128	0.013612	0.115601	0.233725	0.287439	0.0956	0.3385	0.3905	0.4475	-0.2429	-0.2949	-0.3519	-0.052	-0.109	0.2429	0.2949	0.3519	0.052	0.109	TRUE	TRUE	FALSE	FALSE	FALSE	TRUE	FALSE	FALSE	TRUE	FALSE	TRUE	FALSE	TRUE
SE	ENSG00000100284	TOM1	chr22:35719021:35719170:+@chr22:35719512:35719623:+@chr22:35719761:35719907:+	0.81	0.79	0.66	0.68	0.5	0.72	0.67	0.5	0.00662784	0.170333	0.120648	0.346109	0.256032	0.8006	0.6735	0.6155	0.5925	0.1271	0.1851	0.2081	0.058	0.081	0.1271	0.1851	0.2081	0.058	0.081	TRUE	FALSE	FALSE	FALSE	FALSE	TRUE	FALSE	TRUE	TRUE	TRUE	TRUE	TRUE	TRUE
SE	ENSG00000241878	PISD	chr22:32024839:32024967:-@chr22:32023989:32024196:-@chr22:32021749:32022002:-	0.25	0.22	0.17	0.14	0.27	0.06	0.33	0.07	0.0340393	0.322441	0.432071	0.463686	0.384912	0.2356	0.1585	0.1705	0.2075	0.0771	0.0651	0.0281	-0.012	-0.049	0.0771	0.0651	0.0281	0.012	0.049	TRUE	FALSE	FALSE	FALSE	FALSE	TRUE	FALSE	TRUE	TRUE	TRUE	TRUE	TRUE	TRUE
SE	ENSG00000099917	MED15	chr22:20862339:20862731:+@chr22:20873165:20873282:+@chr22:20891404:20891491:+	0.42	0.46	0.28	0.25	0.42	0.33	0.29	0.23	0.0120676	0.193526	0.0258323	0.107879	0.489681	0.4406	0.2685	0.3805	0.2675	0.1721	0.0601	0.1731	-0.112	0.001	0.1721	0.0601	0.1731	0.112	0.001	TRUE	FALSE	TRUE	FALSE	FALSE	TRUE	FALSE	FALSE	TRUE	FALSE	TRUE	TRUE	FALSE
SE	ENSG00000184792,ENSG00000100330	OSBP2,MTMR3	chr22:31285164:31285221:+@chr22:31285477:31285623:+@chr22:31286715:31286960:+	0.66	0.64	0.48	0.48	0.63	0.64	0.63	0.61	0.0195731	0.252313	0.121849	0.0106246	0.0207064	0.6506	0.4835	0.6405	0.6275	0.1671	0.0101	0.0231	-0.157	-0.144	0.1671	0.0101	0.0231	0.157	0.144	TRUE	FALSE	FALSE	TRUE	TRUE	TRUE	TRUE	TRUE	TRUE	TRUE	TRUE	TRUE	TRUE
SE	ENSG00000100038	TOP3B	chr22:22337127:22337187:-@chr22:22336811:22336846:-@chr22:22330012:22330179:-	0.13	0.23	0.49	0.38	0.4	0.32	0.24	0.18	0.0368809	0.0530356	0.300323	0.20033	0.0509137	0.1806	0.4385	0.3655	0.2175	-0.2579	-0.1849	-0.0369	0.073	0.221	0.2579	0.1849	0.0369	0.073	0.221	TRUE	FALSE	FALSE	FALSE	FALSE	TRUE	FALSE	TRUE	TRUE	TRUE	TRUE	TRUE	TRUE
SE	NA	NA	chr22:26879640:26879829:-@chr22:26878712:26878839:-@chr22:26877688:26878206:-	0.03	0.03	0.09	0.08	0.12	0.12	0.04	0.04	0.0238804	3.39859e-05	0.000912729	0.0369736	0.0333141	0.0306	0.0885	0.1255	0.0475	-0.0579	-0.0949	-0.0169	-0.037	0.041	0.0579	0.0949	0.0169	0.037	0.041	TRUE	TRUE	FALSE	FALSE	FALSE	TRUE	FALSE	FALSE	TRUE	FALSE	TRUE	FALSE	TRUE
SE	NA	NA	chr18:45691502:45691628:-@chr18:45603307:45603374:-@chr18:45566271:45567494:-	0.36	0.31	0.44	0.49	0.44	0.26	0.61	0.47	0.033075	0.431001	0.0850934	0.208177	0.224115	0.3356	0.4685	0.3555	0.5475	-0.1329	-0.0199	-0.2119	0.113	-0.079	0.1329	0.0199	0.2119	0.113	0.079	TRUE	FALSE	FALSE	FALSE	FALSE	TRUE	FALSE	TRUE	TRUE	TRUE	TRUE	TRUE	TRUE
SE	ENSG00000101557	USP14	chr18:166787:166819:+@chr18:178933:179037:+@chr18:180236:180339:+	0.58	0.63	0.34	0.43	0.63	0.53	0.42	0.49	0.0403396	0.380834	0.046868	0.0501182	0.167347	0.6056	0.3885	0.5855	0.4625	0.2171	0.0201	0.1431	-0.197	-0.074	0.2171	0.0201	0.1431	0.197	0.074	TRUE	FALSE	TRUE	FALSE	FALSE	TRUE	FALSE	FALSE	TRUE	FALSE	TRUE	TRUE	FALSE
SE	ENSG00000134759	ELP2	chr18:33718233:33718389:+@chr18:33719382:33719576:+@chr18:33721100:33721164:+	0.55	0.59	0.46	0.44	0.52	0.41	0.53	0.52	0.0315521	0.147022	0.14526	0.403958	0.0202573	0.5706	0.4535	0.4705	0.5325	0.1171	0.1001	0.0381	-0.017	-0.079	0.1171	0.1001	0.0381	0.017	0.079	TRUE	FALSE	FALSE	FALSE	TRUE	TRUE	TRUE	TRUE	TRUE	TRUE	TRUE	TRUE	TRUE
SE	NA	NA	chr18:45691502:45691628:-@chr18:45688719:45688768:-@chr18:45566271:45567494:-	0.39	0.42	0.46	0.49	0.39	0.29	0.51	0.55	0.0380649	0.214372	0.0213073	0.101382	0.0789481	0.4056	0.4785	0.3455	0.5375	-0.0729	0.0601	-0.1319	0.133	-0.059	0.0729	0.0601	0.1319	0.133	0.059	TRUE	FALSE	TRUE	FALSE	FALSE	TRUE	FALSE	FALSE	TRUE	FALSE	TRUE	TRUE	FALSE
SE	ENSG00000197971	MBP	chr18:74728788:74729011:-@chr18:74702783:74702870:-@chr18:74701912:74702016:-	0.13	0.2	0.34	0.42	0.27	0.09	0.16	0.16	0.0285787	0.431782	0.482539	0.116953	0.0589754	0.1656	0.3835	0.1855	0.1675	-0.2179	-0.0199	-0.0019	0.198	0.216	0.2179	0.0199	0.0019	0.198	0.216	TRUE	FALSE	FALSE	FALSE	FALSE	TRUE	FALSE	TRUE	TRUE	TRUE	TRUE	TRUE	TRUE
SE	ENSG00000154864	PIEZO2	chr18:10689653:10689800:-@chr18:10682101:10682289:-@chr18:10681658:10681750:-	0.85	0.83	0.79	0.76	0.73	0.77	0.69	0.8	0.0422246	0.0508641	0.175502	0.232714	0.36085	0.8406	0.7785	0.7555	0.7525	0.0621	0.0851	0.0881	0.023	0.026	0.0621	0.0851	0.0881	0.023	0.026	TRUE	FALSE	FALSE	FALSE	FALSE	TRUE	FALSE	TRUE	TRUE	TRUE	TRUE	TRUE	TRUE
SE	ENSG00000131196	NFATC1	chr18:77155772:77156351:+@chr18:77170403:77171501:+@chr18:77193579:77193738:+	0.91	0.89	0.81	0.83	0.81	0.91	0.9	0.79	0.0174202	0.306071	0.268614	0.277999	0.344289	0.9006	0.8235	0.8655	0.8525	0.0771	0.0351	0.0481	-0.042	-0.029	0.0771	0.0351	0.0481	0.042	0.029	TRUE	FALSE	FALSE	FALSE	FALSE	TRUE	FALSE	TRUE	TRUE	TRUE	TRUE	TRUE	TRUE
SE	ENSG00000154040	CABYR	chr18:21723324:21723377:+@chr18:21730502:21730588:+@chr18:21735665:21736006:+	0.25	0.17	0.5	0.39	0.34	0.12	0.36	0.41	0.0407349	0.430105	0.0405614	0.133417	0.241382	0.2106	0.4485	0.2355	0.3925	-0.2379	-0.0249	-0.1819	0.213	0.056	0.2379	0.0249	0.1819	0.213	0.056	TRUE	FALSE	TRUE	FALSE	FALSE	TRUE	FALSE	FALSE	TRUE	FALSE	TRUE	TRUE	FALSE
SE	ENSG00000101745,ENSG00000265257	ANKRD12,RP11-21J18.1	chr18:9195549:9195696:+@chr18:9200512:9200642:+@chr18:9208655:9208801:+	0.18	0.18	0.09	0.1	0.08	0.05	0.23	0.08	0.0207896	0.0415798	0.424136	0.138945	0.273889	0.1806	0.0985	0.0705	0.1625	0.0821	0.1101	0.0181	0.028	-0.064	0.0821	0.1101	0.0181	0.028	0.064	TRUE	TRUE	FALSE	FALSE	FALSE	TRUE	FALSE	FALSE	TRUE	FALSE	TRUE	FALSE	TRUE
SE	ENSG00000060069	CTDP1	chr18:77488907:77489069:+@chr18:77496355:77496521:+@chr18:77513652:77514510:+	0.82	0.84	0.92	0.9	0.84	0.91	0.97	0.88	0.0127685	0.191288	0.125128	0.259294	0.371762	0.8306	0.9135	0.8805	0.9325	-0.0829	-0.0499	-0.1019	0.033	-0.019	0.0829	0.0499	0.1019	0.033	0.019	TRUE	FALSE	FALSE	FALSE	FALSE	TRUE	FALSE	TRUE	TRUE	TRUE	TRUE	TRUE	TRUE
SE	ENSG00000150477	KIAA1328	chr18:34752936:34753044:+@chr18:34773554:34773657:+@chr18:34801980:34805288:+	0.2	0.09	0.43	0.34	0.37	0.3	0.23	0.23	0.0404615	0.0593001	0.172673	0.244256	0.0912046	0.1456	0.3885	0.3405	0.2375	-0.2429	-0.1949	-0.0919	0.048	0.151	0.2429	0.1949	0.0919	0.048	0.151	TRUE	FALSE	FALSE	FALSE	FALSE	TRUE	FALSE	TRUE	TRUE	TRUE	TRUE	TRUE	TRUE
SE	ENSG00000186814	ZSCAN30	chr18:32870048:32870196:-@chr18:32847440:32847643:-@chr18:32843909:32844419:-	0.06	0.03	0.21	0.15	0.11	0.09	0.19	0.13	0.042413	0.0512053	0.0504614	0.102582	0.369134	0.0456	0.1835	0.1055	0.1675	-0.1379	-0.0599	-0.1219	0.078	0.016	0.1379	0.0599	0.1219	0.078	0.016	TRUE	FALSE	FALSE	FALSE	FALSE	TRUE	FALSE	TRUE	TRUE	TRUE	TRUE	TRUE	TRUE
SE	ENSG00000197563	PIGN	chr18:59830764:59830889:-@chr18:59829486:59829562:-@chr18:59828366:59828618:-	0.26	0.37	0.61	0.53	0.43	0.36	0.53	0.37	0.0358489	0.169509	0.14696	0.0414387	0.179681	0.3156	0.5735	0.4005	0.4575	-0.2579	-0.0849	-0.1419	0.173	0.116	0.2579	0.0849	0.1419	0.173	0.116	TRUE	FALSE	FALSE	TRUE	FALSE	TRUE	TRUE	TRUE	TRUE	TRUE	TRUE	TRUE	TRUE
SE	ENSG00000071991	CDH19	chr18:64271191:64271375:-@chr18:64263396:64263540:-@chr18:64239247:64239553:-	0.11	0.08	0.02	0.04	0.06	0.07	0.08	0.03	0.0470057	0.165032	0.194751	0.0627819	0.216469	0.0956	0.0335	0.0705	0.0625	0.0621	0.0251	0.0331	-0.037	-0.029	0.0621	0.0251	0.0331	0.037	0.029	TRUE	FALSE	FALSE	FALSE	FALSE	TRUE	FALSE	TRUE	TRUE	TRUE	TRUE	TRUE	TRUE
SE	ENSG00000132199	ENOSF1	chr18:706470:706578:-@chr18:697240:697355:-@chr18:694248:694334:-	0.88	0.9	0.81	0.78	0.8	0.85	0.85	0.81	0.0227027	0.112711	0.0897024	0.206773	0.129859	0.8906	0.7985	0.8305	0.8375	0.0921	0.0601	0.0531	-0.032	-0.039	0.0921	0.0601	0.0531	0.032	0.039	TRUE	FALSE	FALSE	FALSE	FALSE	TRUE	FALSE	TRUE	TRUE	TRUE	TRUE	TRUE	TRUE
SE	ENSG00000160285	LSS	chr21:47611795:47611873:-@chr21:47610990:47611149:-@chr21:47608360:47608735:-	0.59	0.55	0.83	0.77	0.65	0.88	0.63	0.61	0.0152405	0.163402	0.0883534	0.411949	0.0407566	0.5706	0.8035	0.7705	0.6275	-0.2329	-0.1999	-0.0569	0.033	0.176	0.2329	0.1999	0.0569	0.033	0.176	TRUE	FALSE	FALSE	FALSE	TRUE	TRUE	TRUE	TRUE	TRUE	TRUE	TRUE	TRUE	TRUE
SE	ENSG00000160285	LSS	chr21:47611795:47611873:-@chr21:47610980:47611149:-@chr21:47608360:47608735:-	0.65	0.59	0.76	0.71	0.61	0.84	0.66	0.62	0.0497859	0.255487	0.272719	0.478114	0.0533478	0.6206	0.7385	0.7305	0.6475	-0.1179	-0.1099	-0.0269	0.008	0.091	0.1179	0.1099	0.0269	0.008	0.091	TRUE	FALSE	FALSE	FALSE	FALSE	TRUE	FALSE	TRUE	TRUE	TRUE	TRUE	TRUE	TRUE
SE	ENSG00000159079	C21orf59	chr21:33984415:33984918:-@chr21:33982148:33982264:-@chr21:33979959:33980026:-	0.11	0.07	0.21	0.27	0.2	0.17	0.18	0.14	0.0333331	0.0338998	0.0563301	0.151252	0.0963013	0.0906	0.2435	0.1905	0.1675	-0.1529	-0.0999	-0.0769	0.053	0.076	0.1529	0.0999	0.0769	0.053	0.076	TRUE	TRUE	FALSE	FALSE	FALSE	TRUE	FALSE	FALSE	TRUE	FALSE	TRUE	FALSE	TRUE
SE	ENSG00000159216	RUNX1	chr21:36421139:36421255:-@chr21:36259140:36259393:-@chr21:36252854:36253010:-	0.67	0.68	0.73	0.74	0.72	0.77	0.8	0.74	0.00700043	0.0997969	0.0860914	0.360123	0.203444	0.6756	0.7385	0.7505	0.7775	-0.0629	-0.0749	-0.1019	-0.012	-0.039	0.0629	0.0749	0.1019	0.012	0.039	TRUE	FALSE	FALSE	FALSE	FALSE	TRUE	FALSE	TRUE	TRUE	TRUE	TRUE	TRUE	TRUE
SE	ENSG00000197381	ADARB1	chr21:46548317:46548488:+@chr21:46554630:46554747:+@chr21:46591525:46591599:+	0.29	0.22	0.52	0.58	0.32	0.69	0.44	0.46	0.0125146	0.197281	0.0444975	0.427674	0.0834124	0.2556	0.5535	0.5105	0.4575	-0.2979	-0.2549	-0.2019	0.043	0.096	0.2979	0.2549	0.2019	0.043	0.096	TRUE	FALSE	TRUE	FALSE	FALSE	TRUE	FALSE	FALSE	TRUE	FALSE	TRUE	TRUE	FALSE
SE	ENSG00000160305	DIP2A	chr21:47918495:47918746:+@chr21:47924274:47924402:+@chr21:47929170:47929289:+	0.79	0.77	0.67	0.7	0.35	0.67	0.64	0.75	0.0251604	0.172827	0.193692	0.237522	0.422	0.7806	0.6885	0.5155	0.7025	0.0921	0.2651	0.0781	0.173	-0.014	0.0921	0.2651	0.0781	0.173	0.014	TRUE	FALSE	FALSE	FALSE	FALSE	TRUE	FALSE	TRUE	TRUE	TRUE	TRUE	TRUE	TRUE
SE	ENSG00000159147	DONSON	chr21:34956896:34957074:-@chr21:34954471:34954552:-@chr21:34954257:34954361:-	0.35	0.35	0.51	0.49	0.61	0.45	0.38	0.26	0.0195889	0.129251	0.382123	0.378242	0.100068	0.3506	0.5035	0.5355	0.3275	-0.1529	-0.1849	0.0231	-0.032	0.176	0.1529	0.1849	0.0231	0.032	0.176	TRUE	FALSE	FALSE	FALSE	FALSE	TRUE	FALSE	TRUE	TRUE	TRUE	TRUE	TRUE	TRUE
RI	ENSG00000129292	PHF20L1	chr8:133826882-133827134:+@chr8:133829584-133829790:+	0.26	0.29	0.21	0.17	0.2	0.29	0.47	0.32	0.043221	0.339838	0.164963	0.206615	0.0999631	0.2756	0.1935	0.2505	0.4025	0.0821	0.0251	-0.1269	-0.057	-0.209	0.0821	0.0251	0.1269	0.057	0.209	TRUE	FALSE	FALSE	FALSE	FALSE	TRUE	FALSE	TRUE	TRUE	TRUE	TRUE	TRUE	TRUE
RI	ENSG00000160972	PPP1R16A	chr8:145725650-145725774:+@chr8:145725870-145725995:+	0.38	0.29	0.56	0.69	0.66	0.23	0.75	0.32	0.0396496	0.343417	0.253926	0.277694	0.379391	0.3356	0.6285	0.4505	0.5425	-0.2929	-0.1149	-0.2069	0.178	0.086	0.2929	0.1149	0.2069	0.178	0.086	TRUE	FALSE	FALSE	FALSE	FALSE	TRUE	FALSE	TRUE	TRUE	TRUE	TRUE	TRUE	TRUE
RI	ENSG00000170791	CHCHD7	chr8:57124348-57124733:+@chr8:57127157-57127226:+	0.85	0.8	0.67	0.7	0.82	0.74	0.82	0.79	0.0310959	0.248064	0.353858	0.106851	0.0141799	0.8256	0.6885	0.7855	0.8125	0.1371	0.0401	0.0131	-0.097	-0.124	0.1371	0.0401	0.0131	0.097	0.124	TRUE	FALSE	FALSE	FALSE	TRUE	TRUE	TRUE	TRUE	TRUE	TRUE	TRUE	TRUE	TRUE
RI	ENSG00000147475	ERLIN2	chr8:37602089-37602214:+@chr8:37603087-37604071:+	0.28	0.32	0.18	0.17	0.22	0.23	0.17	0.11	0.0439308	0.0762592	0.0315988	0.01008	0.240862	0.3006	0.1785	0.2305	0.1475	0.1221	0.0701	0.1531	-0.052	0.031	0.1221	0.0701	0.1531	0.052	0.031	TRUE	FALSE	TRUE	TRUE	FALSE	TRUE	TRUE	FALSE	TRUE	FALSE	TRUE	TRUE	FALSE
RI	ENSG00000147789	ZNF7	chr8:146054428-146054475:+@chr8:146054908-146054989:+	0.42	0.47	0.56	0.53	0.61	0.31	0.56	0.41	0.0467757	0.458006	0.32101	0.338621	0.294074	0.4456	0.5485	0.4655	0.4925	-0.1029	-0.0199	-0.0469	0.083	0.056	0.1029	0.0199	0.0469	0.083	0.056	TRUE	FALSE	FALSE	FALSE	FALSE	TRUE	FALSE	TRUE	TRUE	TRUE	TRUE	TRUE	TRUE
RI	ENSG00000178719	GRINA	chr8:145066046-145066246:+@chr8:145066413-145066541:+	0.23	0.22	0.16	0.14	0.2	0.14	0.15	0.16	0.0193444	0.165857	0.00730486	0.294914	0.258116	0.2256	0.1535	0.1755	0.1625	0.0721	0.0501	0.0631	-0.022	-0.009	0.0721	0.0501	0.0631	0.022	0.009	TRUE	FALSE	TRUE	FALSE	FALSE	TRUE	FALSE	FALSE	TRUE	FALSE	TRUE	TRUE	FALSE
RI	ENSG00000182325	FBXL6	chr8:145581162-145581099:-@chr8:145580781-145580650:-	0.29	0.3	0.6	0.65	0.42	0.69	0.69	0.32	0.0212325	0.150355	0.224318	0.351954	0.321134	0.2956	0.6285	0.5605	0.5125	-0.3329	-0.2649	-0.2169	0.068	0.116	0.3329	0.2649	0.2169	0.068	0.116	TRUE	FALSE	FALSE	FALSE	FALSE	TRUE	FALSE	TRUE	TRUE	TRUE	TRUE	TRUE	TRUE
RI	ENSG00000104679	R3HCC1	chr8:23147379-23147438:+@chr8:23147565-23147982:+	0.76	0.77	0.83	0.83	0.64	0.71	0.75	0.83	0.0204214	0.123473	0.287283	0.0725414	0.268696	0.7656	0.8335	0.6805	0.7975	-0.0679	0.0851	-0.0319	0.153	0.036	0.0679	0.0851	0.0319	0.153	0.036	TRUE	FALSE	FALSE	FALSE	FALSE	TRUE	FALSE	TRUE	TRUE	TRUE	TRUE	TRUE	TRUE
RI	ENSG00000076928	ARHGEF1	chr19:42396096-42396194:+@chr19:42396402-42396444:+	0.65	0.63	0.48	0.48	0.41	0.49	0.53	0.55	0.0208214	0.0596971	0.0121449	0.307451	0.0514374	0.6406	0.4835	0.4555	0.5475	0.1571	0.1851	0.0931	0.028	-0.064	0.1571	0.1851	0.0931	0.028	0.064	TRUE	FALSE	TRUE	FALSE	FALSE	TRUE	FALSE	FALSE	TRUE	FALSE	TRUE	TRUE	FALSE
RI	ENSG00000127507	EMR2	chr19:14877193-14877047:-@chr19:14876616-14876470:-	0.78	0.74	0.66	0.68	0.77	0.68	0.83	0.77	0.0485583	0.311636	0.167299	0.207146	0.05382	0.7606	0.6735	0.7305	0.8075	0.0871	0.0301	-0.0469	-0.057	-0.134	0.0871	0.0301	0.0469	0.057	0.134	TRUE	FALSE	FALSE	FALSE	FALSE	TRUE	FALSE	TRUE	TRUE	TRUE	TRUE	TRUE	TRUE
RI	ENSG00000105726	ATP13A1	chr19:19758568-19758408:-@chr19:19758337-19758223:-	0.14	0.15	0.24	0.24	0.3	0.21	0.14	0.16	0.0140535	0.116075	0.224025	0.383845	0.0383801	0.1456	0.2435	0.2605	0.1575	-0.0979	-0.1149	-0.0119	-0.017	0.086	0.0979	0.1149	0.0119	0.017	0.086	TRUE	FALSE	FALSE	FALSE	TRUE	TRUE	TRUE	TRUE	TRUE	TRUE	TRUE	TRUE	TRUE
RI	ENSG00000105135	ILVBL	chr19:15233841-15233703:-@chr19:15233615-15233504:-	0.34	0.31	0.11	0.15	0.46	0.17	0.07	0.26	0.010631	0.488785	0.174893	0.207837	0.376835	0.3256	0.1335	0.3205	0.1725	0.1921	0.0051	0.1531	-0.187	-0.039	0.1921	0.0051	0.1531	0.187	0.039	TRUE	FALSE	FALSE	FALSE	FALSE	TRUE	FALSE	TRUE	TRUE	TRUE	TRUE	TRUE	TRUE
RI	ENSG00000125733	TRIP10	chr19:6750303-6750442:+@chr19:6750523-6750644:+	0.54	0.61	0.76	0.81	0.74	0.82	0.6	0.79	0.0226935	0.0305615	0.197766	0.47832	0.264539	0.5756	0.7885	0.7855	0.7025	-0.2129	-0.2099	-0.1269	0.003	0.086	0.2129	0.2099	0.1269	0.003	0.086	TRUE	TRUE	FALSE	FALSE	FALSE	TRUE	FALSE	FALSE	TRUE	FALSE	TRUE	FALSE	TRUE
RI	ENSG00000105287	PRKD2	chr19:47220384-47220072:-@chr19:47219792-47219388:-	0.94	0.94	0.86	0.84	0.96	0.87	0.93	0.89	0.0343637	0.364956	0.223134	0.182533	0.0709088	0.9406	0.8535	0.9205	0.9175	0.0871	0.0201	0.0231	-0.067	-0.064	0.0871	0.0201	0.0231	0.067	0.064	TRUE	FALSE	FALSE	FALSE	FALSE	TRUE	FALSE	TRUE	TRUE	TRUE	TRUE	TRUE	TRUE
RI	ENSG00000130299	GTPBP3	chr19:17449763-17449835:+@chr19:17449932-17450075:+	0.34	0.33	0.19	0.23	0.35	0.26	0.48	0.26	0.0442601	0.33644	0.383679	0.118584	0.184181	0.3356	0.2135	0.3105	0.3775	0.1221	0.0251	-0.0419	-0.097	-0.164	0.1221	0.0251	0.0419	0.097	0.164	TRUE	FALSE	FALSE	FALSE	FALSE	TRUE	FALSE	TRUE	TRUE	TRUE	TRUE	TRUE	TRUE
RI	ENSG00000105221	AKT2	chr19:40742292-40742164:-@chr19:40742011-40741797:-	0.24	0.23	0.14	0.14	0.23	0.15	0.26	0.22	0.0178941	0.246652	0.32535	0.206769	0.0589004	0.2356	0.1435	0.1955	0.2475	0.0921	0.0401	-0.0119	-0.052	-0.104	0.0921	0.0401	0.0119	0.052	0.104	TRUE	FALSE	FALSE	FALSE	FALSE	TRUE	FALSE	TRUE	TRUE	TRUE	TRUE	TRUE	TRUE
RI	ENSG00000105518	TMEM205	chr19:11456981-11456684:-@chr19:11456304-11456196:-	0.59	0.54	0.41	0.34	0.55	0.45	0.33	0.37	0.0282469	0.211989	0.0132013	0.0925006	0.331571	0.5656	0.3785	0.5055	0.3575	0.1871	0.0601	0.2081	-0.127	0.021	0.1871	0.0601	0.2081	0.127	0.021	TRUE	FALSE	TRUE	FALSE	FALSE	TRUE	FALSE	FALSE	TRUE	FALSE	TRUE	TRUE	FALSE
RI	NA	NA	chr19:40904723-40904527:-@chr19:40903877-40899671:-	0.29	0.2	0.59	0.45	0.48	0.12	0.35	0.47	0.0481786	0.397984	0.0803855	0.212489	0.185442	0.2456	0.5235	0.3055	0.4175	-0.2779	-0.0599	-0.1719	0.218	0.106	0.2779	0.0599	0.1719	0.218	0.106	TRUE	FALSE	FALSE	FALSE	FALSE	TRUE	FALSE	TRUE	TRUE	TRUE	TRUE	TRUE	TRUE
RI	ENSG00000239382,ENSG00000248101	ALKBH6,AC002116.5	chr19:36501979-36501796:-@chr19:36501585-36501469:-	0.25	0.27	0.44	0.47	0.21	0.13	0.19	0.09	0.00760765	0.131238	0.126439	0.0290073	0.0388681	0.2606	0.4585	0.1755	0.1475	-0.1979	0.0851	0.1131	0.283	0.311	0.1979	0.0851	0.1131	0.283	0.311	TRUE	FALSE	FALSE	TRUE	TRUE	TRUE	TRUE	TRUE	TRUE	TRUE	TRUE	TRUE	TRUE
RI	ENSG00000142541	RPL13A	chr19:49994036-49994121:+@chr19:49994297-49994356:+	0.46	0.42	0.53	0.58	0.48	0.58	0.58	0.35	0.0369209	0.14178	0.413732	0.367699	0.294045	0.4406	0.5585	0.5355	0.4725	-0.1179	-0.0949	-0.0319	0.023	0.086	0.1179	0.0949	0.0319	0.023	0.086	TRUE	FALSE	FALSE	FALSE	FALSE	TRUE	FALSE	TRUE	TRUE	TRUE	TRUE	TRUE	TRUE
RI	ENSG00000196961	AP2A1	chr19:50303225-50303274:+@chr19:50303354-50303407:+	0.59	0.67	0.37	0.41	0.54	0.59	0.45	0.45	0.0299107	0.174111	0.0715631	0.017915	0.0985802	0.6306	0.3935	0.5705	0.4575	0.2371	0.0601	0.1731	-0.177	-0.064	0.2371	0.0601	0.1731	0.177	0.064	TRUE	FALSE	FALSE	TRUE	FALSE	TRUE	TRUE	TRUE	TRUE	TRUE	TRUE	TRUE	TRUE
RI	ENSG00000123154	WDR83	chr19:12780569-12780707:+@chr19:12780791-12780894:+	0.31	0.24	0.48	0.52	0.28	0.49	0.37	0.59	0.024539	0.231846	0.142732	0.237084	0.454407	0.2756	0.5035	0.3905	0.4875	-0.2279	-0.1149	-0.2119	0.113	0.016	0.2279	0.1149	0.2119	0.113	0.016	TRUE	FALSE	FALSE	FALSE	FALSE	TRUE	FALSE	TRUE	TRUE	TRUE	TRUE	TRUE	TRUE
RI	ENSG00000247240	RP11-10O17.2	chr15:74753606-74753759:+@chr15:74754224-74754372:+	0.89	0.88	0.78	0.79	0.77	0.86	0.82	0.87	0.00312509	0.192882	0.205672	0.304629	0.11451	0.8856	0.7885	0.8205	0.8525	0.0971	0.0651	0.0331	-0.032	-0.064	0.0971	0.0651	0.0331	0.032	0.064	TRUE	FALSE	FALSE	FALSE	FALSE	TRUE	FALSE	TRUE	TRUE	TRUE	TRUE	TRUE	TRUE
RI	ENSG00000140474	ULK3	chr15:75135017-75134880:-@chr15:75134790-75134621:-	0.81	0.79	0.72	0.73	0.64	0.53	0.75	0.57	0.023718	0.0755093	0.187135	0.118264	0.309506	0.8006	0.7285	0.5905	0.6675	0.0721	0.2101	0.1331	0.138	0.061	0.0721	0.2101	0.1331	0.138	0.061	TRUE	FALSE	FALSE	FALSE	FALSE	TRUE	FALSE	TRUE	TRUE	TRUE	TRUE	TRUE	TRUE
RI	ENSG00000171877	FRMD5	chr15:44166660-44166317:-@chr15:44166137-44165473:-	0.91	0.94	0.83	0.82	0.88	0.88	0.72	0.92	0.036645	0.110969	0.252874	0.0238175	0.496834	0.9256	0.8285	0.8855	0.8275	0.0971	0.0401	0.0981	-0.057	0.001	0.0971	0.0401	0.0981	0.057	0.001	TRUE	FALSE	FALSE	TRUE	FALSE	TRUE	TRUE	TRUE	TRUE	TRUE	TRUE	TRUE	TRUE
RI	ENSG00000168970,ENSG00000243789	JMJD7-PLA2G4B,JMJD7	chr15:42128673-42128749:+@chr15:42128979-42129138:+	0.31	0.27	0.46	0.46	0.39	0.23	0.18	0.69	0.0373072	0.403921	0.329205	0.156901	0.473896	0.2906	0.4635	0.3155	0.4425	-0.1729	-0.0249	-0.1519	0.148	0.021	0.1729	0.0249	0.1519	0.148	0.021	TRUE	FALSE	FALSE	FALSE	FALSE	TRUE	FALSE	TRUE	TRUE	TRUE	TRUE	TRUE	TRUE
RI	ENSG00000140497	SCAMP2	chr15:75146460-75146362:-@chr15:75144527-75144410:-	0.07	0.04	0.63	0.47	0.57	0.43	0.14	0.27	0.04546	0.0425486	0.118809	0.347347	0.0421913	0.0556	0.5535	0.5055	0.2125	-0.4979	-0.4499	-0.1569	0.048	0.341	0.4979	0.4499	0.1569	0.048	0.341	TRUE	TRUE	FALSE	FALSE	TRUE	TRUE	TRUE	FALSE	TRUE	FALSE	TRUE	FALSE	TRUE
RI	ENSG00000165516	KLHDC2	chr14:50246313-50246393:+@chr14:50246466-50246524:+	0.44	0.41	0.58	0.53	0.42	0.5	0.59	0.59	0.0303049	0.248573	0.0283223	0.107527	0.178496	0.4256	0.5585	0.4655	0.5975	-0.1329	-0.0399	-0.1719	0.093	-0.039	0.1329	0.0399	0.1719	0.093	0.039	TRUE	FALSE	TRUE	FALSE	FALSE	TRUE	FALSE	FALSE	TRUE	FALSE	TRUE	TRUE	FALSE
RI	NA	NA	chr14:69257209-69256244:-@chr14:69255526-69254372:-	0.92	0.94	0.88	0.86	0.9	0.85	0.91	0.89	0.0258303	0.130364	0.114671	0.413048	0.0635283	0.9306	0.8735	0.8805	0.9075	0.0571	0.0501	0.0231	-0.007	-0.034	0.0571	0.0501	0.0231	0.007	0.034	TRUE	FALSE	FALSE	FALSE	FALSE	TRUE	FALSE	TRUE	TRUE	TRUE	TRUE	TRUE	TRUE
RI	ENSG00000165792	METTL17	chr14:21458139-21458236:+@chr14:21458389-21458542:+	0.03	0.03	0.1	0.12	0.12	0.06	0.1	0.11	0.0399132	0.135774	0.0208407	0.325797	0.471282	0.0306	0.1135	0.0955	0.1125	-0.0829	-0.0649	-0.0819	0.018	0.001	0.0829	0.0649	0.0819	0.018	0.001	TRUE	FALSE	TRUE	FALSE	FALSE	TRUE	FALSE	FALSE	TRUE	FALSE	TRUE	TRUE	FALSE
RI	ENSG00000170638	TRABD	chr22:50636252-50636424:+@chr22:50636504-50636615:+	0.27	0.3	0.13	0.18	0.26	0.15	0.27	0.23	0.0365423	0.194525	0.187931	0.254425	0.0494014	0.2856	0.1585	0.2105	0.2575	0.1271	0.0751	0.0281	-0.052	-0.099	0.1271	0.0751	0.0281	0.052	0.099	TRUE	FALSE	FALSE	FALSE	TRUE	TRUE	TRUE	TRUE	TRUE	TRUE	TRUE	TRUE	TRUE
RI	ENSG00000185686	PRAME	chr22:22900000-22899965:-@chr22:22899350-22899232:-	0.58	0.57	0.41	0.44	0.56	0.56	0.58	0.57	0.0222649	0.155243	0.216328	0.0357306	0.0237133	0.5756	0.4285	0.5655	0.5825	0.1471	0.0101	-0.0069	-0.137	-0.154	0.1471	0.0101	0.0069	0.137	0.154	TRUE	FALSE	FALSE	TRUE	TRUE	TRUE	TRUE	TRUE	TRUE	TRUE	TRUE	TRUE	TRUE
RI	ENSG00000182944	EWSR1	chr22:29684595-29684775:+@chr22:29687551-29687588:+	0.56	0.67	0.32	0.2	0.64	0.26	0.28	0.23	0.0247156	0.274848	0.0300161	0.244362	0.4948	0.6156	0.2635	0.4555	0.2625	0.3521	0.1601	0.3531	-0.192	0.001	0.3521	0.1601	0.3531	0.192	0.001	TRUE	FALSE	TRUE	FALSE	FALSE	TRUE	FALSE	FALSE	TRUE	FALSE	TRUE	TRUE	FALSE
RI	ENSG00000100241	SBF1	chr22:50886038-50885951:-@chr22:50885882-50885751:-	0.12	0.17	0.41	0.45	0.22	0.43	0.3	0.58	0.00670548	0.159422	0.134745	0.252193	0.468464	0.1456	0.4335	0.3305	0.4475	-0.2879	-0.1849	-0.3019	0.103	-0.014	0.2879	0.1849	0.3019	0.103	0.014	TRUE	FALSE	FALSE	FALSE	FALSE	TRUE	FALSE	TRUE	TRUE	TRUE	TRUE	TRUE	TRUE
RI	ENSG00000100023	PPIL2	chr22:22049226-22049359:+@chr22:22049687-22049785:+	0.49	0.45	0.64	0.58	0.52	0.49	0.52	0.61	0.0348112	0.132437	0.115521	0.0651687	0.269822	0.4706	0.6135	0.5105	0.5725	-0.1429	-0.0399	-0.1019	0.103	0.041	0.1429	0.0399	0.1019	0.103	0.041	TRUE	FALSE	FALSE	FALSE	FALSE	TRUE	FALSE	TRUE	TRUE	TRUE	TRUE	TRUE	TRUE
RI	ENSG00000070413	DGCR2	chr22:19029472-19029320:-@chr22:19028807-19028571:-	0.04	0.04	0.09	0.09	0.06	0.03	0.05	0.03	0.000103639	0.309299	0.300007	0.103344	0.0644083	0.0406	0.0935	0.0505	0.0475	-0.0529	-0.0099	-0.0069	0.043	0.046	0.0529	0.0099	0.0069	0.043	0.046	TRUE	FALSE	FALSE	FALSE	FALSE	TRUE	FALSE	TRUE	TRUE	TRUE	TRUE	TRUE	TRUE
RI	ENSG00000182944	EWSR1	chr22:29684595-29684775:+@chr22:29687554-29687588:+	0.47	0.55	0.3	0.18	0.65	0.23	0.27	0.22	0.0399081	0.404347	0.0228378	0.253035	0.453465	0.5106	0.2435	0.4455	0.2525	0.2671	0.0651	0.2581	-0.202	-0.009	0.2671	0.0651	0.2581	0.202	0.009	TRUE	FALSE	TRUE	FALSE	FALSE	TRUE	FALSE	FALSE	TRUE	FALSE	TRUE	TRUE	FALSE
RI	ENSG00000100031	GGT1	chr22:25006217-25006303:+@chr22:25006422-25006498:+	0.65	0.66	0.49	0.52	0.58	0.64	0.56	0.56	0.0247015	0.205172	0.0156528	0.0639124	0.0816142	0.6556	0.5085	0.6155	0.5675	0.1471	0.0401	0.0881	-0.107	-0.059	0.1471	0.0401	0.0881	0.107	0.059	TRUE	FALSE	TRUE	FALSE	FALSE	TRUE	FALSE	FALSE	TRUE	FALSE	TRUE	TRUE	FALSE
RI	ENSG00000144591	GMPPA	chr2:220370180-220370277:+@chr2:220370437-220370483:+	0.46	0.48	0.63	0.61	0.55	0.41	0.55	0.38	0.00385769	0.432895	0.492855	0.146184	0.16093	0.4706	0.6235	0.4855	0.4725	-0.1529	-0.0149	-0.0019	0.138	0.151	0.1529	0.0149	0.0019	0.138	0.151	TRUE	FALSE	FALSE	FALSE	FALSE	TRUE	FALSE	TRUE	TRUE	TRUE	TRUE	TRUE	TRUE
RI	ENSG00000138385	SSB	chr2:170664987-170665063:+@chr2:170665370-170665412:+	0.51	0.53	0.45	0.42	0.48	0.69	0.5	0.43	0.0274505	0.313614	0.192334	0.19141	0.248471	0.5206	0.4385	0.5905	0.4725	0.0821	-0.0699	0.0481	-0.152	-0.034	0.0821	0.0699	0.0481	0.152	0.034	TRUE	FALSE	FALSE	FALSE	FALSE	TRUE	FALSE	TRUE	TRUE	TRUE	TRUE	TRUE	TRUE
RI	ENSG00000144354	CDCA7	chr2:174228546-174228623:+@chr2:174229523-174229717:+	0.21	0.18	0.13	0.09	0.13	0.12	0.07	0.07	0.0432638	0.0627627	0.0411344	0.270195	0.157936	0.1956	0.1135	0.1305	0.0775	0.0821	0.0651	0.1181	-0.017	0.036	0.0821	0.0651	0.1181	0.017	0.036	TRUE	FALSE	TRUE	FALSE	FALSE	TRUE	FALSE	FALSE	TRUE	FALSE	TRUE	TRUE	FALSE
RI	ENSG00000163516	ANKZF1	chr2:220098855-220099010:+@chr2:220099548-220100034:+	0.32	0.27	0.18	0.15	0.15	0.13	0.16	0.15	0.0363926	0.0381187	0.0556229	0.166559	0.375892	0.2956	0.1685	0.1455	0.1625	0.1271	0.1501	0.1331	0.023	0.006	0.1271	0.1501	0.1331	0.023	0.006	TRUE	TRUE	FALSE	FALSE	FALSE	TRUE	FALSE	FALSE	TRUE	FALSE	TRUE	FALSE	TRUE
RI	ENSG00000138434	SSFA2	chr2:182779943-182781732:+@chr2:182783325-182783402:+	0.21	0.19	0.15	0.13	0.15	0.11	0.16	0.12	0.0282858	0.0671278	0.0879798	0.379469	0.438069	0.2006	0.1435	0.1355	0.1475	0.0571	0.0651	0.0531	0.008	-0.004	0.0571	0.0651	0.0531	0.008	0.004	TRUE	FALSE	FALSE	FALSE	FALSE	TRUE	FALSE	TRUE	TRUE	TRUE	TRUE	TRUE	TRUE
RI	NA	NA	chr2:110303814-110303627:-@chr2:110301901-110300374:-	0.27	0.28	0.19	0.19	0.27	0.24	0.24	0.23	0.0168223	0.239689	0.0179081	0.0676602	0.027788	0.2756	0.1935	0.2605	0.2425	0.0821	0.0151	0.0331	-0.067	-0.049	0.0821	0.0151	0.0331	0.067	0.049	TRUE	FALSE	FALSE	FALSE	FALSE	TRUE	FALSE	TRUE	TRUE	TRUE	TRUE	TRUE	TRUE
RI	ENSG00000115548	KDM3A	chr2:86705000-86705152:+@chr2:86705293-86705388:+	0.2	0.17	0.29	0.28	0.39	0.18	0.15	0.13	0.037347	0.248329	0.0974529	0.49391	0.00893816	0.1856	0.2885	0.2905	0.1475	-0.1029	-0.1049	0.0381	-0.002	0.141	0.1029	0.1049	0.0381	0.002	0.141	TRUE	FALSE	FALSE	FALSE	TRUE	TRUE	TRUE	TRUE	TRUE	TRUE	TRUE	TRUE	TRUE
RI	ENSG00000136718	IMP4	chr2:131102949-131103058:+@chr2:131103140-131103272:+	0.25	0.27	0.39	0.36	0.16	0.22	0.18	0.18	0.0150079	0.128626	0.0412057	0.0318251	0.0239963	0.2606	0.3785	0.1955	0.1875	-0.1179	0.0651	0.0731	0.183	0.191	0.1179	0.0651	0.0731	0.183	0.191	TRUE	FALSE	TRUE	TRUE	TRUE	TRUE	TRUE	FALSE	TRUE	FALSE	TRUE	TRUE	FALSE
RI	ENSG00000115307	AUP1	chr2:74756409-74756259:-@chr2:74756062-74755878:-	0.3	0.34	0.24	0.22	0.25	0.26	0.27	0.29	0.0474611	0.0899738	0.154825	0.0816526	0.0316858	0.3206	0.2335	0.2605	0.2875	0.0871	0.0601	0.0331	-0.027	-0.054	0.0871	0.0601	0.0331	0.027	0.054	TRUE	FALSE	FALSE	FALSE	TRUE	TRUE	TRUE	TRUE	TRUE	TRUE	TRUE	TRUE	TRUE
RI	ENSG00000197756	RPL37A	chr2:217364672-217364754:+@chr2:217366064-217366190:+	0.2	0.18	0.36	0.42	0.71	0.16	0.18	0.24	0.0347705	0.26486	0.267483	0.446089	0.0275708	0.1906	0.3935	0.4405	0.2175	-0.2029	-0.2499	-0.0269	-0.047	0.176	0.2029	0.2499	0.0269	0.047	0.176	TRUE	FALSE	FALSE	FALSE	TRUE	TRUE	TRUE	TRUE	TRUE	TRUE	TRUE	TRUE	TRUE
RI	ENSG00000171863	RPS7	chr2:3622948-3623038:+@chr2:3623191-3623274:+	0.55	0.58	0.5	0.48	0.51	0.55	0.55	0.49	0.0345742	0.1826	0.200927	0.127021	0.222495	0.5656	0.4935	0.5355	0.5275	0.0721	0.0301	0.0381	-0.042	-0.034	0.0721	0.0301	0.0381	0.042	0.034	TRUE	FALSE	FALSE	FALSE	FALSE	TRUE	FALSE	TRUE	TRUE	TRUE	TRUE	TRUE	TRUE
RI	ENSG00000127824	TUBA4A	chr2:220116435-220116287:-@chr2:220116045-220115916:-	0.17	0.16	0.1	0.09	0.14	0.09	0.08	0.11	0.00598214	0.15308	0.0617931	0.265901	0.420337	0.1656	0.0985	0.1205	0.1025	0.0671	0.0451	0.0631	-0.022	-0.004	0.0671	0.0451	0.0631	0.022	0.004	TRUE	FALSE	FALSE	FALSE	FALSE	TRUE	FALSE	TRUE	TRUE	TRUE	TRUE	TRUE	TRUE
RI	ENSG00000135976	ANKRD36	chr2:97914881-97914951:+@chr2:97915289-97915382:+	0.57	0.6	0.44	0.37	0.51	0.46	0.49	0.58	0.0423708	0.0520226	0.255624	0.102921	0.0763021	0.5856	0.4085	0.4905	0.5425	0.1771	0.0951	0.0431	-0.082	-0.134	0.1771	0.0951	0.0431	0.082	0.134	TRUE	FALSE	FALSE	FALSE	FALSE	TRUE	FALSE	TRUE	TRUE	TRUE	TRUE	TRUE	TRUE
RI	NA	NA	chr2:135710800-135711949:+@chr2:135712051-135716915:+	0.62	0.68	0.76	0.79	0.74	0.86	0.68	0.74	0.0473218	0.0969529	0.128122	0.366728	0.129039	0.6506	0.7785	0.8055	0.7175	-0.1279	-0.1549	-0.0669	-0.027	0.061	0.1279	0.1549	0.0669	0.027	0.061	TRUE	FALSE	FALSE	FALSE	FALSE	TRUE	FALSE	TRUE	TRUE	TRUE	TRUE	TRUE	TRUE
RI	ENSG00000115657,ENSG00000198925	ABCB6,ATG9A	chr2:220075545-220075433:-@chr2:220075197-220075103:-	0.35	0.25	0.56	0.65	0.37	0.59	0.6	0.41	0.023115	0.157707	0.112208	0.227287	0.243528	0.3006	0.6085	0.4855	0.5125	-0.3079	-0.1849	-0.2119	0.123	0.096	0.3079	0.1849	0.2119	0.123	0.096	TRUE	FALSE	FALSE	FALSE	FALSE	TRUE	FALSE	TRUE	TRUE	TRUE	TRUE	TRUE	TRUE
RI	ENSG00000115274,ENSG00000239779	INO80B,WBP1	chr2:74686565-74686679:+@chr2:74686770-74686872:+	0.64	0.65	0.58	0.57	0.57	0.69	0.53	0.66	0.00454364	0.447376	0.314672	0.259228	0.388223	0.6456	0.5785	0.6355	0.6025	0.0671	0.0101	0.0431	-0.057	-0.024	0.0671	0.0101	0.0431	0.057	0.024	TRUE	FALSE	FALSE	FALSE	FALSE	TRUE	FALSE	TRUE	TRUE	TRUE	TRUE	TRUE	TRUE
RI	ENSG00000103496	STX4	chr16:31050862-31050972:+@chr16:31051044-31051139:+	0.14	0.12	0.27	0.23	0.39	0.26	0.58	0.14	0.0271027	0.0955465	0.237734	0.21701	0.347497	0.1306	0.2535	0.3305	0.3675	-0.1229	-0.1999	-0.2369	-0.077	-0.114	0.1229	0.1999	0.2369	0.077	0.114	TRUE	FALSE	FALSE	FALSE	FALSE	TRUE	FALSE	TRUE	TRUE	TRUE	TRUE	TRUE	TRUE
RI	ENSG00000185324	CDK10	chr16:89759682-89759875:+@chr16:89760581-89760640:+	0.7	0.72	0.4	0.32	0.38	0.39	0.6	0.34	0.0295891	0.00185382	0.160762	0.308837	0.267976	0.7106	0.3635	0.3905	0.4775	0.3471	0.3201	0.2331	-0.027	-0.114	0.3471	0.3201	0.2331	0.027	0.114	TRUE	TRUE	FALSE	FALSE	FALSE	TRUE	FALSE	FALSE	TRUE	FALSE	TRUE	FALSE	TRUE
RI	ENSG00000103145	HCFC1R1	chr16:3073531-3073475:-@chr16:3073362-3073234:-	0.73	0.74	0.6	0.61	0.64	0.68	0.71	0.73	0.00181364	0.0834641	0.290232	0.100493	0.011538	0.7356	0.6085	0.6655	0.7275	0.1271	0.0701	0.0081	-0.057	-0.119	0.1271	0.0701	0.0081	0.057	0.119	TRUE	FALSE	FALSE	FALSE	TRUE	TRUE	TRUE	TRUE	TRUE	TRUE	TRUE	TRUE	TRUE
RI	ENSG00000103253,ENSG00000102854	HAGHL,MSLN	chr16:778794-778895:+@chr16:779009-779715:+	0.33	0.4	0.56	0.64	0.26	0.23	0.29	0.34	0.0243784	0.0735639	0.214696	0.0242369	0.0203603	0.3656	0.6035	0.2505	0.3225	-0.2379	0.1151	0.0431	0.353	0.281	0.2379	0.1151	0.0431	0.353	0.281	TRUE	FALSE	FALSE	TRUE	TRUE	TRUE	TRUE	TRUE	TRUE	TRUE	TRUE	TRUE	TRUE
RI	ENSG00000103024	NME3	chr16:1821411-1821281:-@chr16:1821192-1821071:-	0.89	0.83	0.74	0.69	0.73	0.76	0.8	0.78	0.0362562	0.0611466	0.132395	0.201084	0.0783617	0.8606	0.7185	0.7505	0.7975	0.1421	0.1101	0.0631	-0.032	-0.079	0.1421	0.1101	0.0631	0.032	0.079	TRUE	FALSE	FALSE	FALSE	FALSE	TRUE	FALSE	TRUE	TRUE	TRUE	TRUE	TRUE	TRUE
RI	ENSG00000168488	ATXN2L	chr16:28847254-28847806:+@chr16:28848049-28848558:+	0.95	0.98	0.86	0.89	0.91	0.95	0.88	0.89	0.0276114	0.1826	0.0465905	0.0830884	0.263442	0.9656	0.8785	0.9355	0.8925	0.0871	0.0301	0.0731	-0.057	-0.014	0.0871	0.0301	0.0731	0.057	0.014	TRUE	FALSE	TRUE	FALSE	FALSE	TRUE	FALSE	FALSE	TRUE	FALSE	TRUE	TRUE	FALSE
RI	ENSG00000140983,ENSG00000102854	RHOT2,MSLN	chr16:720123-720175:+@chr16:720266-720357:+	0.51	0.54	0.4	0.44	0.45	0.49	0.51	0.5	0.0329376	0.0991081	0.264789	0.107365	0.0653009	0.5256	0.4235	0.4755	0.5125	0.1021	0.0501	0.0131	-0.052	-0.089	0.1021	0.0501	0.0131	0.052	0.089	TRUE	FALSE	FALSE	FALSE	FALSE	TRUE	FALSE	TRUE	TRUE	TRUE	TRUE	TRUE	TRUE
RI	ENSG00000167508	MVD	chr16:88724437-88724323:-@chr16:88723990-88723844:-	0.59	0.57	0.28	0.33	0.69	0.26	0.53	0.31	0.0167658	0.361016	0.196816	0.284459	0.233999	0.5806	0.3085	0.4805	0.4275	0.2721	0.1001	0.1531	-0.172	-0.119	0.2721	0.1001	0.1531	0.172	0.119	TRUE	FALSE	FALSE	FALSE	FALSE	TRUE	FALSE	TRUE	TRUE	TRUE	TRUE	TRUE	TRUE
RI	ENSG00000168488	ATXN2L	chr16:28846599-28846720:+@chr16:28846876-28847079:+	0.4	0.51	0.74	0.81	0.69	0.55	0.53	0.75	0.0258306	0.100783	0.150929	0.115391	0.21777	0.4556	0.7785	0.6255	0.6475	-0.3229	-0.1699	-0.1919	0.153	0.131	0.3229	0.1699	0.1919	0.153	0.131	TRUE	FALSE	FALSE	FALSE	FALSE	TRUE	FALSE	TRUE	TRUE	TRUE	TRUE	TRUE	TRUE
RI	ENSG00000102901	CENPT	chr16:67866448-67866358:-@chr16:67866218-67866131:-	0.58	0.61	0.39	0.33	0.55	0.61	0.53	0.51	0.0209924	0.401329	0.0378724	0.0173636	0.0442765	0.5956	0.3635	0.5855	0.5275	0.2321	0.0101	0.0681	-0.222	-0.164	0.2321	0.0101	0.0681	0.222	0.164	TRUE	FALSE	TRUE	TRUE	TRUE	TRUE	TRUE	FALSE	TRUE	FALSE	TRUE	TRUE	FALSE
RI	ENSG00000155666	KDM8	chr16:27221414-27221688:+@chr16:27221903-27221942:+	0.64	0.63	0.79	0.78	0.72	0.73	0.66	0.67	0.0012284	0.00327018	0.0204983	0.00820958	0.00219592	0.6356	0.7885	0.7305	0.6725	-0.1529	-0.0949	-0.0369	0.058	0.116	0.1529	0.0949	0.0369	0.058	0.116	TRUE	TRUE	FALSE	TRUE	TRUE	TRUE	TRUE	FALSE	TRUE	FALSE	TRUE	FALSE	TRUE
RI	ENSG00000127586	CHTF18	chr16:838931-839125:+@chr16:839210-839360:+	0.1	0.13	0.17	0.19	0.14	0.11	0.09	0.09	0.0368357	0.272124	0.215968	0.0544667	0.0383801	0.1156	0.1835	0.1305	0.0975	-0.0679	-0.0149	0.0181	0.053	0.086	0.0679	0.0149	0.0181	0.053	0.086	TRUE	FALSE	FALSE	FALSE	TRUE	TRUE	TRUE	TRUE	TRUE	TRUE	TRUE	TRUE	TRUE
RI	ENSG00000158805	ZNF276	chr16:89789545-89789591:+@chr16:89789687-89790117:+	0.51	0.41	0.29	0.21	0.67	0.35	0.22	0.38	0.0450369	0.395416	0.135474	0.168229	0.313625	0.4606	0.2535	0.5155	0.3075	0.2071	-0.0549	0.1531	-0.262	-0.054	0.2071	0.0549	0.1531	0.262	0.054	TRUE	FALSE	FALSE	FALSE	FALSE	TRUE	FALSE	TRUE	TRUE	TRUE	TRUE	TRUE	TRUE
RI	ENSG00000103160	HSDL1	chr16:84164036-84163942:-@chr16:84163776-84163591:-	0.96	0.97	0.91	0.9	0.9	0.93	0.91	0.95	0.00624128	0.0940994	0.196695	0.288975	0.191914	0.9656	0.9085	0.9205	0.9375	0.0571	0.0451	0.0281	-0.012	-0.029	0.0571	0.0451	0.0281	0.012	0.029	TRUE	FALSE	FALSE	FALSE	FALSE	TRUE	FALSE	TRUE	TRUE	TRUE	TRUE	TRUE	TRUE
RI	ENSG00000161996,ENSG00000102854	WDR90,MSLN	chr16:716455-716598:+@chr16:716673-716792:+	0.45	0.5	0.6	0.57	0.51	0.53	0.58	0.32	0.0407048	0.129894	0.45598	0.0411744	0.247521	0.4756	0.5885	0.5255	0.4575	-0.1129	-0.0499	0.0181	0.063	0.131	0.1129	0.0499	0.0181	0.063	0.131	TRUE	FALSE	FALSE	TRUE	FALSE	TRUE	TRUE	TRUE	TRUE	TRUE	TRUE	TRUE	TRUE
RI	ENSG00000149930	TAOK2	chr16:29997586-29997825:+@chr16:29999680-29999719:+	0.33	0.29	0.56	0.5	0.23	0.39	0.32	0.28	0.0164376	0.480815	0.461288	0.0972368	0.0166143	0.3106	0.5335	0.3155	0.3075	-0.2229	-0.0049	0.0031	0.218	0.226	0.2229	0.0049	0.0031	0.218	0.226	TRUE	FALSE	FALSE	FALSE	TRUE	TRUE	TRUE	TRUE	TRUE	TRUE	TRUE	TRUE	TRUE
RI	ENSG00000161996,ENSG00000102854	WDR90,MSLN	chr16:705773-705885:+@chr16:706302-706537:+	0.8	0.81	0.76	0.74	0.79	0.8	0.78	0.73	0.0355705	0.276336	0.160704	0.0367085	0.389632	0.8056	0.7535	0.8005	0.7625	0.0521	0.0051	0.0431	-0.047	-0.009	0.0521	0.0051	0.0431	0.047	0.009	TRUE	FALSE	FALSE	FALSE	FALSE	TRUE	FALSE	TRUE	TRUE	TRUE	TRUE	TRUE	TRUE
RI	ENSG00000146802	TMEM168	chr7:112425008-112424910:-@chr7:112423811-112423753:-	0.63	0.57	0.44	0.5	0.55	0.56	0.5	0.4	0.0490898	0.203937	0.0788857	0.102708	0.406747	0.6006	0.4735	0.5605	0.4575	0.1271	0.0401	0.1431	-0.087	0.016	0.1271	0.0401	0.1431	0.087	0.016	TRUE	FALSE	FALSE	FALSE	FALSE	TRUE	FALSE	TRUE	TRUE	TRUE	TRUE	TRUE	TRUE
RI	ENSG00000127980	PEX1	chr7:92131393-92131204:-@chr7:92130987-92130821:-	0.18	0.18	0.12	0.13	0.08	0.2	0.07	0.1	0.032844	0.332662	0.0553375	0.412856	0.115728	0.1806	0.1285	0.1455	0.0925	0.0521	0.0351	0.0881	-0.017	0.036	0.0521	0.0351	0.0881	0.017	0.036	TRUE	FALSE	FALSE	FALSE	FALSE	TRUE	FALSE	TRUE	TRUE	TRUE	TRUE	TRUE	TRUE
RI	ENSG00000164896	FASTK	chr7:150774114-150774000:-@chr7:150773919-150773713:-	0.27	0.23	0.51	0.58	0.43	0.39	0.44	0.26	0.016369	0.0140968	0.21865	0.0565772	0.124355	0.2506	0.5485	0.4155	0.3575	-0.2979	-0.1649	-0.1069	0.133	0.191	0.2979	0.1649	0.1069	0.133	0.191	TRUE	TRUE	FALSE	FALSE	FALSE	TRUE	FALSE	FALSE	TRUE	FALSE	TRUE	FALSE	TRUE
RI	ENSG00000223705	NSUN5P1	chr7:75042067-75042210:+@chr7:75044163-75044301:+	0.92	0.91	0.82	0.83	0.85	0.89	0.93	0.83	0.0038748	0.142812	0.335574	0.122212	0.221332	0.9156	0.8285	0.8755	0.8875	0.0871	0.0401	0.0281	-0.047	-0.059	0.0871	0.0401	0.0281	0.047	0.059	TRUE	FALSE	FALSE	FALSE	FALSE	TRUE	FALSE	TRUE	TRUE	TRUE	TRUE	TRUE	TRUE
RI	ENSG00000136271	DDX56	chr7:44613524-44613435:-@chr7:44613343-44613182:-	0.15	0.13	0.26	0.22	0.34	0.22	0.19	0.17	0.0351562	0.119883	0.0402329	0.303582	0.0841429	0.1406	0.2435	0.2855	0.1875	-0.1029	-0.1449	-0.0469	-0.042	0.056	0.1029	0.1449	0.0469	0.042	0.056	TRUE	FALSE	FALSE	FALSE	FALSE	TRUE	FALSE	TRUE	TRUE	TRUE	TRUE	TRUE	TRUE
RI	ENSG00000082014	SMARCD3	chr7:150938739-150938578:-@chr7:150937608-150937511:-	0.48	0.38	0.12	0.21	0.13	0.09	0.24	0.43	0.0310228	0.0348056	0.261391	0.219268	0.143872	0.4306	0.1685	0.1155	0.3425	0.2621	0.3151	0.0881	0.053	-0.174	0.2621	0.3151	0.0881	0.053	0.174	TRUE	TRUE	FALSE	FALSE	FALSE	TRUE	FALSE	FALSE	TRUE	FALSE	TRUE	FALSE	TRUE
RI	ENSG00000105821	DNAJC2	chr7:102963241-102963150:-@chr7:102963079-102962958:-	0.8	0.79	0.68	0.7	0.69	0.93	0.68	0.79	0.0148134	0.447913	0.256596	0.247631	0.268574	0.7956	0.6935	0.8155	0.7425	0.1021	-0.0199	0.0531	-0.122	-0.049	0.1021	0.0199	0.0531	0.122	0.049	TRUE	FALSE	FALSE	FALSE	FALSE	TRUE	FALSE	TRUE	TRUE	TRUE	TRUE	TRUE	TRUE
RI	ENSG00000146828	SLC12A9	chr7:100457772-100457854:+@chr7:100458760-100458884:+	0.47	0.46	0.63	0.59	0.59	0.46	0.69	0.5	0.033085	0.248651	0.192003	0.204599	0.463304	0.4656	0.6135	0.5305	0.6025	-0.1479	-0.0649	-0.1369	0.083	0.011	0.1479	0.0649	0.1369	0.083	0.011	TRUE	FALSE	FALSE	FALSE	FALSE	TRUE	FALSE	TRUE	TRUE	TRUE	TRUE	TRUE	TRUE
RI	ENSG00000133624	ZNF767	chr7:149246465-149246284:-@chr7:149244867-149244245:-	0.95	0.94	0.86	0.87	0.91	0.85	0.93	0.89	0.00492897	0.141144	0.187146	0.333423	0.110672	0.9456	0.8685	0.8855	0.9175	0.0771	0.0601	0.0281	-0.017	-0.049	0.0771	0.0601	0.0281	0.017	0.049	TRUE	FALSE	FALSE	FALSE	FALSE	TRUE	FALSE	TRUE	TRUE	TRUE	TRUE	TRUE	TRUE
RI	ENSG00000122557	HERPUD2	chr7:35734745-35734411:-@chr7:35734237-35733794:-	0.55	0.43	0.69	0.77	0.47	0.74	0.62	0.61	0.0474023	0.26725	0.135938	0.262929	0.109555	0.4906	0.7335	0.6105	0.6225	-0.2429	-0.1199	-0.1319	0.123	0.111	0.2429	0.1199	0.1319	0.123	0.111	TRUE	FALSE	FALSE	FALSE	FALSE	TRUE	FALSE	TRUE	TRUE	TRUE	TRUE	TRUE	TRUE
RI	ENSG00000251537,ENSG00000221926	RP11-385D13.1,TRIM16	chr17:15532512-15532188:-@chr17:15531375-15531280:-	0.83	0.79	0.89	0.92	0.84	0.85	0.76	0.85	0.0346372	0.142524	0.487173	0.0677541	0.128749	0.8106	0.9085	0.8505	0.8125	-0.0979	-0.0399	-0.0019	0.058	0.096	0.0979	0.0399	0.0019	0.058	0.096	TRUE	FALSE	FALSE	FALSE	FALSE	TRUE	FALSE	TRUE	TRUE	TRUE	TRUE	TRUE	TRUE
RI	ENSG00000008838	MED24	chr17:38190024-38189896:-@chr17:38189709-38189598:-	0.73	0.69	0.55	0.61	0.6	0.65	0.72	0.62	0.0448469	0.0698276	0.312659	0.180925	0.135662	0.7106	0.5835	0.6305	0.6775	0.1271	0.0801	0.0331	-0.047	-0.094	0.1271	0.0801	0.0331	0.047	0.094	TRUE	FALSE	FALSE	FALSE	FALSE	TRUE	FALSE	TRUE	TRUE	TRUE	TRUE	TRUE	TRUE
RI	ENSG00000169718	DUS1L	chr17:80019597-80019433:-@chr17:80019229-80019085:-	0.59	0.65	0.48	0.42	0.42	0.28	0.23	0.26	0.0286149	0.061702	0.0100465	0.186475	0.0244716	0.6206	0.4535	0.3555	0.2525	0.1671	0.2651	0.3681	0.098	0.201	0.1671	0.2651	0.3681	0.098	0.201	TRUE	FALSE	TRUE	FALSE	TRUE	TRUE	TRUE	FALSE	TRUE	FALSE	TRUE	TRUE	FALSE
RI	NA	NA	chr17:1617308-1616997:-@chr17:1615693-1614798:-	0.74	0.73	0.58	0.62	0.51	0.51	0.61	0.55	0.0405436	0.00738399	0.057863	0.0727606	0.352101	0.7356	0.6035	0.5155	0.5875	0.1321	0.2201	0.1481	0.088	0.016	0.1321	0.2201	0.1481	0.088	0.016	TRUE	TRUE	FALSE	FALSE	FALSE	TRUE	FALSE	FALSE	TRUE	FALSE	TRUE	FALSE	TRUE
RI	ENSG00000179094	PER1	chr17:8048311-8048069:-@chr17:8047586-8047374:-	0.72	0.66	0.32	0.35	0.62	0.53	0.54	0.4	0.0115711	0.097182	0.0801268	0.0438154	0.141784	0.6906	0.3385	0.5805	0.4775	0.3521	0.1101	0.2131	-0.242	-0.139	0.3521	0.1101	0.2131	0.242	0.139	TRUE	FALSE	FALSE	TRUE	FALSE	TRUE	TRUE	TRUE	TRUE	TRUE	TRUE	TRUE	TRUE
RI	ENSG00000187531	SIRT7	chr17:79872578-79872480:-@chr17:79872406-79872170:-	0.35	0.34	0.16	0.1	0.26	0.28	0.35	0.21	0.0397538	0.0256833	0.278161	0.050212	0.118029	0.3456	0.1335	0.2755	0.2875	0.2121	0.0701	0.0581	-0.142	-0.154	0.2121	0.0701	0.0581	0.142	0.154	TRUE	TRUE	FALSE	FALSE	FALSE	TRUE	FALSE	FALSE	TRUE	FALSE	TRUE	FALSE	TRUE
RI	ENSG00000007202	KIAA0100	chr17:26967043-26966919:-@chr17:26966660-26966593:-	0.61	0.54	0.29	0.36	0.3	0.31	0.22	0.52	0.0193928	0.0391889	0.202803	0.350602	0.400235	0.5756	0.3285	0.3105	0.3775	0.2471	0.2651	0.1981	0.018	-0.049	0.2471	0.2651	0.1981	0.018	0.049	TRUE	TRUE	FALSE	FALSE	FALSE	TRUE	FALSE	FALSE	TRUE	FALSE	TRUE	FALSE	TRUE
RI	ENSG00000215099,ENSG00000129197	AC004148.1,RPAIN	chr17:5329291-5329619:+@chr17:5331391-5331531:+	0.5	0.51	0.58	0.56	0.59	0.57	0.71	0.48	0.0245548	0.0195051	0.276383	0.233004	0.421082	0.5056	0.5735	0.5855	0.6025	-0.0679	-0.0799	-0.0969	-0.012	-0.029	0.0679	0.0799	0.0969	0.012	0.029	TRUE	TRUE	FALSE	FALSE	FALSE	TRUE	FALSE	FALSE	TRUE	FALSE	TRUE	FALSE	TRUE
RI	NA	NA	chr17:74733583-74733965:+@chr17:74734364-74734530:+	0.73	0.79	0.54	0.5	0.44	0.7	0.6	0.59	0.0154578	0.191272	0.0556332	0.379396	0.0695797	0.7606	0.5235	0.5755	0.6025	0.2371	0.1851	0.1581	-0.052	-0.079	0.2371	0.1851	0.1581	0.052	0.079	TRUE	FALSE	FALSE	FALSE	FALSE	TRUE	FALSE	TRUE	TRUE	TRUE	TRUE	TRUE	TRUE
RI	ENSG00000108848	LUC7L3	chr17:48827862-48828055:+@chr17:48829561-48830072:+	0.59	0.64	0.33	0.25	0.45	0.32	0.38	0.29	0.0157972	0.071747	0.0273962	0.175021	0.248922	0.6156	0.2935	0.3905	0.3425	0.3221	0.2251	0.2731	-0.097	-0.049	0.3221	0.2251	0.2731	0.097	0.049	TRUE	FALSE	TRUE	FALSE	FALSE	TRUE	FALSE	FALSE	TRUE	FALSE	TRUE	TRUE	FALSE
RI	ENSG00000072778	ACADVL	chr17:7127132-7127177:+@chr17:7127287-7127388:+	0.48	0.51	0.59	0.64	0.44	0.39	0.47	0.49	0.0384292	0.0731142	0.350208	0.0152785	0.043006	0.4956	0.6185	0.4205	0.4875	-0.1229	0.0751	0.0081	0.198	0.131	0.1229	0.0751	0.0081	0.198	0.131	TRUE	FALSE	FALSE	TRUE	TRUE	TRUE	TRUE	TRUE	TRUE	TRUE	TRUE	TRUE	TRUE
RI	ENSG00000175061	C17orf76-AS1	chr17:16342352-16342374:+@chr17:16342641-16342728:+	0.62	0.59	0.47	0.44	0.47	0.55	0.48	0.51	0.0101242	0.119753	0.0210504	0.188382	0.0872416	0.6056	0.4585	0.5155	0.5025	0.1471	0.0901	0.1031	-0.057	-0.044	0.1471	0.0901	0.1031	0.057	0.044	TRUE	FALSE	TRUE	FALSE	FALSE	TRUE	FALSE	FALSE	TRUE	FALSE	TRUE	TRUE	FALSE
RI	ENSG00000161955,ENSG00000239697	TNFSF13,TNFSF12	chr17:7464041-7464134:+@chr17:7464316-7464925:+	0.93	0.92	0.86	0.84	0.75	0.87	0.92	0.94	0.0193444	0.158989	0.224363	0.321235	0.0139486	0.9256	0.8535	0.8155	0.9375	0.0721	0.1101	-0.0119	0.038	-0.084	0.0721	0.1101	0.0119	0.038	0.084	TRUE	FALSE	FALSE	FALSE	TRUE	TRUE	TRUE	TRUE	TRUE	TRUE	TRUE	TRUE	TRUE
RI	ENSG00000135502	SLC26A10	chr12:58019365-58019535:+@chr12:58019781-58019933:+	0.9	0.93	0.86	0.84	0.78	0.88	0.86	0.83	0.043808	0.171834	0.0459603	0.39123	0.479984	0.9156	0.8535	0.8355	0.8525	0.0621	0.0801	0.0631	0.018	0.001	0.0621	0.0801	0.0631	0.018	0.001	TRUE	FALSE	TRUE	FALSE	FALSE	TRUE	FALSE	FALSE	TRUE	FALSE	TRUE	TRUE	FALSE
RI	ENSG00000184575	XPOT	chr12:64818818-64818918:+@chr12:64819118-64819237:+	0.87	0.88	0.8	0.77	0.73	0.79	0.8	0.74	0.0407155	0.0826318	0.0893842	0.294589	0.389863	0.8756	0.7885	0.7655	0.7775	0.0871	0.1101	0.0981	0.023	0.011	0.0871	0.1101	0.0981	0.023	0.011	TRUE	FALSE	FALSE	FALSE	FALSE	TRUE	FALSE	TRUE	TRUE	TRUE	TRUE	TRUE	TRUE
RI	ENSG00000170421	KRT8	chr12:53295003-53294943:-@chr12:53294467-53294372:-	0.63	0.63	0.55	0.55	0.49	0.4	0.46	0.53	5.05142e-05	0.0770927	0.086033	0.129795	0.193542	0.6306	0.5535	0.4505	0.5025	0.0771	0.1801	0.1281	0.103	0.051	0.0771	0.1801	0.1281	0.103	0.051	TRUE	FALSE	FALSE	FALSE	FALSE	TRUE	FALSE	TRUE	TRUE	TRUE	TRUE	TRUE	TRUE
RI	ENSG00000111325,ENSG00000256028	OGFOD2,RP11-197N18.2	chr12:123461418-123461517:+@chr12:123462907-123463116:+	0.28	0.21	0.51	0.49	0.18	0.19	0.27	0.18	0.0350846	0.179396	0.420085	0.00184387	0.0458539	0.2456	0.5035	0.1905	0.2325	-0.2579	0.0551	0.0131	0.313	0.271	0.2579	0.0551	0.0131	0.313	0.271	TRUE	FALSE	FALSE	TRUE	TRUE	TRUE	TRUE	TRUE	TRUE	TRUE	TRUE	TRUE	TRUE
RI	ENSG00000111325,ENSG00000256028	OGFOD2,RP11-197N18.2	chr12:123460358-123460414:+@chr12:123461201-123461314:+	0.55	0.54	0.44	0.47	0.6	0.55	0.38	0.51	0.0421192	0.190808	0.194527	0.0345903	0.471133	0.5456	0.4585	0.5805	0.4525	0.0871	-0.0349	0.0931	-0.122	0.006	0.0871	0.0349	0.0931	0.122	0.006	TRUE	FALSE	FALSE	TRUE	FALSE	TRUE	TRUE	TRUE	TRUE	TRUE	TRUE	TRUE	TRUE
RI	ENSG00000226210	ABC7-42389800N19.1	chr12:87872-88017:+@chr12:88257-88392:+	0.88	0.87	0.77	0.77	0.64	0.76	0.78	0.82	0.0161166	0.107588	0.0836687	0.231438	0.172642	0.8756	0.7735	0.7055	0.8075	0.1021	0.1701	0.0681	0.068	-0.034	0.1021	0.1701	0.0681	0.068	0.034	TRUE	FALSE	FALSE	FALSE	FALSE	TRUE	FALSE	TRUE	TRUE	TRUE	TRUE	TRUE	TRUE
RI	ENSG00000166986	MARS	chr12:57909703-57909774:+@chr12:57909922-57909941:+	0.41	0.44	0.56	0.56	0.55	0.62	0.61	0.41	0.0334333	0.0489153	0.261764	0.293021	0.362158	0.4256	0.5635	0.5905	0.5175	-0.1379	-0.1649	-0.0919	-0.027	0.046	0.1379	0.1649	0.0919	0.027	0.046	TRUE	TRUE	FALSE	FALSE	FALSE	TRUE	FALSE	FALSE	TRUE	FALSE	TRUE	FALSE	TRUE
RI	ENSG00000122965	RBM19	chr12:114261126-114261014:-@chr12:114260451-114259859:-	0.67	0.67	0.79	0.82	0.47	0.49	0.64	0.64	0.0355455	0.0179105	0.000503224	0.00287346	0.0304297	0.6706	0.8085	0.4855	0.6475	-0.1379	0.1851	0.0231	0.323	0.161	0.1379	0.1851	0.0231	0.323	0.161	TRUE	TRUE	FALSE	TRUE	TRUE	TRUE	TRUE	FALSE	TRUE	FALSE	TRUE	FALSE	TRUE
RI	ENSG00000122965	RBM19	chr12:114261126-114261014:-@chr12:114260451-114259862:-	0.66	0.66	0.8	0.81	0.47	0.49	0.66	0.63	0.0114809	0.018934	0.337836	0.00257147	0.0177642	0.6606	0.8085	0.4855	0.6525	-0.1479	0.1751	0.0081	0.323	0.156	0.1479	0.1751	0.0081	0.323	0.156	TRUE	TRUE	FALSE	TRUE	TRUE	TRUE	TRUE	FALSE	TRUE	FALSE	TRUE	FALSE	TRUE
RI	ENSG00000012822	CALCOCO1	chr12:54108025-54107917:-@chr12:54107684-54107485:-	0.3	0.31	0.14	0.17	0.4	0.24	0.29	0.21	0.0247015	0.421947	0.217866	0.136727	0.104439	0.3056	0.1585	0.3255	0.2575	0.1471	-0.0199	0.0481	-0.167	-0.099	0.1471	0.0199	0.0481	0.167	0.099	TRUE	FALSE	FALSE	FALSE	FALSE	TRUE	FALSE	TRUE	TRUE	TRUE	TRUE	TRUE	TRUE
RI	ENSG00000166986	MARS	chr12:57909703-57909774:+@chr12:57910028-57910120:+	0.59	0.64	0.35	0.3	0.67	0.61	0.64	0.52	0.0071558	0.260031	0.361361	0.00789193	0.0530629	0.6156	0.3285	0.6455	0.5875	0.2871	-0.0299	0.0281	-0.317	-0.259	0.2871	0.0299	0.0281	0.317	0.259	TRUE	FALSE	FALSE	TRUE	FALSE	TRUE	TRUE	TRUE	TRUE	TRUE	TRUE	TRUE	TRUE
RI	ENSG00000088986	DYNLL1	chr12:120933916-120934019:+@chr12:120934219-120934356:+	0.27	0.27	0.35	0.34	0.31	0.28	0.37	0.35	0.0176829	0.143627	0.0309001	0.0809954	0.130091	0.2706	0.3485	0.3005	0.3675	-0.0779	-0.0299	-0.0969	0.048	-0.019	0.0779	0.0299	0.0969	0.048	0.019	TRUE	FALSE	TRUE	FALSE	FALSE	TRUE	FALSE	FALSE	TRUE	FALSE	TRUE	TRUE	FALSE
RI	ENSG00000123349	PFDN5	chr12:53690214-53690335:+@chr12:53691634-53691708:+	0.73	0.68	0.55	0.56	0.66	0.78	0.62	0.6	0.0482249	0.400979	0.0727507	0.109412	0.0259445	0.7056	0.5585	0.7255	0.6175	0.1471	-0.0199	0.0881	-0.167	-0.059	0.1471	0.0199	0.0881	0.167	0.059	TRUE	FALSE	FALSE	FALSE	TRUE	TRUE	TRUE	TRUE	TRUE	TRUE	TRUE	TRUE	TRUE
RI	ENSG00000012822	CALCOCO1	chr12:54106990-54106884:-@chr12:54105905-54104903:-	0.34	0.29	0.2	0.13	0.29	0.11	0.23	0.11	0.0423829	0.212475	0.111941	0.376808	0.455199	0.3156	0.1685	0.2055	0.1775	0.1471	0.1101	0.1381	-0.037	-0.009	0.1471	0.1101	0.1381	0.037	0.009	TRUE	FALSE	FALSE	FALSE	FALSE	TRUE	FALSE	TRUE	TRUE	TRUE	TRUE	TRUE	TRUE
RI	ENSG00000166888	STAT6	chr12:57500122-57499974:-@chr12:57499382-57499251:-	0.22	0.18	0.3	0.26	0.26	0.11	0.16	0.23	0.0496075	0.457524	0.48406	0.210633	0.109428	0.2006	0.2835	0.1905	0.2025	-0.0829	0.0101	-0.0019	0.093	0.081	0.0829	0.0101	0.0019	0.093	0.081	TRUE	FALSE	FALSE	FALSE	FALSE	TRUE	FALSE	TRUE	TRUE	TRUE	TRUE	TRUE	TRUE
RI	ENSG00000126749,ENSG00000255896	EMG1,U47924.19	chr12:7083714-7083855:+@chr12:7084252-7084310:+	0.12	0.11	0.04	0.06	0.04	0.07	0.02	0.11	0.0305994	0.0723478	0.257996	0.374341	0.374377	0.1156	0.0535	0.0605	0.0725	0.0621	0.0551	0.0431	-0.007	-0.019	0.0621	0.0551	0.0431	0.007	0.019	TRUE	FALSE	FALSE	FALSE	FALSE	TRUE	FALSE	TRUE	TRUE	TRUE	TRUE	TRUE	TRUE
RI	ENSG00000135452	TSPAN31	chr12:58139959-58140039:+@chr12:58140372-58140503:+	0.4	0.39	0.19	0.12	0.09	0.16	0.26	0.14	0.0427823	0.0394243	0.0962674	0.314341	0.282704	0.3956	0.1585	0.1305	0.2075	0.2371	0.2651	0.1881	0.028	-0.049	0.2371	0.2651	0.1881	0.028	0.049	TRUE	TRUE	FALSE	FALSE	FALSE	TRUE	FALSE	FALSE	TRUE	FALSE	TRUE	FALSE	TRUE
RI	ENSG00000065357	DGKA	chr12:56333199-56333313:+@chr12:56334098-56334217:+	0.67	0.64	0.55	0.54	0.66	0.49	0.65	0.46	0.0356703	0.267577	0.251153	0.384779	0.453194	0.6556	0.5485	0.5805	0.5625	0.1071	0.0751	0.0931	-0.032	-0.014	0.1071	0.0751	0.0931	0.032	0.014	TRUE	FALSE	FALSE	FALSE	FALSE	TRUE	FALSE	TRUE	TRUE	TRUE	TRUE	TRUE	TRUE
RI	ENSG00000111077	TENC1	chr12:53456404-53456475:+@chr12:53456873-53457041:+	0.74	0.74	0.64	0.63	0.47	0.6	0.57	0.52	0.0134406	0.10069	0.0411924	0.187074	0.0834238	0.7406	0.6385	0.5405	0.5525	0.1021	0.2001	0.1881	0.098	0.086	0.1021	0.2001	0.1881	0.098	0.086	TRUE	FALSE	TRUE	FALSE	FALSE	TRUE	FALSE	FALSE	TRUE	FALSE	TRUE	TRUE	FALSE
RI	ENSG00000065357	DGKA	chr12:56333199-56333313:+@chr12:56333866-56333954:+	0.35	0.41	0.64	0.64	0.51	0.32	0.59	0.49	0.0356527	0.37361	0.0638087	0.127583	0.151525	0.3806	0.6435	0.4205	0.5475	-0.2629	-0.0399	-0.1669	0.223	0.096	0.2629	0.0399	0.1669	0.223	0.096	TRUE	FALSE	FALSE	FALSE	FALSE	TRUE	FALSE	TRUE	TRUE	TRUE	TRUE	TRUE	TRUE
RI	ENSG00000156976	EIF4A2	chr3:186502353-186502485:+@chr3:186503672-186503840:+	0.3	0.32	0.38	0.35	0.42	0.26	0.4	0.27	0.0480954	0.368355	0.353791	0.41059	0.378323	0.3106	0.3685	0.3455	0.3425	-0.0579	-0.0349	-0.0319	0.023	0.026	0.0579	0.0349	0.0319	0.023	0.026	TRUE	FALSE	FALSE	FALSE	FALSE	TRUE	FALSE	TRUE	TRUE	TRUE	TRUE	TRUE	TRUE
RI	ENSG00000214021,ENSG00000250151	TTLL3,ARPC4-TTLL3	chr3:9859329-9860604:+@chr3:9862230-9862425:+	0.92	0.93	0.73	0.68	0.86	0.71	0.86	0.85	0.0317038	0.159955	0.00512856	0.230155	0.0457485	0.9256	0.7085	0.7905	0.8625	0.2171	0.1351	0.0631	-0.082	-0.154	0.2171	0.1351	0.0631	0.082	0.154	TRUE	FALSE	TRUE	FALSE	TRUE	TRUE	TRUE	FALSE	TRUE	FALSE	TRUE	TRUE	FALSE
RI	ENSG00000225697	SLC26A6	chr3:48665974-48665848:-@chr3:48664505-48664309:-	0.4	0.47	0.26	0.19	0.27	0.17	0.39	0.27	0.0257046	0.0430615	0.158719	0.482668	0.141379	0.4356	0.2285	0.2255	0.3375	0.2071	0.2101	0.0981	0.003	-0.109	0.2071	0.2101	0.0981	0.003	0.109	TRUE	TRUE	FALSE	FALSE	FALSE	TRUE	FALSE	FALSE	TRUE	FALSE	TRUE	FALSE	TRUE
RI	ENSG00000178149	DALRD3	chr3:49053773-49053591:-@chr3:49053519-49053406:-	0.13	0.17	0.22	0.26	0.32	0.13	0.25	0.15	0.0410685	0.27536	0.22184	0.456729	0.299486	0.1506	0.2435	0.2305	0.2075	-0.0929	-0.0799	-0.0569	0.013	0.036	0.0929	0.0799	0.0569	0.013	0.036	TRUE	FALSE	FALSE	FALSE	FALSE	TRUE	FALSE	TRUE	TRUE	TRUE	TRUE	TRUE	TRUE
RI	ENSG00000164050	PLXNB1	chr3:48461666-48461633:-@chr3:48461083-48460986:-	0.52	0.56	0.42	0.4	0.38	0.42	0.54	0.54	0.0281326	0.02076	0.392258	0.384477	0.0222555	0.5406	0.4135	0.4055	0.5475	0.1271	0.1351	-0.0069	0.008	-0.134	0.1271	0.1351	0.0069	0.008	0.134	TRUE	TRUE	FALSE	FALSE	TRUE	TRUE	TRUE	FALSE	TRUE	FALSE	TRUE	FALSE	TRUE
RI	ENSG00000164068	RNF123	chr3:49749912-49750089:+@chr3:49750946-49751020:+	0.17	0.11	0.31	0.26	0.07	0.12	0.24	0.14	0.033821	0.210662	0.22406	0.0168613	0.14202	0.1406	0.2885	0.1005	0.1975	-0.1479	0.0401	-0.0569	0.188	0.091	0.1479	0.0401	0.0569	0.188	0.091	TRUE	FALSE	FALSE	TRUE	FALSE	TRUE	TRUE	TRUE	TRUE	TRUE	TRUE	TRUE	TRUE
RI	ENSG00000170364	SETMAR	chr3:4354582-4354913:+@chr3:4355331-4355445:+	0.9	0.92	0.7	0.74	0.82	0.8	0.88	0.92	0.0179895	0.00979224	0.453964	0.0480005	0.011969	0.9106	0.7235	0.8155	0.9075	0.1871	0.0951	0.0031	-0.092	-0.184	0.1871	0.0951	0.0031	0.092	0.184	TRUE	TRUE	FALSE	TRUE	TRUE	TRUE	TRUE	FALSE	TRUE	FALSE	TRUE	FALSE	TRUE
RI	ENSG00000004534	RBM6	chr3:50098895-50098980:+@chr3:50099395-50099541:+	0.26	0.27	0.12	0.13	0.36	0.24	0.21	0.19	0.00156687	0.311873	0.0305617	0.101941	0.0164743	0.2656	0.1285	0.3055	0.2075	0.1371	-0.0399	0.0581	-0.177	-0.079	0.1371	0.0399	0.0581	0.177	0.079	TRUE	FALSE	TRUE	FALSE	TRUE	TRUE	TRUE	FALSE	TRUE	FALSE	TRUE	TRUE	FALSE
RI	ENSG00000178149	DALRD3	chr3:49053773-49053591:-@chr3:49053493-49053406:-	0.2	0.21	0.51	0.55	0.39	0.29	0.23	0.37	0.015805	0.106966	0.192248	0.0627654	0.0851655	0.2056	0.5335	0.3455	0.3075	-0.3279	-0.1399	-0.1019	0.188	0.226	0.3279	0.1399	0.1019	0.188	0.226	TRUE	FALSE	FALSE	FALSE	FALSE	TRUE	FALSE	TRUE	TRUE	TRUE	TRUE	TRUE	TRUE
RI	ENSG00000114857	NKTR	chr3:42674093-42674315:+@chr3:42675072-42675227:+	0.19	0.21	0.25	0.27	0.35	0.27	0.27	0.33	0.0241171	0.0973951	0.0757446	0.201907	0.184769	0.2006	0.2635	0.3155	0.3075	-0.0629	-0.1149	-0.1069	-0.052	-0.044	0.0629	0.1149	0.1069	0.052	0.044	TRUE	FALSE	FALSE	FALSE	FALSE	TRUE	FALSE	TRUE	TRUE	TRUE	TRUE	TRUE	TRUE
RI	ENSG00000114021	NIT2	chr3:100064429-100064522:+@chr3:100065025-100065099:+	0.55	0.57	0.44	0.42	0.59	0.5	0.47	0.62	0.00555392	0.429291	0.466042	0.10952	0.178347	0.5606	0.4335	0.5505	0.5525	0.1271	0.0101	0.0081	-0.117	-0.119	0.1271	0.0101	0.0081	0.117	0.119	TRUE	FALSE	FALSE	FALSE	FALSE	TRUE	FALSE	TRUE	TRUE	TRUE	TRUE	TRUE	TRUE
RI	ENSG00000198218	QRICH1	chr3:49070661-49070553:-@chr3:49070206-49070055:-	0.24	0.26	0.31	0.34	0.32	0.33	0.22	0.32	0.0344757	0.0166325	0.344146	0.459904	0.244998	0.2506	0.3285	0.3305	0.2775	-0.0779	-0.0799	-0.0269	-0.002	0.051	0.0779	0.0799	0.0269	0.002	0.051	TRUE	TRUE	FALSE	FALSE	FALSE	TRUE	FALSE	FALSE	TRUE	FALSE	TRUE	FALSE	TRUE
RI	ENSG00000161217	PCYT1A	chr3:195975194-195975078:-@chr3:195974514-195974238:-	0.44	0.31	0.71	0.66	0.47	0.37	0.56	0.23	0.049394	0.304389	0.449625	0.0366219	0.163689	0.3756	0.6885	0.4255	0.4025	-0.3129	-0.0499	-0.0269	0.263	0.286	0.3129	0.0499	0.0269	0.263	0.286	TRUE	FALSE	FALSE	TRUE	FALSE	TRUE	TRUE	TRUE	TRUE	TRUE	TRUE	TRUE	TRUE
RI	ENSG00000163930	BAP1	chr3:52440923-52440845:-@chr3:52440338-52440269:-	0.44	0.45	0.53	0.52	0.36	0.5	0.45	0.59	0.00299133	0.454726	0.225939	0.206126	0.495487	0.4456	0.5285	0.4355	0.5275	-0.0829	0.0101	-0.0819	0.093	0.001	0.0829	0.0101	0.0819	0.093	0.001	TRUE	FALSE	FALSE	FALSE	FALSE	TRUE	FALSE	TRUE	TRUE	TRUE	TRUE	TRUE	TRUE
RI	ENSG00000145191	EIF2B5	chr3:183860840-183861353:+@chr3:183861887-183862012:+	0.71	0.71	0.55	0.51	0.53	0.42	0.59	0.74	0.0348556	0.0740203	0.351238	0.250906	0.151377	0.7106	0.5335	0.4805	0.6725	0.1771	0.2301	0.0381	0.053	-0.139	0.1771	0.2301	0.0381	0.053	0.139	TRUE	FALSE	FALSE	FALSE	FALSE	TRUE	FALSE	TRUE	TRUE	TRUE	TRUE	TRUE	TRUE
RI	ENSG00000177463	NR2C2	chr3:15079507-15079644:+@chr3:15080629-15080734:+	0.21	0.32	0.72	0.59	0.53	0.64	0.45	0.61	0.0227733	0.0264651	0.0619462	0.254821	0.183211	0.2656	0.6585	0.5905	0.5375	-0.3929	-0.3249	-0.2719	0.068	0.121	0.3929	0.3249	0.2719	0.068	0.121	TRUE	TRUE	FALSE	FALSE	FALSE	TRUE	FALSE	FALSE	TRUE	FALSE	TRUE	FALSE	TRUE
RI	ENSG00000182378	PLCXD1	chrX:215764-216132:+@chrX:219504-220020:+	0.73	0.76	0.66	0.67	0.7	0.63	0.63	0.66	0.0436321	0.120433	0.0244233	0.481625	0.240748	0.7456	0.6685	0.6705	0.6525	0.0771	0.0751	0.0931	-0.002	0.016	0.0771	0.0751	0.0931	0.002	0.016	TRUE	FALSE	TRUE	FALSE	FALSE	TRUE	FALSE	FALSE	TRUE	FALSE	TRUE	TRUE	FALSE
RI	ENSG00000102317	RBM3	chrX:48433949-48434055:+@chrX:48434203-48434471:+	0.65	0.67	0.76	0.79	0.58	0.55	0.67	0.64	0.0177824	0.023545	0.462146	0.00520157	0.0160988	0.6606	0.7785	0.5705	0.6625	-0.1179	0.0901	-0.0019	0.208	0.116	0.1179	0.0901	0.0019	0.208	0.116	TRUE	TRUE	FALSE	TRUE	TRUE	TRUE	TRUE	FALSE	TRUE	FALSE	TRUE	FALSE	TRUE
RI	NA	NA	chrX:70315999-70316549:+@chrX:70316715-70316831:+	0.79	0.79	0.49	0.53	0.72	0.78	0.84	0.43	0.0234672	0.227704	0.300487	0.0154474	0.320745	0.7906	0.5135	0.7555	0.6425	0.2771	0.0351	0.1481	-0.242	-0.129	0.2771	0.0351	0.1481	0.242	0.129	TRUE	FALSE	FALSE	TRUE	FALSE	TRUE	TRUE	TRUE	TRUE	TRUE	TRUE	TRUE	TRUE
RI	ENSG00000068308	OTUD5	chrX:48792140-48791969:-@chrX:48791885-48791737:-	0.6	0.58	0.36	0.41	0.73	0.56	0.49	0.48	0.0247297	0.303427	0.0186287	0.087576	0.0719903	0.5906	0.3885	0.6505	0.4925	0.2021	-0.0599	0.0981	-0.262	-0.104	0.2021	0.0599	0.0981	0.262	0.104	TRUE	FALSE	TRUE	FALSE	FALSE	TRUE	FALSE	FALSE	TRUE	FALSE	TRUE	TRUE	FALSE
RI	ENSG00000164117	FBXO8	chr4:175184251-175184070:-@chr4:175183946-175183915:-	0.9	0.9	0.83	0.81	0.69	0.8	0.86	0.7	0.038795	0.112726	0.19502	0.204628	0.364671	0.9006	0.8235	0.7505	0.7875	0.0771	0.1501	0.1131	0.073	0.036	0.0771	0.1501	0.1131	0.073	0.036	TRUE	FALSE	FALSE	FALSE	FALSE	TRUE	FALSE	TRUE	TRUE	TRUE	TRUE	TRUE	TRUE
RI	ENSG00000109171	SLAIN2	chr4:48384585-48384656:+@chr4:48384745-48384944:+	0.93	0.94	0.86	0.88	0.82	0.93	0.91	0.93	0.0344251	0.250803	0.290232	0.460231	0.0339977	0.9356	0.8735	0.8805	0.9275	0.0621	0.0551	0.0081	-0.007	-0.054	0.0621	0.0551	0.0081	0.007	0.054	TRUE	FALSE	FALSE	FALSE	TRUE	TRUE	TRUE	TRUE	TRUE	TRUE	TRUE	TRUE	TRUE
RI	NA	NA	chr4:119199917-119199947:+@chr4:119200099-119200292:+	0.3	0.28	0.4	0.41	0.34	0.38	0.37	0.32	0.0113902	0.060551	0.101717	0.133348	0.124906	0.2906	0.4085	0.3655	0.3525	-0.1179	-0.0749	-0.0619	0.043	0.056	0.1179	0.0749	0.0619	0.043	0.056	TRUE	FALSE	FALSE	FALSE	FALSE	TRUE	FALSE	TRUE	TRUE	TRUE	TRUE	TRUE	TRUE
RI	ENSG00000137601	NEK1	chr4:170533778-170533373:-@chr4:170533294-170533171:-	0.21	0.26	0.42	0.39	0.47	0.37	0.28	0.42	0.021085	0.0572012	0.156378	0.395452	0.299956	0.2356	0.4085	0.4255	0.3575	-0.1729	-0.1899	-0.1219	-0.017	0.051	0.1729	0.1899	0.1219	0.017	0.051	TRUE	FALSE	FALSE	FALSE	FALSE	TRUE	FALSE	TRUE	TRUE	TRUE	TRUE	TRUE	TRUE
RI	ENSG00000197114	ZGPAT	chr20:62364939-62365091:+@chr20:62365997-62366176:+	0.68	0.68	0.61	0.6	0.84	0.71	0.61	0.49	0.019125	0.182486	0.143309	0.113483	0.274232	0.6806	0.6085	0.7805	0.5575	0.0721	-0.0999	0.1231	-0.172	0.051	0.0721	0.0999	0.1231	0.172	0.051	TRUE	FALSE	FALSE	FALSE	FALSE	TRUE	FALSE	TRUE	TRUE	TRUE	TRUE	TRUE	TRUE
RI	ENSG00000101194	SLC17A9	chr20:61593976-61594106:+@chr20:61594625-61594721:+	0.6	0.69	0.43	0.4	0.47	0.32	0.52	0.28	0.0488652	0.0660741	0.134839	0.424807	0.470831	0.6456	0.4185	0.4005	0.4075	0.2271	0.2451	0.2381	0.018	0.011	0.2271	0.2451	0.2381	0.018	0.011	TRUE	FALSE	FALSE	FALSE	FALSE	TRUE	FALSE	TRUE	TRUE	TRUE	TRUE	TRUE	TRUE
RI	ENSG00000124222	STX16	chr20:57226328-57226470:+@chr20:57227129-57227143:+	0.6	0.61	0.52	0.5	0.59	0.61	0.6	0.54	0.0159355	0.497067	0.256691	0.0117265	0.126131	0.6056	0.5135	0.6055	0.5775	0.0921	0.0001	0.0281	-0.092	-0.064	0.0921	0.0001	0.0281	0.092	0.064	TRUE	FALSE	FALSE	TRUE	FALSE	TRUE	TRUE	TRUE	TRUE	TRUE	TRUE	TRUE	TRUE
RI	ENSG00000179532,ENSG00000265264	DNHD1,CTD-2010I16.2	chr11:6518815-6518897:+@chr11:6519953-6520191:+	0.68	0.71	0.78	0.76	0.66	0.79	0.73	0.76	0.0305238	0.344146	0.0582899	0.314812	0.193807	0.6956	0.7735	0.7305	0.7525	-0.0779	-0.0349	-0.0569	0.043	0.021	0.0779	0.0349	0.0569	0.043	0.021	TRUE	FALSE	FALSE	FALSE	FALSE	TRUE	FALSE	TRUE	TRUE	TRUE	TRUE	TRUE	TRUE
RI	ENSG00000162241	SLC25A45	chr11:65144146-65144007:-@chr11:65143367-65142663:-	0.53	0.49	0.77	0.72	0.8	0.8	0.65	0.49	0.00955471	0.0219255	0.27571	0.129159	0.127988	0.5106	0.7485	0.8055	0.5775	-0.2379	-0.2949	-0.0669	-0.057	0.171	0.2379	0.2949	0.0669	0.057	0.171	TRUE	TRUE	FALSE	FALSE	FALSE	TRUE	FALSE	FALSE	TRUE	FALSE	TRUE	FALSE	TRUE
RI	ENSG00000177685	EFCAB4A	chr11:830621-830713:+@chr11:831224-831295:+	0.54	0.55	0.45	0.42	0.48	0.71	0.5	0.63	0.0319345	0.35876	0.375972	0.195754	0.138906	0.5456	0.4385	0.6005	0.5725	0.1071	-0.0549	-0.0269	-0.162	-0.134	0.1071	0.0549	0.0269	0.162	0.134	TRUE	FALSE	FALSE	FALSE	FALSE	TRUE	FALSE	TRUE	TRUE	TRUE	TRUE	TRUE	TRUE
RI	ENSG00000184154	LRTOMT	chr11:71805994-71806142:+@chr11:71806425-71807938:+	0.42	0.47	0.28	0.32	0.47	0.34	0.31	0.23	0.0250202	0.342303	0.0445055	0.163886	0.31729	0.4456	0.3035	0.4105	0.2775	0.1421	0.0351	0.1681	-0.107	0.026	0.1421	0.0351	0.1681	0.107	0.026	TRUE	FALSE	TRUE	FALSE	FALSE	TRUE	FALSE	FALSE	TRUE	FALSE	TRUE	TRUE	FALSE
RI	ENSG00000149273	RPS3	chr11:75112684-75112749:+@chr11:75113424-75113490:+	0.4	0.39	0.6	0.63	0.57	0.44	0.49	0.52	0.0133521	0.162	0.0294881	0.165709	0.0201015	0.3956	0.6185	0.5105	0.5125	-0.2229	-0.1149	-0.1169	0.108	0.106	0.2229	0.1149	0.1169	0.108	0.106	TRUE	FALSE	TRUE	FALSE	TRUE	TRUE	TRUE	FALSE	TRUE	FALSE	TRUE	TRUE	FALSE
RI	ENSG00000168066	SF1	chr11:64533627-64533423:-@chr11:64532990-64532078:-	0.71	0.72	0.65	0.67	0.63	0.65	0.68	0.67	0.0433956	0.029295	0.0179081	0.174604	0.14643	0.7156	0.6635	0.6455	0.6825	0.0521	0.0701	0.0331	0.018	-0.019	0.0521	0.0701	0.0331	0.018	0.019	TRUE	TRUE	FALSE	FALSE	FALSE	TRUE	FALSE	FALSE	TRUE	FALSE	TRUE	FALSE	TRUE
RI	ENSG00000151500	THYN1	chr11:134123260-134123193:-@chr11:134122810-134122734:-	0.58	0.61	0.42	0.37	0.41	0.45	0.47	0.57	0.0168572	0.0152163	0.197344	0.184766	0.0974085	0.5956	0.3985	0.4355	0.5275	0.1971	0.1601	0.0681	-0.037	-0.129	0.1971	0.1601	0.0681	0.037	0.129	TRUE	TRUE	FALSE	FALSE	FALSE	TRUE	FALSE	FALSE	TRUE	FALSE	TRUE	FALSE	TRUE
RI	ENSG00000166333	ILK	chr11:6629924-6630020:+@chr11:6630115-6630198:+	0.08	0.09	0.37	0.38	0.34	0.21	0.34	0.31	0.000360542	0.100958	0.0118228	0.184558	0.0804152	0.0856	0.3785	0.2805	0.3325	-0.2929	-0.1949	-0.2469	0.098	0.046	0.2929	0.1949	0.2469	0.098	0.046	TRUE	FALSE	TRUE	FALSE	FALSE	TRUE	FALSE	FALSE	TRUE	FALSE	TRUE	TRUE	FALSE
RI	NA	NA	chr11:64533627-64533423:-@chr11:64532990-64532076:-	0.71	0.73	0.65	0.67	0.63	0.66	0.68	0.68	0.0287969	0.0406248	0.0894346	0.283847	0.130958	0.7206	0.6635	0.6505	0.6875	0.0571	0.0701	0.0331	0.013	-0.024	0.0571	0.0701	0.0331	0.013	0.024	TRUE	TRUE	FALSE	FALSE	FALSE	TRUE	FALSE	FALSE	TRUE	FALSE	TRUE	FALSE	TRUE
RI	ENSG00000107897	ACBD5	chr10:27529808-27529603:-@chr10:27529413-27529248:-	0.45	0.44	0.52	0.54	0.46	0.39	0.52	0.29	0.0184613	0.368744	0.410437	0.0910649	0.240735	0.4456	0.5335	0.4305	0.4125	-0.0879	0.0151	0.0331	0.103	0.121	0.0879	0.0151	0.0331	0.103	0.121	TRUE	FALSE	FALSE	FALSE	FALSE	TRUE	FALSE	TRUE	TRUE	TRUE	TRUE	TRUE	TRUE
RI	ENSG00000173145	NOC3L	chr10:96117972-96117840:-@chr10:96117088-96116931:-	0.18	0.17	0.09	0.11	0.39	0.18	0.17	0.12	0.0246554	0.234754	0.257533	0.161028	0.131808	0.1756	0.1035	0.2905	0.1525	0.0721	-0.1149	0.0231	-0.187	-0.049	0.0721	0.1149	0.0231	0.187	0.049	TRUE	FALSE	FALSE	FALSE	FALSE	TRUE	FALSE	TRUE	TRUE	TRUE	TRUE	TRUE	TRUE
RI	ENSG00000120549	KIAA1217	chr10:24833910-24834032:+@chr10:24834756-24836772:+	0.51	0.54	0.38	0.38	0.47	0.46	0.41	0.47	0.0324499	0.0701449	0.0974147	0.015462	0.141524	0.5256	0.3835	0.4705	0.4475	0.1421	0.0551	0.0781	-0.087	-0.064	0.1421	0.0551	0.0781	0.087	0.064	TRUE	FALSE	FALSE	TRUE	FALSE	TRUE	TRUE	TRUE	TRUE	TRUE	TRUE	TRUE	TRUE
RI	ENSG00000148719	DNAJB12	chr10:74095689-74095592:-@chr10:74094375-74092588:-	0.31	0.28	0.44	0.49	0.22	0.33	0.38	0.46	0.0218585	0.4161	0.0779242	0.0695609	0.248005	0.2956	0.4685	0.2805	0.4275	-0.1729	0.0151	-0.1319	0.188	0.041	0.1729	0.0151	0.1319	0.188	0.041	TRUE	FALSE	FALSE	FALSE	FALSE	TRUE	FALSE	TRUE	TRUE	TRUE	TRUE	TRUE	TRUE
RI	ENSG00000148719	DNAJB12	chr10:74095689-74095538:-@chr10:74094375-74092588:-	0.31	0.28	0.43	0.5	0.21	0.34	0.39	0.48	0.0447164	0.428291	0.0814279	0.0818173	0.349372	0.2956	0.4685	0.2805	0.4425	-0.1729	0.0151	-0.1469	0.188	0.026	0.1729	0.0151	0.1469	0.188	0.026	TRUE	FALSE	FALSE	FALSE	FALSE	TRUE	FALSE	TRUE	TRUE	TRUE	TRUE	TRUE	TRUE
RI	ENSG00000143774	GUK1	chr1:228333212-228333325:+@chr1:228333714-228333768:+	0.46	0.52	0.66	0.62	0.49	0.53	0.47	0.53	0.031969	0.284136	0.36468	0.0228792	0.040958	0.4906	0.6435	0.5155	0.5075	-0.1529	-0.0249	-0.0169	0.128	0.136	0.1529	0.0249	0.0169	0.128	0.136	TRUE	FALSE	FALSE	TRUE	TRUE	TRUE	TRUE	TRUE	TRUE	TRUE	TRUE	TRUE	TRUE
RI	ENSG00000158286	RNF207	chr1:6272742-6272793:+@chr1:6273126-6273243:+	0.59	0.59	0.53	0.53	0.64	0.55	0.53	0.49	8.95831e-05	0.43032	0.0829139	0.186605	0.28126	0.5906	0.5335	0.6005	0.5175	0.0571	-0.0099	0.0731	-0.067	0.016	0.0571	0.0099	0.0731	0.067	0.016	TRUE	FALSE	FALSE	FALSE	FALSE	TRUE	FALSE	TRUE	TRUE	TRUE	TRUE	TRUE	TRUE
RI	ENSG00000198198	SZT2	chr1:43893201-43893405:+@chr1:43893674-43893789:+	0.07	0.04	0.22	0.23	0.09	0.07	0.26	0.25	0.0177446	0.132166	0.0166397	0.00644313	0.0220988	0.0556	0.2285	0.0855	0.2625	-0.1729	-0.0299	-0.2069	0.143	-0.034	0.1729	0.0299	0.2069	0.143	0.034	TRUE	FALSE	TRUE	TRUE	FALSE	TRUE	TRUE	FALSE	TRUE	FALSE	TRUE	TRUE	FALSE
RI	NA	NA	chr1:150266269-150266318:+@chr1:150266755-150266869:+	0.64	0.71	0.54	0.48	0.61	0.73	0.67	0.56	0.0365272	0.499507	0.255193	0.0918178	0.128277	0.6756	0.5135	0.6755	0.6225	0.1621	0.0001	0.0531	-0.162	-0.109	0.1621	0.0001	0.0531	0.162	0.109	TRUE	FALSE	FALSE	FALSE	FALSE	TRUE	FALSE	TRUE	TRUE	TRUE	TRUE	TRUE	TRUE
RI	ENSG00000126107	HECTD3	chr1:45471788-45471669:-@chr1:45471555-45471466:-	0.59	0.62	0.42	0.37	0.36	0.27	0.24	0.41	0.0155789	0.037127	0.0923208	0.148642	0.289454	0.6056	0.3985	0.3205	0.3325	0.2071	0.2851	0.2731	0.078	0.066	0.2071	0.2851	0.2731	0.078	0.066	TRUE	TRUE	FALSE	FALSE	FALSE	TRUE	FALSE	FALSE	TRUE	FALSE	TRUE	FALSE	TRUE
RI	ENSG00000162576	MXRA8	chr1:1289889-1289734:-@chr1:1289612-1289573:-	0.73	0.72	0.66	0.67	0.7	0.69	0.69	0.61	0.00887736	0.0368143	0.165234	0.0246558	0.413673	0.7256	0.6685	0.7005	0.6575	0.0571	0.0251	0.0681	-0.032	0.011	0.0571	0.0251	0.0681	0.032	0.011	TRUE	FALSE	FALSE	FALSE	FALSE	TRUE	FALSE	TRUE	TRUE	TRUE	TRUE	TRUE	TRUE
RI	ENSG00000159348	CYB5R1	chr1:202935728-202935656:-@chr1:202935237-202935015:-	0.73	0.68	0.57	0.62	0.6	0.54	0.56	0.27	0.0484072	0.0407227	0.146525	0.308076	0.216676	0.7056	0.5985	0.5755	0.4225	0.1071	0.1301	0.2831	0.023	0.176	0.1071	0.1301	0.2831	0.023	0.176	TRUE	TRUE	FALSE	FALSE	FALSE	TRUE	FALSE	FALSE	TRUE	FALSE	TRUE	FALSE	TRUE
RI	ENSG00000162576	MXRA8	chr1:1289009-1288456:-@chr1:1288352-1288072:-	0.99	0.97	0.92	0.93	0.95	0.94	0.95	0.95	0.0381131	0.0862248	0.134338	0.0474248	0.058448	0.9806	0.9285	0.9505	0.9575	0.0521	0.0301	0.0231	-0.022	-0.029	0.0521	0.0301	0.0231	0.022	0.029	TRUE	FALSE	FALSE	FALSE	FALSE	TRUE	FALSE	TRUE	TRUE	TRUE	TRUE	TRUE	TRUE
RI	ENSG00000137955	RABGGTB	chr1:76255637-76255742:+@chr1:76255837-76255959:+	0.94	0.94	0.87	0.86	0.82	0.87	0.96	0.82	0.019125	0.0877535	0.323306	0.303838	0.374181	0.9406	0.8685	0.8505	0.8975	0.0721	0.0901	0.0431	0.018	-0.029	0.0721	0.0901	0.0431	0.018	0.029	TRUE	FALSE	FALSE	FALSE	FALSE	TRUE	FALSE	TRUE	TRUE	TRUE	TRUE	TRUE	TRUE
RI	ENSG00000143702	CEP170	chr1:243349724-243349561:-@chr1:243349374-243349081:-	0.16	0.21	0.3	0.26	0.19	0.24	0.25	0.27	0.0475676	0.214292	0.0730195	0.098681	0.282001	0.1856	0.2835	0.2205	0.2675	-0.0979	-0.0349	-0.0819	0.063	0.016	0.0979	0.0349	0.0819	0.063	0.016	TRUE	FALSE	FALSE	FALSE	FALSE	TRUE	FALSE	TRUE	TRUE	TRUE	TRUE	TRUE	TRUE
RI	ENSG00000160051	IQCC	chr1:32671755-32671898:+@chr1:32672110-32672362:+	0.33	0.27	0.2	0.14	0.29	0.17	0.22	0.19	0.0477729	0.230647	0.0836912	0.239181	0.196822	0.3006	0.1735	0.2355	0.2125	0.1271	0.0651	0.0881	-0.062	-0.039	0.1271	0.0651	0.0881	0.062	0.039	TRUE	FALSE	FALSE	FALSE	FALSE	TRUE	FALSE	TRUE	TRUE	TRUE	TRUE	TRUE	TRUE
RI	ENSG00000163472	TMEM79	chr1:156254975-156255058:+@chr1:156255316-156255774:+	0.91	0.89	0.72	0.75	0.76	0.83	0.82	0.86	0.00964642	0.0975351	0.0948065	0.151564	0.0290572	0.9006	0.7385	0.8005	0.8475	0.1621	0.1001	0.0531	-0.062	-0.109	0.1621	0.1001	0.0531	0.062	0.109	TRUE	FALSE	FALSE	FALSE	TRUE	TRUE	TRUE	TRUE	TRUE	TRUE	TRUE	TRUE	TRUE
RI	ENSG00000143774	GUK1	chr1:228335107-228335239:+@chr1:228335369-228335400:+	0.49	0.54	0.64	0.61	0.63	0.58	0.51	0.55	0.0407048	0.0559187	0.283317	0.30226	0.0399264	0.5156	0.6285	0.6105	0.5375	-0.1129	-0.0949	-0.0219	0.018	0.091	0.1129	0.0949	0.0219	0.018	0.091	TRUE	FALSE	FALSE	FALSE	TRUE	TRUE	TRUE	TRUE	TRUE	TRUE	TRUE	TRUE	TRUE
RI	ENSG00000084072	PPIE	chr1:40207567-40207703:+@chr1:40208888-40208969:+	0.68	0.65	0.49	0.49	0.58	0.52	0.54	0.64	0.0282895	0.0581123	0.196878	0.141325	0.143877	0.6656	0.4935	0.5555	0.5975	0.1721	0.1101	0.0681	-0.062	-0.104	0.1721	0.1101	0.0681	0.062	0.104	TRUE	FALSE	FALSE	FALSE	FALSE	TRUE	FALSE	TRUE	TRUE	TRUE	TRUE	TRUE	TRUE
RI	ENSG00000011021	CLCN6	chr1:11900376-11900578:+@chr1:11901112-11901264:+	0.94	0.94	0.89	0.88	0.88	0.89	0.91	0.87	0.0265701	0.0341588	0.135185	0.402866	0.362557	0.9406	0.8885	0.8905	0.8975	0.0521	0.0501	0.0431	-0.002	-0.009	0.0521	0.0501	0.0431	0.002	0.009	TRUE	TRUE	FALSE	FALSE	FALSE	TRUE	FALSE	FALSE	TRUE	FALSE	TRUE	FALSE	TRUE
RI	ENSG00000122435	TRMT13	chr1:100605964-100606070:+@chr1:100606408-100606575:+	0.38	0.4	0.17	0.19	0.25	0.1	0.09	0.18	0.00241984	0.106039	0.0517183	0.48722	0.264813	0.3906	0.1835	0.1805	0.1425	0.2071	0.2101	0.2481	0.003	0.041	0.2071	0.2101	0.2481	0.003	0.041	TRUE	FALSE	FALSE	FALSE	FALSE	TRUE	FALSE	TRUE	TRUE	TRUE	TRUE	TRUE	TRUE
RI	ENSG00000234741	GAS5	chr1:173834420-173834367:-@chr1:173833842-173833395:-	0.58	0.54	0.47	0.43	0.53	0.5	0.48	0.46	0.0315738	0.131627	0.0544399	0.0600537	0.209441	0.5606	0.4535	0.5205	0.4775	0.1071	0.0401	0.0831	-0.067	-0.024	0.1071	0.0401	0.0831	0.067	0.024	TRUE	FALSE	FALSE	FALSE	FALSE	TRUE	FALSE	TRUE	TRUE	TRUE	TRUE	TRUE	TRUE
RI	ENSG00000198830	HMGN2	chr1:26800194-26800223:+@chr1:26800576-26800626:+	0.5	0.46	0.65	0.6	0.57	0.49	0.56	0.48	0.0230978	0.188028	0.216022	0.103963	0.0932156	0.4806	0.6285	0.5355	0.5275	-0.1479	-0.0549	-0.0469	0.093	0.101	0.1479	0.0549	0.0469	0.093	0.101	TRUE	FALSE	FALSE	FALSE	FALSE	TRUE	FALSE	TRUE	TRUE	TRUE	TRUE	TRUE	TRUE
RI	ENSG00000160404	TOR2A	chr9:130495839-130495664:-@chr9:130494557-130493803:-	0.22	0.22	0.17	0.16	0.15	0.17	0.2	0.17	0.0265701	0.0597232	0.151539	0.41357	0.164534	0.2206	0.1685	0.1655	0.1925	0.0521	0.0551	0.0281	0.003	-0.024	0.0521	0.0551	0.0281	0.003	0.024	TRUE	FALSE	FALSE	FALSE	FALSE	TRUE	FALSE	TRUE	TRUE	TRUE	TRUE	TRUE	TRUE
RI	ENSG00000196642	C9orf86	chr9:139726173-139726313:+@chr9:139726717-139726822:+	0.07	0.08	0.14	0.13	0.09	0.06	0.13	0.1	0.00516071	0.397218	0.0826418	0.0655715	0.230033	0.0756	0.1385	0.0805	0.1225	-0.0629	-0.0049	-0.0469	0.058	0.016	0.0629	0.0049	0.0469	0.058	0.016	TRUE	FALSE	FALSE	FALSE	FALSE	TRUE	FALSE	TRUE	TRUE	TRUE	TRUE	TRUE	TRUE
RI	ENSG00000213930,ENSG00000258728	GALT,RP11-195F19.29	chr9:34647086-34647255:+@chr9:34648112-34648168:+	0.51	0.49	0.59	0.61	0.52	0.64	0.54	0.58	0.0100075	0.19455	0.0704257	0.408156	0.148821	0.5006	0.6035	0.5855	0.5675	-0.1029	-0.0849	-0.0669	0.018	0.036	0.1029	0.0849	0.0669	0.018	0.036	TRUE	FALSE	FALSE	FALSE	FALSE	TRUE	FALSE	TRUE	TRUE	TRUE	TRUE	TRUE	TRUE
RI	ENSG00000213930,ENSG00000258728	GALT,RP11-195F19.29	chr9:34647489-34647702:+@chr9:34647829-34647958:+	0.81	0.87	0.56	0.61	0.69	0.82	0.61	0.6	0.0122337	0.210631	0.0381673	0.0992672	0.258382	0.8406	0.5885	0.7605	0.6125	0.2521	0.0801	0.2281	-0.172	-0.024	0.2521	0.0801	0.2281	0.172	0.024	TRUE	FALSE	TRUE	FALSE	FALSE	TRUE	FALSE	FALSE	TRUE	FALSE	TRUE	TRUE	FALSE
RI	ENSG00000083123	BCKDHB	chr6:81053381-81053529:+@chr6:81055692-81055987:+	0.43	0.42	0.24	0.21	0.27	0.33	0.32	0.23	0.013437	0.0745773	0.0937553	0.0992535	0.213766	0.4256	0.2285	0.3055	0.2825	0.1971	0.1201	0.1431	-0.077	-0.054	0.1971	0.1201	0.1431	0.077	0.054	TRUE	FALSE	FALSE	FALSE	FALSE	TRUE	FALSE	TRUE	TRUE	TRUE	TRUE	TRUE	TRUE
RI	ENSG00000137274	BPHL	chr6:3138275-3138413:+@chr6:3140620-3140743:+	0.77	0.79	0.67	0.64	0.72	0.62	0.7	0.73	0.0141455	0.135424	0.0540514	0.395452	0.0475702	0.7806	0.6585	0.6755	0.7225	0.1221	0.1051	0.0581	-0.017	-0.064	0.1221	0.1051	0.0581	0.017	0.064	TRUE	FALSE	FALSE	FALSE	TRUE	TRUE	TRUE	TRUE	TRUE	TRUE	TRUE	TRUE	TRUE
RI	ENSG00000197062	RP5-874C20.3	chr6:28239632-28240116:+@chr6:28240447-28240564:+	0.59	0.57	0.81	0.75	0.21	0.54	0.78	0.61	0.032755	0.219673	0.191544	0.119739	0.253407	0.5806	0.7835	0.3805	0.7025	-0.2029	0.2001	-0.1219	0.403	0.081	0.2029	0.2001	0.1219	0.403	0.081	TRUE	FALSE	FALSE	FALSE	FALSE	TRUE	FALSE	TRUE	TRUE	TRUE	TRUE	TRUE	TRUE
RI	ENSG00000083123	BCKDHB	chr6:81053381-81053529:+@chr6:81055692-81055971:+	0.42	0.4	0.23	0.2	0.27	0.31	0.3	0.23	0.0059212	0.033299	0.0660953	0.0522675	0.169358	0.4106	0.2185	0.2955	0.2725	0.1921	0.1151	0.1381	-0.077	-0.054	0.1921	0.1151	0.1381	0.077	0.054	TRUE	TRUE	FALSE	FALSE	FALSE	TRUE	FALSE	FALSE	TRUE	FALSE	TRUE	FALSE	TRUE
RI	ENSG00000132424	PNISR	chr6:99864304-99864225:-@chr6:99862562-99862448:-	0.61	0.6	0.54	0.56	0.64	0.28	0.59	0.41	0.0393271	0.289018	0.235191	0.354902	0.348846	0.6056	0.5535	0.4655	0.5075	0.0521	0.1401	0.0981	0.088	0.046	0.0521	0.1401	0.0981	0.088	0.046	TRUE	FALSE	FALSE	FALSE	FALSE	TRUE	FALSE	TRUE	TRUE	TRUE	TRUE	TRUE	TRUE
RI	NA	NA	chr6:52531187-52531316:+@chr6:52531547-52533951:+	0.4	0.42	0.73	0.73	0.6	0.48	0.6	0.71	0.00930446	0.12878	0.0647037	0.0975559	0.211184	0.4106	0.7335	0.5455	0.6625	-0.3229	-0.1349	-0.2519	0.188	0.071	0.3229	0.1349	0.2519	0.188	0.071	TRUE	FALSE	FALSE	FALSE	FALSE	TRUE	FALSE	TRUE	TRUE	TRUE	TRUE	TRUE	TRUE
RI	ENSG00000243649,ENSG00000244255	CFB,XXbac-BPG116M5.17	chr6:31915722-31915858:+@chr6:31916151-31916289:+	0.36	0.25	0.1	0.02	0.13	0.07	0.16	0.13	0.040896	0.0602981	0.101522	0.245076	0.118838	0.3056	0.0635	0.1055	0.1525	0.2421	0.2001	0.1531	-0.042	-0.089	0.2421	0.2001	0.1531	0.042	0.089	TRUE	FALSE	FALSE	FALSE	FALSE	TRUE	FALSE	TRUE	TRUE	TRUE	TRUE	TRUE	TRUE
RI	ENSG00000204348	DOM3Z	chr6:31938924-31938689:-@chr6:31938529-31938383:-	0.59	0.56	0.72	0.69	0.63	0.56	0.74	0.53	0.0123121	0.301167	0.318489	0.0791295	0.320478	0.5756	0.7085	0.6005	0.6425	-0.1329	-0.0249	-0.0669	0.108	0.066	0.1329	0.0249	0.0669	0.108	0.066	TRUE	FALSE	FALSE	FALSE	FALSE	TRUE	FALSE	TRUE	TRUE	TRUE	TRUE	TRUE	TRUE
RI	ENSG00000137312	FLOT1	chr6:30709481-30709439:-@chr6:30709110-30708967:-	0.73	0.72	0.63	0.62	0.72	0.61	0.64	0.69	0.00294719	0.247746	0.137076	0.290824	0.163836	0.7256	0.6285	0.6705	0.6725	0.0971	0.0551	0.0531	-0.042	-0.044	0.0971	0.0551	0.0531	0.042	0.044	TRUE	FALSE	FALSE	FALSE	FALSE	TRUE	FALSE	TRUE	TRUE	TRUE	TRUE	TRUE	TRUE
RI	ENSG00000206503	HLA-A	chr6:29910534-29910631:+@chr6:29911062-29911320:+	0.42	0.43	0.48	0.48	0.4	0.36	0.48	0.47	0.0240241	0.137542	0.00628439	0.0624216	0.430471	0.4256	0.4835	0.3855	0.4825	-0.0579	0.0401	-0.0569	0.098	0.001	0.0579	0.0401	0.0569	0.098	0.001	TRUE	FALSE	TRUE	FALSE	FALSE	TRUE	FALSE	FALSE	TRUE	FALSE	TRUE	TRUE	FALSE
RI	ENSG00000137203	TFAP2A	chr6:10410568-10410515:-@chr6:10410371-10410134:-	0.46	0.37	0.59	0.64	0.39	0.39	0.58	0.51	0.0434345	0.367331	0.0736479	0.0361929	0.137003	0.4156	0.6185	0.3955	0.5525	-0.2029	0.0201	-0.1369	0.223	0.066	0.2029	0.0201	0.1369	0.223	0.066	TRUE	FALSE	FALSE	TRUE	FALSE	TRUE	TRUE	TRUE	TRUE	TRUE	TRUE	TRUE	TRUE
RI	ENSG00000111877	MCM9	chr6:119234585-119234460:-@chr6:119232934-119231762:-	0.04	0.03	0.1	0.12	0.11	0.17	0.13	0.05	0.0220285	0.0815769	0.178913	0.238085	0.377981	0.0356	0.1135	0.1455	0.0975	-0.0779	-0.1099	-0.0619	-0.032	0.016	0.0779	0.1099	0.0619	0.032	0.016	TRUE	FALSE	FALSE	FALSE	FALSE	TRUE	FALSE	TRUE	TRUE	TRUE	TRUE	TRUE	TRUE
RI	ENSG00000134884	ARGLU1	chr13:107212005-107211780:-@chr13:107209479-107209396:-	0.35	0.35	0.26	0.26	0.32	0.24	0.31	0.24	4.00281e-05	0.173587	0.149245	0.338243	0.339762	0.3506	0.2635	0.2855	0.2825	0.0871	0.0651	0.0681	-0.022	-0.019	0.0871	0.0651	0.0681	0.022	0.019	TRUE	FALSE	FALSE	FALSE	FALSE	TRUE	FALSE	TRUE	TRUE	TRUE	TRUE	TRUE	TRUE
RI	ENSG00000131187	F12	chr5:176831091-176830860:-@chr5:176830618-176830482:-	0.42	0.5	0.74	0.71	0.31	0.48	0.42	0.4	0.032658	0.305681	0.23362	0.0769344	0.00289902	0.4606	0.7285	0.4005	0.4175	-0.2679	0.0601	0.0431	0.328	0.311	0.2679	0.0601	0.0431	0.328	0.311	TRUE	FALSE	FALSE	FALSE	TRUE	TRUE	TRUE	TRUE	TRUE	TRUE	TRUE	TRUE	TRUE
RI	ENSG00000176783	RUFY1	chr5:178986732-178986836:+@chr5:178987026-178987199:+	0.43	0.32	0.78	0.62	0.53	0.46	0.79	0.64	0.0451265	0.109923	0.0365448	0.0999687	0.438838	0.3756	0.7035	0.5005	0.7225	-0.3279	-0.1249	-0.3469	0.203	-0.019	0.3279	0.1249	0.3469	0.203	0.019	TRUE	FALSE	TRUE	FALSE	FALSE	TRUE	FALSE	FALSE	TRUE	FALSE	TRUE	TRUE	FALSE
RI	ENSG00000169045	HNRNPH1	chr5:179048398-179048243:-@chr5:179048036-179047893:-	0.56	0.56	0.45	0.42	0.36	0.33	0.42	0.31	0.0375275	0.0218589	0.0897605	0.0251215	0.215487	0.5606	0.4385	0.3505	0.3725	0.1221	0.2101	0.1881	0.088	0.066	0.1221	0.2101	0.1881	0.088	0.066	TRUE	TRUE	FALSE	TRUE	FALSE	TRUE	TRUE	FALSE	TRUE	FALSE	TRUE	FALSE	TRUE
RI	ENSG00000164609	SLU7	chr5:159846088-159846030:-@chr5:159845692-159845603:-	0.62	0.58	0.43	0.49	0.48	0.57	0.62	0.59	0.0397541	0.171255	0.34286	0.180374	0.0421946	0.6006	0.4635	0.5305	0.6125	0.1371	0.0701	-0.0119	-0.067	-0.149	0.1371	0.0701	0.0119	0.067	0.149	TRUE	FALSE	FALSE	FALSE	TRUE	TRUE	TRUE	TRUE	TRUE	TRUE	TRUE	TRUE	TRUE
RI	ENSG00000079134	THOC1	chr18:225403-225337:-@chr18:225139-225089:-	0.37	0.47	0.67	0.61	0.28	0.45	0.59	0.57	0.0418261	0.336585	0.0866466	0.0820233	0.144068	0.4206	0.6435	0.3705	0.5875	-0.2229	0.0501	-0.1669	0.273	0.056	0.2229	0.0501	0.1669	0.273	0.056	TRUE	FALSE	FALSE	FALSE	FALSE	TRUE	FALSE	TRUE	TRUE	TRUE	TRUE	TRUE	TRUE
A3	ENSG00000197375	SLC22A5	chr5:131724613:131724713:+@chr5:131726382|131726468:131726596:+	0.79	0.77	0.86	0.84	0.83	0.81	0.88	0.87	0.0179857	0.0434145	0.0177002	0.0862621	0.0785546	0.7806	0.8535	0.8255	0.8825	-0.0729	-0.0449	-0.1019	0.028	-0.029	0.0729	0.0449	0.1019	0.028	0.029	TRUE	FALSE	TRUE	FALSE	FALSE	TRUE	FALSE	FALSE	TRUE	FALSE	TRUE	TRUE	FALSE
A3	ENSG00000215068	AC025171.1	chr5:43043574:43043669:+@chr5:43044545|43044801:43045370:+	0.55	0.46	0.75	0.84	0.72	0.62	0.61	0.62	0.0224682	0.0640356	0.115815	0.104864	0.078317	0.5056	0.7985	0.6755	0.6225	-0.2929	-0.1699	-0.1169	0.123	0.176	0.2929	0.1699	0.1169	0.123	0.176	TRUE	FALSE	FALSE	FALSE	FALSE	TRUE	FALSE	TRUE	TRUE	TRUE	TRUE	TRUE	TRUE
A3	ENSG00000038274	MAT2B	chr5:162932585:162932755:+@chr5:162939008|162940561:162940675:+	0.9	0.88	0.81	0.81	0.81	0.87	0.87	0.89	0.0423698	0.180906	0.426642	0.242346	0.0445569	0.8906	0.8135	0.8455	0.8875	0.0771	0.0451	0.0031	-0.032	-0.074	0.0771	0.0451	0.0031	0.032	0.074	TRUE	FALSE	FALSE	FALSE	TRUE	TRUE	TRUE	TRUE	TRUE	TRUE	TRUE	TRUE	TRUE
A3	ENSG00000196923	PDLIM7	chr5:176917871:176917907:-@chr5:176916833|176917594:176916772:-	0.5	0.56	0.41	0.34	0.62	0.37	0.49	0.7	0.0406963	0.424923	0.308925	0.250427	0.128651	0.5306	0.3785	0.5005	0.6025	0.1521	0.0301	-0.0719	-0.122	-0.224	0.1521	0.0301	0.0719	0.122	0.224	TRUE	FALSE	FALSE	FALSE	FALSE	TRUE	FALSE	TRUE	TRUE	TRUE	TRUE	TRUE	TRUE
A3	ENSG00000164294	GPX8	chr5:54455996:54456071:+@chr5:54456822|54456948:54457083:+	0.92	0.93	0.88	0.86	0.9	0.91	0.85	0.9	0.0355705	0.0868921	0.166634	0.052365	0.393508	0.9256	0.8735	0.9105	0.8825	0.0521	0.0151	0.0431	-0.037	-0.009	0.0521	0.0151	0.0431	0.037	0.009	TRUE	FALSE	FALSE	FALSE	FALSE	TRUE	FALSE	TRUE	TRUE	TRUE	TRUE	TRUE	TRUE
A3	ENSG00000188818	ZDHHC11	chr5:825279:825366:-@chr5:823924|824208:823504:-	0.81	0.81	0.63	0.66	0.39	0.52	0.53	0.74	0.0302674	0.0588663	0.178401	0.0991034	0.481963	0.8106	0.6485	0.4605	0.6425	0.1621	0.3501	0.1681	0.188	0.006	0.1621	0.3501	0.1681	0.188	0.006	TRUE	FALSE	FALSE	FALSE	FALSE	TRUE	FALSE	TRUE	TRUE	TRUE	TRUE	TRUE	TRUE
A3	ENSG00000115661	STK16	chr2:220110618:220110807:+@chr2:220111244|220111379:220111598:+	0.14	0.15	0.07	0.09	0.06	0.1	0.11	0.22	0.0344251	0.0976832	0.356332	0.470501	0.173946	0.1456	0.0835	0.0855	0.1725	0.0621	0.0601	-0.0269	-0.002	-0.089	0.0621	0.0601	0.0269	0.002	0.089	TRUE	FALSE	FALSE	FALSE	FALSE	TRUE	FALSE	TRUE	TRUE	TRUE	TRUE	TRUE	TRUE
A3	ENSG00000135899	SP110	chr2:231084589:231084827:-@chr2:231081536|231081643:231081496:-	0.93	0.92	0.8	0.75	0.83	0.85	0.88	0.84	0.0461999	0.0211509	0.0929849	0.0925053	0.0553206	0.9256	0.7785	0.8455	0.8675	0.1471	0.0801	0.0581	-0.067	-0.089	0.1471	0.0801	0.0581	0.067	0.089	TRUE	TRUE	FALSE	FALSE	FALSE	TRUE	FALSE	FALSE	TRUE	FALSE	TRUE	FALSE	TRUE
A3	ENSG00000138092	CENPO	chr2:25038366:25038625:+@chr2:25039515|25039600:25039686:+	0.81	0.81	0.92	0.93	0.85	0.75	0.89	0.75	0.014433	0.46732	0.424072	0.120037	0.191251	0.8106	0.9285	0.8055	0.8275	-0.1179	0.0051	-0.0169	0.123	0.101	0.1179	0.0051	0.0169	0.123	0.101	TRUE	FALSE	FALSE	FALSE	FALSE	TRUE	FALSE	TRUE	TRUE	TRUE	TRUE	TRUE	TRUE
A3	ENSG00000114982	KANSL3	chr2:97302658:97302922:-@chr2:97297219|97297280:97297049:-	0.24	0.22	0.38	0.45	0.43	0.34	0.47	0.33	0.0486809	0.0787492	0.11602	0.336799	0.452289	0.2306	0.4185	0.3905	0.4075	-0.1879	-0.1599	-0.1769	0.028	0.011	0.1879	0.1599	0.1769	0.028	0.011	TRUE	FALSE	FALSE	FALSE	FALSE	TRUE	FALSE	TRUE	TRUE	TRUE	TRUE	TRUE	TRUE
A3	ENSG00000163482	STK36	chr2:219537464:219537636:+@chr2:219538348|219538388:219538488:+	0.89	0.84	0.74	0.71	0.82	0.87	0.88	0.67	0.0324708	0.357796	0.28491	0.0390076	0.348139	0.8656	0.7285	0.8505	0.7825	0.1371	0.0151	0.0831	-0.122	-0.054	0.1371	0.0151	0.0831	0.122	0.054	TRUE	FALSE	FALSE	TRUE	FALSE	TRUE	TRUE	TRUE	TRUE	TRUE	TRUE	TRUE	TRUE
A3	ENSG00000138092	CENPO	chr2:25037245:25037362:+@chr2:25038366|25038467:25038625:+	0.95	0.96	0.89	0.91	0.83	0.94	0.95	0.95	0.0433956	0.224236	0.375353	0.427009	0.0607921	0.9556	0.9035	0.8905	0.9575	0.0521	0.0651	-0.0019	0.013	-0.054	0.0521	0.0651	0.0019	0.013	0.054	TRUE	FALSE	FALSE	FALSE	FALSE	TRUE	FALSE	TRUE	TRUE	TRUE	TRUE	TRUE	TRUE
A3	ENSG00000180902	D2HGDH	chr2:242681850:242681989:+@chr2:242683037|242683054:242683230:+	0.73	0.74	0.85	0.85	0.77	0.74	0.51	0.85	0.0116212	0.158747	0.41248	0.0490648	0.254256	0.7356	0.8535	0.7605	0.6875	-0.1179	-0.0249	0.0481	0.093	0.166	0.1179	0.0249	0.0481	0.093	0.166	TRUE	FALSE	FALSE	TRUE	FALSE	TRUE	TRUE	TRUE	TRUE	TRUE	TRUE	TRUE	TRUE
A3	ENSG00000144283	PKP4	chr2:159477743:159477933:+@chr2:159481467|159481637:159481939:+	0.74	0.76	0.86	0.86	0.75	0.76	0.86	0.81	0.0267062	0.242644	0.0651546	0.0162988	0.274422	0.7506	0.8635	0.7605	0.8425	-0.1129	-0.0099	-0.0919	0.103	0.021	0.1129	0.0099	0.0919	0.103	0.021	TRUE	FALSE	FALSE	TRUE	FALSE	TRUE	TRUE	TRUE	TRUE	TRUE	TRUE	TRUE	TRUE
A3	ENSG00000135976	ANKRD36	chr2:97913213:97913365:+@chr2:97914881|97915289:97915382:+	0.78	0.8	0.66	0.68	0.33	0.61	0.73	0.6	0.00739247	0.132866	0.156549	0.195928	0.495082	0.7906	0.6735	0.4755	0.6725	0.1171	0.3151	0.1181	0.198	0.001	0.1171	0.3151	0.1181	0.198	0.001	TRUE	FALSE	FALSE	FALSE	FALSE	TRUE	FALSE	TRUE	TRUE	TRUE	TRUE	TRUE	TRUE
A3	ENSG00000048991	R3HDM1	chr2:136402949:136403097:+@chr2:136409300|136409303:136409602:+	0.71	0.71	0.54	0.51	0.72	0.67	0.61	0.59	0.0252122	0.375536	0.0290464	0.0210478	0.0293992	0.7106	0.5285	0.7005	0.6075	0.1821	0.0101	0.1031	-0.172	-0.079	0.1821	0.0101	0.1031	0.172	0.079	TRUE	FALSE	TRUE	TRUE	TRUE	TRUE	TRUE	FALSE	TRUE	FALSE	TRUE	TRUE	FALSE
A3	ENSG00000115355	CCDC88A	chr2:55559702:55559829:-@chr2:55555568|55555571:55555430:-	0.71	0.77	0.56	0.52	0.56	0.87	0.74	0.58	0.0210593	0.459255	0.260382	0.228436	0.176056	0.7406	0.5435	0.7205	0.6675	0.1971	0.0201	0.0731	-0.177	-0.124	0.1971	0.0201	0.0731	0.177	0.124	TRUE	FALSE	FALSE	FALSE	FALSE	TRUE	FALSE	TRUE	TRUE	TRUE	TRUE	TRUE	TRUE
A3	ENSG00000144504	ANKMY1	chr2:241463302:241463798:-@chr2:241459871|241459950:241459779:-	0.78	0.82	0.69	0.71	0.49	0.63	0.5	0.63	0.0384176	0.0824159	0.0772997	0.147633	0.144424	0.8006	0.7035	0.5655	0.5725	0.0971	0.2351	0.2281	0.138	0.131	0.0971	0.2351	0.2281	0.138	0.131	TRUE	FALSE	FALSE	FALSE	FALSE	TRUE	FALSE	TRUE	TRUE	TRUE	TRUE	TRUE	TRUE
A3	NA	NA	chr2:97001484:97001586:+@chr2:97007380|97007413:97007632:+	0.56	0.53	0.62	0.64	0.71	0.6	0.66	0.62	0.026676	0.131943	0.0298243	0.353614	0.304164	0.5456	0.6335	0.6605	0.6475	-0.0879	-0.1149	-0.1019	-0.027	-0.014	0.0879	0.1149	0.1019	0.027	0.014	TRUE	FALSE	TRUE	FALSE	FALSE	TRUE	FALSE	FALSE	TRUE	FALSE	TRUE	TRUE	FALSE
A3	ENSG00000138041	SMEK2	chr2:55792038:55792177:-@chr2:55791612|55791633:55791449:-	0.88	0.9	0.75	0.78	0.84	0.83	0.76	0.92	0.0168	0.0389139	0.343474	0.0565897	0.251375	0.8906	0.7685	0.8405	0.8475	0.1221	0.0501	0.0431	-0.072	-0.079	0.1221	0.0501	0.0431	0.072	0.079	TRUE	TRUE	FALSE	FALSE	FALSE	TRUE	FALSE	FALSE	TRUE	FALSE	TRUE	FALSE	TRUE
A3	ENSG00000144283	PKP4	chr2:159477743:159477933:+@chr2:159481390|159481637:159481939:+	0.87	0.88	0.92	0.93	0.83	0.86	0.93	0.89	0.00972226	0.168386	0.131933	0.0476704	0.336532	0.8756	0.9285	0.8505	0.9175	-0.0529	0.0251	-0.0419	0.078	0.011	0.0529	0.0251	0.0419	0.078	0.011	TRUE	FALSE	FALSE	TRUE	FALSE	TRUE	TRUE	TRUE	TRUE	TRUE	TRUE	TRUE	TRUE
A3	ENSG00000196290	NIF3L1	chr2:201754108:201754375:+@chr2:201756641|201756692:201757102:+	0.7	0.67	0.61	0.57	0.58	0.6	0.61	0.6	0.0355602	0.0255967	0.0551127	0.469198	0.252004	0.6856	0.5935	0.5955	0.6125	0.0921	0.0901	0.0731	-0.002	-0.019	0.0921	0.0901	0.0731	0.002	0.019	TRUE	TRUE	FALSE	FALSE	FALSE	TRUE	FALSE	FALSE	TRUE	FALSE	TRUE	FALSE	TRUE
A3	ENSG00000100031	GGT1	chr22:25023819:25023946:+@chr22:25024048|25024206:25024355:+	0.84	0.81	0.63	0.67	0.52	0.71	0.72	0.77	0.0129672	0.135368	0.0800437	0.394416	0.0496767	0.8256	0.6535	0.6205	0.7525	0.1721	0.2051	0.0731	0.033	-0.099	0.1721	0.2051	0.0731	0.033	0.099	TRUE	FALSE	FALSE	FALSE	TRUE	TRUE	TRUE	TRUE	TRUE	TRUE	TRUE	TRUE	TRUE
A3	ENSG00000133460,ENSG00000251357	SLC2A11,AP000350.10	chr22:24219229:24219358:+@chr22:24219572|24219908:24220056:+	0.65	0.65	0.5	0.52	0.74	0.69	0.68	0.68	0.0241808	0.107269	0.00020602	0.0217857	0.0189804	0.6506	0.5135	0.7205	0.6875	0.1371	-0.0699	-0.0369	-0.207	-0.174	0.1371	0.0699	0.0369	0.207	0.174	TRUE	FALSE	FALSE	TRUE	TRUE	TRUE	TRUE	TRUE	TRUE	TRUE	TRUE	TRUE	TRUE
A3	ENSG00000133460,ENSG00000251357	SLC2A11,AP000350.10	chr22:24219229:24219358:+@chr22:24224646|24224682:24224833:+	0.9	0.89	0.8	0.8	0.65	0.78	0.86	0.88	0.0178941	0.112942	0.151753	0.212656	0.0445569	0.8956	0.8035	0.7205	0.8775	0.0921	0.1751	0.0181	0.083	-0.074	0.0921	0.1751	0.0181	0.083	0.074	TRUE	FALSE	FALSE	FALSE	TRUE	TRUE	TRUE	TRUE	TRUE	TRUE	TRUE	TRUE	TRUE
A3	NA	NA	chr22:38071613:38071718:+@chr22:38072863|38072993:38073072:+	0.7	0.68	0.56	0.53	0.78	0.55	0.69	0.67	0.0101433	0.44473	0.423189	0.239001	0.0114746	0.6906	0.5485	0.6705	0.6875	0.1421	0.0201	0.0031	-0.122	-0.139	0.1421	0.0201	0.0031	0.122	0.139	TRUE	FALSE	FALSE	FALSE	TRUE	TRUE	TRUE	TRUE	TRUE	TRUE	TRUE	TRUE	TRUE
A3	ENSG00000184674	GSTT1	chr22:24384120:24384284:-@chr22:24379450|24379511:24379361:-	0.67	0.65	0.49	0.42	0.71	0.34	0.57	0.74	0.0428693	0.304439	0.49294	0.381751	0.109721	0.6606	0.4585	0.5305	0.6625	0.2021	0.1301	-0.0019	-0.072	-0.204	0.2021	0.1301	0.0019	0.072	0.204	TRUE	FALSE	FALSE	FALSE	FALSE	TRUE	FALSE	TRUE	TRUE	TRUE	TRUE	TRUE	TRUE
A3	ENSG00000198832	RP3-412A9.11	chr22:31503363:31503551:-@chr22:31502032|31502149:31501916:-	0.51	0.4	0.12	0.24	0.13	0.57	0.2	0.36	0.0404786	0.36465	0.121576	0.287825	0.208658	0.4556	0.1835	0.3555	0.2875	0.2721	0.1001	0.1681	-0.172	-0.104	0.2721	0.1001	0.1681	0.172	0.104	TRUE	FALSE	FALSE	FALSE	FALSE	TRUE	FALSE	TRUE	TRUE	TRUE	TRUE	TRUE	TRUE
A3	ENSG00000197182	hsa-mir-4763	chr22:46505147:46505233:+@chr22:46505551|46505644:46509808:+	0.57	0.52	0.74	0.75	0.73	0.64	0.51	0.57	0.0341254	0.0679586	0.483148	0.20709	0.0436825	0.5456	0.7485	0.6905	0.5475	-0.2029	-0.1449	-0.0019	0.058	0.201	0.2029	0.1449	0.0019	0.058	0.201	TRUE	FALSE	FALSE	FALSE	TRUE	TRUE	TRUE	TRUE	TRUE	TRUE	TRUE	TRUE	TRUE
A3	ENSG00000025770	NCAPH2	chr22:50961250:50961351:+@chr22:50961446|50961509:50961595:+	0.68	0.7	0.51	0.49	0.51	0.55	0.67	0.55	0.00258632	0.0233645	0.215622	0.168794	0.150079	0.6906	0.5035	0.5355	0.6175	0.1871	0.1551	0.0731	-0.032	-0.114	0.1871	0.1551	0.0731	0.032	0.114	TRUE	TRUE	FALSE	FALSE	FALSE	TRUE	FALSE	FALSE	TRUE	FALSE	TRUE	FALSE	TRUE
A3	ENSG00000100348	TXN2	chr22:36877611:36877687:-@chr22:36876795|36876834:36876622:-	0.93	0.95	0.84	0.82	0.9	0.95	0.9	0.88	0.00776901	0.381466	0.0428829	0.0653053	0.0206766	0.9406	0.8335	0.9305	0.8975	0.1071	0.0101	0.0431	-0.097	-0.064	0.1071	0.0101	0.0431	0.097	0.064	TRUE	FALSE	FALSE	FALSE	TRUE	TRUE	TRUE	TRUE	TRUE	TRUE	TRUE	TRUE	TRUE
A3	ENSG00000114098	ARMC8	chr3:137906148:137906441:+@chr3:137907243|137907297:137907372:+	0.08	0.12	0.22	0.17	0.18	0.04	0.12	0.05	0.047307	0.433397	0.430683	0.215928	0.0712609	0.1006	0.1985	0.1155	0.0925	-0.0979	-0.0149	0.0081	0.083	0.106	0.0979	0.0149	0.0081	0.083	0.106	TRUE	FALSE	FALSE	FALSE	FALSE	TRUE	FALSE	TRUE	TRUE	TRUE	TRUE	TRUE	TRUE
A3	ENSG00000184432	COPB2	chr3:139108390:139108522:-@chr3:139104042|139104271:139103846:-	0.16	0.12	0.43	0.45	0.28	0.22	0.36	0.16	0.00790696	0.0495158	0.208652	0.0357479	0.162499	0.1406	0.4435	0.2555	0.2675	-0.3029	-0.1149	-0.1269	0.188	0.176	0.3029	0.1149	0.1269	0.188	0.176	TRUE	TRUE	FALSE	TRUE	FALSE	TRUE	TRUE	FALSE	TRUE	FALSE	TRUE	FALSE	TRUE
A3	NA	NA	chr3:42597422:42597487:-@chr3:42590149|42594940:42589459:-	0.27	0.26	0.34	0.33	0.34	0.31	0.35	0.37	0.00510641	0.0537147	0.0148563	0.339748	0.0914262	0.2656	0.3385	0.3305	0.3675	-0.0729	-0.0649	-0.1019	0.008	-0.029	0.0729	0.0649	0.1019	0.008	0.029	TRUE	FALSE	TRUE	FALSE	FALSE	TRUE	FALSE	FALSE	TRUE	FALSE	TRUE	TRUE	FALSE
A3	ENSG00000188313	PLSCR1	chr3:146243392:146243434:-@chr3:146239768|146239840:146239620:-	0.85	0.87	0.74	0.76	0.7	0.79	0.78	0.81	0.00878851	0.118891	0.0540514	0.479188	0.0684382	0.8606	0.7535	0.7505	0.8025	0.1071	0.1101	0.0581	0.003	-0.049	0.1071	0.1101	0.0581	0.003	0.049	TRUE	FALSE	FALSE	FALSE	FALSE	TRUE	FALSE	TRUE	TRUE	TRUE	TRUE	TRUE	TRUE
A3	ENSG00000173702	MUC13	chr3:124653505:124653595:-@chr3:124646447|124646837:124646379:-	0.55	0.58	0.44	0.42	0.58	0.41	0.53	0.43	0.0127379	0.290367	0.172414	0.286255	0.234143	0.5656	0.4335	0.5005	0.4875	0.1321	0.0651	0.0781	-0.067	-0.054	0.1321	0.0651	0.0781	0.067	0.054	TRUE	FALSE	FALSE	FALSE	FALSE	TRUE	FALSE	TRUE	TRUE	TRUE	TRUE	TRUE	TRUE
A3	ENSG00000004534	RBM6	chr3:50000009:50000118:+@chr3:50004631|50004903:50006181:+	0.18	0.21	0.25	0.27	0.29	0.22	0.24	0.2	0.0368357	0.140856	0.164616	0.472751	0.140525	0.1956	0.2635	0.2605	0.2275	-0.0679	-0.0649	-0.0319	0.003	0.036	0.0679	0.0649	0.0319	0.003	0.036	TRUE	FALSE	FALSE	FALSE	FALSE	TRUE	FALSE	TRUE	TRUE	TRUE	TRUE	TRUE	TRUE
A3	ENSG00000164051	CCDC51	chr3:48481398:48481529:-@chr3:48476420|48476546:48476227:-	0.97	0.96	0.91	0.91	0.95	0.94	0.93	0.96	0.0318621	0.0844371	0.274569	0.0369736	0.120263	0.9656	0.9135	0.9505	0.9525	0.0521	0.0151	0.0131	-0.037	-0.039	0.0521	0.0151	0.0131	0.037	0.039	TRUE	FALSE	FALSE	FALSE	FALSE	TRUE	FALSE	TRUE	TRUE	TRUE	TRUE	TRUE	TRUE
A3	ENSG00000178149	DALRD3	chr3:49053591:49053773:-@chr3:49053493|49053519:49053406:-	0.6	0.54	0.77	0.74	0.55	0.71	0.47	0.75	0.0304658	0.282426	0.397782	0.1814	0.248891	0.5706	0.7585	0.6355	0.6175	-0.1879	-0.0649	-0.0469	0.123	0.141	0.1879	0.0649	0.0469	0.123	0.141	TRUE	FALSE	FALSE	FALSE	FALSE	TRUE	FALSE	TRUE	TRUE	TRUE	TRUE	TRUE	TRUE
A3	ENSG00000065485,ENSG00000121542	PDIA5,SEC22A	chr3:122928046:122928246:+@chr3:122942406|122942491:122942569:+	0.87	0.91	0.76	0.77	0.78	0.85	0.89	0.81	0.0411333	0.129997	0.277365	0.18847	0.130365	0.8906	0.7685	0.8205	0.8575	0.1221	0.0701	0.0331	-0.052	-0.089	0.1221	0.0701	0.0331	0.052	0.089	TRUE	FALSE	FALSE	FALSE	FALSE	TRUE	FALSE	TRUE	TRUE	TRUE	TRUE	TRUE	TRUE
A3	ENSG00000174292	TNK1	chr17:7289880:7289974:+@chr17:7290294|7290309:7290473:+	0.37	0.36	0.22	0.16	0.29	0.21	0.25	0.33	0.0494908	0.106931	0.168852	0.172027	0.0927218	0.3656	0.1935	0.2555	0.2975	0.1721	0.1101	0.0681	-0.062	-0.104	0.1721	0.1101	0.0681	0.062	0.104	TRUE	FALSE	FALSE	FALSE	FALSE	TRUE	FALSE	TRUE	TRUE	TRUE	TRUE	TRUE	TRUE
A3	ENSG00000198920	KIAA0753	chr17:6528075:6528181:-@chr17:6527008|6527326:6526927:-	0.4	0.44	0.53	0.51	0.63	0.58	0.6	0.45	0.0377609	0.0146491	0.181165	0.0698718	0.461801	0.4206	0.5235	0.6105	0.5325	-0.1029	-0.1899	-0.1119	-0.087	-0.009	0.1029	0.1899	0.1119	0.087	0.009	TRUE	TRUE	FALSE	FALSE	FALSE	TRUE	FALSE	FALSE	TRUE	FALSE	TRUE	FALSE	TRUE
A3	ENSG00000082641	NFE2L1	chr17:46127969:46128990:+@chr17:46133748|46133781:46133960:+	0.94	0.96	0.89	0.9	0.91	0.92	0.94	0.91	0.0321269	0.0715492	0.210564	0.0527864	0.113183	0.9506	0.8985	0.9205	0.9325	0.0521	0.0301	0.0181	-0.022	-0.034	0.0521	0.0301	0.0181	0.022	0.034	TRUE	FALSE	FALSE	FALSE	FALSE	TRUE	FALSE	TRUE	TRUE	TRUE	TRUE	TRUE	TRUE
A3	ENSG00000108599	AKAP10	chr17:19871727:19871774:-@chr17:19866304|19866335:19866153:-	0.77	0.79	0.73	0.7	0.76	0.77	0.68	0.79	0.0430837	0.239012	0.308066	0.0695963	0.370483	0.7806	0.7185	0.7705	0.7425	0.0621	0.0101	0.0381	-0.052	-0.024	0.0621	0.0101	0.0381	0.052	0.024	TRUE	FALSE	FALSE	FALSE	FALSE	TRUE	FALSE	TRUE	TRUE	TRUE	TRUE	TRUE	TRUE
A3	ENSG00000129667	RHBDF2	chr17:74477457:74477627:-@chr17:74475936|74476023:74475815:-	0.09	0.13	0.25	0.24	0.28	0.21	0.17	0.16	0.0384941	0.049782	0.0902717	0.481605	0.00346944	0.1106	0.2485	0.2505	0.1725	-0.1379	-0.1399	-0.0619	-0.002	0.076	0.1379	0.1399	0.0619	0.002	0.076	TRUE	TRUE	FALSE	FALSE	TRUE	TRUE	TRUE	FALSE	TRUE	FALSE	TRUE	FALSE	TRUE
A3	ENSG00000185128	TBC1D3F	chr17:36285779:36285864:+@chr17:36286965|36287148:36287187:+	0.54	0.58	0.44	0.41	0.38	0.39	0.46	0.65	0.019318	0.0282024	0.493702	0.100084	0.195087	0.5606	0.4285	0.3905	0.5625	0.1321	0.1701	-0.0019	0.038	-0.134	0.1321	0.1701	0.0019	0.038	0.134	TRUE	TRUE	FALSE	FALSE	FALSE	TRUE	FALSE	FALSE	TRUE	FALSE	TRUE	FALSE	TRUE
A3	ENSG00000076382,ENSG00000258472	SPAG5,RP11-192H23.4	chr17:26925528:26925653:-@chr17:26919492|26919495:26919000:-	0.57	0.56	0.48	0.5	0.36	0.36	0.51	0.78	0.0246554	0.00813494	0.31846	0.0258106	0.224234	0.5656	0.4935	0.3655	0.6525	0.0721	0.2001	-0.0869	0.128	-0.159	0.0721	0.2001	0.0869	0.128	0.159	TRUE	TRUE	FALSE	TRUE	FALSE	TRUE	TRUE	FALSE	TRUE	FALSE	TRUE	FALSE	TRUE
A3	ENSG00000109113	RAB34	chr17:27045140:27045286:-@chr17:27044611|27044638:27044231:-	0.46	0.5	0.59	0.57	0.41	0.77	0.57	0.6	0.0377609	0.319413	0.0255098	0.478876	0.339122	0.4806	0.5835	0.5955	0.5925	-0.1029	-0.1149	-0.1119	-0.012	-0.009	0.1029	0.1149	0.1119	0.012	0.009	TRUE	FALSE	TRUE	FALSE	FALSE	TRUE	FALSE	FALSE	TRUE	FALSE	TRUE	TRUE	FALSE
A3	ENSG00000172171	TEFM	chr17:29231084:29231547:-@chr17:29227539|29227580:29227431:-	0.96	0.96	0.88	0.86	0.94	0.86	0.8	0.93	0.0343637	0.197968	0.203496	0.281955	0.495153	0.9606	0.8735	0.9055	0.8725	0.0871	0.0551	0.0881	-0.032	0.001	0.0871	0.0551	0.0881	0.032	0.001	TRUE	FALSE	FALSE	FALSE	FALSE	TRUE	FALSE	TRUE	TRUE	TRUE	TRUE	TRUE	TRUE
A3	ENSG00000125450	NUP85	chr17:73230732:73230883:+@chr17:73231195|73231211:73231296:+	0.95	0.93	0.79	0.84	0.79	0.86	0.8	0.91	0.0472778	0.0881128	0.193692	0.40586	0.286032	0.9406	0.8185	0.8305	0.8625	0.1221	0.1101	0.0781	-0.012	-0.044	0.1221	0.1101	0.0781	0.012	0.044	TRUE	FALSE	FALSE	FALSE	FALSE	TRUE	FALSE	TRUE	TRUE	TRUE	TRUE	TRUE	TRUE
A3	ENSG00000177731	FLII	chr17:18161942:18162055:-@chr17:18160333|18160440:18160223:-	0.03	0.04	0.15	0.15	0.08	0.18	0.17	0.18	0.0116212	0.147931	0.00137119	0.391012	0.058448	0.0356	0.1535	0.1355	0.1825	-0.1179	-0.0999	-0.1469	0.018	-0.029	0.1179	0.0999	0.1469	0.018	0.029	TRUE	FALSE	TRUE	FALSE	FALSE	TRUE	FALSE	FALSE	TRUE	FALSE	TRUE	TRUE	FALSE
A3	ENSG00000262481,ENSG00000187838	C17orf61-PLSCR3,PLSCR3	chr17:7298227:7298409:-@chr17:7297590|7298053:7297423:-	0.62	0.58	0.33	0.33	0.63	0.26	0.73	0.24	0.024202	0.282243	0.3675	0.320107	0.316465	0.6006	0.3335	0.4505	0.4925	0.2671	0.1501	0.1081	-0.117	-0.159	0.2671	0.1501	0.1081	0.117	0.159	TRUE	FALSE	FALSE	FALSE	FALSE	TRUE	FALSE	TRUE	TRUE	TRUE	TRUE	TRUE	TRUE
A3	ENSG00000175061	C17orf76-AS1	chr17:16342641:16342728:+@chr17:16342842|16342974:16343017:+	0.58	0.59	0.5	0.48	0.58	0.43	0.7	0.55	0.0159355	0.248522	0.321109	0.42869	0.154672	0.5856	0.4935	0.5105	0.6325	0.0921	0.0751	-0.0469	-0.017	-0.139	0.0921	0.0751	0.0469	0.017	0.139	TRUE	FALSE	FALSE	FALSE	FALSE	TRUE	FALSE	TRUE	TRUE	TRUE	TRUE	TRUE	TRUE
A3	ENSG00000185624	P4HB	chr17:79805119:79805223:-@chr17:79804888|79804948:79804823:-	0.76	0.81	0.69	0.65	0.72	0.75	0.73	0.76	0.0378272	0.141429	0.195542	0.0605142	0.046188	0.7856	0.6735	0.7405	0.7525	0.1121	0.0451	0.0331	-0.067	-0.079	0.1121	0.0451	0.0331	0.067	0.079	TRUE	FALSE	FALSE	FALSE	TRUE	TRUE	TRUE	TRUE	TRUE	TRUE	TRUE	TRUE	TRUE
A3	ENSG00000171953	ATPAF2	chr17:17925059:17925171:-@chr17:17924552|17924977:17924437:-	0.28	0.28	0.5	0.45	0.51	0.32	0.13	0.19	0.0391726	0.1891	0.0838182	0.324488	0.00879855	0.2806	0.4785	0.4205	0.1675	-0.1979	-0.1399	0.1131	0.058	0.311	0.1979	0.1399	0.1131	0.058	0.311	TRUE	FALSE	FALSE	FALSE	TRUE	TRUE	TRUE	TRUE	TRUE	TRUE	TRUE	TRUE	TRUE
A3	ENSG00000109046	WSB1	chr17:25621106:25621461:+@chr17:25628814|25628907:25628982:+	0.84	0.84	0.93	0.95	0.84	0.88	0.9	0.89	0.0321955	0.219218	0.0223195	0.0570674	0.0597466	0.8406	0.9435	0.8655	0.9025	-0.1029	-0.0249	-0.0619	0.078	0.041	0.1029	0.0249	0.0619	0.078	0.041	TRUE	FALSE	TRUE	FALSE	FALSE	TRUE	FALSE	FALSE	TRUE	FALSE	TRUE	TRUE	FALSE
A3	ENSG00000108262	GIT1	chr17:27916345:27916610:-@chr17:27910609|27910634:27910501:-	0.92	0.91	0.86	0.85	0.71	0.83	0.89	0.89	0.00813077	0.128651	0.0909805	0.200003	0.0350502	0.9156	0.8585	0.7755	0.8975	0.0571	0.1401	0.0181	0.083	-0.039	0.0571	0.1401	0.0181	0.083	0.039	TRUE	FALSE	FALSE	FALSE	FALSE	TRUE	FALSE	TRUE	TRUE	TRUE	TRUE	TRUE	TRUE
A3	NA	NA	chr17:1616997:1617308:-@chr17:1615693|1616189:1614798:-	0.69	0.62	0.48	0.54	0.48	0.41	0.54	0.5	0.0478752	0.026765	0.0593426	0.153204	0.370944	0.6556	0.5135	0.4505	0.5275	0.1421	0.2051	0.1281	0.063	-0.014	0.1421	0.2051	0.1281	0.063	0.014	TRUE	TRUE	FALSE	FALSE	FALSE	TRUE	FALSE	FALSE	TRUE	FALSE	TRUE	FALSE	TRUE
A3	ENSG00000181523	SGSH	chr17:78194025:78194199:-@chr17:78190991|78191026:78190831:-	0.07	0.06	0.15	0.15	0.16	0.04	0.11	0.1	0.0187619	0.311838	0.0117863	0.283921	0.0333141	0.0656	0.1535	0.1055	0.1125	-0.0879	-0.0399	-0.0469	0.048	0.041	0.0879	0.0399	0.0469	0.048	0.041	TRUE	FALSE	FALSE	FALSE	FALSE	TRUE	FALSE	TRUE	TRUE	TRUE	TRUE	TRUE	TRUE
A3	ENSG00000004897	CDC27	chr17:45234596:45234750:-@chr17:45234349|45234490:45234279:-	0.87	0.84	0.91	0.94	0.88	0.92	0.91	0.88	0.0396498	0.100399	0.0786761	0.235611	0.172873	0.8556	0.9285	0.9055	0.9025	-0.0729	-0.0499	-0.0469	0.023	0.026	0.0729	0.0499	0.0469	0.023	0.026	TRUE	FALSE	FALSE	FALSE	FALSE	TRUE	FALSE	TRUE	TRUE	TRUE	TRUE	TRUE	TRUE
A3	NA	NA	chr11:47493743:47493909:-@chr11:47492441|47493654:47487489:-	0.94	0.97	0.87	0.88	0.78	0.69	0.8	0.85	0.0436321	0.0517326	0.0383359	0.0970105	0.156088	0.9556	0.8785	0.7405	0.8325	0.0771	0.2151	0.1231	0.138	0.046	0.0771	0.2151	0.1231	0.138	0.046	TRUE	FALSE	TRUE	FALSE	FALSE	TRUE	FALSE	FALSE	TRUE	FALSE	TRUE	TRUE	FALSE
A3	ENSG00000173039	RELA	chr11:65423159:65423233:-@chr11:65422264|65422471:65421067:-	0.35	0.36	0.4	0.41	0.37	0.43	0.39	0.41	0.00972226	0.172261	0.0436147	0.468913	0.471282	0.3556	0.4085	0.4055	0.4075	-0.0529	-0.0499	-0.0519	0.003	0.001	0.0529	0.0499	0.0519	0.003	0.001	TRUE	FALSE	TRUE	FALSE	FALSE	TRUE	FALSE	FALSE	TRUE	FALSE	TRUE	TRUE	FALSE
A3	ENSG00000172830	SSH3	chr11:67071589:67071626:+@chr11:67072244|67072248:67072478:+	0.93	0.91	0.84	0.87	0.61	0.82	0.85	0.82	0.0476748	0.153252	0.0288015	0.206055	0.264959	0.9206	0.8585	0.7205	0.8425	0.0621	0.2001	0.0781	0.138	0.016	0.0621	0.2001	0.0781	0.138	0.016	TRUE	FALSE	TRUE	FALSE	FALSE	TRUE	FALSE	FALSE	TRUE	FALSE	TRUE	TRUE	FALSE
A3	ENSG00000162144	CYBASC3	chr11:61124002:61124200:-@chr11:61121295|61121464:61121256:-	0.83	0.83	0.64	0.66	0.67	0.73	0.82	0.7	0.0187201	0.0760938	0.240653	0.158681	0.149452	0.8306	0.6535	0.7055	0.7675	0.1771	0.1251	0.0631	-0.052	-0.114	0.1771	0.1251	0.0631	0.052	0.114	TRUE	FALSE	FALSE	FALSE	FALSE	TRUE	FALSE	TRUE	TRUE	TRUE	TRUE	TRUE	TRUE
A3	ENSG00000162227	TAF6L	chr11:62538775:62538962:+@chr11:62543122|62543243:62543402:+	0.05	0.03	0.1	0.12	0.07	0.09	0.08	0.05	0.0193666	0.0467085	0.114236	0.1	0.0806657	0.0406	0.1135	0.0855	0.0725	-0.0729	-0.0449	-0.0319	0.028	0.041	0.0729	0.0449	0.0319	0.028	0.041	TRUE	FALSE	FALSE	FALSE	FALSE	TRUE	FALSE	TRUE	TRUE	TRUE	TRUE	TRUE	TRUE
A3	ENSG00000109920	FNBP4	chr11:47758168:47758292:-@chr11:47755675|47755681:47755577:-	0.69	0.65	0.74	0.78	0.73	0.77	0.74	0.83	0.0423876	0.0495469	0.0937048	0.404245	0.320603	0.6706	0.7635	0.7555	0.7925	-0.0929	-0.0849	-0.1219	0.008	-0.029	0.0929	0.0849	0.1219	0.008	0.029	TRUE	TRUE	FALSE	FALSE	FALSE	TRUE	FALSE	FALSE	TRUE	FALSE	TRUE	FALSE	TRUE
A3	ENSG00000183020	AP2A2	chr11:984645:984753:+@chr11:985432|985435:985582:+	0.38	0.42	0.27	0.24	0.24	0.26	0.37	0.69	0.0169814	0.0212621	0.274701	0.441821	0.165235	0.4006	0.2585	0.2555	0.5375	0.1421	0.1451	-0.1369	0.003	-0.279	0.1421	0.1451	0.1369	0.003	0.279	TRUE	TRUE	FALSE	FALSE	FALSE	TRUE	FALSE	FALSE	TRUE	FALSE	TRUE	FALSE	TRUE
A3	ENSG00000166250	CLMP	chr11:122953793:122953915:-@chr11:122945551|122945558:122945410:-	0.21	0.26	0.12	0.08	0.33	0.06	0.13	0.06	0.0284277	0.418979	0.0500419	0.300714	0.49134	0.2356	0.1035	0.2005	0.1025	0.1321	0.0351	0.1331	-0.097	0.001	0.1321	0.0351	0.1331	0.097	0.001	TRUE	FALSE	FALSE	FALSE	FALSE	TRUE	FALSE	TRUE	TRUE	TRUE	TRUE	TRUE	TRUE
A3	ENSG00000247137	RP11-727A23.5	chr11:82904509:82904836:-@chr11:82903834|82903858:82903778:-	0.92	0.94	0.88	0.86	0.86	0.79	0.69	0.91	0.0258303	0.0955356	0.232368	0.210537	0.328545	0.9306	0.8735	0.8305	0.8075	0.0571	0.1001	0.1231	0.043	0.066	0.0571	0.1001	0.1231	0.043	0.066	TRUE	FALSE	FALSE	FALSE	FALSE	TRUE	FALSE	TRUE	TRUE	TRUE	TRUE	TRUE	TRUE
A3	NA	NA	chr11:47493743:47493909:-@chr11:47490443|47493654:47487489:-	0.73	0.75	0.62	0.62	0.63	0.52	0.61	0.57	0.0257477	0.0999882	0.0233036	0.287369	0.204776	0.7406	0.6235	0.5805	0.5975	0.1171	0.1601	0.1431	0.043	0.026	0.1171	0.1601	0.1431	0.043	0.026	TRUE	FALSE	TRUE	FALSE	FALSE	TRUE	FALSE	FALSE	TRUE	FALSE	TRUE	TRUE	FALSE
A3	NA	NA	chr11:47493743:47493909:-@chr11:47490443|47492441:47487489:-	0.69	0.72	0.57	0.57	0.63	0.51	0.59	0.53	0.0348931	0.129264	0.0436729	0.489305	0.436132	0.7056	0.5735	0.5755	0.5675	0.1321	0.1301	0.1381	-0.002	0.006	0.1321	0.1301	0.1381	0.002	0.006	TRUE	FALSE	TRUE	FALSE	FALSE	TRUE	FALSE	FALSE	TRUE	FALSE	TRUE	TRUE	FALSE
A3	ENSG00000162191	UBXN1	chr11:62445399:62445590:-@chr11:62445057|62445304:62444990:-	0.41	0.4	0.56	0.56	0.48	0.41	0.35	0.42	0.0103494	0.206634	0.387594	0.0942894	0.0651262	0.4056	0.5635	0.4505	0.3925	-0.1579	-0.0449	0.0131	0.113	0.171	0.1579	0.0449	0.0131	0.113	0.171	TRUE	FALSE	FALSE	FALSE	FALSE	TRUE	FALSE	TRUE	TRUE	TRUE	TRUE	TRUE	TRUE
A3	ENSG00000174516	PELI3	chr11:66241208:66241396:+@chr11:66243043|66243069:66244808:+	0.06	0.06	0.17	0.15	0.17	0.12	0.1	0.3	0.0291027	0.0846492	0.190985	0.345825	0.368657	0.0606	0.1635	0.1505	0.2075	-0.1029	-0.0899	-0.1469	0.013	-0.044	0.1029	0.0899	0.1469	0.013	0.044	TRUE	FALSE	FALSE	FALSE	FALSE	TRUE	FALSE	TRUE	TRUE	TRUE	TRUE	TRUE	TRUE
A3	ENSG00000137504	CREBZF	chr11:85373433:85373501:-@chr11:85371641|85372793:85371379:-	0.86	0.83	0.77	0.75	0.77	0.82	0.61	0.67	0.0314982	0.147115	0.0271405	0.182992	0.0693274	0.8456	0.7635	0.8005	0.6475	0.0821	0.0451	0.1981	-0.037	0.116	0.0821	0.0451	0.1981	0.037	0.116	TRUE	FALSE	TRUE	FALSE	FALSE	TRUE	FALSE	FALSE	TRUE	FALSE	TRUE	TRUE	FALSE
A3	ENSG00000133318	RTN3	chr11:63448922:63449250:+@chr11:63486174|63486453:63488504:+	0.12	0.07	0.24	0.3	0.25	0.27	0.2	0.2	0.0245828	0.0305188	0.0709891	0.419493	0.137756	0.0956	0.2735	0.2655	0.2075	-0.1779	-0.1699	-0.1119	0.008	0.066	0.1779	0.1699	0.1119	0.008	0.066	TRUE	TRUE	FALSE	FALSE	FALSE	TRUE	FALSE	FALSE	TRUE	FALSE	TRUE	FALSE	TRUE
A3	ENSG00000134802	SLC43A3	chr11:57194061:57194125:-@chr11:57193825|57193862:57193462:-	0.18	0.19	0.12	0.12	0.34	0.25	0.19	0.19	0.0223687	0.116075	0.115711	0.0783825	4.56475e-05	0.1856	0.1235	0.3005	0.1975	0.0621	-0.1149	-0.0119	-0.177	-0.074	0.0621	0.1149	0.0119	0.177	0.074	TRUE	FALSE	FALSE	FALSE	TRUE	TRUE	TRUE	TRUE	TRUE	TRUE	TRUE	TRUE	TRUE
A3	ENSG00000176485	PLA2G16	chr11:63381472:63381909:-@chr11:63365585|63365635:63365533:-	0.9	0.9	0.8	0.79	0.86	0.84	0.82	0.88	0.0134406	0.0658145	0.196014	0.0319118	0.149234	0.9006	0.7985	0.8555	0.8575	0.1021	0.0451	0.0431	-0.057	-0.059	0.1021	0.0451	0.0431	0.057	0.059	TRUE	FALSE	FALSE	TRUE	FALSE	TRUE	TRUE	TRUE	TRUE	TRUE	TRUE	TRUE	TRUE
A3	ENSG00000166250	CLMP	chr11:122953793:122953915:-@chr11:122945524|122945551:122945410:-	0.76	0.77	0.83	0.81	0.64	0.89	0.84	0.89	0.0307094	0.48758	0.0698103	0.372818	0.139953	0.7656	0.8235	0.7705	0.8725	-0.0579	-0.0049	-0.1069	0.053	-0.049	0.0579	0.0049	0.1069	0.053	0.049	TRUE	FALSE	FALSE	FALSE	FALSE	TRUE	FALSE	TRUE	TRUE	TRUE	TRUE	TRUE	TRUE
A3	NA	NA	chr11:85358963:85359133:+@chr11:85361293|85361356:85361385:+	0.77	0.87	0.63	0.52	0.73	0.62	0.64	0.7	0.0412246	0.0993809	0.0790917	0.158364	0.142841	0.8206	0.5785	0.6805	0.6775	0.2421	0.1401	0.1431	-0.102	-0.099	0.2421	0.1401	0.1431	0.102	0.099	TRUE	FALSE	FALSE	FALSE	FALSE	TRUE	FALSE	TRUE	TRUE	TRUE	TRUE	TRUE	TRUE
A3	ENSG00000149582	TMEM25	chr11:118402490:118402586:+@chr11:118402865|118403125:118403176:+	0.44	0.45	0.5	0.5	0.48	0.71	0.47	0.44	0.0240241	0.203805	0.220706	0.277641	0.108024	0.4456	0.5035	0.6005	0.4625	-0.0579	-0.1549	-0.0169	-0.097	0.041	0.0579	0.1549	0.0169	0.097	0.041	TRUE	FALSE	FALSE	FALSE	FALSE	TRUE	FALSE	TRUE	TRUE	TRUE	TRUE	TRUE	TRUE
A3	ENSG00000134802	SLC43A3	chr11:57194535:57194594:-@chr11:57193825|57193845:57193462:-	0.41	0.33	0.18	0.11	0.58	0.25	0.42	0.3	0.0274869	0.406733	0.484999	0.168734	0.0568065	0.3706	0.1485	0.4205	0.3675	0.2221	-0.0499	0.0031	-0.272	-0.219	0.2221	0.0499	0.0031	0.272	0.219	TRUE	FALSE	FALSE	FALSE	FALSE	TRUE	FALSE	TRUE	TRUE	TRUE	TRUE	TRUE	TRUE
A3	ENSG00000138614	C15orf44	chr15:65903024:65903486:-@chr15:65899763|65899780:65899497:-	0.75	0.76	0.83	0.81	0.75	0.79	0.73	0.83	0.0245548	0.252706	0.320564	0.109096	0.302285	0.7556	0.8235	0.7755	0.7875	-0.0679	-0.0199	-0.0319	0.048	0.036	0.0679	0.0199	0.0319	0.048	0.036	TRUE	FALSE	FALSE	FALSE	FALSE	TRUE	FALSE	TRUE	TRUE	TRUE	TRUE	TRUE	TRUE
A3	ENSG00000138614	C15orf44	chr15:65903134:65903486:-@chr15:65899763|65899780:65899497:-	0.83	0.8	0.72	0.7	0.55	0.87	0.55	0.8	0.0222713	0.322389	0.2398	0.496035	0.422951	0.8156	0.7135	0.7155	0.6825	0.1021	0.1001	0.1331	-0.002	0.031	0.1021	0.1001	0.1331	0.002	0.031	TRUE	FALSE	FALSE	FALSE	FALSE	TRUE	FALSE	TRUE	TRUE	TRUE	TRUE	TRUE	TRUE
A3	ENSG00000179335	CLK3	chr15:74912350:74912566:+@chr15:74914461|74914835:74914901:+	0.41	0.46	0.6	0.55	0.34	0.31	0.73	0.58	0.0271353	0.0453234	0.0874637	0.0117718	0.226077	0.4356	0.5785	0.3305	0.6625	-0.1429	0.1051	-0.2269	0.248	-0.084	0.1429	0.1051	0.2269	0.248	0.084	TRUE	TRUE	FALSE	TRUE	FALSE	TRUE	TRUE	FALSE	TRUE	FALSE	TRUE	FALSE	TRUE
A3	ENSG00000154237	LRRK1	chr15:101601376:101601493:+@chr15:101602586|101602779:101602895:+	0.09	0.14	0.51	0.42	0.2	0.3	0.38	0.13	0.0185869	0.0880352	0.221314	0.0443953	0.162702	0.1156	0.4685	0.2555	0.2625	-0.3529	-0.1399	-0.1469	0.213	0.206	0.3529	0.1399	0.1469	0.213	0.206	TRUE	FALSE	FALSE	TRUE	FALSE	TRUE	TRUE	TRUE	TRUE	TRUE	TRUE	TRUE	TRUE
A3	ENSG00000259332	RP11-38G5.1	chr15:80215794:80216096:-@chr15:80200026|80200048:80199971:-	0.28	0.3	0.12	0.16	0.1	0.17	0.06	0.08	0.0251457	0.0641216	0.0022874	0.474874	0.0714644	0.2906	0.1435	0.1405	0.0775	0.1471	0.1501	0.2131	0.003	0.066	0.1471	0.1501	0.2131	0.003	0.066	TRUE	FALSE	TRUE	FALSE	FALSE	TRUE	FALSE	FALSE	TRUE	FALSE	TRUE	TRUE	FALSE
A3	ENSG00000174442	ZWILCH	chr15:66797431:66797729:+@chr15:66801084|66801179:66801230:+	0.42	0.38	0.18	0.25	0.51	0.78	0.53	0.6	0.0349172	0.155512	0.0380796	0.0874711	0.009763	0.4006	0.2185	0.6505	0.5725	0.1821	-0.2499	-0.1719	-0.432	-0.354	0.1821	0.2499	0.1719	0.432	0.354	TRUE	FALSE	TRUE	FALSE	TRUE	TRUE	TRUE	FALSE	TRUE	FALSE	TRUE	TRUE	FALSE
A3	ENSG00000178761	FAM219B	chr15:75198928:75199462:-@chr15:75197572|75198706:75197005:-	0.51	0.5	0.45	0.43	0.48	0.55	0.41	0.4	0.0243396	0.373587	0.00319536	0.129108	0.0721573	0.5056	0.4435	0.5205	0.4125	0.0621	-0.0149	0.0931	-0.077	0.031	0.0621	0.0149	0.0931	0.077	0.031	TRUE	FALSE	TRUE	FALSE	FALSE	TRUE	FALSE	FALSE	TRUE	FALSE	TRUE	TRUE	FALSE
A3	ENSG00000223501	VPS52	chr6:33237267:33237334:-@chr6:33236966|33236995:33236791:-	0.15	0.16	0.23	0.21	0.21	0.12	0.19	0.27	0.0245548	0.397212	0.144538	0.219447	0.394465	0.1556	0.2235	0.1705	0.2375	-0.0679	-0.0149	-0.0819	0.053	-0.014	0.0679	0.0149	0.0819	0.053	0.014	TRUE	FALSE	FALSE	FALSE	FALSE	TRUE	FALSE	TRUE	TRUE	TRUE	TRUE	TRUE	TRUE
A3	ENSG00000153291	SLC25A27	chr6:46638863:46638965:+@chr6:46644120|46644384:46645927:+	0.26	0.36	0.72	0.66	0.47	0.15	0.3	0.71	0.0180335	0.490362	0.250486	0.122549	0.269411	0.3106	0.6935	0.3155	0.5125	-0.3829	-0.0049	-0.2019	0.378	0.181	0.3829	0.0049	0.2019	0.378	0.181	TRUE	FALSE	FALSE	FALSE	FALSE	TRUE	FALSE	TRUE	TRUE	TRUE	TRUE	TRUE	TRUE
A3	ENSG00000204536	CCHCR1	chr6:31125944:31125971:-@chr6:31124721|31124866:31124508:-	0.06	0.1	0.42	0.43	0.23	0.65	0.11	0.09	0.0123892	0.165563	0.19032	0.474351	0.00177088	0.0806	0.4285	0.4455	0.1075	-0.3479	-0.3649	-0.0269	-0.017	0.321	0.3479	0.3649	0.0269	0.017	0.321	TRUE	FALSE	FALSE	FALSE	TRUE	TRUE	TRUE	TRUE	TRUE	TRUE	TRUE	TRUE	TRUE
A3	ENSG00000026950	BTN3A1	chr6:26402465:26402640:+@chr6:26405600|26405770:26405876:+	0.88	0.89	0.82	0.82	0.8	0.83	0.77	0.78	0.0223687	0.0629252	0.00271528	0.43915	0.0413574	0.8856	0.8235	0.8205	0.7825	0.0621	0.0651	0.1031	0.003	0.041	0.0621	0.0651	0.1031	0.003	0.041	TRUE	FALSE	TRUE	FALSE	FALSE	TRUE	FALSE	FALSE	TRUE	FALSE	TRUE	TRUE	FALSE
A3	ENSG00000221988	PPT2	chr6:32121229:32121413:+@chr6:32121776|32121973:32122181:+	0.48	0.48	0.58	0.56	0.4	0.51	0.51	0.48	0.0322263	0.389398	0.186082	0.141705	0.0349397	0.4806	0.5735	0.4605	0.5025	-0.0929	0.0201	-0.0219	0.113	0.071	0.0929	0.0201	0.0219	0.113	0.071	TRUE	FALSE	FALSE	FALSE	TRUE	TRUE	TRUE	TRUE	TRUE	TRUE	TRUE	TRUE	TRUE
A3	ENSG00000221988,ENSG00000258388	PPT2,XXbac-BPG300A18.12	chr6:32122364:32122554:+@chr6:32123465|32123545:32123560:+	0.05	0.02	0.33	0.46	0.23	0.1	0.05	0.14	0.049562	0.135222	0.181895	0.065662	0.0389521	0.0356	0.3985	0.1705	0.1025	-0.3629	-0.1349	-0.0669	0.228	0.296	0.3629	0.1349	0.0669	0.228	0.296	TRUE	FALSE	FALSE	FALSE	TRUE	TRUE	TRUE	TRUE	TRUE	TRUE	TRUE	TRUE	TRUE
A3	ENSG00000198563,ENSG00000254870	DDX39B,ATP6V1G2-DDX39B	chr6:31509727:31509925:-@chr6:31508311|31508441:31508099:-	0.55	0.58	0.67	0.69	0.61	0.62	0.61	0.58	0.0142583	0.0659375	0.107399	0.0295487	0.0269808	0.5656	0.6835	0.6205	0.6025	-0.1179	-0.0549	-0.0369	0.063	0.081	0.1179	0.0549	0.0369	0.063	0.081	TRUE	FALSE	FALSE	TRUE	TRUE	TRUE	TRUE	TRUE	TRUE	TRUE	TRUE	TRUE	TRUE
A3	ENSG00000204231	RXRB	chr6:33163347:33163479:-@chr6:33163231|33163243:33163140:-	0.24	0.22	0.44	0.42	0.26	0.26	0.28	0.23	0.00247204	0.0918303	0.200015	0.0177401	0.0302414	0.2306	0.4335	0.2655	0.2625	-0.2029	-0.0349	-0.0319	0.168	0.171	0.2029	0.0349	0.0319	0.168	0.171	TRUE	FALSE	FALSE	TRUE	TRUE	TRUE	TRUE	TRUE	TRUE	TRUE	TRUE	TRUE	TRUE
A3	ENSG00000197062	RP5-874C20.3	chr6:28234788:28234991:+@chr6:28239632|28239663:28240564:+	0.85	0.82	0.92	0.9	0.79	0.91	0.83	0.85	0.0342033	0.399367	0.298007	0.255641	0.021949	0.8356	0.9135	0.8555	0.8475	-0.0779	-0.0199	-0.0119	0.058	0.066	0.0779	0.0199	0.0119	0.058	0.066	TRUE	FALSE	FALSE	FALSE	TRUE	TRUE	TRUE	TRUE	TRUE	TRUE	TRUE	TRUE	TRUE
A3	ENSG00000143575	HAX1	chr1:154247426:154247477:+@chr1:154247554|154247630:154247736:+	0.45	0.43	0.64	0.62	0.42	0.19	0.58	0.51	0.00273071	0.229185	0.0834101	0.107412	0.118959	0.4406	0.6335	0.3105	0.5525	-0.1929	0.1301	-0.1119	0.323	0.081	0.1929	0.1301	0.1119	0.323	0.081	TRUE	FALSE	FALSE	FALSE	FALSE	TRUE	FALSE	TRUE	TRUE	TRUE	TRUE	TRUE	TRUE
A3	ENSG00000234741	GAS5	chr1:173834648:173834685:-@chr1:173833842|173834420:173833395:-	0.57	0.53	0.46	0.41	0.51	0.47	0.47	0.46	0.037831	0.0951937	0.0744359	0.10831	0.195948	0.5506	0.4385	0.4955	0.4725	0.1121	0.0551	0.0781	-0.057	-0.034	0.1121	0.0551	0.0781	0.057	0.034	TRUE	FALSE	FALSE	FALSE	FALSE	TRUE	FALSE	TRUE	TRUE	TRUE	TRUE	TRUE	TRUE
A3	ENSG00000058673	ZC3H11A	chr1:203764799:203764922:+@chr1:203770703|203772085:203772144:+	0.76	0.77	0.7	0.69	0.7	0.68	0.75	0.73	0.00454364	0.0234747	0.136887	0.405611	0.0392744	0.7656	0.6985	0.6955	0.7475	0.0671	0.0701	0.0181	0.003	-0.049	0.0671	0.0701	0.0181	0.003	0.049	TRUE	TRUE	FALSE	FALSE	FALSE	TRUE	FALSE	FALSE	TRUE	FALSE	TRUE	FALSE	TRUE
A3	ENSG00000156171	DRAM2	chr1:111682660:111682838:-@chr1:111682288|111682333:111682123:-	0.39	0.38	0.51	0.47	0.43	0.51	0.43	0.48	0.0472395	0.132363	0.0956254	0.370088	0.221004	0.3856	0.4935	0.4755	0.4625	-0.1079	-0.0899	-0.0769	0.018	0.031	0.1079	0.0899	0.0769	0.018	0.031	TRUE	FALSE	FALSE	FALSE	FALSE	TRUE	FALSE	TRUE	TRUE	TRUE	TRUE	TRUE	TRUE
A3	ENSG00000117266	CDK18	chr1:205492275:205492425:+@chr1:205492611|205492636:205492843:+	0.92	0.9	0.8	0.8	0.75	0.82	0.86	0.88	0.0305443	0.0801986	0.0772324	0.388264	0.0445569	0.9106	0.8035	0.7905	0.8775	0.1071	0.1201	0.0331	0.013	-0.074	0.1071	0.1201	0.0331	0.013	0.074	TRUE	FALSE	FALSE	FALSE	TRUE	TRUE	TRUE	TRUE	TRUE	TRUE	TRUE	TRUE	TRUE
A3	ENSG00000011009	LYPLA2	chr1:24120714:24120815:+@chr1:24120917|24121042:24121090:+	0.6	0.63	0.54	0.5	0.34	0.42	0.37	0.56	0.0356459	0.0408335	0.185112	0.0678261	0.343818	0.6156	0.5235	0.3855	0.4725	0.0921	0.2301	0.1431	0.138	0.051	0.0921	0.2301	0.1431	0.138	0.051	TRUE	TRUE	FALSE	FALSE	FALSE	TRUE	FALSE	FALSE	TRUE	FALSE	TRUE	FALSE	TRUE
A3	ENSG00000143418	CERS2	chr1:150940871:150940988:-@chr1:150940650|150940677:150940559:-	0.85	0.83	0.88	0.9	0.82	0.92	0.92	0.91	0.0349832	0.306938	0.0237309	0.391296	0.0914262	0.8406	0.8935	0.8755	0.9225	-0.0529	-0.0349	-0.0819	0.018	-0.029	0.0529	0.0349	0.0819	0.018	0.029	TRUE	FALSE	TRUE	FALSE	FALSE	TRUE	FALSE	FALSE	TRUE	FALSE	TRUE	TRUE	FALSE
A3	ENSG00000185499	MUC1	chr1:155162478:155162684:-@chr1:155162074|155162311:155161974:-	0.56	0.58	0.74	0.73	0.7	0.53	0.69	0.71	0.00719393	0.330097	0.00545319	0.197555	0.0844184	0.5706	0.7385	0.6205	0.7075	-0.1679	-0.0499	-0.1369	0.118	0.031	0.1679	0.0499	0.1369	0.118	0.031	TRUE	FALSE	TRUE	FALSE	FALSE	TRUE	FALSE	FALSE	TRUE	FALSE	TRUE	TRUE	FALSE
A3	ENSG00000143156	NME7	chr1:169336946:169337186:-@chr1:169293707|169293738:169293631:-	0.83	0.82	0.77	0.76	0.93	0.84	0.94	0.89	0.00813077	0.189941	0.0719587	0.109828	0.0457485	0.8256	0.7685	0.8905	0.9225	0.0571	-0.0649	-0.0969	-0.122	-0.154	0.0571	0.0649	0.0969	0.122	0.154	TRUE	FALSE	FALSE	FALSE	TRUE	TRUE	TRUE	TRUE	TRUE	TRUE	TRUE	TRUE	TRUE
A3	NA	NA	chr1:161147213:161147758:-@chr1:161146298|161146896:161146224:-	0.81	0.83	0.75	0.76	0.69	0.86	0.82	0.81	0.024573	0.360409	0.439978	0.419859	0.00681732	0.8206	0.7585	0.7805	0.8225	0.0621	0.0401	-0.0019	-0.022	-0.064	0.0621	0.0401	0.0019	0.022	0.064	TRUE	FALSE	FALSE	FALSE	TRUE	TRUE	TRUE	TRUE	TRUE	TRUE	TRUE	TRUE	TRUE
A3	ENSG00000189171	S100A13	chr1:153604510:153604716:-@chr1:153603554|153603587:153603487:-	0.67	0.66	0.76	0.74	0.43	0.28	0.56	0.68	0.0142242	0.0754271	0.321009	0.0572867	0.139371	0.6656	0.7535	0.3605	0.6275	-0.0879	0.3051	0.0381	0.393	0.126	0.0879	0.3051	0.0381	0.393	0.126	TRUE	FALSE	FALSE	FALSE	FALSE	TRUE	FALSE	TRUE	TRUE	TRUE	TRUE	TRUE	TRUE
A3	ENSG00000143409	FAM63A	chr1:150978788:150979273:-@chr1:150974646|150974787:150974641:-	0.05	0.05	0.24	0.21	0.28	0.09	0.2	0.32	0.0258057	0.1891	0.0865788	0.378398	0.317294	0.0506	0.2285	0.1905	0.2675	-0.1779	-0.1399	-0.2169	0.038	-0.039	0.1779	0.1399	0.2169	0.038	0.039	TRUE	FALSE	FALSE	FALSE	FALSE	TRUE	FALSE	TRUE	TRUE	TRUE	TRUE	TRUE	TRUE
A3	ENSG00000143409	FAM63A	chr1:150978788:150979273:-@chr1:150974646|150974799:150974641:-	0.11	0.05	0.26	0.33	0.27	0.08	0.28	0.29	0.0225091	0.237089	0.0411628	0.207947	0.446839	0.0806	0.2985	0.1805	0.2925	-0.2179	-0.0999	-0.2119	0.118	0.006	0.2179	0.0999	0.2119	0.118	0.006	TRUE	FALSE	TRUE	FALSE	FALSE	TRUE	FALSE	FALSE	TRUE	FALSE	TRUE	TRUE	FALSE
A3	ENSG00000169241	SLC50A1	chr1:155109304:155109427:+@chr1:155110037|155110055:155110198:+	0.97	0.96	0.91	0.91	0.84	0.95	0.95	0.95	0.0318621	0.224061	0.186324	0.426762	0.000129082	0.9656	0.9135	0.9005	0.9575	0.0521	0.0651	0.0081	0.013	-0.044	0.0521	0.0651	0.0081	0.013	0.044	TRUE	FALSE	FALSE	FALSE	FALSE	TRUE	FALSE	TRUE	TRUE	TRUE	TRUE	TRUE	TRUE
A3	ENSG00000168614	NBPF9	chr1:144821921:144822084:+@chr1:144823052|144823128:144823179:+	0.19	0.15	0.34	0.39	0.35	0.3	0.22	0.24	0.0146152	0.0200332	0.0696183	0.197573	0.043006	0.1706	0.3685	0.3305	0.2375	-0.1979	-0.1599	-0.0669	0.038	0.131	0.1979	0.1599	0.0669	0.038	0.131	TRUE	TRUE	FALSE	FALSE	TRUE	TRUE	TRUE	FALSE	TRUE	FALSE	TRUE	FALSE	TRUE
A3	ENSG00000171608	PIK3CD	chr1:9780669:9780719:+@chr1:9780800|9780803:9780967:+	0.72	0.71	0.6	0.61	0.62	0.86	0.65	0.78	0.0025732	0.422592	0.466616	0.229492	0.16519	0.7156	0.6085	0.7455	0.7225	0.1071	-0.0299	-0.0069	-0.137	-0.114	0.1071	0.0299	0.0069	0.137	0.114	TRUE	FALSE	FALSE	FALSE	FALSE	TRUE	FALSE	TRUE	TRUE	TRUE	TRUE	TRUE	TRUE
A3	ENSG00000204084	INPP5B	chr1:38345757:38345866:-@chr1:38343995|38344164:38343860:-	0.57	0.71	0.22	0.33	0.57	0.33	0.48	0.62	0.0300565	0.169421	0.244932	0.177509	0.0479727	0.6406	0.2785	0.4555	0.5575	0.3621	0.1851	0.0831	-0.177	-0.279	0.3621	0.1851	0.0831	0.177	0.279	TRUE	FALSE	FALSE	FALSE	TRUE	TRUE	TRUE	TRUE	TRUE	TRUE	TRUE	TRUE	TRUE
A3	ENSG00000121775	TMEM39B	chr1:32541204:32541423:+@chr1:32557273|32557276:32557612:+	0.14	0.1	0.25	0.23	0.34	0.24	0.06	0.07	0.0321383	0.0687457	0.118776	0.240287	0.00484556	0.1206	0.2435	0.2955	0.0725	-0.1229	-0.1749	0.0481	-0.052	0.171	0.1229	0.1749	0.0481	0.052	0.171	TRUE	FALSE	FALSE	FALSE	TRUE	TRUE	TRUE	TRUE	TRUE	TRUE	TRUE	TRUE	TRUE
A3	ENSG00000117155	SSX2IP	chr1:85122031:85122167:-@chr1:85121685|85121688:85121515:-	0.61	0.54	0.73	0.77	0.85	0.85	0.7	0.87	0.0358453	0.0400191	0.10181	0.0630432	0.364023	0.5756	0.7535	0.8555	0.7925	-0.1779	-0.2799	-0.2169	-0.102	-0.039	0.1779	0.2799	0.2169	0.102	0.039	TRUE	TRUE	FALSE	FALSE	FALSE	TRUE	FALSE	FALSE	TRUE	FALSE	TRUE	FALSE	TRUE
A3	ENSG00000221978	CCNL2	chr1:1328776:1328840:-@chr1:1326245|1328183:1326146:-	0.71	0.74	0.57	0.56	0.52	0.65	0.59	0.59	0.0208389	0.137778	0.035976	0.396879	0.0473039	0.7256	0.5685	0.5905	0.5975	0.1571	0.1351	0.1281	-0.022	-0.029	0.1571	0.1351	0.1281	0.022	0.029	TRUE	FALSE	TRUE	FALSE	FALSE	TRUE	FALSE	FALSE	TRUE	FALSE	TRUE	TRUE	FALSE
A3	ENSG00000160753	RUSC1	chr1:155295655:155295701:+@chr1:155296401|155296689:155296923:+	0.44	0.48	0.57	0.53	0.54	0.5	0.5	0.47	0.0391559	0.0717221	0.165107	0.208397	0.0694715	0.4606	0.5535	0.5255	0.4925	-0.0929	-0.0649	-0.0319	0.028	0.061	0.0929	0.0649	0.0319	0.028	0.061	TRUE	FALSE	FALSE	FALSE	FALSE	TRUE	FALSE	TRUE	TRUE	TRUE	TRUE	TRUE	TRUE
A3	NA	NA	chr1:205473684:205473924:+@chr1:205492275|205492611:205492753:+	0.9	0.86	0.76	0.78	0.76	0.82	0.73	0.86	0.036275	0.0821677	0.217012	0.300249	0.367393	0.8806	0.7735	0.7955	0.8025	0.1071	0.0851	0.0781	-0.022	-0.029	0.1071	0.0851	0.0781	0.022	0.029	TRUE	FALSE	FALSE	FALSE	FALSE	TRUE	FALSE	TRUE	TRUE	TRUE	TRUE	TRUE	TRUE
A3	ENSG00000080189	SLC35C2	chr20:44987026:44987402:-@chr20:44986341|44986412:44986262:-	0.85	0.88	0.74	0.78	0.79	0.81	0.73	0.9	0.0329376	0.0450251	0.351362	0.125431	0.307069	0.8656	0.7635	0.8055	0.8225	0.1021	0.0601	0.0431	-0.042	-0.059	0.1021	0.0601	0.0431	0.042	0.059	TRUE	TRUE	FALSE	FALSE	FALSE	TRUE	FALSE	FALSE	TRUE	FALSE	TRUE	FALSE	TRUE
A3	ENSG00000101197	BIRC7	chr20:61870514:61870585:+@chr20:61870710|61870764:61870962:+	0.88	0.88	0.77	0.76	0.77	0.76	0.81	0.77	0.0122249	0.0124503	0.0733013	0.391535	0.183825	0.8806	0.7685	0.7705	0.7975	0.1121	0.1101	0.0831	-0.002	-0.029	0.1121	0.1101	0.0831	0.002	0.029	TRUE	TRUE	FALSE	FALSE	FALSE	TRUE	FALSE	FALSE	TRUE	FALSE	TRUE	FALSE	TRUE
A3	ENSG00000101040	ZMYND8	chr20:45938800:45938948:-@chr20:45927616|45927691:45927473:-	0.73	0.66	0.51	0.47	0.75	0.63	0.6	0.69	0.0306073	0.499502	0.268345	0.0776325	0.0686691	0.6956	0.4935	0.6955	0.6525	0.2021	0.0001	0.0431	-0.202	-0.159	0.2021	0.0001	0.0431	0.202	0.159	TRUE	FALSE	FALSE	FALSE	FALSE	TRUE	FALSE	TRUE	TRUE	TRUE	TRUE	TRUE	TRUE
A3	ENSG00000232803	RP11-93B14.5	chr20:61297737:61297973:-@chr20:61294776|61294839:61294371:-	0.72	0.62	0.41	0.38	0.5	0.51	0.27	0.54	0.0479156	0.0952823	0.141227	0.0270243	0.46727	0.6706	0.3985	0.5105	0.4125	0.2721	0.1601	0.2581	-0.112	-0.014	0.2721	0.1601	0.2581	0.112	0.014	TRUE	FALSE	FALSE	TRUE	FALSE	TRUE	TRUE	TRUE	TRUE	TRUE	TRUE	TRUE	TRUE
[truncated: 4,477 more rows]
