# Supplementary material for: An extensive program of periodic alternative splicing linked to cell cycle progression
Source: eLife. 2016 Mar 25;5:e10288. doi: 10.7554/eLife.10288 (PMC4884079; doi:10.7554/eLife.10288)
Supplement: Supplementary file 4. — DOI: http://dx.doi.org/10.7554/eLife.10288.021 [file elife-10288-supp4.xlsx]

## Sheet: Primers and shRNA
Gene Name		Primer Sequence (5'-3')	Used For
AURKB	Forward	GTACTTGGCTCGGGAGAAGA	Splicing
	Reverse	GGGGGCATACTCTAGAATCAA	Splicing
CENPE	Forward	GGAACTAAAAACTGCTCGTATGC	Splicing
	Reverse	CTCAGGCTTTCCGTAAGGTG	Splicing
CHEK2 exon5	Forward	CAGCTCTCAATGTTGAAACAGAA	Splicing
	Reverse	CAGCCAAGAGCATCTGGTAA	Splicing
CHEK2 exon9	Forward	CGCCTGAAAGAAGCTACCTG	Splicing
	Reverse	TAGGTGGGGGTTCCACATAA	Splicing
CLK1 exon 4	Forward	GAAAGCCGGTATCAGAACCA	Splicing
	Reverse	TTTCCAAAAGCTCCTTCACC	Splicing
CLK1 RT primers	Forward	ACTTTCCGCTGTGTCCAGAT	Real Time
	Reverse	CCAGTCGAAATGGTAGAAAACC	Real Time
CLK4	Forward	AAAGCGGGTATCGAATCCA	Splicing
	Reverse	TCTGGACACATCGGAAGACA	Splicing
BORA 3&4	Forward	AGTGATTATTCTAATCTCCATGAACAA	Splicing
	Reverse	ACTGGAATGACATTGTGAAAGC	Splicing
BORA exon 3	Forward	TCTCGCCAGTCCTTCTGTTT	Splicing
	Reverse	TCTTCAATGGCTTTTTGTCTTTT	Splicing
HMMR	Forward	GCCTGCTTCAGCTAGAAAAGTT	Splicing
	Reverse	AGCATTTAGCCTTGCTTCCA	Splicing
MED31	Forward	GCTGCTGTCGCTATGGAG	Splicing
	Reverse	GCTCCTTTCGGAAGTGTTCA	Splicing
OS9	Forward	AGAGGGTTGTCCCCAAAAAG	Splicing
	Reverse	GGGCGGACAATTTTGATCT	Splicing
	Target	Cat #
shRNA Target	CLK1_1	TRCN0000000754
	CLK1_2	TRCN0000000755
	CLK1_3	TRCN0000000756
	CLK1_4	TRCN0000000758
	CLK1 and CLK4_5	Custom Seq (GAGGATGATGAGGAGGGTCACC)

## Sheet: Antibodies
Antigen	Company (Cat#)	Dilution (Application)
CCNA	Cell Signaling (BF683)	1:2000 (WB)
CCNB1	Cell Signaling (V152)	1:2000 (WB)
CCNE1	Cell Signaling (H12)	1:2000 (WB)
CDC6	Cell Signaling Santa Cruz (180.2)	1:1000 (WB)
CENPE	Abcam (ab5093)	1:500 (WB)
CLK1	Abcam (71408, 71404)	1:500 (WB)
CLK2	Abcam (65082)	1:1000 (WB)
DAZAP1	Santa Cruz (H87)	1:1000 (WB)
EMERIN	Gift from A. Whitehurst	1:200 (IF)
H3 SER 10	Abcam (ab5176)	1:2000 (WB)
HNRNPA0	Cell Signaling (40468)	1:1000 (WB)
HNRNPA1	Cell Signaling (K350)	1:1000 (WB)
HNRNPA2	Cell Signaling (2A2)	1:1000 (WB)
HNRNPA3	Santa Cruz (Y-25)	1:1000 (WB)
HNRNPF	Abcam (50982)	1:1000 (WB)
NEK2	Gift from A. Whitehurst	1:1000 (WB)
PTBP1	Gift from W. Marluff	1:1000 (WB)
PTG1	Gift from A. Whitehurst	1:500 (WB)
RBM4	Santa Cruz (98346)	1:1000 (WB)
SLBP	Gift from W. Marluff	1:1000 (WB)
SRPK1	BD Biosciences (611072)	1:1000 (WB)
SRSF1	Santa Cruz (36268)	1:1000 (WB)
TUB1A	Millipore (DM1A)	1:5000 (WB), 1:500 (IF)
UBIQUITIN	Santa Cruz (P4D1)	1:500 (WB)
FLAG	Sigma (M2)	1:1000 (WB)
HA	Cell Signaling (9B11)	1:500 (WB)
MYC	Santa Cruz (A-14)	1:500 (WB)
IF: Immunoflouresence
WB: western blot
