# Supplementary figures and images for: An extensive program of periodic alternative splicing linked to cell cycle progression
Source: eLife journal article supplement (doi:10.7554/elife.10288), 2016-03-25

## Dominguez Figure 2- figure supplement 2

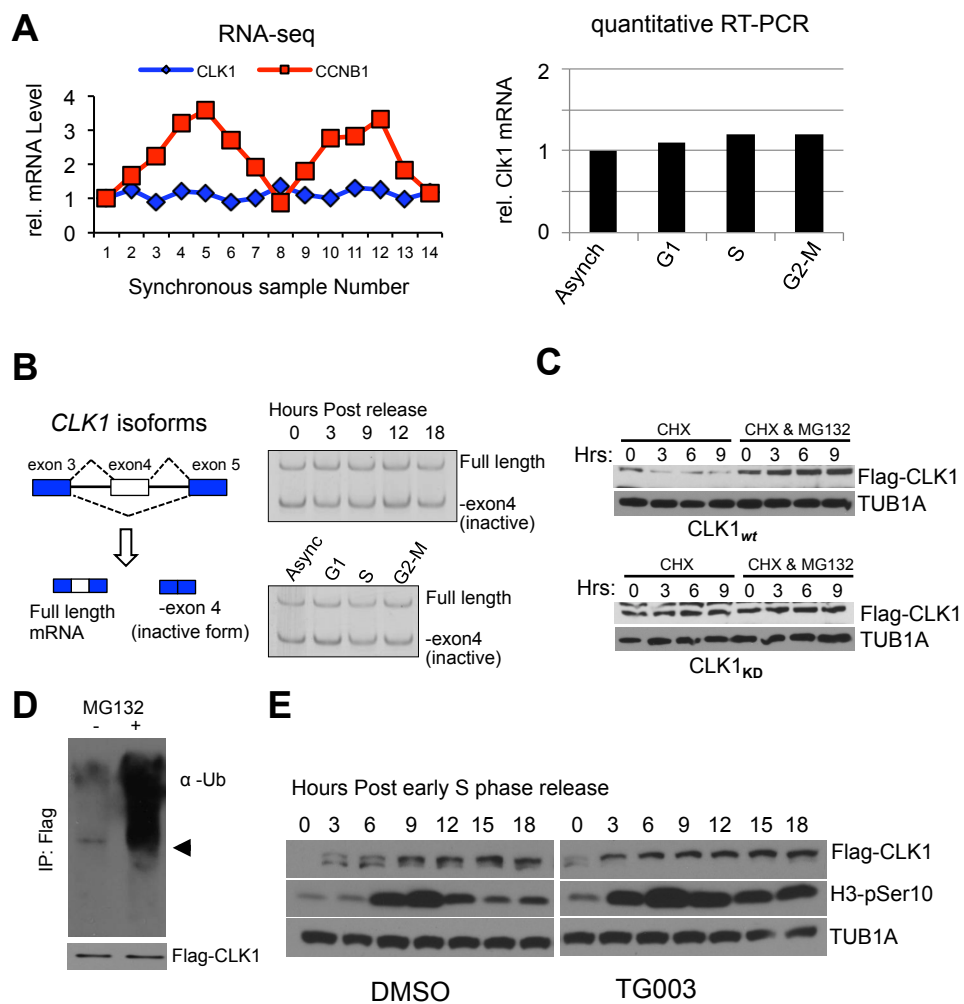

Supplement: supp [file elife-10288-supp-v1.zip]

Dominguez Figure 2- figure supplement 1

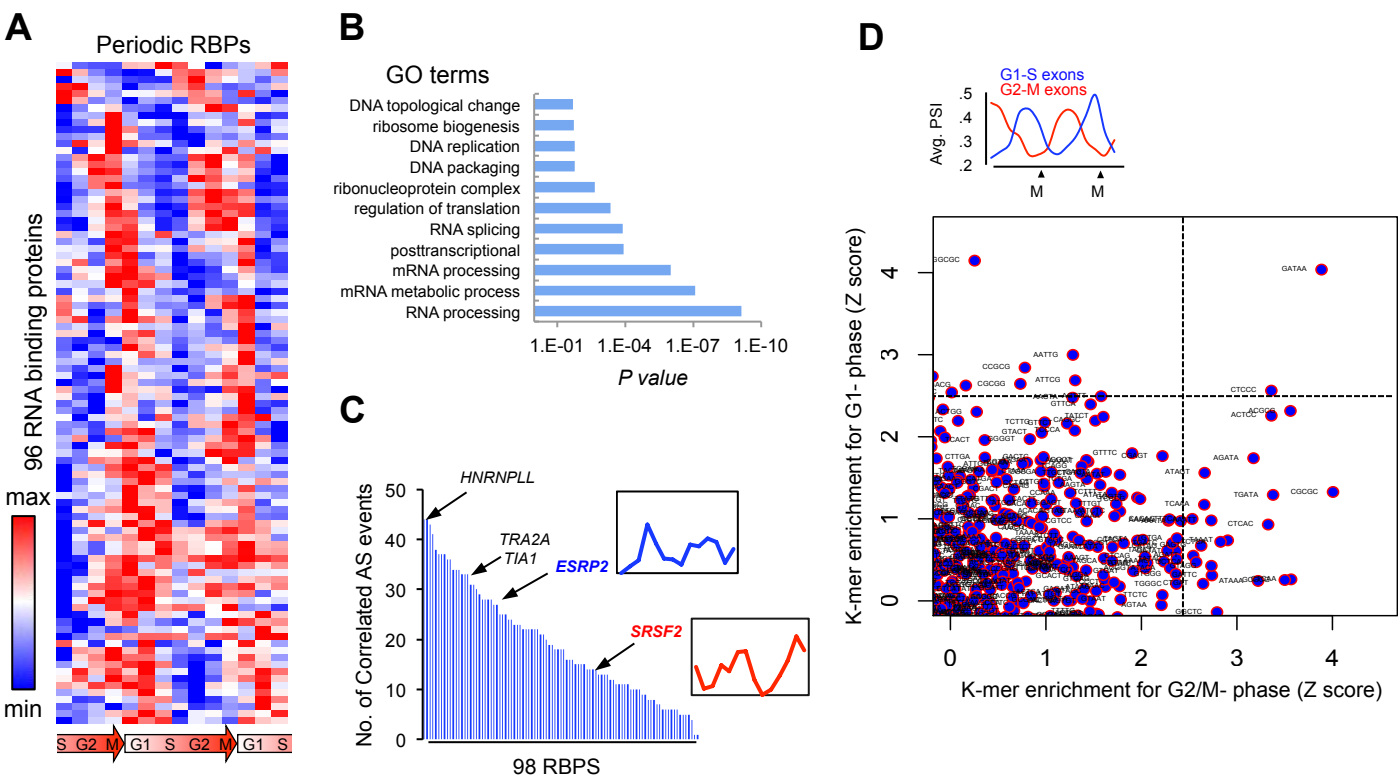

Supplement: supp [file elife-10288-supp-v1.zip]

Dominguez Figure 4- figure supplement 1

**A**

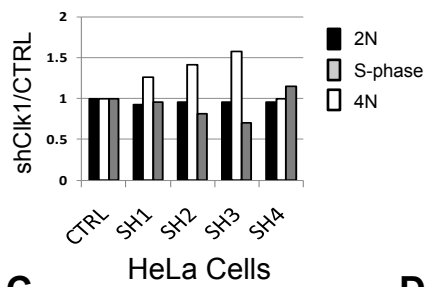

**B**

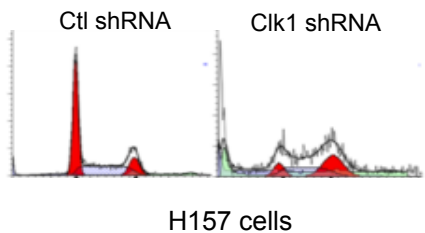

**C**

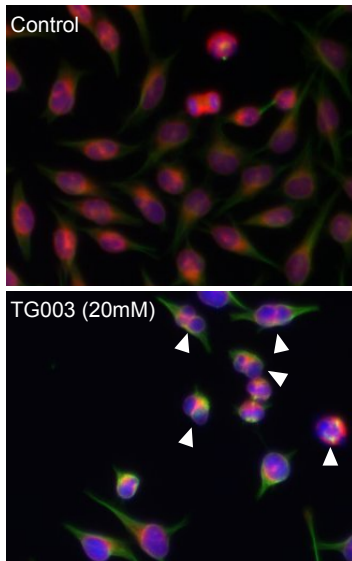

**D**

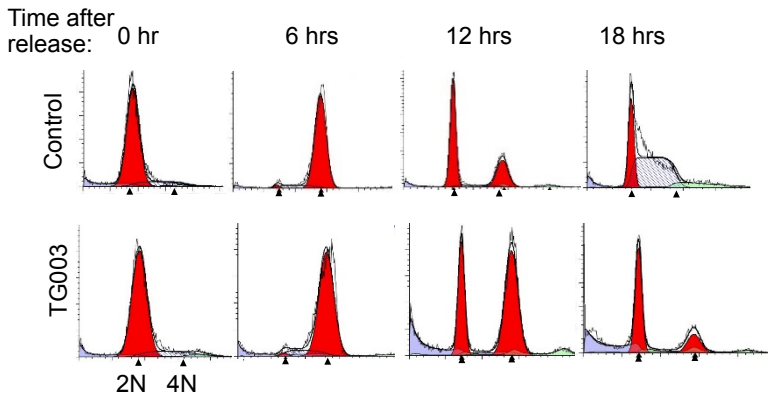

**F**

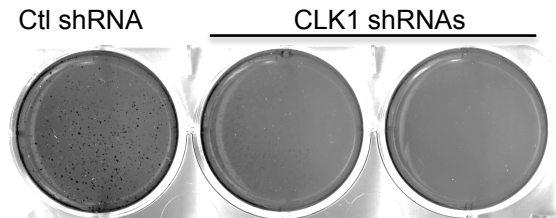

**E**

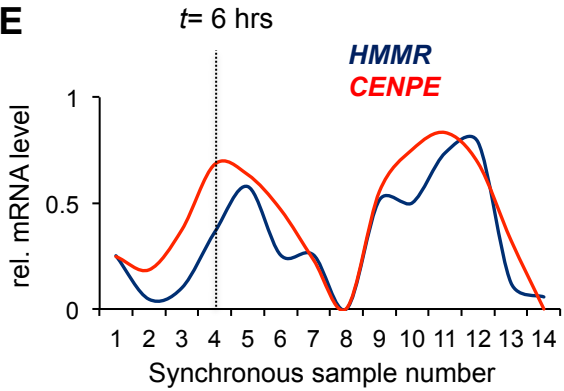

Supplement: supp [file elife-10288-supp-v1.zip]

# Dominguez Figure 3- figure supplement 1

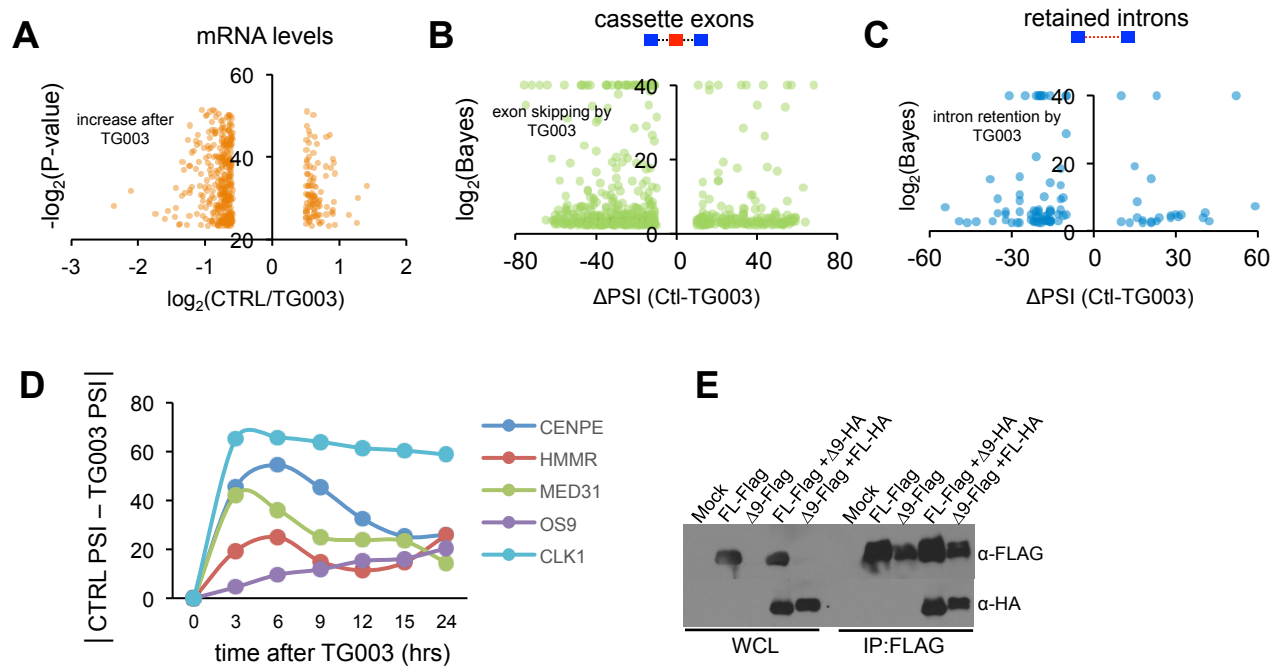

Supplement: supp [file elife-10288-supp-v1.zip]

Dominguez Figure 1- figure supplement 1

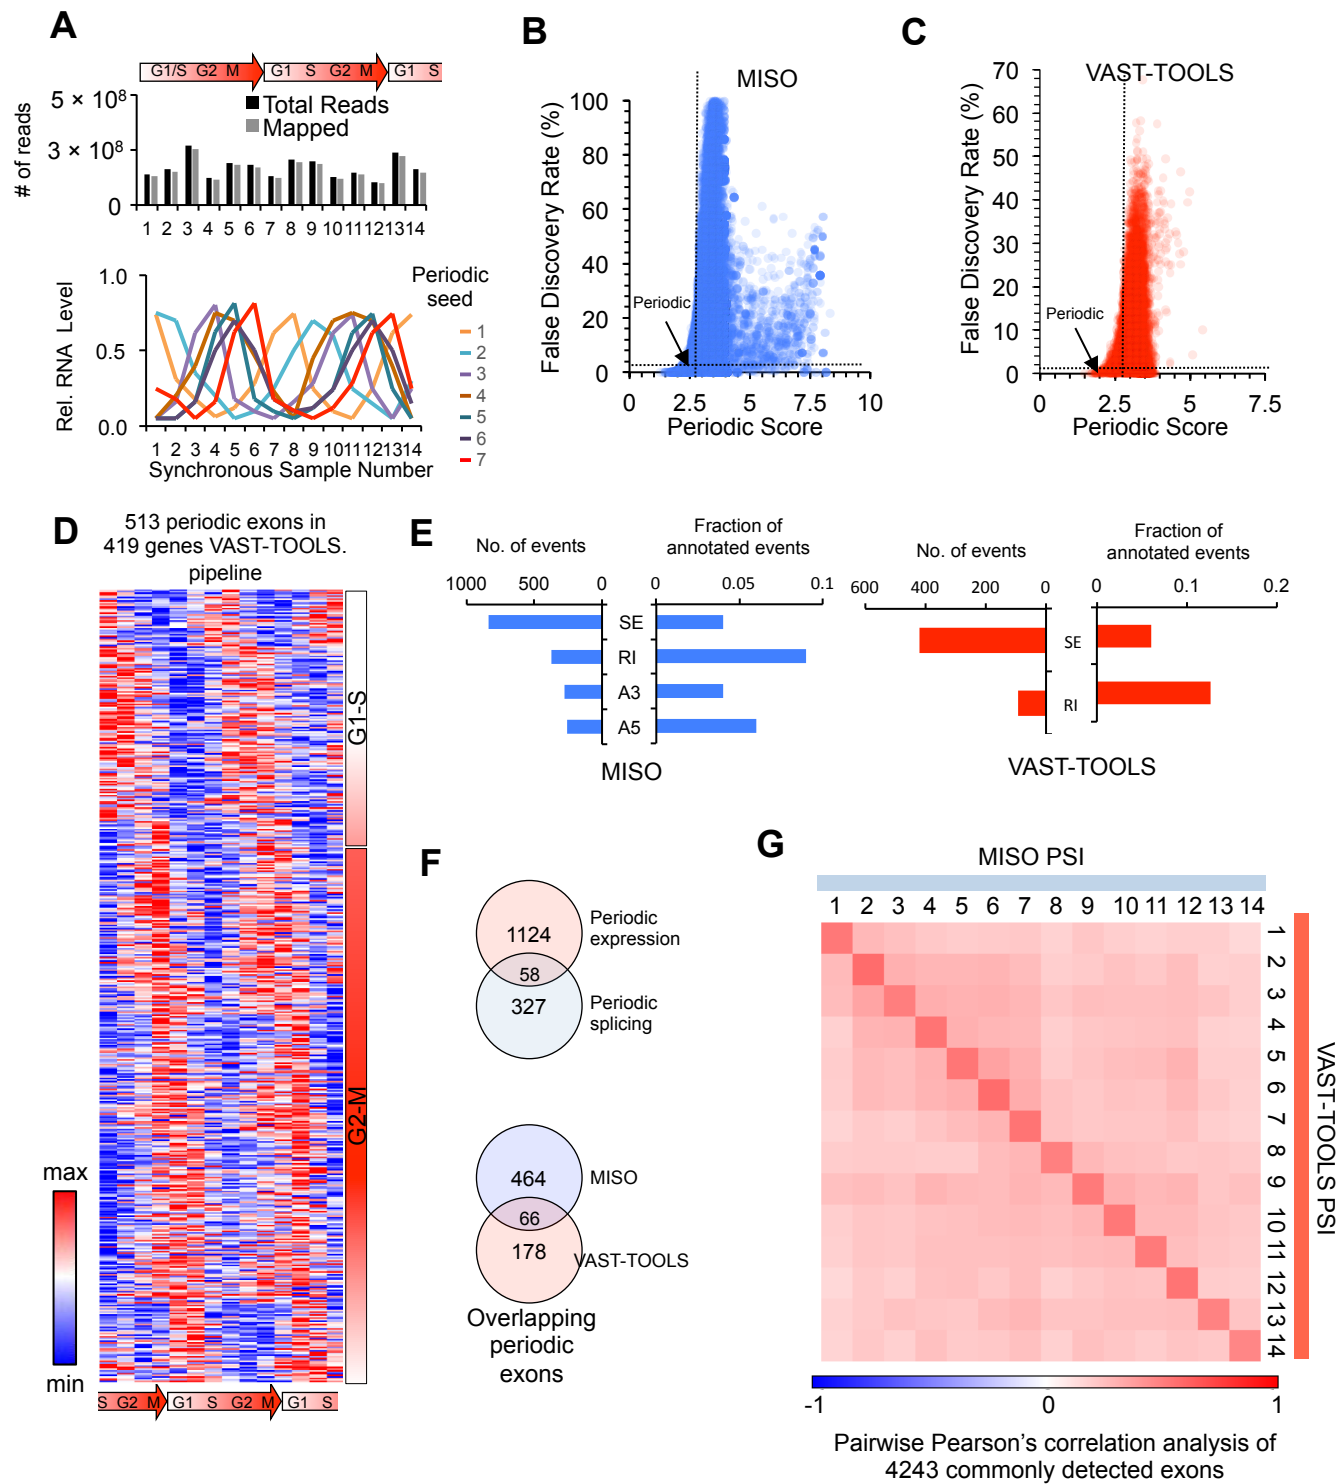

Supplement: supp [file elife-10288-supp-v1.zip]

Dominguez Figure 4- figure supplement 2

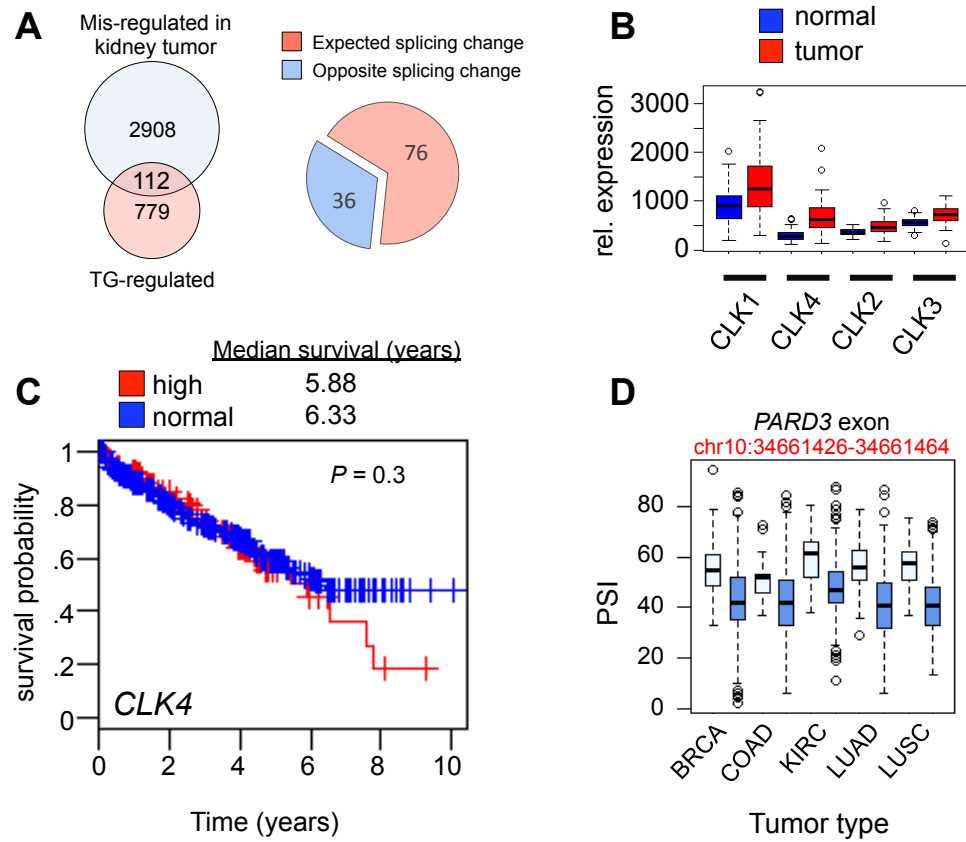

Supplement: supp [file elife-10288-supp-v1.zip]
